# Supplementary material for: Genome-wide strand asymmetry in massively parallel reporter activity favors genic strands
Source: HighWire-hosted journal article supplement (doi:10.1101/gr.270751.120), 2021-04-20
Supplement: Supplemental_Files.zip [file Supplementary_Data_1_Sig_kmer_regression_results.xlsx]

## Sheet: Supplementary_Data_1_Sig_kmer_r
Supplementary Data 1: Linear regression results for kmers association with RMC from three datasets. Listed are any kmers that scored as the top 5000 most significant in at least one set.
seq	seq_revC	Johnson_rsq_seq	Johnson_rsq_revC	Johnson_mean_rsq	Johnson_lm_slope_estimate	Johnson_lm_slope_estimate_revC	Johnson_p	Johnson_p_revC	Johnson_max_either_p	Johnson_T	Johnson_TrevC	Johnson_obs	Johnson_obs_revC	VanArens_HepG2_rsq_seq	VanArens_HepG2_rsq_revC	VanArens_HepG2_mean_rsq	VanArens_HepG2_lm_slope_estimate	VanArens_HepG2_lm_slope_estimate_revC	VanArens_HepG2_p	VanArens_HepG2_p_revC	VanArens_HepG2_max_either_p	VanArens_HepG2_T	VanArens_HepG2_TrevC	VanArens_HepG2_obs	VanArens_HepG2_obs_revC	VanArens_K562_rsq_seq	VanArens_K562_rsq_revC	VanArens_K562_mean_rsq	VanArens_K562_lm_slope_estimate	VanArens_K562_lm_slope_estimate_revC	VanArens_K562_p	VanArens_K562_p_revC	VanArens_K562_max_either_p	VanArens_K562_T	VanArens_K562_TrevC	VanArens_K562_obs	VanArens_K562_obs_revC
A	T	0.00417297	0.00424383	0.0042084	-0.000886658	0.000892339	0	0	0	-55.0451	55.5125	723056	723054	0.07639	0.0774876	0.0769388	-0.0151896	0.0152894	0	0	0	-246.926	248.841	737197	737193	0.0294206	0.0300554	0.029738	-0.00632268	0.00638415	0	0	0	-150.959	152.629	751787	751785
C	G	1.4e-07	3.86e-07	2.63e-07	-6.2e-06	-1.03e-05	0.749976	0.597277	0.749976	-0.318671	-0.528321	723048	723045	0.013577	0.0130843	0.0133307	-0.00762116	0.0075088	0	0	0	-100.731	98.8616	737187	737188	0.00923087	0.00881876	0.00902482	-0.00425069	0.00416569	0	0	0	-83.6921	81.7855	751779	751777
AA	TT	0.0016833	0.00188247	0.00178288	-0.000845763	0.000889947	6.92e-267	3.08e-298	6.92e-267	-34.9168	36.9284	722517	722475	0.0630552	0.0638347	0.063445	-0.0206563	0.0207567	0	0	0	-222.739	224.205	736618	736481	0.0262996	0.0265185	0.026409	-0.00892603	0.0089475	0	0	0	-142.499	143.107	751180	751039
AC	GT	0.00558424	0.00591369	0.00574896	-0.00409045	0.00421235	0	0	0	-63.7215	65.585	722902	722896	0.10776	0.10804	0.1079	-0.0735844	0.0735863	0	0	0	-298.387	298.821	737033	737033	0.0364729	0.036774	0.0366234	-0.0287804	0.0288906	0	0	0	-168.695	169.416	751611	751604
AG	CT	0.00283188	0.00283304	0.00283246	-0.00220915	0.00220626	0	0	0	-45.3149	45.3242	722889	722887	0.00699906	0.00693476	0.00696691	-0.0139579	0.0138693	0	0	0	-72.0837	71.7495	737049	737021	0.00241657	0.00244969	0.00243313	-0.00554661	0.00557507	0	0	0	-42.6751	42.9672	751618	751581
AT	AT	3.75e-06	3.75e-06	3.75e-06	-6.6e-05	-6.6e-05	0.0996136	0.0996136	0.0996136	-1.64673	-1.64673	722710	722710	8.32e-07	8.32e-07	8.32e-07	0.000119473	0.000119473	0.433458	0.433458	0.433458	0.783289	0.783289	736870	736870	1.6e-06	1.6e-06	1.6e-06	0.000110849	0.000110849	0.272181	0.272181	0.272181	1.09805	1.09805	751446	751446
CA	TG	0.00857136	0.00826498	0.00841817	-0.00440505	0.00433332	0	0	0	-79.0646	77.6267	722997	722972	0.0963928	0.0977135	0.0970532	-0.0597295	0.0602401	0	0	0	-280.43	282.551	737134	737118	0.0552414	0.055204	0.0552227	-0.0304566	0.0304848	0	0	0	-209.663	209.587	751711	751694
CC	GG	0.000349656	0.000442016	0.000395836	0.000567412	-0.000640759	6.16e-57	1.7e-71	6.16e-57	15.9032	-17.8814	722428	722401	0.00627166	0.00580889	0.00604028	-0.00958969	0.00925778	0	0	0	-68.2103	65.6302	736452	736447	0.00416903	0.00379697	0.003983	-0.00531065	0.0050776	0	0	0	-56.1014	53.5296	750942	750924
CG	CG	3.47e-06	3.47e-06	3.47e-06	0.000133432	0.000133432	0.113393	0.113393	0.113393	1.58313	1.58313	606502	606502	8.17e-06	8.17e-06	8.17e-06	-0.000843115	-0.000843115	0.0141276	0.0141276	0.0141276	-2.45401	-2.45401	615107	615107	3.83e-06	3.83e-06	3.83e-06	-0.00040319	-0.00040319	0.0896257	0.0896257	0.0896257	-1.69738	-1.69738	623439	623439
GA	TC	0.0009991	0.00111877	0.00105893	-0.00139284	0.00147494	3.34e-159	4.9e-178	3.34e-159	-26.8912	28.4578	722824	722842	0.00389012	0.00399629	0.00394321	-0.0111351	0.0112888	0	0	0	-53.6563	54.3864	736963	736956	0.000148701	0.000130497	0.000139599	0.00147456	-0.00138189	3.95e-26	3.95e-23	3.95e-23	10.574	-9.90552	751523	751509
GC	GC	2.43e-06	2.43e-06	2.43e-06	-7.07e-05	-7.07e-05	0.184948	0.184948	0.184948	-1.32567	-1.32567	722795	722795	3.38e-06	3.38e-06	3.38e-06	-0.00033137	-0.00033137	0.114416	0.114416	0.114416	-1.57865	-1.57865	736934	736934	3.28e-06	3.28e-06	3.28e-06	-0.000221989	-0.000221989	0.116078	0.116078	0.116078	-1.57145	-1.57145	751467	751467
TA	TA	1.99e-06	1.99e-06	1.99e-06	-4.9e-05	-4.9e-05	0.230358	0.230358	0.230358	-1.19944	-1.19944	722250	722250	3.6e-08	3.6e-08	3.6e-08	2.5e-05	2.5e-05	0.87058	0.87058	0.87058	0.162922	0.162922	736215	736215	2.21e-06	2.21e-06	2.21e-06	0.000130625	0.000130625	0.197866	0.197866	0.197866	1.28766	1.28766	750825	750825
AAAAAAAA	TTTTTTTT	0.0139213	0.0131676	0.0135444	0.0144753	-0.0139732	0	0	0	101.035	-98.2245	60997	61364	0.000531679	0.000480779	0.000506229	-0.0111106	0.0105246	2.95e-87	4.41e-79	4.41e-79	-19.8031	18.8308	64361	64402	0.000184491	0.000176427	0.000180459	-0.00445902	0.00434275	5.09e-32	1.08e-30	1.08e-30	-11.7781	11.5178	65790	65957
AAAAAAAC	GTTTTTTT	0.000283663	0.000183412	0.000233538	0.0239876	-0.0190514	1.58e-46	1.09e-30	1.09e-30	14.3236	-11.5171	20680	21652	0.00211787	0.00214571	0.00213179	-0.262941	0.26594	0	0	0	-39.5551	39.8148	21453	21471	0.00121981	0.00120802	0.00121391	-0.134395	0.134271	1.46e-201	1.24e-199	1.24e-199	-30.3012	30.1542	22220	22264
AAAAAAAG	CTTTTTTT	0.00434986	0.00426117	0.00430552	0.0682283	-0.0670507	0	0	0	56.2046	-55.6262	41134	41316	0.0020313	0.00193236	0.00198183	-0.185825	0.180635	0	4.92050842363833e-312	4.92050842363833e-312	-38.7366	37.7795	43018	42886	0.00135819	0.00142645	0.00139232	-0.102811	0.104972	3.33e-224	2.25e-235	3.33e-224	-31.976	32.7709	44021	43953
AAAAAAAT	ATTTTTTT	0.00100777	0.0010669	0.00103733	0.0315131	-0.0324504	1.44e-160	7.14e-170	1.44e-160	27.0077	-27.7895	45943	45800	0.00116558	0.0010827	0.00112414	-0.133305	0.128724	5.48e-189	1.09e-175	1.09e-175	-29.3303	28.2671	49159	48910	0.0010859	0.000878016	0.000981958	-0.0866925	0.0780449	1.19e-179	1.24e-145	1.24e-145	-28.5877	25.7034	50699	50529
AAAAAACA	TGTTTTTT	0.000116129	0.000102656	0.000109393	0.0140597	-0.0133698	5.02e-20	6.95e-18	6.95e-18	9.16396	-8.61595	22727	22583	0.00274355	0.0027569	0.00275023	-0.274602	0.278531	0	0	0	-45.0345	45.1443	23478	23301	0.00184014	0.00161375	0.00172694	-0.151635	0.143542	4.49e-303	5.05e-266	5.05e-266	-37.2284	34.8592	24297	24116
AAAAAACC	GGTTTTTT	1.26e-07	3.06e-05	1.54e-05	0.000790452	0.0116861	0.762948	2.51e-06	0.762948	0.301612	4.70755	9853	11069	0.000624207	0.000685517	0.000654862	-0.225457	0.233755	4.12e-102	5.94e-112	4.12e-102	-21.4581	22.488	10011	10225	0.000332172	0.000419479	0.000375826	-0.110752	0.122949	2.92e-56	1.44e-70	2.92e-56	-15.8053	17.7621	10344	10603
AAAAAACT	AGTTTTTT	9.57e-05	0.000113568	0.000104638	-0.0200394	0.0215408	8.87e-17	1.28e-19	8.87e-17	-8.31923	9.06234	11857	12133	0.00213529	0.00215217	0.00214373	-0.379432	0.376049	0	0	0	-39.7178	39.8748	12283	12572	0.000480886	0.000543207	0.000512046	-0.120364	0.12636	1.25e-80	7.81e-91	1.25e-80	-19.0184	20.2139	12882	13153
AAAAAAGA	TCTTTTTT	0.00172425	0.00187443	0.00179934	0.0450843	-0.0465549	2.48e-273	5.68e-297	2.48e-273	35.3397	-36.8493	35127	35524	0.0032941	0.003118	0.00320605	-0.248439	0.240294	0	0	0	-49.3602	48.0185	36626	36741	0.0017537	0.00164059	0.00169715	-0.122462	0.117723	6.31e-289	2.04e-270	2.04e-270	-36.3419	35.1485	37674	37811
AAAAAAGC	GCTTTTTT	3.15e-06	5.16e-06	4.16e-06	0.00397027	-0.00508514	0.131136	0.0533647	0.131136	1.50964	-1.93196	10030	9979	0.000982364	0.000810738	0.000896551	-0.281237	0.257194	1.37e-159	4.75e-132	4.75e-132	-26.9242	24.4573	10366	10193	0.000511457	0.000492403	0.00050193	-0.136757	0.135265	1.24e-85	1.63e-82	1.63e-82	-19.6139	19.2449	10700	10490
AAAAAAGG	CCTTTTTT	0.000277188	0.000213201	0.000245195	0.0313396	-0.027645	1.66e-45	2.12e-35	2.12e-35	14.1591	-12.4174	13942	13835	0.000554272	0.000580633	0.000567453	-0.177845	0.183823	6.96e-91	4.07e-95	6.96e-91	-20.2197	20.6952	14415	14186	0.000224728	0.000297378	0.000261053	-0.0765909	0.0888079	1.24e-38	1.48e-50	1.24e-38	-12.9995	14.9544	14766	14570
AAAAAAGT	ACTTTTTT	8.33e-05	7.57e-05	7.95e-05	0.016497	-0.0156401	8.56e-15	1.38e-13	1.38e-13	7.75912	-7.39836	15231	15299	0.000345919	0.000410989	0.000378454	-0.133229	0.144595	2.05e-57	7.16e-68	2.05e-57	-15.9718	17.4099	16085	16171	0.000380288	0.000389867	0.000385077	-0.0939661	0.0947856	3.79e-64	1.02e-65	3.79e-64	-16.9117	17.1235	16651	16722
AAAAAATA	TATTTTTT	0.000237742	0.000294727	0.000266234	0.0177274	-0.0196251	2.81e-39	2.84e-48	2.81e-39	13.1127	-14.6003	32925	32988	0.00105548	0.00106345	0.00105947	-0.144543	0.144726	2.53e-171	1.34e-172	2.53e-171	-27.9092	28.0144	36096	36078	0.00104051	0.00120967	0.00112509	-0.0965016	0.103865	3.19e-172	6.67e-200	3.19e-172	-27.9832	30.1749	37488	37407
AAAAAATC	GATTTTTT	6.66e-06	1.56e-05	1.11e-05	-0.00480561	0.00735998	0.0281574	0.000776701	0.0281574	-2.19509	3.36098	14210	14249	0.00116099	0.00108122	0.0011211	-0.25344	0.245392	2.98e-188	1.88e-175	1.88e-175	-29.2725	28.2477	14792	14763	0.000865421	0.000834355	0.000849888	-0.146634	0.144003	1.42e-143	1.73e-138	1.73e-138	-25.5182	25.0557	15439	15500
AAAAAATG	CATTTTTT	1.86e-05	2.35e-05	2.1e-05	-0.00678938	0.00768852	0.000247182	3.79e-05	0.000247182	-3.66518	4.12	19900	19552	0.0015812	0.00156918	0.00157519	-0.251949	0.252613	1.12e-255	9.5e-254	9.5e-254	-34.1688	34.0384	20493	20117	0.000636627	0.000592838	0.000614733	-0.107323	0.104079	3.97e-106	5.85e-99	5.85e-99	-21.8842	21.1177	21292	20945
AAAAAATT	AATTTTTT	0.00213109	0.00217073	0.00215091	0.053446	-0.0541191	0	0	0	39.2963	-39.6609	34840	34779	0.000453019	0.000409244	0.000431131	-0.0966279	0.0920862	1.27e-74	1.37e-67	1.37e-67	-18.2789	17.3729	37564	37541	0.000105543	4.99e-05	7.77e-05	-0.0314713	0.0216648	5.2e-19	9.18e-10	9.18e-10	-8.90814	6.12321	38659	38693
AAAAACAA	TTGTTTTT	1.64e-05	2.72e-05	2.18e-05	0.00448058	-0.00573007	0.000583198	9.2e-06	0.000583198	3.43933	-4.43514	27835	28116	0.00498986	0.00469819	0.00484403	-0.31603	0.30392	0	0	0	-60.8027	58.9903	28469	28769	0.00323636	0.00283572	0.00303604	-0.171957	0.159195	0	0	0	-49.4062	46.2378	29473	29804
AAAAACAC	GTGTTTTT	1.81e-05	3.93e-05	2.87e-05	-0.00933434	0.0137254	0.000296716	9.92e-08	0.000296716	-3.61817	5.32827	10314	10393	0.0014189	0.00154296	0.00148093	-0.332738	0.348063	1.24e-229	1.53e-249	1.24e-229	-32.365	33.7524	10608	10561	0.000912637	0.00075628	0.000834459	-0.179626	0.163826	2.67e-151	1.03e-125	1.03e-125	-26.2057	23.8536	10958	10937
AAAAACAG	CTGTTTTT	0.000145836	9.94e-05	0.000122611	-0.0239605	0.0192662	9.7e-25	2.3e-17	2.3e-17	-10.2695	8.47757	12657	13216	0.0011753	0.00113749	0.00115639	-0.274428	0.266377	1.51e-190	1.76e-184	1.76e-184	-29.4525	28.9743	12954	13189	0.000767561	0.000682488	0.000725024	-0.149325	0.138941	1.47e-127	1.24e-113	1.24e-113	-24.031	22.6592	13357	13598
AAAAACAT	ATGTTTTT	0.000218051	0.000176964	0.000197508	-0.0292412	0.0262117	3.63e-36	1.14e-29	1.14e-29	-12.5578	11.3128	12601	12775	0.00139604	0.00137058	0.00138331	-0.294835	0.291535	5.75e-226	7.01e-222	7.01e-222	-32.103	31.8084	13222	13310	0.00107664	0.000909194	0.000992915	-0.173185	0.159011	3.91e-178	9.79e-151	9.79e-151	-28.4654	26.1562	13837	13908
AAAAACCC	GGGTTTTT	6.59e-05	0.000198529	0.000132225	-0.0209077	0.0336307	5.05e-12	4.43e-33	5.05e-12	-6.90424	11.9824	7537	8781	0.00452573	0.0043634	0.00444456	-0.706931	0.681075	0	0	0	-57.8924	56.84	7531	7794	0.00146731	0.0013978	0.00143256	-0.271774	0.259965	4.63e-242	1.1e-230	1.1e-230	-33.2376	32.4396	7740	8031
AAAAACCT	AGGTTTTT	2.66e-05	2.18e-05	2.42e-05	-0.0131138	0.0119134	1.14e-05	7.26e-05	7.26e-05	-4.38785	3.9675	7740	7708	0.000482502	0.000538811	0.000510656	-0.224721	0.239072	2.33e-79	2.11e-88	2.33e-79	-18.8646	19.9355	7951	7893	0.000207283	0.000229228	0.000218255	-0.0990689	0.104762	9.13e-36	2.27e-39	9.13e-36	-12.4846	13.129	8222	8197
AAAAACTA	TAGTTTTT	3.45e-05	0.000195204	0.000114843	-0.011903	0.0299548	5.94e-07	1.49e-32	5.94e-07	-4.99335	11.8816	12095	10743	0.00230085	0.00230026	0.00230055	-0.416163	0.414057	0	0	0	-41.2322	41.2269	10996	11074	0.000471397	0.000453735	0.000462566	-0.125993	0.122894	4.49e-79	3.51e-76	3.51e-76	-18.8298	18.4735	11504	11612
AAAAACTC	GAGTTTTT	0.000154114	0.000169863	0.000161989	-0.0339084	0.0351818	4.73e-26	1.52e-28	4.73e-26	-10.5571	11.0834	6766	6905	0.000861507	0.000877836	0.000869671	-0.324313	0.322164	3.39e-140	8.12e-143	3.39e-140	-25.2121	25.4501	6886	7084	0.000611673	0.000582888	0.000597281	-0.184042	0.176902	4.83e-102	2.49e-97	2.49e-97	-21.4507	20.9396	7111	7308
AAAAACTG	CAGTTTTT	0.000234623	0.000188633	0.000211628	-0.0338061	0.030643	8.75e-39	1.63e-31	1.63e-31	-13.0264	11.6798	10273	10023	0.000552533	0.000804293	0.000678413	-0.213458	0.25664	1.32e-90	5.14e-131	1.32e-90	-20.1879	24.3598	10108	10167	0.000203102	0.000233922	0.000218512	-0.0867556	0.0931802	4.44e-35	3.84e-40	4.44e-35	-12.3581	13.2628	10527	10497
AAAAAGAA	TTCTTTTT	0.0010054	0.0010952	0.0010503	0.0315764	-0.0326285	3.4e-160	2.51e-174	3.4e-160	26.9759	-28.1561	36394	36811	0.00232823	0.00215364	0.00224093	-0.191486	0.18232	0	0	0	-41.4774	39.8884	37914	38303	0.0014662	0.00131237	0.00138929	-0.102567	0.0961562	7.04e-242	1.05e-216	1.05e-216	-33.225	31.4313	39122	39498
AAAAAGAC	GTCTTTTT	2.75e-05	8.33e-06	1.79e-05	-0.0120167	0.00660479	8.28e-06	0.0141178	0.0141178	-4.45781	2.45426	9448	9506	0.000693264	0.000813874	0.000753569	-0.244128	0.265456	3.39e-113	1.49e-132	3.39e-113	-22.6148	24.5046	9622	9605	0.0004183	0.000456512	0.000437406	-0.127826	0.133639	2.24e-70	1.23e-76	2.24e-70	-17.7372	18.53	9909	9945
AAAAAGAG	CTCTTTTT	1.19e-05	0.000100836	5.64e-05	-0.00601181	0.0164928	0.00331513	1.35e-17	0.00331513	-2.93691	8.53919	15418	17275	0.00371779	0.00376923	0.00374351	-0.431728	0.431318	0	0	0	-52.4498	52.8127	15539	15624	0.00145998	0.00138427	0.00142213	-0.182394	0.176295	7.33e-241	1.8e-228	1.8e-228	-33.1543	32.282	16046	16110
AAAAAGAT	ATCTTTTT	8.83e-06	9.36e-06	9.09e-06	-0.00597226	0.00607325	0.0115236	0.00929542	0.0115236	-2.52641	2.601	12215	12557	0.000471527	0.00050706	0.000489293	-0.173324	0.179013	1.35e-77	2.65e-83	1.35e-77	-18.6487	19.3389	12850	13085	0.000375136	0.000439292	0.000407214	-0.103679	0.111507	2.65e-63	8.15e-74	2.65e-63	-16.7967	18.177	13361	13642
AAAAAGCA	TGCTTTTT	0.000190969	0.000122847	0.000156908	-0.0272749	0.0218249	6.95e-32	4.3e-21	4.3e-21	-11.752	9.42532	12718	12761	0.000956579	0.000933944	0.000945262	-0.245965	0.242848	1.88e-155	8.05e-152	8.05e-152	-26.5681	26.2516	13043	13036	0.000705865	0.000675066	0.000690465	-0.141819	0.138952	1.84e-117	2.03e-112	2.03e-112	-23.0443	22.5356	13553	13487
AAAAAGCC	GGCTTTTT	2.68e-06	1.59e-05	9.31e-06	-0.00455375	0.0109512	0.163609	0.000685292	0.163609	-1.39304	3.39541	6212	6251	0.000592134	0.000506005	0.00054907	-0.279822	0.252332	5.8e-97	3.92e-83	3.92e-83	-20.8993	19.3188	6293	6368	0.000241982	0.000244606	0.000243294	-0.120885	0.118656	1.83e-41	6.77e-42	1.83e-41	-13.4894	13.5624	6463	6523
AAAAAGCT	AGCTTTTT	0.000111329	0.00011122	0.000111274	-0.0257743	0.0254898	2.9e-19	3.02e-19	3.02e-19	-8.97257	8.96814	8463	8595	0.00101942	0.000910585	0.000965001	-0.314241	0.29455	1.55e-165	4.51e-148	4.51e-148	-27.4277	25.9209	8683	8780	0.000578361	0.000507118	0.00054274	-0.159305	0.148251	1.37e-96	6.34e-85	6.34e-85	-20.8581	19.5305	8975	9041
AAAAAGGA	TCCTTTTT	3.7e-06	5.49e-06	4.6e-06	-0.00348975	0.00423854	0.102003	0.04626	0.102003	-1.63522	1.99302	14843	14954	0.000355011	0.000411999	0.000383505	-0.137993	0.148058	7.1e-59	4.93e-68	7.1e-59	-16.1804	17.4313	15150	15289	0.000179052	0.000238807	0.000208929	-0.066096	0.0760935	3.99e-31	6.06e-41	3.99e-31	-11.6032	13.4006	15577	15713
AAAAAGGC	GCCTTTTT	3.1e-05	1.28e-05	2.19e-05	0.0155505	-0.00993778	2.19e-06	0.00230675	0.00230675	4.73479	-3.04761	6472	6534	0.000461402	0.000451565	0.000456483	-0.24162	0.239326	5.71e-76	2.17e-74	2.17e-74	-18.4473	18.2495	6640	6615	0.000102899	0.000161103	0.000132001	-0.0772836	0.0962932	1.42e-18	3.59e-28	1.42e-18	-8.79585	11.0062	6780	6811
AAAAAGTA	TACTTTTT	1.13e-06	1.12e-06	1.12e-06	0.00211091	0.00212003	0.366992	0.368614	0.368614	0.902122	0.899074	12497	12244	0.000220634	0.000233641	0.000227138	-0.117959	0.121604	2.96e-37	2.37e-39	2.96e-37	-12.7549	13.1256	13019	12920	0.000253872	0.000261365	0.000257618	-0.0849174	0.0861788	2.04e-43	1.2e-44	2.04e-43	-13.8169	14.0194	13532	13467
AAAAAGTC	GACTTTTT	2.91e-05	3.89e-05	3.4e-05	-0.0134933	0.0155211	4.55e-06	1.13e-07	4.55e-06	-4.5846	5.30452	8077	8108	0.000977108	0.000953034	0.000965071	-0.314854	0.310753	9.55e-159	6.96e-155	6.96e-155	-26.852	26.5188	8308	8258	0.000598417	0.00060825	0.000603334	-0.166101	0.166894	7.14e-100	1.75e-101	7.14e-100	-21.2169	21.3906	8561	8554
AAAAAGTG	CACTTTTT	1.94e-05	1.25e-05	1.59e-05	-0.0102083	0.00794093	0.000181547	0.0026831	0.0026831	-3.74342	3.0019	9329	9944	0.000662119	0.000683971	0.000673045	-0.24144	0.244394	3.38e-108	1.05e-111	3.38e-108	-22.1006	22.4626	9498	9570	0.000130481	0.000110632	0.000120556	-0.0721196	0.066214	3.98e-23	7.5e-20	7.5e-20	-9.90493	9.12038	9823	9874
AAAAATAA	TTATTTTT	2.09e-08	1.71e-05	8.58e-06	0.000149602	-0.0042497	0.902276	0.000430431	0.902276	0.122787	-3.5207	35063	35297	0.00152462	0.00139311	0.00145886	-0.155519	0.147457	1.34e-246	1.7e-225	1.7e-225	-33.5509	32.0692	38761	38720	0.00159958	0.00167543	0.0016375	-0.107133	0.10878	1.05e-263	4.07e-276	1.05e-263	-34.7056	35.5202	40302	40323
AAAAATAC	GTATTTTT	0.00632896	0.00650407	0.00641651	0.0982903	-0.0991382	0	0	0	67.8629	-68.8014	32753	33187	0.000279392	0.000245456	0.000262424	-0.0820006	0.0766246	1.03e-46	2.97e-41	2.97e-41	-14.3536	13.4534	34590	34973	0.000222229	0.000278901	0.000250565	0.0496353	-0.0554243	3.2e-38	1.59e-47	3.2e-38	12.927	-14.4822	35155	35543
AAAAATAG	CTATTTTT	9.7e-08	5.3e-08	7.5e-08	0.000596834	0.000440253	0.791105	0.844729	0.844729	0.264876	0.195848	13437	13564	0.000324877	0.000344729	0.000334803	-0.136842	0.141399	4.96e-54	3.19e-57	4.96e-54	-15.4783	15.9443	14253	14238	0.000356106	0.00034057	0.000348338	-0.095864	0.0939883	3.48e-60	1.23e-57	1.23e-57	-16.365	16.0039	14883	14900
AAAAATAT	ATATTTTT	1e-07	1.09e-07	1.05e-07	-0.000471289	-0.000486368	0.787591	0.779264	0.787591	-0.26944	-0.280278	21838	22097	0.000281158	0.000292999	0.000287078	-0.094998	0.096573	5.34e-47	6.64e-49	5.34e-47	-14.3989	14.699	24616	24803	0.00024884	0.000264223	0.000256531	-0.0594746	0.061244	1.37e-42	4.08e-45	1.37e-42	-13.6793	14.0959	25907	26025
AAAAATCA	TGATTTTT	0.000283665	0.00018518	0.000234422	-0.0281186	0.0226211	1.58e-46	5.72e-31	5.72e-31	-14.3236	11.5724	17575	17789	0.00333396	0.00336307	0.00334851	-0.387273	0.38761	0	0	0	-49.659	49.876	18082	18331	0.00205764	0.00195827	0.00200796	-0.203719	0.197975	0	2.07507571253324e-322	2.07507571253324e-322	-39.3715	38.4071	18868	19158
AAAAATCC	GGATTTTT	0.000116249	9.93e-05	0.000107762	-0.0264949	0.0242365	4.8e-20	2.4e-17	2.4e-17	-9.16869	8.47287	8339	8457	0.000998175	0.00113028	0.00106423	-0.31304	0.331031	3.98e-162	2.53e-183	3.98e-162	-27.1402	28.8822	8540	8604	0.000699708	0.000753789	0.000726749	-0.176447	0.182014	1.88e-116	2.64e-125	1.88e-116	-22.9435	23.8143	8823	8895
AAAAATCT	AGATTTTT	2.85e-05	4.86e-05	3.85e-05	-0.010849	0.0143899	5.74e-06	3.04e-09	5.74e-06	-4.53566	5.92928	12077	11649	0.00022849	0.000207215	0.000217853	-0.12226	0.118352	1.6e-38	4.29e-35	4.29e-35	-12.98	12.3609	12670	12228	0.000171742	0.000138725	0.000155233	-0.0709855	0.064736	6.37e-30	1.74e-24	1.74e-24	-11.3638	10.2131	13233	12815
AAAAATGA	TCATTTTT	4.58e-05	6.58e-05	5.58e-05	-0.0113233	0.013581	8.56e-09	5.26e-12	8.56e-09	-5.75702	6.89855	17481	17556	0.000750118	0.000701193	0.000725655	-0.183185	0.177506	2.54e-122	1.81e-114	1.81e-114	-23.5245	22.7438	18202	18261	0.000448962	0.000497331	0.000473146	-0.0949659	0.10017	2.12e-75	2.54e-83	2.12e-75	-18.376	19.341	18977	19015
AAAAATGC	GCATTTTT	8.85e-07	2.35e-06	1.62e-06	-0.00208767	0.0034049	0.423862	0.192229	0.423862	-0.799739	1.30401	10208	10222	0.000553309	0.000563976	0.000558642	-0.209994	0.212131	9.93e-91	1.92e-92	9.93e-91	-20.2021	20.396	10507	10535	0.000167221	0.000123941	0.000145581	-0.0776054	0.0669263	3.53e-29	4.77e-22	4.77e-22	-11.2132	9.65349	10887	10895
AAAAATGG	CCATTTTT	2.09e-05	1.11e-05	1.6e-05	-0.00975069	0.00721325	0.000102955	0.00455519	0.00455519	-3.88354	2.83692	10913	10649	0.000185222	0.000145122	0.000165172	-0.116751	0.105038	1.51e-31	4.47e-25	4.47e-25	-11.6863	10.344	11255	10900	8.2e-05	8.12e-05	8.16e-05	-0.0523352	0.0529388	4.08e-15	5.61e-15	5.61e-15	-7.85248	7.81268	11626	11255
AAAAATTA	TAATTTTT	0.00587776	0.00594927	0.00591351	0.0781915	-0.0786485	0	0	0	65.3843	-65.7832	45285	45427	0.00106522	0.000919561	0.00099239	-0.130643	0.120975	6.95e-173	1.64e-149	1.64e-149	-28.0378	26.0485	48657	48750	1.68e-05	6.9e-06	1.18e-05	-0.011095	0.00709023	0.000382106	0.0227364	0.0227364	-3.55216	2.27784	49837	49940
AAAAATTC	GAATTTTT	4.76e-06	1.21e-05	8.41e-06	-0.00469938	0.00753292	0.0636094	0.00313645	0.0636094	-1.85491	2.95405	10802	10595	0.00024182	0.000230355	0.000236087	-0.133314	0.130654	1.14e-40	8.03e-39	8.03e-39	-13.3534	13.0329	11329	11198	0.000178827	0.000182212	0.00018052	-0.0767702	0.0779338	4.35e-31	1.21e-31	4.35e-31	-11.5959	11.7052	11825	11663
AAAAATTG	CAATTTTT	1.63e-05	1.06e-05	1.34e-05	0.00847179	-0.00681078	0.000604267	0.00573539	0.00573539	3.42971	-2.76255	11265	11362	0.000213296	0.000194198	0.000203747	-0.121763	0.116027	4.49e-36	5.38e-33	5.38e-33	-12.541	11.9662	11913	11976	8.22e-05	6.6e-05	7.41e-05	-0.0505454	0.0452203	3.78e-15	1.9e-12	1.9e-12	-7.8623	7.04185	12475	12514
AAAACAAA	TTTGTTTT	5.74e-05	5.51e-05	5.63e-05	0.00646571	-0.00630953	1.18e-10	2.72e-10	2.72e-10	6.44151	-6.31394	31905	32433	0.00298452	0.0030786	0.00303156	-0.188543	0.190165	0	0	0	-46.9763	47.7132	32971	33308	0.00257915	0.0027892	0.00268418	-0.118702	0.122446	0	0	0	-44.0909	45.856	34019	34447
AAAACAAC	GTTGTTTT	5.11e-05	5.36e-05	5.23e-05	-0.0162184	0.016572	1.21e-09	4.85e-10	1.21e-09	-6.079	6.22407	9481	9676	0.00140431	0.00148705	0.00144568	-0.344979	0.354005	2.71e-227	1.43e-240	2.71e-227	-32.1981	33.1344	9630	9808	0.000947884	0.0008423	0.000895092	-0.190526	0.179295	4.57e-157	8.65e-140	8.65e-140	-26.7075	25.1748	9983	10149
AAAACAAG	CTTGTTTT	0.000184143	0.000165697	0.00017492	-0.0292486	0.0277599	8.35e-31	6.93e-28	6.93e-28	-11.54	10.9466	10776	10765	0.00307686	0.00269729	0.00288708	-0.490552	0.455172	0	0	0	-47.6997	44.6522	10626	10822	0.0013387	0.00113858	0.00123864	-0.216862	0.198659	5.14e-221	2.86e-188	2.86e-188	-31.7455	29.2737	11078	11232
AAAACAAT	ATTGTTTT	0.000312208	0.000317223	0.000314715	-0.0349904	0.0348076	4.96e-51	8.03e-52	4.96e-51	-15.0272	15.1474	12589	12857	0.000936065	0.000972307	0.000954186	-0.241699	0.244425	3.68e-152	5.63e-158	3.68e-152	-26.2814	26.7858	13149	13305	0.000845371	0.000858009	0.00085169	-0.153806	0.153191	2.72e-140	2.33e-142	2.72e-140	-25.2207	25.4086	13745	13980
AAAACACA	TGTGTTTT	0.000132483	0.000203785	0.000168134	-0.0217387	0.027065	1.27e-22	6.53e-34	1.27e-22	-9.78805	12.14	13851	13747	0.00195128	0.00202762	0.00198945	-0.340689	0.346186	4.52702535188083e-315	0	4.52702535188083e-315	-37.9643	38.7014	13865	13910	0.00159423	0.00151563	0.00155493	-0.207015	0.201348	7.89e-263	5.73e-250	5.73e-250	-34.6474	33.7813	14322	14392
AAAACACC	GGTGTTTT	6.86e-05	9.06e-05	7.96e-05	-0.0251427	0.0287317	1.92e-12	5.79e-16	1.92e-12	-7.04059	8.09376	5477	5509	0.00235963	0.00230756	0.0023336	-0.599426	0.591042	0	0	0	-41.7568	41.2925	5528	5532	0.000830656	0.000709091	0.000769873	-0.240276	0.221387	6.96e-138	5.47e-118	5.47e-118	-25	23.0969	5667	5676
AAAACACT	AGTGTTTT	0.000187324	0.000238395	0.000212859	-0.0332397	0.0370158	2.62e-31	2.22e-39	2.62e-31	-11.6393	13.1307	8496	8739	0.00120726	0.00146111	0.00133419	-0.341978	0.371473	1.12e-195	2.08e-236	1.12e-195	-29.8508	32.8436	8601	8867	0.000713658	0.000759802	0.00073673	-0.176545	0.179794	9.78e-119	2.74e-126	9.78e-119	-23.1712	23.9092	8925	9220
AAAACAGA	TCTGTTTT	0.000282824	0.000303889	0.000293357	-0.0301222	0.0308836	2.15e-46	1.02e-49	2.15e-46	-14.3024	14.8256	15367	15618	0.00504295	0.00453071	0.00478683	-0.517375	0.485662	0	0	0	-61.1269	57.9244	15483	15685	0.00169419	0.0016036	0.0016489	-0.201863	0.194345	3.46e-279	2.31e-264	2.31e-264	-35.7189	34.7493	16017	16228
AAAACAGC	GCTGTTTT	0.000153861	0.000219791	0.000186826	-0.0320164	0.0381545	5.19e-26	1.93e-36	5.19e-26	-10.5484	12.6078	7546	7606	0.0034838	0.00303583	0.00325982	-0.623976	0.580028	0	0	0	-50.7664	47.3796	7501	7581	0.000719468	0.000711524	0.000715496	-0.190908	0.188693	1.09e-119	2.19e-118	2.19e-118	-23.2654	23.1365	7750	7860
AAAACAGG	CCTGTTTT	5.76e-05	3.51e-05	4.63e-05	-0.0196801	0.0150708	1.11e-10	4.68e-07	4.68e-07	-6.45189	5.03909	7505	7763	0.0002386	0.000268863	0.000253731	-0.162705	0.168733	3.78e-40	5.08e-45	3.78e-40	-13.2641	14.0804	7590	7898	0.000144468	0.000103921	0.000124194	-0.0856991	0.071099	1.97e-25	9.64e-19	9.64e-19	-10.4224	8.83939	7757	8052
AAAACAGT	ACTGTTTT	0.000124425	0.000107669	0.000116047	-0.0269958	0.0244345	2.41e-21	1.11e-18	1.11e-18	-9.48569	8.8238	8530	9056	0.000223518	0.000236833	0.000230176	-0.145818	0.148297	1.01e-37	7.27e-40	1.01e-37	-12.838	13.2149	8765	8994	0.000350087	0.000196656	0.000273372	-0.122661	0.090836	3.38e-59	5.09e-34	5.09e-34	-16.2261	12.1603	9088	9324
AAAACATA	TATGTTTT	0.000205134	0.000114457	0.000159795	-0.0313506	0.0228408	4e-34	9.25e-20	9.25e-20	-12.1801	9.09773	10328	10757	0.000823463	0.000706077	0.00076477	-0.247885	0.225519	4.31e-134	2.98e-115	2.98e-115	-24.6487	22.823	11013	11307	0.000868227	0.000722452	0.00079534	-0.169968	0.152096	4.95e-144	3.56e-120	3.56e-120	-25.5596	23.3137	11554	11909
AAAACATC	GATGTTTT	7.47e-05	6.01e-05	6.74e-05	-0.0246344	0.022204	1.96e-13	4.3e-11	4.3e-11	-7.35188	6.59349	6206	6106	0.000318698	0.000345117	0.000331907	-0.204319	0.214521	4.89e-53	2.76e-57	4.89e-53	-15.3303	15.9533	6415	6270	0.000255797	0.000233988	0.000244892	-0.123244	0.118743	9.85e-44	3.75e-40	3.75e-40	-13.8692	13.2647	6628	6500
AAAACATG	CATGTTTT	6.79e-05	6e-05	6.4e-05	-0.0198131	0.0188276	2.43e-12	4.49e-11	4.49e-11	-7.00765	6.58709	8686	8463	0.000497088	0.000488118	0.000492603	-0.216173	0.216609	1.06e-81	2.92e-80	2.92e-80	-19.1477	18.9741	8870	8655	0.000282635	0.000343353	0.000312994	-0.109586	0.122172	3.89e-48	4.29e-58	3.89e-48	-14.5789	16.0692	9202	8977
AAAACATT	AATGTTTT	0.000138028	0.000135092	0.00013656	-0.0230995	0.0226265	1.68e-23	4.9e-23	4.9e-23	-9.99084	9.88399	12798	13069	0.000550999	0.000554679	0.000552839	-0.182933	0.181742	2.33e-90	5.98e-91	2.33e-90	-20.1599	20.2271	13540	13839	0.0003921	0.000457054	0.000424577	-0.103136	0.110334	4.39e-66	1e-76	4.39e-66	-17.1725	18.5409	14200	14489
AAAACCAA	TTGGTTTT	0.000390461	0.000435789	0.000413125	-0.0393614	0.0417183	2.27e-63	1.63e-70	2.27e-63	-16.8059	17.755	12119	12117	0.00144169	0.00143761	0.00143965	-0.307586	0.307137	2.72e-233	1.23e-232	1.23e-232	-32.6243	32.578	12274	12319	0.000782461	0.000773796	0.000778128	-0.152805	0.15176	5.37e-130	1.41e-128	1.41e-128	-24.2633	24.1285	12608	12664
AAAACCAC	GTGGTTTT	0.000315021	0.000341294	0.000328157	-0.0435316	0.0447529	1.79e-51	1.28e-55	1.79e-51	-15.0947	15.7118	8421	8639	0.00340575	0.00369691	0.00355133	-0.585303	0.601389	0	0	0	-50.1926	52.3017	8385	8629	0.00180572	0.00177117	0.00178845	-0.287546	0.281498	1.93e-297	8.7e-292	8.7e-292	-36.878	36.5228	8634	8843
AAAACCAT	ATGGTTTT	0.000276437	0.000300033	0.000288235	-0.0406942	0.0423415	2.19e-45	4.13e-49	2.19e-45	-14.1399	14.7312	8385	8455	0.00265989	0.00261604	0.00263797	-0.5137	0.509003	0	0	0	-44.3407	43.9727	8427	8484	0.000953316	0.000879465	0.00091639	-0.207673	0.198734	5.9e-158	7.17e-146	7.17e-146	-26.784	25.7246	8673	8760
AAAACCCA	TGGGTTTT	2.82e-05	4.69e-05	3.76e-05	-0.0133283	0.0168048	6.23e-06	5.84e-09	6.23e-06	-4.51856	5.82126	8022	8285	0.000797798	0.000774671	0.000786234	-0.286816	0.276742	5.67e-130	2.92e-126	2.92e-126	-24.2612	23.9067	8158	8406	0.000329697	0.000285	0.000307348	-0.124839	0.11377	7.44e-56	1.59e-48	1.59e-48	-15.7463	14.6397	8340	8574
AAAACCCC	GGGGTTTT	2.2e-05	2.09e-05	2.15e-05	0.0133444	-0.0128448	6.54e-05	0.000100214	0.000100214	3.99252	-3.89009	6270	6389	0.000929613	0.00107856	0.00100409	-0.350667	0.37367	3.99e-151	5.02e-175	3.99e-151	-26.1906	28.213	6379	6479	0.000497806	0.000476997	0.000487401	-0.174601	0.16929	2.12e-83	5.44e-80	5.44e-80	-19.3503	18.9413	6452	6540
AAAACCCT	AGGGTTTT	1.9e-05	1.91e-05	1.91e-05	-0.0111555	0.0111276	0.000211227	0.00019986	0.000211227	-3.70522	3.71921	7701	7826	0.00390148	0.00368923	0.00379535	-0.650654	0.631612	0	0	0	-53.7348	52.2472	7757	7800	0.00113748	0.00111105	0.00112426	-0.237955	0.234476	4.33e-188	9.15e-184	9.15e-184	-29.2596	28.9172	7921	7985
AAAACCTA	TAGGTTTT	0.000208307	0.000187333	0.00019782	-0.0389304	0.0366692	1.26e-34	2.61e-31	2.61e-31	-12.274	11.6395	6769	6897	0.00308449	0.00305176	0.00306812	-0.608738	0.60198	0	0	0	-47.7589	47.5041	6830	6943	0.000961771	0.000912251	0.000937011	-0.227506	0.220238	2.44e-159	3.09e-151	3.09e-151	-26.9026	26.2002	7143	7257
AAAACCTC	GAGGTTTT	6.14e-06	4.26e-06	5.2e-06	-0.00786182	0.00656255	0.0350556	0.0793044	0.0793044	-2.10772	1.75474	5026	5017	0.00029827	0.000378527	0.000338399	-0.221485	0.250906	9.43e-50	1.18e-62	9.43e-50	-14.8307	16.7079	5116	5076	0.000141591	0.000111373	0.000126482	-0.103472	0.0920467	5.86e-25	5.66e-20	5.66e-20	-10.318	9.15088	5208	5200
AAAACCTG	CAGGTTTT	9.4e-06	5.77e-06	7.58e-06	-0.00864275	0.00684749	0.00911897	0.0411719	0.0411719	-2.60757	2.0418	6327	6158	0.000346086	0.000378572	0.000362329	-0.210785	0.224624	1.93e-57	1.16e-62	1.93e-57	-15.9757	16.7089	6454	6258	0.000181998	0.000224272	0.000203135	-0.103335	0.116816	1.31e-31	1.48e-38	1.31e-31	-11.6983	12.9863	6621	6423
AAAACCTT	AAGGTTTT	1.2e-05	3.82e-06	7.92e-06	-0.00965693	0.0053535	0.00318728	0.0964422	0.0964422	-2.94908	1.66235	6518	6712	0.000144723	0.000171396	0.00015806	-0.134946	0.14461	5.19e-25	2.56e-29	5.19e-25	-10.3298	11.2417	6675	6855	6.11e-05	6.82e-05	6.47e-05	-0.0591254	0.0614563	1.2e-11	7.98e-13	1.2e-11	-6.77994	7.1617	6880	7077
AAAACTAA	TTAGTTTT	0.000160884	0.000160518	0.000160701	-0.0285561	0.0285125	4.01e-27	4.58e-27	4.58e-27	-10.7865	10.7742	9614	9720	0.000612441	0.000652591	0.000632516	-0.222476	0.229086	3.19e-100	1.14e-106	3.19e-100	-21.2548	21.9409	10057	10228	0.000242682	0.00023064	0.000236661	-0.093578	0.0911965	1.4e-41	1.33e-39	1.33e-39	-13.5089	13.1694	10544	10668
AAAACTAC	GTAGTTTT	0.000283725	0.000283547	0.000283636	-0.0479616	0.047525	1.55e-46	1.65e-46	1.65e-46	-14.3251	14.3206	6219	6315	0.00344537	0.0028817	0.00316353	-0.680082	0.619991	0	0	0	-50.4847	46.1576	6253	6282	0.000587091	0.000465001	0.000526046	-0.188108	0.166298	5.1e-98	5.01e-78	5.01e-78	-21.015	18.7015	6528	6597
AAAACTAT	ATAGTTTT	0.000162977	0.000220453	0.000191715	-0.0315952	0.0362862	1.87e-27	1.52e-36	1.87e-27	-10.8564	12.6268	8106	8220	0.000700277	0.000775751	0.000738014	-0.258967	0.270547	2.54e-114	1.96e-126	2.54e-114	-22.729	23.9234	8553	8661	0.000263876	0.000329702	0.000296789	-0.105913	0.117425	4.65e-45	7.42e-56	4.65e-45	-14.0866	15.7464	9023	9150
AAAACTCA	TGAGTTTT	0.000100813	0.000106927	0.00010387	-0.0248019	0.0257204	1.37e-17	1.45e-18	1.37e-17	-8.53824	8.79337	8162	8087	0.00029548	0.000422336	0.000358908	-0.174287	0.206729	2.65e-49	1.08e-69	2.65e-49	-14.7612	17.6487	8085	8243	0.000164245	0.000186943	0.000175594	-0.0874446	0.0926103	1.09e-28	2.01e-32	1.09e-28	-11.113	11.8562	8335	8508
AAAACTCT	AGAGTTTT	2.42e-05	3.42e-05	2.92e-05	-0.0121893	0.0144672	2.93e-05	6.56e-07	2.93e-05	-4.17882	4.97403	8177	8228	0.000560188	0.000545213	0.000552701	-0.237489	0.233327	7.81e-92	1.98e-89	1.98e-89	-20.3274	20.0537	8318	8406	0.000323663	0.000382529	0.000353096	-0.121635	0.131876	7.25e-55	1.63e-64	7.25e-55	-15.6015	16.9615	8572	8652
AAAACTGA	TCAGTTTT	0.000191165	0.000204877	0.000198021	-0.0306191	0.0316672	6.47e-32	4.39e-34	6.47e-32	-11.758	12.1725	10213	10237	0.000648608	0.000786451	0.000717529	-0.227529	0.250132	4.99e-106	3.75e-128	4.99e-106	-21.8738	24.0879	10459	10497	0.000199254	0.000193192	0.000196223	-0.0846206	0.0833247	1.91e-34	1.89e-33	1.89e-33	-12.2404	12.0527	10871	10888
AAAACTGC	GCAGTTTT	8.23e-05	1.74e-05	4.98e-05	-0.0255034	0.0114088	1.23e-14	0.000394012	0.000394012	-7.71337	3.54408	6216	6341	0.000257609	0.000354069	0.000305839	-0.190008	0.228847	3.29e-43	1.01e-58	3.29e-43	-13.7825	16.1589	5927	5667	3.17e-05	0.000153483	9.26e-05	-0.0449351	0.101993	1.04e-06	6.44e-27	1.04e-06	-4.8834	10.7427	6125	5790
AAAACTGG	CCAGTTTT	0.000379603	0.000342806	0.000361205	-0.044873	0.0430161	1.17e-61	7.41e-56	7.41e-56	-16.5705	15.7466	8619	8420	0.00307486	0.00319621	0.00313554	-0.52922	0.537703	0	0	0	-47.6842	48.6189	8330	8383	0.00075679	0.00066848	0.000712635	-0.17733	0.166087	8.53e-126	2.43e-111	2.43e-111	-23.8617	22.4253	8566	8624
AAAACTTC	GAAGTTTT	4.63e-05	5.4e-05	5.01e-05	-0.0196073	0.0206901	7.16e-09	4.2e-10	7.16e-09	-5.78716	6.24659	6058	6360	0.000240483	0.000321029	0.000280756	-0.180503	0.20318	1.88e-40	2.06e-53	1.88e-40	-13.3164	15.3863	6197	6527	0.000140765	0.000194155	0.00016746	-0.0926117	0.106401	8.02e-25	1.31e-33	8.02e-25	-10.2879	12.0827	6443	6736
AAAAGAAA	TTTCTTTT	0.000852354	0.000659561	0.000755957	0.0247766	-0.0212975	4.17e-136	9.32e-106	9.32e-106	24.8361	-21.8453	39819	41503	0.00222284	0.00212339	0.00217312	-0.159723	0.154198	0	0	0	-40.5256	39.6068	41159	41115	0.00151253	0.00149144	0.00150198	-0.0891124	0.0874072	1.85e-249	5.23e-246	5.23e-246	-33.7465	33.5101	42543	42477
AAAAGAAC	GTTCTTTT	0.000322245	0.000362396	0.00034232	-0.0408449	0.0424662	1.3e-52	6.04e-59	1.3e-52	-15.2669	16.1904	9612	10007	0.0071579	0.00671161	0.00693475	-0.793612	0.757395	0	0	0	-72.9029	70.5778	9407	9731	0.00246244	0.00234701	0.00240472	-0.310664	0.298455	0	0	0	-43.0791	42.0549	9892	10256
AAAAGAAG	CTTCTTTT	1e-05	5.9e-06	7.95e-06	-0.00557577	0.00423118	0.00716096	0.0388537	0.0388537	-2.68927	2.06574	15394	15706	0.00136527	0.00125251	0.00130889	-0.263481	0.250201	4.99e-221	6.17e-203	6.17e-203	-31.7466	30.4057	15714	15967	0.000227521	0.000236798	0.000232159	-0.0724934	0.0734665	4.32e-39	1.3e-40	4.32e-39	-13.08	13.3441	16182	16447
AAAAGAAT	ATTCTTTT	2.7e-05	4.28e-05	3.49e-05	-0.00919471	0.0114973	9.85e-06	2.62e-08	9.85e-06	-4.42049	5.56506	15777	16087	0.00117129	0.00144292	0.00130711	-0.242935	0.270327	6.64e-190	1.73e-233	6.64e-190	-29.4022	32.6382	16266	16310	0.000581486	0.000585189	0.000583337	-0.114714	0.115389	4.22e-97	1.05e-97	4.22e-97	-20.9144	20.9809	16943	16975
AAAAGACA	TGTCTTTT	0.000230804	0.000277021	0.000253912	-0.0290777	0.0317169	3.51e-38	1.77e-45	3.51e-38	-12.9199	14.1548	13327	13285	0.0023042	0.00236214	0.00233317	-0.372341	0.377526	0	0	0	-41.2623	41.7791	13521	13343	0.00123072	0.00128674	0.00125873	-0.183062	0.186631	2.4e-203	1.63e-212	2.4e-203	-30.4366	31.1225	13981	13882
AAAAGACC	GGTCTTTT	3.31e-05	1.59e-05	2.45e-05	-0.0191762	0.0129775	9.84e-07	0.000686404	0.000686404	-4.89478	3.39497	4555	4798	0.000539472	0.000609724	0.000574598	-0.31506	0.328249	1.65e-88	8.7e-100	1.65e-88	-19.9478	21.2076	4579	4777	0.00011127	9.72e-05	0.000104228	-0.0967423	0.0884967	5.89e-20	1.25e-17	1.25e-17	-9.14666	8.54814	4694	4909
AAAAGAGA	TCTCTTTT	5.54e-05	5.14e-05	5.34e-05	-0.0129458	0.0123161	2.43e-10	1.09e-09	1.09e-09	-6.33133	6.09593	16197	16436	0.00214429	0.00226287	0.00220358	-0.327048	0.333503	0	0	0	-39.8016	40.8897	16355	16396	0.00120274	0.00127187	0.0012373	-0.164911	0.168343	9.08e-199	4.44e-210	9.08e-199	-30.0882	30.9418	16888	16940
AAAAGAGC	GCTCTTTT	0.000134119	0.000149099	0.000141609	-0.0319611	0.0331984	6.99e-23	2.95e-25	6.99e-23	-9.84831	10.3838	6599	6776	0.00347321	0.00327873	0.00337597	-0.671853	0.647193	0	0	0	-50.689	49.2445	6444	6534	0.000674448	0.000653687	0.000664068	-0.199026	0.194768	2.56e-112	6.4e-109	6.4e-109	-22.5253	22.1756	6677	6735
AAAAGAGG	CCTCTTTT	0.00014603	0.000112933	0.000129481	-0.0269046	0.0233572	9.04e-25	1.61e-19	1.61e-19	-10.2764	9.03697	10138	10324	0.00152174	0.00163411	0.00157792	-0.353008	0.361792	3.89e-246	3.62e-264	3.89e-246	-33.5191	34.7366	10216	10367	0.000510906	0.000450446	0.000480676	-0.1392	0.128986	1.52e-85	1.21e-75	1.21e-75	-19.6034	18.4064	10335	10528
AAAAGATA	TATCTTTT	8.61e-05	4.18e-05	6.4e-05	-0.0198542	0.0135223	2.96e-15	3.78e-08	3.78e-08	-7.89285	5.50098	10566	11094	0.000527769	0.000488334	0.000508051	-0.194784	0.186424	1.25e-86	2.7e-80	2.7e-80	-19.7301	18.9783	11141	11368	0.000474638	0.000471099	0.000472868	-0.12311	0.121929	1.32e-79	5.03e-79	5.03e-79	-18.8944	18.8238	11691	11967
AAAAGATC	GATCTTTT	0.000108027	6.1e-05	8.45e-05	-0.0324175	0.0241921	9.73e-19	3.1e-11	3.1e-11	-8.83846	6.64207	5136	5199	0.00102214	0.00106363	0.00104288	-0.406178	0.412951	5.68e-166	1.25e-172	5.68e-166	-27.4644	28.0168	5171	5203	0.000485827	0.000572508	0.000529168	-0.187259	0.20295	1.95e-81	1.25e-95	1.95e-81	-19.1159	20.7522	5412	5415
AAAAGATT	AATCTTTT	2.67e-06	1.51e-05	8.86e-06	-0.00382175	0.0089297	0.164532	0.000968582	0.164532	-1.38999	3.29951	9149	9472	0.000135564	0.000184212	0.000159888	-0.10797	0.124952	1.57e-23	2.19e-31	1.57e-23	-9.99758	11.6544	9668	9858	3.92e-05	6.28e-05	5.1e-05	-0.0389868	0.0488105	5.61e-08	6.38e-12	5.61e-08	-5.43072	6.87095	10037	10306
AAAAGCAA	TTGCTTTT	0.000527568	0.000370709	0.000449139	-0.0424746	0.0346992	5.68e-85	2.95e-60	2.95e-60	-19.5363	16.3751	14236	14809	0.00406345	0.00396913	0.00401629	-0.477719	0.467943	0	0	0	-54.8434	54.2005	14411	14540	0.00183207	0.0018461	0.00183908	-0.215607	0.21412	9.41e-302	4.75e-304	9.41e-302	-37.1465	37.2888	14927	15102
AAAAGCAC	GTGCTTTT	9.9e-05	9.7e-05	9.8e-05	-0.0290577	0.0289096	2.66e-17	5.43e-17	5.43e-17	-8.4606	8.37718	5909	5858	0.000320042	0.000379845	0.000349943	-0.211263	0.231318	2.97e-53	7.23e-63	2.97e-53	-15.3626	16.737	6007	5955	0.000301722	0.000302116	0.000301919	-0.138397	0.139122	2.88e-51	2.48e-51	2.88e-51	-15.0632	15.0731	6186	6135
AAAAGCAG	CTGCTTTT	0.000151674	0.000152488	0.000152081	-0.027393	0.0275971	1.15e-25	8.57e-26	1.15e-25	-10.4731	10.5012	10032	9951	0.000458796	0.000488593	0.000473694	-0.194146	0.201444	1.5e-75	2.45e-80	1.5e-75	-18.3951	18.9833	10057	10007	0.000242463	0.000300298	0.00027138	-0.0954585	0.106782	1.52e-41	4.92e-51	1.52e-41	-13.5028	15.0276	10295	10206
AAAAGCAT	ATGCTTTT	0.000169277	0.000160575	0.000164926	-0.0314647	0.0305929	1.88e-28	4.48e-27	4.48e-27	-11.0643	10.7761	8539	8592	0.000210228	0.000277605	0.000243916	-0.141035	0.161676	1.4e-35	1.99e-46	1.4e-35	-12.4504	14.3076	8779	8844	0.000192725	0.000203375	0.00019805	-0.090583	0.0930692	2.26e-33	4.01e-35	2.26e-33	-12.0381	12.3664	9137	9165
AAAAGCCA	TGGCTTTT	4.95e-05	5.73e-05	5.34e-05	-0.0166552	0.0180617	2.17e-09	1.2e-10	2.17e-09	-5.98425	6.43935	8984	8850	0.00174662	0.0015401	0.00164336	-0.403108	0.379863	3.18e-282	4.4e-249	4.4e-249	-35.9146	33.7211	9022	8943	0.000465085	0.000438629	0.000451857	-0.140436	0.137174	4.85e-78	1.05e-73	1.05e-73	-18.7032	18.1632	9273	9146
AAAAGCCC	GGGCTTTT	4.61e-05	4.3e-05	4.45e-05	-0.0228776	0.0222377	7.71e-09	2.51e-08	2.51e-08	-5.77476	5.57287	4436	4401	0.000495051	0.000450741	0.000472896	-0.304218	0.293335	2.25e-81	2.94e-74	2.94e-74	-19.1084	18.2328	4480	4418	0.00016469	0.000164713	0.000164702	-0.11913	0.120344	9.21e-29	9.13e-29	9.21e-29	-11.1281	11.1288	4551	4494
AAAAGCTA	TAGCTTTT	0.000119676	0.000146288	0.000132982	-0.029713	0.033524	1.37e-20	8.23e-25	1.37e-20	-9.30286	10.2855	6618	6437	0.00108599	0.00102251	0.00105425	-0.377158	0.362255	3.23e-176	4.95e-166	4.95e-166	-28.3101	27.4694	6308	6428	0.000541045	0.000573223	0.000557134	-0.178285	0.181946	1.77e-90	9.52e-96	1.77e-90	-20.1736	20.7652	6591	6697
AAAAGCTG	CAGCTTTT	9.22e-05	5.77e-05	7.49e-05	-0.0257155	0.0205059	3.26e-16	1.06e-10	1.06e-10	-8.16334	6.45872	7052	6910	0.000224226	0.000228705	0.000226465	-0.16284	0.165413	7.8e-38	1.48e-38	7.8e-38	-12.8583	12.9861	7131	7000	0.000100594	0.000115142	0.000107868	-0.0739986	0.0797065	3.42e-18	1.35e-20	3.42e-18	-8.69676	9.30447	7259	7106
AAAAGCTT	AAGCTTTT	5.85e-05	3.21e-05	4.53e-05	-0.0198162	0.0147486	7.77e-11	1.43e-06	1.43e-06	-6.50512	4.82138	7486	7457	0.00042553	0.000428486	0.000427008	-0.215615	0.218064	3.3e-70	1.11e-70	3.3e-70	-17.7154	17.7768	7654	7575	0.000278543	0.00029029	0.000284417	-0.117352	0.120712	1.82e-47	2.16e-49	1.82e-47	-14.4729	14.775	7919	7846
AAAAGGAA	TTCCTTTT	4.78e-06	1.51e-05	9.93e-06	0.00331027	0.0061126	0.0629131	0.000958119	0.0629131	1.85981	3.30256	21145	19087	0.000546908	0.000452765	0.000499836	-0.151638	0.139004	1.06e-89	1.39e-74	1.39e-74	-20.0848	18.2737	18940	18555	0.000256043	0.000195901	0.000225972	-0.0699951	0.0616882	8.98e-44	6.78e-34	6.78e-34	-13.8759	12.137	19481	19073
AAAAGGAG	CTCCTTTT	8.24e-05	4.21e-05	6.22e-05	-0.021523	0.0151693	1.18e-14	3.46e-08	3.46e-08	-7.71815	5.51656	8814	9063	9.79e-05	0.000109715	0.0001038	-0.0952895	0.0997433	1.98e-17	2.39e-19	1.98e-17	-8.49517	8.99392	8902	9114	2.18e-05	4.42e-05	3.3e-05	-0.0304512	0.0429167	5.19e-05	8.29e-09	5.19e-05	-4.0467	5.76246	9082	9287
AAAAGGAT	ATCCTTTT	6.14e-05	3.93e-05	5.04e-05	-0.0203581	0.0163066	2.66e-11	9.84e-08	9.84e-08	-6.66417	5.32969	7500	7454	0.000221774	0.000158356	0.000190065	-0.157034	0.132601	1.94e-37	3.26e-27	3.26e-27	-12.7878	10.8055	7573	7573	6.48e-05	4.29e-05	5.38e-05	-0.0570957	0.0463915	2.98e-12	1.36e-08	1.36e-08	-6.97897	5.67829	7836	7845
AAAAGGCA	TGCCTTTT	0.000111845	0.000142996	0.00012742	-0.0244375	0.0273745	2.4e-19	2.74e-24	2.4e-19	-8.99333	10.169	9354	9459	0.00063009	0.000711052	0.000670571	-0.235148	0.247092	4.68e-103	4.73e-116	4.68e-103	-21.5591	22.9033	9472	9624	0.000268523	0.00031371	0.000291117	-0.103687	0.11084	8.04e-46	3.11e-53	8.04e-46	-14.2101	15.3597	9726	9873
AAAAGGCC	NA	1.38e-06	NA	1.38e-06	-0.00381559	NA	0.318458	NA	0.318458	-0.997633	NA	4820	NA	0.000339849	NA	0.000339849	-0.242888	NA	1.94e-56	NA	1.94e-56	-15.831	NA	4892	NA	0.00015915	NA	0.00015915	-0.113183	NA	7.52e-28	NA	7.52e-28	-10.9393	NA	4942	NA
AAAAGTAA	TTACTTTT	2.47e-05	2.04e-05	2.25e-05	-0.0100813	0.00922189	2.34e-05	0.000124892	0.000124892	-4.22956	3.83634	11815	11677	0.000210258	0.000235548	0.000222903	-0.117883	0.124726	1.39e-35	1.17e-39	1.39e-35	-12.4513	13.179	12198	12265	0.000263353	0.000272874	0.000268113	-0.0882203	0.0898053	5.67e-45	1.55e-46	5.67e-45	-14.0726	14.3248	12772	12824
AAAAGTCC	GGACTTTT	0.000150114	9.74e-05	0.000123766	-0.041978	0.0339669	2.04e-25	4.74e-17	4.74e-17	-10.4191	8.39319	4321	4270	0.0005445	0.000586203	0.000565352	-0.322798	0.338524	2.58e-89	5.2e-96	2.58e-89	-20.0406	20.7943	4410	4306	0.000574409	0.000523007	0.000548708	-0.224959	0.21579	6.08e-96	1.59e-87	1.59e-87	-20.7867	19.8343	4494	4431
AAAAGTTA	NA	6.97e-06	NA	6.97e-06	-0.00606331	NA	0.0247958	NA	0.0247958	-2.24457	NA	9387	NA	0.000168785	NA	0.000168785	-0.11793	NA	6.75e-29	NA	6.75e-29	-11.1557	NA	9977	NA	0.000175882	NA	0.000175882	-0.0805763	NA	1.33e-30	NA	1.33e-30	-11.5	NA	10412	NA
AAAATAAA	TTTATTTT	1.45e-05	1.22e-06	7.88e-06	-0.00323515	0.000936455	0.00118271	0.34772	0.34772	-3.24303	0.939021	39173	39382	0.00218747	0.00208676	0.00213712	-0.1522	0.148701	0	0	0	-40.2012	39.2629	42884	42966	0.00210338	0.0024155	0.00225944	-0.100561	0.108168	0	0	0	-39.8075	42.6656	44619	44718
AAAATAAC	GTTATTTT	0.000161359	0.000273324	0.000217341	-0.0278609	0.0362439	3.37e-27	6.78e-45	3.37e-27	-10.8024	14.06	10384	10265	0.00110711	0.000972015	0.00103956	-0.287941	0.270884	1.32e-179	6.27e-158	6.27e-158	-28.5844	26.7818	11072	10881	0.000718376	0.000617425	0.0006679	-0.155207	0.144451	1.65e-119	5.52e-103	5.52e-103	-23.2478	21.5514	11579	11376
AAAATAAG	CTTATTTT	6.11e-05	5.36e-05	5.73e-05	-0.015528	0.014455	3.01e-11	4.87e-10	4.87e-10	-6.6462	6.22324	12567	12695	0.000241622	0.000251937	0.00024678	-0.121794	0.124209	1.23e-40	2.69e-42	1.23e-40	-13.3479	13.6299	13381	13435	0.000269128	0.000237401	0.000253264	-0.0862069	0.0807004	6.39e-46	1.03e-40	1.03e-40	-14.2261	13.3611	13947	14052
AAAATAAT	ATTATTTT	0.000109438	7.71e-05	9.33e-05	-0.0154575	0.0129562	5.8e-19	8.32e-14	8.32e-14	-8.89604	7.46528	21946	22020	0.000605242	0.000570034	0.000587638	-0.140079	0.136315	4.56e-99	2.05e-93	2.05e-93	-21.1295	20.5053	24468	24355	0.000618048	0.000620973	0.000619511	-0.0944664	0.0949651	4.37e-103	1.45e-103	4.37e-103	-21.5623	21.6133	25670	25518
AAAATACA	TGTATTTT	0.00585662	0.00611231	0.00598447	0.0893453	-0.0914983	0	0	0	65.266	-66.684	36473	36679	0.000452814	0.000376985	0.0004149	-0.0987254	0.0903523	1.37e-74	2.08e-62	2.08e-62	-18.2747	16.6739	38475	38669	9.53e-05	0.00011981	0.00010758	0.0307131	-0.0345303	2.52e-17	2.29e-21	2.52e-17	8.467	-9.49123	39183	39379
AAAATACC	GGTATTTT	0.000253784	0.000261216	0.0002575	-0.0429544	0.0429349	8.24e-42	5.53e-43	8.24e-42	-13.548	13.745	6786	7089	0.00169227	0.00168836	0.00169032	-0.448156	0.441338	1.67e-273	7.1e-273	7.1e-273	-35.3505	35.3096	6982	7241	0.000840129	0.000785829	0.000812979	-0.211136	0.202164	1.96e-139	1.51e-130	1.51e-130	-25.1423	24.3155	7254	7527
AAAATACT	AGTATTTT	0.000100695	0.000128081	0.000114388	-0.0211314	0.0240839	1.43e-17	6.35e-22	1.43e-17	-8.53325	9.62403	11214	11059	0.00107166	0.00106357	0.00106762	-0.277233	0.277119	6.44e-174	1.28e-172	1.28e-172	-28.1224	28.0161	11500	11520	0.00068223	0.000561235	0.000621732	-0.147858	0.134575	1.36e-113	8.73e-94	8.73e-94	-22.6549	20.5468	12064	12071
AAAATAGA	TCTATTTT	5.08e-05	7.08e-05	6.08e-05	-0.0137131	0.016137	1.36e-09	8.23e-13	1.36e-09	-6.05991	7.15736	13273	13406	0.000706039	0.000785844	0.000745942	-0.203208	0.214416	3.02e-115	4.7e-128	3.02e-115	-22.8223	24.0786	13972	14029	0.000633875	0.000723975	0.000678925	-0.128469	0.137285	1.12e-105	2e-120	1.12e-105	-21.8368	23.3382	14682	14744
AAAATAGC	GCTATTTT	2.54e-06	4.1e-08	1.29e-06	-0.004303	-0.000545044	0.175271	0.86332	0.86332	-1.35546	-0.172149	6914	6937	0.000185642	0.000142745	0.000164193	-0.146829	0.129237	1.29e-31	1.08e-24	1.08e-24	-11.6996	10.259	7230	7173	0.000160623	9.95e-05	0.000130069	-0.0919575	0.0727026	4.3e-28	5.16e-18	5.16e-18	-10.9898	8.64998	7471	7405
AAAATATA	TATATTTT	2.15e-05	7.61e-07	1.11e-05	-0.0072542	0.00136999	8.16e-05	0.458301	0.458301	-3.93979	0.741648	19230	19091	0.000318492	0.000341725	0.000330108	-0.10397	0.108187	5.28e-53	9.7e-57	5.28e-53	-15.3254	15.8747	22258	22073	0.000317258	0.000321102	0.00031918	-0.0688823	0.0697274	8.15e-54	1.91e-54	8.15e-54	-15.4463	15.5396	23521	23228
AAAATATC	GATATTTT	6.12e-05	0.000131829	9.65e-05	-0.018221	0.0258318	2.9e-11	1.61e-22	2.9e-11	-6.65142	9.76388	9219	9831	0.000165929	0.000205617	0.000185773	-0.118689	0.130992	1.95e-28	7.76e-35	1.95e-28	-11.0609	12.3131	9798	9889	0.000156661	0.000252142	0.000204402	-0.0769987	0.0968163	1.93e-27	3.92e-43	1.93e-27	-10.8533	13.7698	10294	10380
AAAATATT	AATATTTT	2.94e-05	6.67e-05	4.8e-05	-0.00805422	0.0120281	4.08e-06	3.85e-12	4.08e-06	-4.60726	6.94287	21886	22124	0.000183684	0.000227069	0.000205377	-0.0771794	0.0851732	2.67e-31	2.72e-38	2.67e-31	-11.6377	12.9396	24445	24663	0.000160056	0.00014523	0.000152643	-0.0479836	0.0453594	5.33e-28	1.47e-25	1.47e-25	-10.9703	10.4498	25786	26020
AAAATCAA	TTGATTTT	0.000827719	0.000707295	0.000767507	-0.0534336	0.0481664	3.15e-132	2.85e-113	2.85e-113	-24.4742	22.6226	14114	14817	0.00414281	0.0048223	0.00448256	-0.48177	0.508454	0	0	0	-55.3785	59.7681	14466	15138	0.00282998	0.00298186	0.00290592	-0.265362	0.266999	0	0	0	-46.1909	47.4178	15218	15865
AAAATCAC	GTGATTTT	0.000282764	0.000218571	0.000250667	-0.0412099	0.0364279	2.19e-46	3.01e-36	3.01e-36	-14.3008	12.5728	8222	8264	0.00153108	0.00137372	0.0014524	-0.386089	0.368644	1.23e-247	2.19e-222	2.19e-222	-33.622	31.8449	8447	8450	0.00115252	0.000907621	0.00103007	-0.225776	0.20195	1.49e-190	1.77e-150	1.77e-150	-29.4527	26.1336	8715	8720
AAAATCAG	CTGATTTT	4.18e-06	3.48e-06	3.83e-06	-0.00445185	0.00403818	0.0821423	0.112698	0.112698	-1.73839	1.58619	10540	10684	0.000454001	0.000509477	0.000481739	-0.188373	0.198679	8.81e-75	1.08e-83	8.81e-75	-18.2987	19.385	10666	10783	0.000354044	0.000433709	0.000393877	-0.111551	0.122937	7.58e-60	6.69e-73	7.58e-60	-16.3175	18.061	11090	11206
AAAATCAT	ATGATTTT	5.68e-05	5.8e-05	5.74e-05	-0.0166101	0.0169631	1.47e-10	9.42e-11	1.47e-10	-6.40841	6.47603	10242	10096	0.000347166	0.00027333	0.000310248	-0.164694	0.14687	1.29e-57	9.7e-46	9.7e-46	-16.0006	14.197	10606	10473	0.000333518	0.000244752	0.000289135	-0.108011	0.0928635	1.76e-56	6.41e-42	6.41e-42	-15.8373	13.5664	11101	10983
AAAATCCA	TGGATTTT	0.000158473	7.91e-05	0.000118775	-0.0295293	0.0211917	9.65e-27	3.98e-14	3.98e-14	-10.7053	7.56187	8985	8755	0.000406496	0.000423743	0.000415119	-0.191183	0.197649	3.77e-67	6.39e-70	3.77e-67	-17.3144	17.6781	9172	8942	0.000533559	0.000495649	0.000514604	-0.147588	0.144046	2.97e-89	4.79e-83	4.79e-83	-20.0335	19.3083	9462	9229
AAAATCCT	AGGATTTT	0.000137418	0.000144952	0.000141185	-0.0282714	0.0289538	2.1e-23	1.34e-24	2.1e-23	-9.9687	10.2384	8679	8718	0.00158361	0.00171377	0.00164869	-0.389862	0.404007	4.59e-256	5.95e-277	4.59e-256	-34.1948	35.5747	8752	8807	0.000965568	0.000998456	0.000982012	-0.205286	0.207785	5.83e-160	2.42e-165	5.83e-160	-26.9557	27.4113	9026	9095
AAAATCTA	TAGATTTT	0.00012984	9.89e-05	0.000114381	-0.0272379	0.0239431	3.34e-22	2.73e-17	2.73e-17	-9.68994	8.45772	8768	8606	0.0011403	0.00112423	0.00113227	-0.325308	0.322547	6.24e-185	2.36e-182	2.36e-182	-29.0101	28.8048	8972	8948	0.000439335	0.00044078	0.000440057	-0.135059	0.134771	8.02e-74	4.65e-74	8.02e-74	-18.1778	18.2077	9384	9423
AAAATCTC	GAGATTTT	5.04e-05	0.000126439	8.84e-05	-0.0179715	0.0284744	1.58e-09	1.16e-21	1.58e-09	-6.03648	9.56215	7781	7794	4.55e-05	5.65e-05	5.1e-05	-0.06931	0.0772814	7.07e-09	1.1e-10	7.07e-09	-5.7893	6.45203	7881	7872	9.68e-05	9.93e-05	9.8e-05	-0.067997	0.068884	1.47e-17	5.7e-18	1.47e-17	-8.52941	8.63862	8165	8163
AAAATGAA	TTCATTTT	0.00018285	0.000130317	0.000156584	-0.0217336	0.0181808	1.34e-30	2.8e-22	2.8e-22	-11.4994	9.70772	18789	19104	0.000506312	0.000566584	0.000536448	-0.14432	0.1518	3.49e-83	7.34e-93	3.49e-83	-19.3246	20.4431	19555	19856	0.000397353	0.000480105	0.000438729	-0.0854932	0.0935985	6.06e-67	1.68e-80	6.06e-67	-17.2872	19.003	20456	20693
AAAATGAC	GTCATTTT	2.76e-05	5.31e-05	4.03e-05	-0.0137396	0.0189072	8.01e-06	5.76e-10	8.01e-06	-4.46493	6.19688	7359	7432	0.000216023	0.000214899	0.000215461	-0.154893	0.153164	1.63e-36	2.48e-36	2.48e-36	-12.6209	12.588	7565	7634	9.31e-05	8.98e-05	9.15e-05	-0.068327	0.066552	6.02e-17	2.05e-16	2.05e-16	-8.36502	8.21908	7835	7926
AAAATGAT	ATCATTTT	0.000103433	8.15e-05	9.25e-05	-0.0210631	0.0187352	5.23e-18	1.63e-14	1.63e-14	-8.64846	7.67671	11588	11523	0.000374075	0.00034936	0.000361718	-0.160093	0.156187	6.12e-62	5.74e-58	5.74e-58	-16.6094	16.0511	12112	11910	0.000180181	0.000204865	0.000192523	-0.0743856	0.0800181	2.6e-31	2.28e-35	2.6e-31	-11.6397	12.4116	12653	12464
AAAATGCT	AGCATTTT	8.86e-05	0.000109804	9.92e-05	-0.019294	0.0215136	1.22e-15	5.07e-19	1.22e-15	-8.00279	8.91087	11887	11908	0.00030845	0.000315413	0.000311931	-0.145052	0.147203	2.17e-51	1.65e-52	2.17e-51	-15.0818	15.2511	12186	12182	4e-05	3.58e-05	3.79e-05	-0.0352235	0.033481	4.12e-08	2.11e-07	2.11e-07	-5.48579	5.18949	12549	12522
AAAATGGA	TCCATTTT	3.72e-05	4.43e-05	4.08e-05	-0.0122201	0.0134899	2.11e-07	1.53e-08	2.11e-07	-5.18955	5.65824	12141	11914	0.000134643	0.00017245	0.000153546	-0.0943019	0.10816	2.21e-23	1.73e-29	2.21e-23	-9.96354	11.2762	12315	12102	5e-05	4.45e-05	4.73e-05	-0.0389607	0.037155	8.67e-10	7.22e-09	7.22e-09	-6.13214	5.78581	12716	12474
AAAATGGC	GCCATTTT	8.64e-05	6.66e-05	7.65e-05	-0.0247494	0.0215408	2.75e-15	3.92e-12	3.92e-12	-7.90212	6.94002	7115	7191	0.00156811	0.00171742	0.00164276	-0.428957	0.44538	1.41e-253	1.54e-277	1.41e-253	-34.0268	35.6126	7161	7227	0.000239598	0.00029218	0.000265889	-0.113174	0.123762	4.5e-41	1.06e-49	4.5e-41	-13.4228	14.8231	7368	7457
AAAATTAA	TTAATTTT	5.7e-05	3.83e-05	4.77e-05	-0.011109	0.00904837	1.36e-10	1.41e-07	1.41e-07	-6.42074	5.26422	21412	21658	0.00211107	0.00198267	0.00204687	-0.261593	0.253186	0	4.14224637473301e-320	4.14224637473301e-320	-39.4914	38.2691	23432	23543	0.00139466	0.00141409	0.00140438	-0.141806	0.142838	3.58e-230	2.37e-233	3.58e-230	-32.4031	32.6284	24609	24722
AAAATTAC	NA	1.18e-06	NA	1.18e-06	-0.00263129	NA	0.35484	NA	0.35484	-0.925243	NA	8539	NA	0.000147687	NA	0.000147687	-0.116358	NA	1.72e-25	NA	1.72e-25	-10.4351	NA	9037	NA	8.75e-05	NA	8.75e-05	-0.0600396	NA	5.04e-16	NA	5.04e-16	-8.11082	NA	9422	NA
AAAATTAG	CTAATTTT	0.0101478	0.0104849	0.0103163	0.122574	-0.12402	0	0	0	86.0973	-87.5302	34156	34512	0.000162544	0.000102872	0.000132708	-0.0617036	0.0488533	6.87e-28	3.07e-18	3.07e-18	-10.9475	8.70888	36021	36394	0.000284621	0.000355156	0.000319889	0.0555493	-0.0618117	1.84e-48	4.98e-60	1.84e-48	14.63	-16.3432	36437	36746
AAAATTCA	TGAATTTT	0.000163604	0.00015934	0.000161472	-0.0249895	0.0247355	1.49e-27	7.04e-27	7.04e-27	-10.8773	10.7346	12942	12992	0.00120955	0.00104608	0.00112781	-0.272256	0.25351	4.83e-196	8.17e-170	8.17e-170	-29.879	27.7845	13424	13498	0.000838716	0.000846334	0.000842525	-0.151903	0.152879	3.34e-139	1.89e-140	3.34e-139	-25.1211	25.235	13995	14064
AAAATTGA	TCAATTTT	0.000159001	0.000150108	0.000154555	-0.0268642	0.0257924	7.96e-27	2.04e-25	2.04e-25	-10.7232	10.4189	10749	10921	0.00471116	0.00512241	0.00491678	-0.595611	0.614303	0	0	0	-59.072	61.6091	10853	11034	0.00204275	0.00212548	0.00208412	-0.260518	0.263133	0	0	0	-39.2284	40.0166	11500	11634
AAACAAAA	TTTTGTTT	5.77e-05	7.86e-05	6.81e-05	0.00657129	-0.00766125	1.06e-10	4.73e-14	1.06e-10	6.45833	-7.53926	30166	30661	0.00256806	0.00260629	0.00258717	-0.177334	0.178045	0	0	0	-43.5665	43.8905	31124	31450	0.00233817	0.00257587	0.00245702	-0.114497	0.119681	0	0	0	-41.9754	44.0627	32159	32559
AAACAAAC	GTTTGTTT	1.15e-05	1.29e-05	1.22e-05	0.00395287	-0.00419045	0.00387392	0.00221353	0.00387392	2.88826	-3.05999	13367	13418	0.00160101	0.00139193	0.00149647	-0.189889	0.176813	7.4e-259	2.62e-225	2.62e-225	-34.3825	32.0556	13504	13593	0.00102466	0.00113585	0.00108025	-0.102963	0.108193	1.25e-169	8e-188	1.25e-169	-27.769	29.2386	13893	13968
AAACAAAG	CTTTGTTT	8.89e-05	0.000122769	0.000105824	-0.0202303	0.0234745	1.09e-15	4.42e-21	1.09e-15	-8.01692	9.42234	10780	11024	0.000823843	0.00072705	0.000775446	-0.249144	0.231367	3.75e-134	1.28e-118	1.28e-118	-24.6543	23.1597	10996	11192	0.000600313	0.000661302	0.000630808	-0.14342	0.148826	3.49e-100	3.63e-110	3.49e-100	-21.2505	22.3045	11297	11515
AAACAAAT	ATTTGTTT	0.000444572	0.00047629	0.000460431	-0.0375019	0.0385132	6.74e-72	6.79e-77	6.74e-72	-17.9331	18.5621	15564	15858	0.00456459	0.00490513	0.00473486	-0.48294	0.496677	0	0	0	-58.1415	60.2817	16056	16315	0.00228174	0.001897	0.00208937	-0.228634	0.206867	0	2.21553743749652e-312	2.21553743749652e-312	-41.4646	37.8003	16772	17042
AAACAACA	TGTTGTTT	8.09e-05	5.69e-05	6.89e-05	-0.018645	0.0155424	2.07e-14	1.42e-10	1.42e-10	-7.64654	6.41343	11411	11602	0.0019098	0.00173137	0.00182058	-0.367892	0.348933	0	8.9e-280	8.9e-280	-37.5579	35.7572	11553	11680	0.0013197	0.00125357	0.00128663	-0.206057	0.200002	6.62e-218	4.37e-207	4.37e-207	-31.519	30.7182	11937	12047
AAACAACC	GGTTGTTT	0.000156979	0.000149165	0.000153072	-0.0381462	0.0370025	1.66e-26	2.88e-25	2.88e-25	-10.6547	10.3861	5454	5490	0.00232471	0.00219445	0.00225958	-0.59874	0.582232	0	0	0	-41.446	40.2654	5466	5434	0.00071966	0.000638334	0.000678997	-0.224735	0.210955	1.02e-119	2.09e-106	2.09e-106	-23.2685	21.9135	5628	5630
AAACAACT	AGTTGTTT	9.24e-05	0.000105293	9.88e-05	-0.0264091	0.0283144	3.04e-16	2.65e-18	3.04e-16	-8.17199	8.72589	6642	6591	0.00069478	0.000646989	0.000670884	-0.293936	0.283874	1.94e-113	9.08e-106	9.08e-106	-22.6395	21.8465	6708	6708	0.000339317	0.00020939	0.000274354	-0.137595	0.108599	1.97e-57	4.11e-36	4.11e-36	-15.9744	12.548	7001	6950
AAACAAGA	TCTTGTTT	7.7e-05	5.96e-05	6.83e-05	-0.0206528	0.0182329	8.44e-14	5.26e-11	5.26e-11	-7.46346	6.56361	8975	8925	0.00126571	0.00104601	0.00115586	-0.342881	0.30981	4.71e-205	8.41e-170	8.41e-170	-30.5657	27.7835	8872	9025	0.000616478	0.000500141	0.000558309	-0.161043	0.144385	7.89e-103	8.81e-84	8.81e-84	-21.5348	19.3956	9185	9313
AAACAAGC	GCTTGTTT	0.000150381	0.000181265	0.000165823	-0.0385415	0.0419982	1.85e-25	2.38e-30	1.85e-25	-10.4284	11.4494	5130	5182	0.00220469	0.00204445	0.00212457	-0.603094	0.576354	0	0	0	-40.3595	38.862	5118	5168	0.000579533	0.000552206	0.000565869	-0.207636	0.201439	8.82e-97	2.63e-92	2.63e-92	-20.8792	20.3807	5311	5357
AAACAAGT	ACTTGTTT	0.000118961	9.18e-05	0.000105369	-0.0312713	0.0274621	1.78e-20	3.75e-16	3.75e-16	-9.27506	8.14654	6118	6107	0.000340779	0.000270583	0.000305681	-0.214683	0.19091	1.38e-56	2.68e-45	2.68e-45	-15.8527	14.1254	6192	6212	0.00036125	0.000323796	0.000342523	-0.148551	0.140745	5e-61	6.9e-55	6.9e-55	-16.4828	15.6047	6420	6403
AAACAATA	TATTGTTT	0.000179983	0.000141778	0.00016088	-0.0318545	0.027862	3.8e-30	4.27e-24	4.27e-24	-11.4089	10.1256	8785	9037	0.000565739	0.000552215	0.000558977	-0.223624	0.218794	1e-92	1.49e-90	1.49e-90	-20.4279	20.1821	9318	9506	0.000504225	0.000579307	0.000541766	-0.141102	0.149447	1.89e-84	9.6e-97	1.89e-84	-19.4747	20.8751	9763	9989
AAACAATC	GATTGTTT	0.000291246	0.000258997	0.000275121	-0.0529264	0.0493156	1.01e-47	1.24e-42	1.24e-42	-14.5138	13.6865	5203	5286	0.000338954	0.000517179	0.000428067	-0.231236	0.285688	2.7e-56	6.29e-85	2.7e-56	-15.8102	19.531	5303	5320	0.000263087	0.000300705	0.000281896	-0.136623	0.145953	6.27e-45	4.22e-51	6.27e-45	-14.0655	15.0378	5509	5551
AAACAATG	CATTGTTT	8.98e-05	0.000100191	9.5e-05	-0.0248435	0.0261169	7.64e-16	1.71e-17	7.64e-16	-8.05994	8.51185	7317	7306	0.000299392	0.000307588	0.00030349	-0.182777	0.183933	6.22e-50	2.99e-51	6.22e-50	-14.8586	15.0606	7500	7457	0.000148856	0.000152366	0.000150611	-0.0866034	0.0872114	3.72e-26	9.84e-27	3.72e-26	-10.5795	10.7035	7777	7719
AAACAATT	AATTGTTT	0.000166294	0.000137651	0.000151972	-0.0303164	0.027396	5.58e-28	1.93e-23	1.93e-23	-10.9663	9.97715	9067	9182	0.000359929	0.000404943	0.000382436	-0.177435	0.187392	1.15e-59	6.7e-67	1.15e-59	-16.2922	17.2813	9531	9636	0.000278303	0.000348687	0.000313495	-0.10437	0.116207	2e-47	5.73e-59	2e-47	-14.4667	16.1936	9959	10059
AAACACAA	TTGTGTTT	8.37e-05	9.75e-05	9.06e-05	-0.0197908	0.0215995	7.36e-15	4.67e-17	7.36e-15	-7.77834	8.39505	10440	10388	0.00104929	0.00117385	0.00111157	-0.283404	0.303445	2.5e-170	2.58e-190	2.5e-170	-27.8271	29.4343	10679	10541	0.000972367	0.00106058	0.00101647	-0.183348	0.193773	4.5e-161	1.66e-175	4.5e-161	-27.0505	28.2521	11067	10934
AAACACAC	GTGTGTTT	0.000109213	9.97e-05	0.000104473	-0.0232845	0.0239981	6.3e-19	2.03e-17	2.03e-17	-8.88688	8.49232	8795	8187	0.00113065	0.00104138	0.00108601	-0.337136	0.319199	2.21e-183	4.65e-169	4.65e-169	-28.8869	27.7219	7770	8006	0.0011049	0.000912079	0.00100849	-0.225438	0.203698	9.27e-183	3.3e-151	3.3e-151	-28.8371	26.1977	7949	8180
AAACACAG	CTGTGTTT	0.000162432	0.000164901	0.000163667	-0.0310354	0.0314018	2.28e-27	9.26e-28	2.28e-27	-10.8382	10.9203	8176	8355	0.000427495	0.000478223	0.000452859	-0.204053	0.21686	1.6e-70	1.13e-78	1.6e-70	-17.7562	18.7807	8301	8465	0.000356413	0.000369036	0.000362724	-0.126315	0.128932	3.1e-60	2.65e-62	3.1e-60	-16.372	16.6596	8473	8657
AAACACAT	ATGTGTTT	0.000212851	0.000270599	0.000241725	-0.0349498	0.039267	2.41e-35	1.82e-44	2.41e-35	-12.4071	13.9898	8661	8762	0.00172917	0.00160385	0.00166651	-0.404577	0.385989	2e-279	2.59e-259	2.59e-259	-35.7345	34.4131	8802	8902	0.00126343	0.00120138	0.00123241	-0.230941	0.224061	1.07e-208	1.51e-198	1.51e-198	-30.8389	30.0712	9179	9278
AAACACCA	TGGTGTTT	0.000127758	0.000156346	0.000142052	-0.0309888	0.0341698	7.14e-22	2.1e-26	7.14e-22	-9.61192	10.6332	6712	6748	0.00243162	0.002174	0.00230281	-0.547956	0.516709	0	0	0	-42.3905	40.077	6810	6827	0.000903228	0.000751517	0.000827372	-0.226015	0.20533	9.27e-150	6.22e-125	6.22e-125	-26.0702	23.7784	6965	7002
AAACACCT	AGGTGTTT	6.25e-05	6.22e-05	6.24e-05	-0.0245797	0.0243301	1.77e-11	1.97e-11	1.97e-11	-6.72355	6.70844	5244	5330	0.00105795	0.0010804	0.00106918	-0.410381	0.41289	1.02e-171	2.55e-175	1.02e-171	-27.9418	28.2371	5294	5351	0.000452759	0.000488601	0.00047068	-0.181367	0.187972	5.07e-76	6.84e-82	5.07e-76	-18.4536	19.1705	5433	5474
AAACACTA	TAGTGTTT	0.000121856	0.000118005	0.00011993	-0.0366495	0.0350947	6.18e-21	2.53e-20	2.53e-20	-9.38722	9.23768	4604	4834	0.000224936	0.000207675	0.000216306	-0.199186	0.188182	5.99e-38	3.62e-35	3.62e-35	-12.8787	12.3746	4770	4930	0.000161181	0.000130135	0.000145658	-0.113244	0.0999492	3.48e-28	4.53e-23	4.53e-23	-11.0088	9.89177	4948	5131
AAACACTC	GAGTGTTT	0.000254131	1.99e-05	0.000137004	0.0345995	0.0146664	7.26e-42	0.000150021	0.000150021	13.5573	3.79105	7577	4694	0.000735162	0.000834308	0.000784735	-0.384279	0.397199	6.39e-120	7.84e-136	6.39e-120	-23.2886	24.8106	4156	4476	0.000332636	0.000350538	0.000341587	-0.174772	0.173699	2.45e-56	2.85e-59	2.45e-56	-15.8163	16.2365	4264	4608
AAACACTG	CAGTGTTT	8.2e-05	0.000133568	0.000107761	-0.0229326	0.029767	1.38e-14	8.55e-23	1.38e-14	-7.69824	9.82807	7903	7621	0.00025277	0.000351172	0.000301971	-0.166003	0.19576	1.98e-42	2.94e-58	1.98e-42	-13.6524	16.0927	7754	7727	0.000136528	0.000213643	0.000175086	-0.0825426	0.103178	4e-24	8.23e-37	4e-24	-10.1319	12.6748	7932	7928
AAACACTT	NA	4.09e-05	NA	4.09e-05	-0.016714	NA	5.46e-08	NA	5.46e-08	-5.43556	NA	7298	NA	0.000173281	NA	0.000173281	-0.141335	NA	1.27e-29	NA	1.27e-29	-11.3033	NA	7207	NA	0.000180157	NA	0.000180157	-0.0970972	NA	2.63e-31	NA	2.63e-31	-11.639	NA	7427	NA
AAACAGAA	TTCTGTTT	0.000265795	0.000219258	0.000242527	-0.02863	0.0262529	1.05e-43	2.34e-36	2.34e-36	-13.865	12.5925	15935	15641	0.00179975	0.00178253	0.00179114	-0.309447	0.303791	9.46e-291	5.47e-288	5.47e-288	-36.4577	36.2826	15368	15760	0.00138107	0.00131454	0.00134781	-0.18258	0.175875	6e-228	4.62e-217	4.62e-217	-32.2446	31.4573	15861	16240
AAACAGAC	GTCTGTTT	0.000255262	0.000342591	0.000298927	-0.043349	0.0498854	4.81e-42	8.01e-56	4.81e-42	-13.5874	15.7416	6802	6966	0.00277441	0.00259598	0.0026852	-0.586578	0.571632	0	0	0	-45.2878	43.8034	6730	6708	0.000929658	0.000870774	0.000900216	-0.228443	0.223061	4.39e-154	1.9e-144	1.9e-144	-26.4492	25.5971	6954	6919
AAACAGAG	CTCTGTTT	0.000183966	0.000515346	0.000349656	-0.0311367	0.0481799	8.9e-31	4.78e-83	8.9e-31	-11.5344	19.3085	9519	11188	0.0020502	0.0020893	0.00206975	-0.423613	0.429068	0	0	0	-38.9168	39.2868	9551	9467	0.000482858	0.00047506	0.000478959	-0.139128	0.138646	5.96e-81	1.13e-79	1.13e-79	-19.0574	18.9028	9760	9657
AAACAGAT	ATCTGTTT	3.17e-05	5.09e-05	4.13e-05	-0.0146279	0.0184099	1.72e-06	1.33e-09	1.72e-06	-4.78414	6.06427	7453	7564	0.000428908	0.000470317	0.000449612	-0.217751	0.225635	9.46e-71	2.11e-77	9.46e-71	-17.7856	18.6247	7585	7752	0.00013563	0.000227635	0.000181633	-0.0823724	0.105866	5.63e-24	4.14e-39	5.63e-24	-10.0985	13.0833	7850	7984
AAACAGCA	TGCTGTTT	0.000229816	0.00032514	0.000277478	-0.0366334	0.0434251	5.03e-38	4.53e-53	5.03e-38	-12.8922	15.3353	8566	8660	0.00334345	0.00280858	0.00307601	-0.569589	0.523317	0	0	0	-49.7298	45.5666	8588	8574	0.000756473	0.000834093	0.000795283	-0.182572	0.192006	9.61e-126	1.91e-138	9.61e-126	-23.8567	25.0517	8866	8861
AAACAGCC	GGCTGTTT	1.8e-05	9.49e-06	1.37e-05	-0.0140277	0.0102118	0.000309558	0.00880018	0.00880018	-3.60718	2.61973	4571	4583	0.000335259	0.00036279	0.000349024	-0.246261	0.255378	1.06e-55	3.99e-60	1.06e-55	-15.7237	16.3568	4603	4667	0.000112416	7.49e-05	9.37e-05	-0.0969718	0.0790694	3.81e-20	6.14e-14	6.14e-14	-9.19366	7.50531	4661	4710
AAACAGTC	GACTGTTT	6.17e-05	5.2e-05	5.69e-05	-0.0279719	0.0266643	2.43e-11	8.59e-10	8.59e-10	-6.6779	6.13373	3983	3692	0.000198722	0.000225668	0.000212195	-0.210337	0.227653	1e-33	4.57e-38	1e-33	-12.1048	12.8996	3788	3673	0.000218588	0.000185502	0.000202045	-0.148736	0.139387	1.27e-37	3.47e-32	3.47e-32	-12.8206	11.8104	3902	3774
AAACATAA	TTATGTTT	0.000105075	0.000173905	0.00013949	-0.0238114	0.0305063	2.87e-18	3.48e-29	2.87e-18	-8.71688	11.2146	9139	9271	0.000611038	0.000641209	0.000626124	-0.227103	0.231772	5.36e-100	7.68e-105	5.36e-100	-21.2305	21.7486	9714	9838	0.000716934	0.00061712	0.000667027	-0.164741	0.151966	2.85e-119	6.19e-103	6.19e-103	-23.2244	21.5461	10145	10293
AAACATAC	GTATGTTT	5.02e-05	2.51e-05	3.77e-05	-0.020381	0.0142978	1.7e-09	2.03e-05	2.03e-05	-6.0247	4.26142	6074	6146	0.000317293	0.000275465	0.000296379	-0.206274	0.190051	8.22e-53	4.4e-46	4.4e-46	-15.2965	14.2523	6278	6306	0.000277999	0.000275254	0.000276626	-0.129492	0.127694	2.24e-47	6.32e-47	6.32e-47	-14.4588	14.3872	6535	6557
AAACATAT	ATATGTTT	9.95e-05	0.000108801	0.000104173	-0.0244643	0.02519	2.17e-17	7.33e-19	2.17e-17	-8.48435	8.87008	8274	8442	0.000327564	0.000255332	0.000291448	-0.172949	0.152007	1.83e-54	7.64e-43	7.64e-43	-15.5422	13.7215	8952	9000	0.000297996	0.000245427	0.000271712	-0.110091	0.0993174	1.17e-50	4.96e-42	4.96e-42	-14.9699	13.5851	9377	9478
AAACATCA	TGATGTTT	6.75e-05	5.48e-05	6.12e-05	-0.0223255	0.0193402	2.81e-12	3.03e-10	3.03e-10	-6.98684	6.29748	6831	7260	0.000432205	0.000374967	0.000403586	-0.227617	0.209219	2.79e-71	4.4e-62	4.4e-62	-17.8538	16.6292	7006	7052	0.000296892	0.00025769	0.000277291	-0.126987	0.116609	1.78e-50	4.82e-44	4.82e-44	-14.9422	13.9205	7240	7314
AAACATGA	TCATGTTT	9.42e-05	7.98e-05	8.7e-05	-0.0262247	0.0240354	1.54e-16	3.1e-14	3.1e-14	-8.25393	7.59415	6878	6900	0.000318488	0.000290893	0.00030469	-0.194659	0.185536	5.28e-53	1.45e-48	1.45e-48	-15.3253	14.6461	7015	7039	0.000228035	0.000187151	0.000207593	-0.110615	0.0998661	3.56e-39	1.86e-32	1.86e-32	-13.0948	11.8628	7287	7320
AAACATGC	GCATGTTT	3.36e-05	5.94e-05	4.65e-05	-0.0195569	0.0262032	8.3e-07	5.62e-11	8.3e-07	-4.92833	6.55362	4437	4371	0.00032635	0.000343843	0.000335097	-0.247276	0.255182	2.87e-54	4.43e-57	2.87e-54	-15.5133	15.9238	4492	4445	0.000201986	0.000216334	0.00020916	-0.130986	0.136351	6.77e-35	2.97e-37	6.77e-35	-12.3241	12.7544	4644	4585
AAACATTC	GAATGTTT	0.000117504	0.000137263	0.000127384	-0.0293531	0.032185	3.03e-20	2.22e-23	3.03e-20	-9.21807	9.9631	6903	6647	0.000494445	0.000499248	0.000496847	-0.252164	0.249567	2.81e-81	4.76e-82	2.81e-81	-19.0967	19.1893	6560	6716	0.000295973	0.000383554	0.000339764	-0.1313	0.147033	2.52e-50	1.1e-64	2.52e-50	-14.919	16.9842	6786	6955
AAACCAAA	TTTGGTTT	0.000458059	0.000350157	0.000404108	-0.0405342	0.0345714	5.06e-74	5.13e-57	5.13e-57	-18.2032	15.9146	12553	12617	0.00203009	0.00179821	0.00191415	-0.346083	0.317737	0	1.67e-290	1.67e-290	-38.725	36.4421	12815	12842	0.00116697	0.00102826	0.00109762	-0.176631	0.161635	6.46e-193	3.22e-170	3.22e-170	-29.6369	27.8179	13223	13246
AAACCAAC	GTTGGTTT	7.16e-05	8.97e-05	8.07e-05	-0.0269534	0.0304876	6.13e-13	8.12e-16	6.13e-13	-7.19761	8.05255	4965	4844	0.00184679	0.00217459	0.00201069	-0.567313	0.622892	2.67e-298	0	2.67e-298	-36.932	40.0824	4807	4691	0.000626973	0.000721309	0.000674141	-0.222688	0.241181	1.51e-104	5.47e-120	1.51e-104	-21.7175	23.2952	4962	4863
AAACCAAG	CTTGGTTT	4.92e-05	3.44e-05	4.18e-05	-0.0201943	0.0169537	2.43e-09	6.03e-07	6.03e-07	-5.96629	4.99017	6046	6051	0.000271258	0.000305737	0.000288498	-0.192805	0.205963	2.09e-45	5.94e-51	2.09e-45	-14.143	15.0153	6094	6071	8.9e-05	8.43e-05	8.66e-05	-0.0748432	0.0732232	2.8e-16	1.73e-15	1.73e-15	-8.18168	7.95926	6212	6197
AAACCAAT	ATTGGTTT	0.000144787	0.000204875	0.000174831	-0.0377598	0.0447263	1.42e-24	4.39e-34	1.42e-24	-10.2326	12.1724	5135	5185	0.00112429	0.00115139	0.00113784	-0.426846	0.431038	2.32e-182	1.04e-186	2.32e-182	-28.8055	29.1511	5192	5232	0.000718484	0.000744862	0.000731673	-0.229151	0.232819	1.59e-119	7.64e-124	1.59e-119	-23.2495	23.6728	5391	5435
AAACCACA	TGTGGTTT	0.000334369	0.000379178	0.000356773	-0.0425241	0.0453113	1.59e-54	1.36e-61	1.59e-54	-15.5515	16.5612	9320	9350	0.00309978	0.0032544	0.00317709	-0.529164	0.541383	0	0	0	-47.8775	49.0609	9284	9358	0.0017775	0.00170109	0.0017393	-0.270489	0.264448	8e-293	2.57e-280	2.57e-280	-36.5882	35.7917	9549	9603
AAACCACC	GGTGGTTT	0.000147993	0.000114413	0.000131203	-0.0419575	0.0364068	4.42e-25	9.39e-20	9.39e-20	-10.3452	9.09601	4257	4322	0.000448532	0.000477286	0.000462909	-0.296288	0.299714	6.66e-74	1.6e-78	6.66e-74	-18.1881	18.7623	4313	4428	0.000174927	0.000198694	0.000186811	-0.125916	0.131797	1.91e-30	2.35e-34	1.91e-30	-11.4687	12.2232	4363	4466
AAACCACT	AGTGGTTT	0.000118657	0.000177018	0.000147837	-0.0327433	0.0394815	1.99e-20	1.12e-29	1.99e-20	-9.26319	11.3145	5607	5782	0.00161658	0.00191949	0.00176803	-0.493859	0.529925	2.35e-261	5.73182123049742e-310	2.35e-261	-34.5496	37.6532	5607	5796	0.000494479	0.000481693	0.000488086	-0.184298	0.17978	7.45e-83	9.25e-81	9.25e-81	-19.2855	19.0344	5753	5918
AAACCAGA	TCTGGTTT	3.28e-05	2.11e-05	2.7e-05	-0.0157847	0.0126429	1.12e-06	9.26e-05	9.26e-05	-4.86896	3.90923	6521	6552	0.000555573	0.000569917	0.000562745	-0.264005	0.267947	4.3e-91	2.14e-93	4.3e-91	-20.2434	20.5032	6569	6588	0.000233368	0.000217917	0.000225642	-0.115968	0.112035	4.74e-40	1.63e-37	1.63e-37	-13.2471	12.8009	6704	6755
AAACCAGC	GCTGGTTT	3.24e-05	2.55e-05	2.9e-05	0.0181723	-0.0160069	1.27e-06	1.77e-05	1.77e-05	4.84394	-4.29253	4974	5065	2.42e-05	1.17e-05	1.8e-05	0.0637843	-0.0442914	2.39e-05	0.00330408	0.00330408	4.22451	-2.93794	5017	5065	4.88e-05	2.12e-05	3.5e-05	0.0615285	-0.04044	1.38e-09	6.63e-05	6.63e-05	6.05827	-3.98932	5094	5143
AAACCATA	TATGGTTT	0.000488642	0.0005405	0.000514571	-0.0606707	0.0637665	7.69e-79	5.22e-87	7.69e-79	-18.8014	19.7744	6623	6698	0.00346537	0.00347754	0.00347145	-0.65915	0.661884	0	0	0	-50.6315	50.7206	6638	6677	0.00149787	0.00147031	0.00148409	-0.292057	0.289473	4.63e-247	1.5e-242	1.5e-242	-33.5824	33.2715	6848	6896
AAACCATC	GATGGTTT	0.00016564	0.000210076	0.000187858	-0.0389752	0.0436648	7.08e-28	6.62e-35	7.08e-28	-10.9448	12.326	5495	5536	0.00037154	0.000282652	0.000327096	-0.237939	0.206238	1.56e-61	3.07e-47	3.07e-47	-16.553	14.4371	5514	5544	0.000130879	8.11e-05	0.000105969	-0.0962482	0.075308	3.42e-23	5.88e-15	5.88e-15	-9.92004	7.80665	5567	5586
AAACCCAA	TTGGGTTT	6.64e-05	6.54e-05	6.59e-05	-0.0232616	0.0229283	4.3e-12	6.05e-12	6.05e-12	-6.92703	6.87866	6164	6234	0.000631108	0.000676295	0.000653701	-0.291086	0.298894	3.21e-103	1.79e-110	3.21e-103	-21.5765	22.3361	6234	6314	0.00029393	0.000316204	0.000305067	-0.134139	0.137994	5.45e-50	1.21e-53	5.45e-50	-14.8674	15.4206	6409	6493
AAACCCAC	GTGGGTTT	9.66e-05	7.38e-05	8.52e-05	-0.0321234	0.0280691	6.5e-17	2.74e-13	2.74e-13	-8.35599	7.30649	4716	4736	0.000742715	0.000720124	0.00073142	-0.362649	0.355306	3.92e-121	1.66e-117	1.66e-117	-23.408	23.049	4749	4797	0.000406591	0.000362943	0.000384767	-0.182156	0.171998	1.86e-68	2.64e-61	2.64e-61	-17.487	16.5214	4820	4833
AAACCCAG	CTGGGTTT	3.3e-06	1.63e-06	2.46e-06	0.0049107	-0.00344534	0.122515	0.278008	0.278008	1.5443	-1.08481	6886	6881	0.000217467	0.00018669	0.000202079	-0.161143	0.149434	9.57e-37	8.73e-32	8.73e-32	-12.663	11.7326	7023	6982	8.05e-05	5.95e-05	7e-05	-0.066668	0.0574426	7.26e-15	2.25e-11	2.25e-11	-7.7801	6.68907	7117	7057
AAACCCAT	ATGGGTTT	3.45e-05	1.01e-05	2.23e-05	-0.0185965	0.0100042	5.81e-07	0.00692346	0.00692346	-4.99731	2.70051	5056	5103	0.000835345	0.000809937	0.000822641	-0.371731	0.365297	5.34e-136	6.39e-132	6.39e-132	-24.826	24.4452	5110	5125	0.00022679	0.00021227	0.00021953	-0.13114	0.126564	5.7e-39	1.38e-36	1.38e-36	-13.059	12.634	5214	5243
AAACCCCA	TGGGGTTT	0.00140725	0.00140505	0.00140615	0.0724239	-0.0724383	1.94e-223	4.32e-223	4.32e-223	31.9212	-31.8962	13603	13575	0.000702579	0.000722087	0.000712333	-0.20576	0.208931	1.08e-114	8.02e-118	1.08e-114	-22.7663	23.0804	14019	13969	3.55e-05	2.87e-05	3.21e-05	-0.0315909	0.0284501	2.35e-07	3.41e-06	3.41e-06	-5.16949	4.64449	14092	14016
AAACCCCG	CGGGGTTT	0.00433063	0.00434404	0.00433733	0.16381	-0.162769	0	0	0	56.0797	-56.1668	8259	8351	6.24e-06	3.34e-07	3.29e-06	-0.0247982	0.00570439	0.0319842	0.619566	0.619566	-2.14461	0.496466	8657	8724	0.000849639	0.000976599	0.000913119	0.198409	-0.21151	5.45e-141	9.14e-162	5.45e-141	25.2843	-27.1094	8624	8679
AAACCCTA	TAGGGTTT	4.35e-05	4.17e-05	4.26e-05	-0.0216748	0.0211776	2.05e-08	3.97e-08	3.97e-08	-5.60748	5.49227	4584	4655	0.00311356	0.00338132	0.00324744	-0.74887	0.778486	0	0	0	-47.9842	50.0116	4594	4656	0.000825119	0.000819345	0.000822232	-0.260875	0.258808	5.61e-137	4.94e-136	4.94e-136	-24.9165	24.8291	4703	4779
AAACCCTC	GAGGGTTT	3.75e-07	1.59e-07	2.67e-07	0.00228159	0.00152129	0.602575	0.734561	0.734561	0.520701	0.339065	3663	3452	0.000197313	0.000132295	0.000164804	-0.221036	0.179897	1.69e-33	5.29e-23	5.29e-23	-12.0618	9.87625	3417	3414	6.14e-05	3.04e-05	4.59e-05	-0.083808	0.0586465	1.09e-11	1.73e-06	1.73e-06	-6.79441	4.78298	3465	3462
AAACCCTG	CAGGGTTT	0.00167295	0.00177191	0.00172243	0.0883326	-0.0907159	2.94e-265	7.8e-281	2.94e-265	34.8091	-35.8256	10889	10947	0.00011173	8.01e-05	9.59e-05	-0.0917358	0.0775327	1.13e-19	1.51e-14	1.51e-14	-9.07615	7.68651	11240	11298	9.84e-05	6.58e-05	8.21e-05	0.0588806	-0.0479972	7.76e-18	2.03e-12	2.03e-12	8.60335	-7.03282	11270	11334
AAACCCTT	AAGGGTTT	9.96e-06	1.83e-05	1.41e-05	-0.0106573	0.0141955	0.00728467	0.000275671	0.00728467	-2.68355	3.63717	4427	4546	0.000707862	0.000790651	0.000749256	-0.367714	0.383001	1.54e-115	7.95e-129	1.54e-115	-22.8518	24.1522	4395	4501	0.000278723	0.000302024	0.000290374	-0.156069	0.159677	1.7e-47	2.57e-51	1.7e-47	-14.4776	15.0708	4502	4626
AAACCTAA	TTAGGTTT	5.32e-05	8.43e-05	6.87e-05	-0.022656	0.0284906	5.56e-10	5.9e-15	5.56e-10	-6.2024	7.80625	5171	5191	0.000357233	0.000351501	0.000354367	-0.237487	0.235558	3.12e-59	2.6e-58	2.6e-58	-16.231	16.1002	5254	5278	0.000213136	0.000190423	0.00020178	-0.123314	0.116664	9.97e-37	5.39e-33	5.39e-33	-12.6597	11.966	5447	5460
AAACCTAG	CTAGGTTT	0.00010098	0.000103613	0.000102296	-0.0340863	0.0344548	1.28e-17	4.9e-18	1.28e-17	-8.54532	8.65598	4402	4417	0.00285055	0.00282811	0.00283933	-0.742717	0.73821	0	0	0	-45.9068	45.7252	4358	4373	0.000837424	0.000839482	0.000838453	-0.270645	0.270128	5.43e-139	2.5e-139	5.43e-139	-25.1017	25.1326	4516	4538
AAACCTCA	NA	1.48e-08	NA	1.48e-08	0.000342773	NA	0.917543	NA	0.917543	0.103529	NA	6393	NA	0.000181565	NA	0.000181565	-0.15551	NA	5.86e-31	NA	5.86e-31	-11.5704	NA	6331	NA	5.91e-05	NA	5.91e-05	-0.0602588	NA	2.59e-11	NA	2.59e-11	-6.6682	NA	6435	NA
AAACCTCG	CGAGGTTT	0.000179876	0.000183431	0.000181653	0.0921086	-0.0968367	3.95e-30	1.08e-30	3.95e-30	11.4055	-11.5176	1081	1000	1.44e-05	2.5e-07	7.31e-06	-0.10465	0.0144143	0.00113141	0.667788	0.667788	-3.25564	0.429185	1115	1024	2.07e-05	5.03e-05	3.55e-05	0.0861021	-0.139918	7.91e-05	7.74e-10	7.91e-05	3.94709	-6.15025	1112	1025
AAACCTGA	TCAGGTTT	9.41e-05	9.19e-05	9.3e-05	-0.0288001	0.0284172	1.6e-16	3.58e-16	3.58e-16	-8.24869	8.1523	5710	5711	0.0023198	0.00203835	0.00217907	-0.582396	0.557593	0	0	0	-41.4021	38.8038	5674	5474	0.000362201	0.000305888	0.000334045	-0.155271	0.145341	3.49e-61	5.96e-52	5.96e-52	-16.5045	15.1669	5841	5666
AAACCTGC	GCAGGTTT	0.000191632	0.000159154	0.000175393	-0.0463064	0.042342	5.45e-32	7.53e-27	7.53e-27	-11.7724	10.7283	4525	4483	0.000136224	0.000146177	0.0001412	-0.156705	0.162874	1.23e-23	3.02e-25	1.23e-23	-10.0219	10.3816	4681	4647	0.000109055	9.72e-05	0.000103106	-0.0954076	0.0903331	1.37e-19	1.27e-17	1.27e-17	-9.05516	8.54685	4733	4701
AAACTAAA	TTTAGTTT	0.000173805	0.000277518	0.000225661	-0.028079	0.0358535	3.61e-29	1.48e-45	3.61e-29	-11.2113	14.1675	10405	10464	0.00205729	0.00215611	0.0021067	-0.387829	0.400773	0	0	0	-38.9841	39.9113	10717	10824	0.000582871	0.000688794	0.000635832	-0.137913	0.151638	2.51e-97	1.15e-114	2.51e-97	-20.9393	22.7637	11251	11330
AAACTAAC	GTTAGTTT	0.000155452	0.000204177	0.000179815	-0.0442853	0.0508593	2.91e-26	5.66e-34	2.91e-26	-10.6028	12.1517	4009	3998	0.000635689	0.000552157	0.000593923	-0.36078	0.339162	5.91e-104	1.52e-90	1.52e-90	-21.6547	20.181	4119	4050	0.000121172	9.72e-05	0.000109176	-0.105996	0.0960152	1.36e-21	1.26e-17	1.26e-17	-9.54501	8.54793	4254	4168
AAACTAAG	CTTAGTTT	9.97e-05	5.51e-05	7.74e-05	-0.0311219	0.0230214	2.09e-17	2.75e-10	2.75e-10	-8.48913	6.31207	5152	5248	0.000973956	0.000984803	0.00097938	-0.392753	0.394125	3.06e-158	5.56e-160	3.06e-158	-26.8086	26.9576	5260	5341	0.000346796	0.00034529	0.000346043	-0.15776	0.156783	1.17e-58	2.06e-58	2.06e-58	-16.1496	16.1145	5437	5520
AAACTACA	TGTAGTTT	0.000131699	0.000149769	0.000140734	-0.0324545	0.0351277	1.69e-22	2.31e-25	1.69e-22	-9.75904	10.4071	6311	6138	0.00113912	0.000828593	0.000983855	-0.387484	0.335797	9.66e-185	6.48e-135	6.48e-135	-28.9951	24.7254	6370	6196	0.000383928	0.000279224	0.000331576	-0.15091	0.130311	9.59e-65	1.41e-47	1.41e-47	-16.9925	14.4906	6631	6483
AAACTACC	GGTAGTTT	0.000174526	0.000238653	0.000206589	-0.0467987	0.0545591	2.77e-29	2.02e-39	2.77e-29	-11.2346	13.1378	4049	4062	0.00521943	0.00452739	0.00487341	-1.04838	0.978434	0	0	0	-62.1928	57.9031	4018	3983	0.00117107	0.00111736	0.00114422	-0.334651	0.32723	1.38e-193	8.5e-185	8.5e-185	-29.689	28.9993	4146	4119
AAACTAGA	TCTAGTTT	2.17e-06	0.000193141	9.77e-05	0.0035188	0.0389397	0.21061	3.15e-32	0.21061	1.25189	11.8186	8695	6371	0.00217642	0.00237368	0.00227505	-0.540457	0.566575	0	0	0	-40.0993	41.8812	6117	6155	0.00107496	0.00112878	0.00110187	-0.25409	0.261362	7.36e-178	1.15e-186	7.36e-178	-28.4432	29.1473	6414	6444
AAACTATA	TATAGTTT	0.000325749	0.000433894	0.000379821	-0.0471689	0.05454	3.63e-53	3.25e-70	3.63e-53	-15.3497	17.7163	7313	7246	0.00396625	0.00350263	0.00373444	-0.652247	0.619035	0	0	0	-54.1808	50.904	7598	7521	0.000815863	0.000825392	0.000820627	-0.196836	0.199115	1.83e-135	5.06e-137	1.83e-135	-24.7762	24.9206	8054	8018
AAACTATC	GATAGTTT	0.000224924	0.000297264	0.000261094	-0.0492461	0.0576846	2.98e-37	1.13e-48	2.98e-37	-12.7542	14.663	4631	4493	0.000937922	0.00110094	0.00101943	-0.410344	0.452198	1.85e-152	1.29e-178	1.85e-152	-26.3075	28.5045	4626	4501	0.000263763	0.000361342	0.000312553	-0.146249	0.174331	4.86e-45	4.83e-61	4.86e-45	-14.0836	16.4849	4797	4663
AAACTATT	AATAGTTT	8.86e-05	0.000103427	9.6e-05	-0.0245139	0.0262101	1.22e-15	5.24e-18	1.22e-15	-8.0022	8.64821	7402	7525	0.000847907	0.000892538	0.000870222	-0.301914	0.307209	5.15e-138	3.55e-145	5.15e-138	-25.0121	25.6625	7765	7847	0.000312593	0.000340501	0.000326547	-0.122695	0.126546	4.74e-53	1.26e-57	4.74e-53	-15.3323	16.0023	8126	8261
AAACTCAA	TTGAGTTT	0.000115179	7.4e-05	9.46e-05	-0.0289806	0.0228282	7.1e-20	2.58e-13	2.58e-13	-9.12638	7.31491	6746	7092	0.000432623	0.000441627	0.000437125	-0.228389	0.232118	2.39e-71	8.56e-73	2.39e-71	-17.8625	18.0475	6794	6806	0.000150692	0.00018469	0.000167691	-0.0905833	0.1008	1.86e-26	4.72e-32	1.86e-26	-10.6445	11.7845	7045	7071
AAACTCAC	GTGAGTTT	9.97e-05	0.000119333	0.00010953	-0.0333051	0.0363529	2.03e-17	1.55e-20	2.03e-17	-8.49212	9.28952	4577	4565	0.000909673	0.000958534	0.000934103	-0.428188	0.422671	6.32e-148	9.13e-156	6.32e-148	-25.9079	26.5953	4207	4496	0.000622654	0.000665652	0.000644153	-0.238076	0.237107	7.69e-104	7.04e-111	7.69e-104	-21.6425	22.3778	4368	4645
AAACTCCA	TGGAGTTT	0.000200779	0.000289332	0.000245056	0.0354029	-0.0421675	1.95e-33	2.02e-47	1.95e-33	12.0501	-14.466	8033	8163	0.000240279	0.000220202	0.00023024	-0.156215	0.148836	2.03e-40	3.47e-37	3.47e-37	-13.3107	12.7424	8230	8316	4.39e-05	3.19e-05	3.79e-05	-0.045472	0.03852	9.11e-09	9.81e-07	9.81e-07	-5.74663	4.89548	8319	8424
AAACTCCG	CGGAGTTT	0.000432505	0.000555601	0.000494053	0.0996996	-0.110035	5.37e-70	2.18e-89	5.37e-70	17.6879	-20.0489	2183	2278	1.67e-05	6.9e-06	1.18e-05	-0.0790127	0.049539	0.000454742	0.0240881	0.0240881	-3.50611	2.25573	2236	2330	1.48e-05	1.69e-05	1.58e-05	0.050899	-0.0533008	0.000858024	0.000362131	0.000858024	3.33338	-3.56626	2237	2316
AAACTCCT	AGGAGTTT	0.000775324	0.00111577	0.000945548	-0.0530591	0.064905	5.56e-124	1.45e-177	5.56e-124	-23.6863	28.4196	13853	13302	3.06e-05	1.11e-05	2.08e-05	-0.0432868	0.0260316	2.07e-06	0.00421663	0.00421663	-4.7461	2.86149	13637	13708	1.84e-05	2.55e-05	2.2e-05	-0.0229219	0.0269174	0.000200773	1.18e-05	0.000200773	-3.71806	4.3814	13708	13800
AAACTCTA	TAGAGTTT	2.73e-05	2.9e-05	2.81e-05	-0.0167803	0.0169534	8.8e-06	4.73e-06	8.8e-06	-4.44466	4.57661	4910	4974	0.000525854	0.000537174	0.000531514	-0.297338	0.297137	2.54e-86	3.87e-88	2.54e-86	-19.6942	19.9052	5012	5077	0.000102242	9.93e-05	0.000100767	-0.0881086	0.0855263	1.83e-18	5.62e-18	5.62e-18	-8.76769	8.6403	5196	5249
AAACTCTC	GAGAGTTT	9.33e-05	4.88e-05	7.11e-05	-0.0299266	0.0219305	2.16e-16	2.8e-09	2.8e-09	-8.21301	5.94277	5269	5116	0.000526586	0.000497395	0.00051199	-0.29795	0.286916	1.94e-86	9.45e-82	9.45e-82	-19.7079	19.1536	4991	5065	0.00037363	0.00037428	0.000373955	-0.169957	0.168149	4.67e-63	3.66e-63	4.67e-63	-16.763	16.7776	5100	5201
AAACTCTG	NA	0.000142724	NA	0.000142724	0.0301678	NA	3.02e-24	NA	3.02e-24	10.1594	NA	7917	NA	6.24e-05	NA	6.24e-05	-0.080686	NA	1.16e-11	NA	1.16e-11	-6.78485	NA	8062	NA	5.08e-06	NA	5.08e-06	-0.0156762	NA	0.0505645	NA	0.0505645	-1.95516	NA	8154	NA
AAACTGAA	TTCAGTTT	0.000178877	0.000242591	0.000210734	-0.0287007	0.033459	5.68e-30	4.82e-40	5.68e-30	-11.3737	13.2458	10814	10791	0.00146098	0.00199497	0.00172797	-0.33426	0.389514	2.19e-236	4.34777768340297e-322	2.19e-236	-32.8421	38.3879	10827	10888	0.00064123	0.000892556	0.000766893	-0.148511	0.175016	7e-107	5.17e-148	7e-107	-21.9632	25.9156	11284	11305
AAACTGCA	TGCAGTTT	9.9e-05	5.51e-05	7.7e-05	-0.0281638	0.0204625	2.68e-17	2.78e-10	2.78e-10	-8.46001	6.31054	6321	6606	0.000784294	0.000800064	0.000792179	-0.32657	0.320676	8.33e-128	2.45e-130	8.33e-128	-24.0548	24.2956	6204	6507	0.000222847	0.000298261	0.000260554	-0.117587	0.132748	2.53e-38	1.06e-50	2.53e-38	-12.945	14.9766	6369	6637
AAACTGGA	TCCAGTTT	0.000415707	0.000381687	0.000398697	-0.0489723	0.0474986	2.38e-67	5.49e-62	5.49e-62	-17.3409	16.6159	8717	8464	0.00371248	0.00337724	0.00354486	-0.608737	0.580015	0	0	0	-52.4121	49.9813	8386	8362	0.000631409	0.000536876	0.000584143	-0.169558	0.155779	2.84e-105	8.5e-90	8.5e-90	-21.7942	20.0957	8612	8624
AAACTGGC	GCCAGTTT	8.45e-05	0.000108391	9.64e-05	-0.029666	0.0336578	5.47e-15	8.51e-19	5.47e-15	-7.81572	8.85337	4837	4800	0.00246489	0.00226213	0.00236351	-0.653896	0.628251	0	0	0	-42.6802	40.883	4838	4791	0.000496246	0.000438467	0.000467356	-0.198978	0.187441	3.83e-83	1.11e-73	1.11e-73	-19.3199	18.1599	4929	4886
AAACTTAC	NA	0.000127599	NA	0.000127599	-0.0391534	NA	7.57e-22	NA	7.57e-22	-9.60593	NA	4205	NA	0.000158314	NA	0.000158314	-0.175784	NA	3.31e-27	NA	3.31e-27	-10.804	NA	4310	NA	5.33e-05	NA	5.33e-05	-0.0686421	NA	2.43e-10	NA	2.43e-10	-6.33141	NA	4462	NA
AAACTTCA	TGAAGTTT	2.21e-05	5.22e-05	3.72e-05	-0.0130614	0.0199044	6.29e-05	8.05e-10	6.29e-05	-4.00169	6.14404	6522	6654	0.000231465	0.000273102	0.000252283	-0.170139	0.183129	5.32e-39	1.06e-45	5.32e-39	-13.0643	14.191	6699	6851	0.000143898	0.00015513	0.000149514	-0.0902287	0.0930918	2.44e-25	3.45e-27	2.44e-25	-10.4018	10.8002	6928	7053
AAAGAAAA	TTTTCTTT	0.000408562	0.000409314	0.000408938	0.0174092	-0.0170945	3.19e-66	2.43e-66	3.19e-66	17.1912	-17.207	40750	41935	0.00204159	0.00208348	0.00206253	-0.155169	0.154819	0	0	0	-38.8347	39.232	42373	42546	0.0016921	0.00158983	0.00164097	-0.0954998	0.0913286	7.6e-279	4.13e-262	4.13e-262	-35.6968	34.5996	43750	43959
AAAGAAAC	GTTTCTTT	0.000113154	0.000135164	0.000124159	-0.0216707	0.0235708	1.49e-19	4.77e-23	1.49e-19	-9.04581	9.88661	11988	12086	0.00238776	0.00264167	0.00251471	-0.403333	0.422298	0	0	0	-42.0055	44.1882	12163	12278	0.000837438	0.00098504	0.000911239	-0.160497	0.17366	5.41e-139	3.8e-163	5.41e-139	-25.1019	27.2264	12594	12687
AAAGAAAG	CTTTCTTT	0.000187223	0.000153177	0.0001702	0.00868394	-0.00782397	2.72e-31	6.66e-26	6.66e-26	11.6361	-10.5249	19127	19757	0.000106717	0.000179063	0.00014289	-0.0267868	0.0356214	7.32e-19	1.48e-30	7.32e-19	-8.87018	11.4904	19598	19298	1.39e-05	3.33e-05	2.36e-05	-0.00643953	0.0101707	0.00122595	5.67e-07	0.00122595	-3.23278	5.00211	20086	19804
AAAGAAAT	ATTTCTTT	0.000150911	0.000121907	0.000136409	-0.0192313	0.0171513	1.52e-25	6.06e-21	6.06e-21	-10.4467	9.38918	19847	20242	0.00151301	0.00150085	0.00150693	-0.244587	0.242374	9.79e-245	8.74e-243	8.74e-243	-33.4227	33.288	20547	20708	0.00114326	0.00098152	0.00106239	-0.142397	0.131196	4.9e-189	1.43e-162	1.43e-162	-29.334	27.1777	21393	21607
AAAGAACA	TGTTCTTT	0.000261086	0.000311525	0.000286306	-0.0327511	0.0354158	5.79e-43	6.36e-51	5.79e-43	-13.7416	15.0107	12117	12406	0.00300379	0.00287391	0.00293885	-0.457292	0.444245	0	0	0	-47.1281	46.095	11873	12131	0.00102298	0.000809689	0.000916335	-0.178581	0.157674	2.35e-169	1.88e-134	1.88e-134	-27.7463	24.6822	12429	12694
AAAGAACT	AGTTCTTT	0.000171926	0.000158605	0.000165266	-0.0313422	0.0294873	7.16e-29	9.2e-27	9.2e-27	-11.1505	10.7098	8704	9135	0.00130893	0.0012373	0.00127311	-0.355454	0.338968	5.47e-212	1.7e-200	1.7e-200	-31.0838	30.2202	8576	8967	0.000396049	0.000317114	0.000356581	-0.131336	0.115092	9.9e-67	8.6e-54	8.6e-54	-17.2588	15.4428	8903	9344
AAAGAAGA	TCTTCTTT	4.54e-05	6.64e-05	5.59e-05	-0.0114509	0.0137121	9.95e-09	4.29e-12	9.95e-09	-5.73171	6.92755	16267	16566	0.00231371	0.00211653	0.00221512	-0.332877	0.315639	0	0	0	-41.3475	39.5425	16410	16702	0.000331164	0.000343538	0.000337351	-0.0846086	0.0854268	4.27e-56	4e-58	4.27e-56	-15.7813	16.0735	16980	17246
AAAGAAGC	GCTTCTTT	6.26e-05	5.86e-05	6.06e-05	-0.0216622	0.0207522	1.75e-11	7.45e-11	7.45e-11	-6.7257	6.51144	6710	6876	0.000310585	0.000221534	0.000266059	-0.195775	0.16379	9.86e-52	2.12e-37	2.12e-37	-15.1339	12.7809	6795	6944	5.62e-05	2.7e-05	4.16e-05	-0.0564055	0.0387876	7.87e-11	6.61e-06	6.61e-06	-6.50307	4.50593	6948	7067
AAAGAAGG	CCTTCTTT	0.000104084	8.18e-05	9.29e-05	-0.0215721	0.0186484	4.12e-18	1.46e-14	1.46e-14	-8.67565	7.69103	10040	10191	0.000480873	0.000438419	0.000459646	-0.188071	0.176279	4.26e-79	2.81e-72	2.81e-72	-18.8327	17.9818	10137	10216	7.37e-05	0.000162766	0.000118228	-0.0497111	0.0731921	9.83e-14	1.91e-28	9.83e-14	-7.44337	11.0628	10404	10449
AAAGAATA	TATTCTTT	5.07e-05	2.21e-05	3.64e-05	-0.0147864	0.00973207	1.41e-09	6.3e-05	6.3e-05	-6.05475	4.00122	11480	11554	0.000472696	0.000589298	0.000530997	-0.17888	0.199335	8.75e-78	1.66e-96	8.75e-78	-18.6718	20.8491	12096	12173	0.000383376	0.000290776	0.000337076	-0.107862	0.0937631	1.18e-64	1.8e-49	1.8e-49	-16.9803	14.7874	12632	12699
AAAGAATC	GATTCTTT	6.15e-05	5.27e-05	5.71e-05	-0.0230139	0.0216329	2.62e-11	6.72e-10	6.72e-10	-6.66674	6.17253	5814	5676	0.000308563	0.000316796	0.000312679	-0.209216	0.214494	2.08e-51	9.89e-53	2.08e-51	-15.0845	15.2845	5890	5784	0.000114554	0.000200789	0.000157671	-0.085889	0.114984	1.69e-20	1.07e-34	1.69e-20	-9.28066	12.2875	6077	5971
AAAGAATT	AATTCTTT	1.35e-05	1.07e-05	1.21e-05	-0.00778203	0.00684777	0.00181198	0.00540231	0.00540231	-3.11945	2.78202	11080	11329	0.000598016	0.000665077	0.000631547	-0.209067	0.218752	6.6e-98	1.13e-108	6.6e-98	-21.0029	22.15	11340	11473	0.000302945	0.00023443	0.000268688	-0.0998079	0.0871994	1.81e-51	3.17e-40	3.17e-40	-15.0937	13.2772	11789	11928
AAAGACAA	TTGTCTTT	0.000338858	0.000289271	0.000314064	-0.0381893	0.0350043	3.11e-55	2.06e-47	2.06e-47	-15.6556	14.4645	11396	11591	0.00125495	0.00136164	0.00130829	-0.297419	0.30776	2.51e-203	1.91e-220	2.51e-203	-30.4353	31.7044	11615	11780	0.000804698	0.000999802	0.00090225	-0.160091	0.176989	1.23e-133	1.46e-165	1.23e-133	-24.606	27.4298	12047	12232
AAAGACAC	GTGTCTTT	0.000367742	0.000440608	0.000404175	-0.0478001	0.0527089	8.67e-60	2.84e-71	8.67e-60	-16.3095	17.8529	7974	7781	0.00360893	0.00364505	0.00362699	-0.617198	0.626205	0	0	0	-51.6733	51.9322	7820	7601	0.00172464	0.0017989	0.00176177	-0.287155	0.295765	3.58e-284	2.52e-296	3.58e-284	-36.0391	36.8081	8084	7871
AAAGACAG	CTGTCTTT	0.000162308	0.000214054	0.000188181	-0.0291085	0.0337542	2.38e-27	1.56e-35	2.38e-27	-10.8341	12.4422	9524	9279	0.000234072	0.000320541	0.000277306	-0.142404	0.168163	2.02e-39	2.47e-53	2.02e-39	-13.1377	15.3746	9554	9331	0.000194641	0.000167989	0.000181315	-0.0880459	0.0825105	1.09e-33	2.64e-29	2.64e-29	-12.0978	11.239	9734	9499
AAAGACAT	ATGTCTTT	0.000239438	0.000303526	0.000271482	-0.0364138	0.0406631	1.52e-39	1.16e-49	1.52e-39	-13.1594	14.8167	9031	9150	0.000592474	0.000543993	0.000568234	-0.231466	0.220469	5.12e-97	3.11e-89	3.11e-89	-20.9053	20.0312	9222	9323	0.00034397	0.000321782	0.000332876	-0.118594	0.114065	3.4e-58	1.48e-54	1.48e-54	-16.0836	15.5561	9551	9627
AAAGACCA	TGGTCTTT	6.79e-05	7.39e-05	7.09e-05	-0.0236481	0.0244225	2.46e-12	2.69e-13	2.46e-12	-7.00568	7.30941	6165	6285	0.00145693	0.00175276	0.00160485	-0.448504	0.487591	9.75e-236	3.28e-283	9.75e-236	-32.7966	35.9778	6126	6228	0.00030412	0.000262241	0.000283181	-0.138724	0.127686	1.16e-51	8.63e-45	8.63e-45	-15.123	14.0429	6263	6364
AAAGACCT	AGGTCTTT	3.8e-05	5.95e-05	4.88e-05	-0.0194996	0.0239028	1.57e-07	5.41e-11	1.57e-07	-5.2445	6.55924	5077	5253	0.000329503	0.000232121	0.000280812	-0.23322	0.193333	8.95e-55	4.17e-39	4.17e-39	-15.5881	13.0828	5118	5219	0.000119526	5.22e-05	8.59e-05	-0.0951507	0.0620327	2.55e-21	3.75e-10	3.75e-10	-9.47994	6.26438	5226	5336
AAAGACTT	AAGTCTTT	0.000290271	0.000308296	0.000299283	-0.040507	0.0418318	1.43e-47	2.05e-50	1.43e-47	-14.4895	14.9327	8608	8574	0.00264533	0.00206176	0.00235354	-0.497243	0.440496	0	0	0	-44.2189	39.0265	8691	8626	0.000433714	0.000371683	0.000402699	-0.135801	0.125879	6.68e-73	9.75e-63	9.75e-63	-18.0611	16.7192	8950	8924
AAAGAGAA	TTCTCTTT	0.000106785	0.000139902	0.000123344	-0.0168701	0.0191608	1.53e-18	8.46e-24	1.53e-18	-8.78752	10.0584	17497	17585	0.00137371	0.00153945	0.00145658	-0.244521	0.256585	2.21e-222	5.6e-249	2.21e-222	-31.8447	33.7139	17811	17960	0.000813616	0.000825494	0.000819555	-0.126944	0.126865	4.28e-135	4.87e-137	4.28e-135	-24.742	24.9221	18314	18435
AAAGAGAC	GTCTCTTT	0.000167125	0.000107786	0.000137455	-0.034563	0.027468	4.12e-28	1.06e-18	1.06e-18	-10.9937	8.82859	6600	6679	0.00256993	0.00226664	0.00241829	-0.556154	0.517839	0	0	0	-43.5825	40.9238	6587	6655	0.000643223	0.000593539	0.000618381	-0.187269	0.178212	3.3e-107	4.49e-99	4.49e-99	-21.9973	21.1302	6776	6842
AAAGAGAG	CTCTCTTT	4.96e-05	9.06e-05	7.01e-05	-0.0133885	0.0178779	2.14e-09	5.88e-16	2.14e-09	-5.98717	8.09207	11934	12488	0.000578933	0.000617717	0.000598325	-0.186078	0.193538	7.64e-95	4.54e-101	7.64e-95	-20.6649	21.3462	11974	11999	0.000467458	0.000488288	0.000477873	-0.113058	0.116676	1.98e-78	7.69e-82	1.98e-78	-18.7509	19.1643	12254	12247
AAAGAGAT	ATCTCTTT	4.66e-05	2.93e-05	3.79e-05	-0.0167567	0.0131899	6.49e-09	4.15e-06	4.15e-06	-5.80379	4.60367	8310	8363	0.000129404	0.000160754	0.000145079	-0.11258	0.124925	1.55e-22	1.34e-27	1.55e-22	-9.76773	10.887	8511	8540	7.2e-05	7.98e-05	7.59e-05	-0.0566622	0.0592791	1.88e-13	9.49e-15	1.88e-13	-7.35698	7.7461	8755	8787
AAAGAGCA	TGCTCTTT	6.03e-05	9.69e-05	7.86e-05	-0.0206231	0.0259418	4.06e-11	5.66e-17	4.06e-11	-6.60206	8.37222	7148	7250	0.000229732	0.00024945	0.000239591	-0.163933	0.169385	1.01e-38	6.76e-42	1.01e-38	-13.0153	13.5625	7193	7283	0.000163354	0.000138856	0.000151105	-0.0934414	0.0854763	1.53e-28	1.65e-24	1.65e-24	-11.0828	10.2179	7363	7453
AAAGAGCT	AGCTCTTT	0.000208503	0.000188054	0.000198278	-0.0378833	0.0357443	1.17e-34	2.01e-31	2.01e-31	-12.2797	11.6619	7308	7463	0.00242582	0.00204394	0.00223488	-0.530901	0.484466	0	0	0	-42.3398	38.8571	7215	7347	0.000510593	0.000486104	0.000498348	-0.164776	0.160051	1.71e-85	1.75e-81	1.75e-81	-19.5973	19.1214	7386	7499
AAAGAGGA	TCCTCTTT	0.000239801	0.000209561	0.000224681	-0.0341047	0.0315233	1.33e-39	7.98e-35	7.98e-35	-13.1694	12.3109	10175	10472	0.0015014	0.00148486	0.00149313	-0.346765	0.341719	7.15e-243	3.22e-240	3.22e-240	-33.294	33.1099	10240	10532	0.0003705	0.000371586	0.000371043	-0.116952	0.116004	1.52e-62	1.01e-62	1.52e-62	-16.6926	16.7171	10411	10702
AAAGAGTC	GACTCTTT	4.1e-05	4.34e-05	4.22e-05	-0.0230782	0.0233876	5.19e-08	2.1e-08	5.19e-08	-5.44479	5.60382	3897	4040	0.000727925	0.000839019	0.000783472	-0.39605	0.420078	9.27e-119	1.38e-136	9.27e-119	-23.1736	24.8806	3910	4026	0.000291202	0.000273804	0.000282503	-0.169658	0.162434	1.53e-49	1.09e-46	1.09e-46	-14.7982	14.3492	3997	4117
AAAGATAA	TTATCTTT	0.000100467	6.26e-05	8.16e-05	-0.0217099	0.0168276	1.55e-17	1.7e-11	1.7e-11	-8.52355	6.73009	10465	10823	0.000474139	0.000468671	0.000471405	-0.187327	0.184166	5.13e-78	3.88e-77	3.88e-77	-18.7003	18.5921	11066	11288	0.000426663	0.000407965	0.000417314	-0.118651	0.11488	9.55e-72	1.11e-68	1.11e-68	-17.9137	17.5166	11602	11805
AAAGATAC	GTATCTTT	2.15e-05	2.49e-05	2.32e-05	-0.0139348	0.0148441	8.13e-05	2.18e-05	8.13e-05	-3.94044	4.2458	5563	5736	0.000633349	0.000685602	0.000659476	-0.303659	0.31353	1.4e-103	5.75e-112	1.4e-103	-21.6148	22.4894	5748	5889	0.000188037	0.000199394	0.000193715	-0.111325	0.113621	1.33e-32	1.81e-34	1.33e-32	-11.8908	12.2447	5947	6107
AAAGATAT	ATATCTTT	3.86e-05	3.49e-05	3.67e-05	-0.0157515	0.0147248	1.29e-07	5.11e-07	5.11e-07	-5.281	5.02208	7685	7928	0.00018405	0.000246898	0.000215474	-0.135693	0.15746	2.33e-31	1.74e-41	2.33e-31	-11.6493	13.4929	8118	8135	0.000150221	0.000231278	0.00019075	-0.0813778	0.101205	2.22e-26	1.04e-39	2.22e-26	-10.6279	13.1876	8555	8627
AAAGATCA	TGATCTTT	4.54e-05	1.6e-05	3.07e-05	-0.0175041	0.010283	1.02e-08	0.000658438	0.000658438	-5.72762	3.40634	7362	7411	0.000151942	5.31e-05	0.000102517	-0.132198	0.0778231	3.54e-26	3.95e-10	3.95e-10	-10.5844	6.25623	7222	7258	0.000245354	0.000212069	0.000228711	-0.112163	0.102948	5.1e-42	1.49e-36	1.49e-36	-13.5831	12.628	7572	7632
AAAGATCC	GGATCTTT	3.88e-05	4.3e-05	4.09e-05	-0.0253235	0.0256602	1.19e-07	2.45e-08	1.19e-07	-5.29434	5.57663	3057	3203	0.000241836	0.000349479	0.000295658	-0.260484	0.303484	1.14e-40	5.5e-58	1.14e-40	-13.3538	16.0538	3004	3132	0.000162684	0.000280012	0.000221348	-0.14404	0.181899	1.97e-28	1.05e-47	1.97e-28	-11.06	14.511	3094	3239
AAAGCAAA	TTTGCTTT	0.000410038	0.000251307	0.000330673	-0.0372295	0.0289664	1.87e-66	2.03e-41	2.03e-41	-17.2222	13.4817	13941	14338	0.00129275	0.00125368	0.00127322	-0.266912	0.262408	2.15e-209	4e-203	4e-203	-30.8909	30.4199	14253	14569	0.000875652	0.000752291	0.000813971	-0.147564	0.136634	3.02e-145	4.65e-125	4.65e-125	-25.6688	23.7906	14793	15063
AAAGCAAC	GTTGCTTT	0.000165054	0.000102136	0.000133595	-0.0417887	0.0327092	8.76e-28	8.41e-18	8.41e-18	-10.9254	8.59409	4765	4813	0.000474107	0.000527792	0.00050095	-0.286522	0.302612	5.19e-78	1.24e-86	5.19e-78	-18.6997	19.7305	4854	4840	0.000244308	0.00028798	0.000266144	-0.13912	0.150998	7.58e-42	5.16e-49	7.58e-42	-13.5541	14.7161	4975	4968
AAAGCAAG	CTTGCTTT	0.000142183	0.000131627	0.000136905	-0.0282584	0.0264147	3.68e-24	1.74e-22	1.74e-22	-10.1401	9.7564	8904	9399	0.00180147	0.00183779	0.00181963	-0.410343	0.406653	5.01e-291	7.41e-297	5.01e-291	-36.4751	36.8417	8891	9218	0.000944121	0.000849068	0.000896595	-0.200418	0.186086	1.89e-156	6.76e-141	6.76e-141	-26.6544	25.2758	9154	9529
AAAGCAAT	ATTGCTTT	0.000496368	0.000411811	0.00045409	-0.0524794	0.0468917	4.66e-80	9.8e-67	9.8e-67	-18.9495	17.2594	8859	9187	0.00345677	0.00351786	0.00348732	-0.563921	0.566499	0	0	0	-50.5685	51.0149	8905	8935	0.00134989	0.00134395	0.00134692	-0.23593	0.234374	7.58e-223	7.11e-222	7.11e-222	-31.8781	31.8078	9297	9337
AAAGCACA	TGTGCTTT	0.000325396	0.000266362	0.000295879	-0.047558	0.0427176	4.12e-53	8.51e-44	8.51e-44	-15.3414	13.8797	7214	7306	0.000428027	0.00060366	0.000515844	-0.220521	0.26018	1.31e-70	8.19e-99	1.31e-70	-17.7673	21.1018	7352	7435	0.000463968	0.000490844	0.000477406	-0.154756	0.158251	7.4e-78	2.93e-82	7.4e-78	-18.6807	19.2144	7575	7656
AAAGCACT	AGTGCTTT	0.000116344	0.000143475	0.00012991	-0.0307705	0.0339867	4.64e-20	2.3e-24	4.64e-20	-9.17245	10.1861	6201	6254	0.000315375	0.000353604	0.00033449	-0.204353	0.217064	1.67e-52	1.19e-58	1.67e-52	-15.2502	16.1483	6275	6297	0.000237599	0.000314184	0.000275891	-0.119659	0.138237	9.57e-41	2.6e-53	9.57e-41	-13.3667	15.3713	6459	6466
AAAGCAGA	TCTGCTTT	0.000184889	0.000187584	0.000186236	-0.0309071	0.0308697	6.36e-31	2.38e-31	6.36e-31	-11.5633	11.6473	9604	9675	0.000275308	0.000320624	0.000297966	-0.15283	0.16392	4.66e-46	2.4e-53	4.66e-46	-14.2483	15.3766	9752	9816	0.000163497	0.000167809	0.000165653	-0.0797056	0.0800729	1.45e-28	2.82e-29	1.45e-28	-11.0876	11.2329	9960	10043
AAAGCAGT	ACTGCTTT	0.000138018	0.000108512	0.000123265	-0.0320709	0.0283898	1.68e-23	8.14e-19	8.14e-19	-9.99046	8.85829	6790	6801	0.000662076	0.000768361	0.000715218	-0.289482	0.313288	3.44e-108	3e-125	3.44e-108	-22.0999	23.809	6666	6570	0.000518112	0.000775353	0.000646733	-0.172572	0.211553	1e-86	7.82e-129	1e-86	-19.7412	24.1528	6880	6814
AAAGCATT	AATGCTTT	0.000161652	0.000140361	0.000151006	-0.0309535	0.0288981	3.03e-27	7.16e-24	7.16e-24	-10.8122	10.0749	8219	8316	9.75e-05	0.000110394	0.000103967	-0.096898	0.103434	2.25e-17	1.86e-19	2.25e-17	-8.48012	9.02173	8421	8503	9.31e-05	9.68e-05	9.49e-05	-0.0637386	0.0651211	5.93e-17	1.47e-17	5.93e-17	-8.3669	8.52979	8712	8808
AAAGCCAA	TTGGCTTT	0.000120167	0.000144651	0.000132409	-0.0276044	0.0303433	1.15e-20	1.5e-24	1.15e-20	-9.32195	10.2277	7915	7877	0.00200161	0.00184693	0.00192427	-0.457469	0.441349	3.95252516672997e-323	2.53e-298	2.53e-298	-38.4518	36.9333	7994	7915	0.000555887	0.000476975	0.000516431	-0.162745	0.151785	6.56e-93	5.48e-80	5.48e-80	-20.4486	18.9409	8215	8095
AAAGCCAC	GTGGCTTT	1.83e-05	1.25e-05	1.54e-05	-0.0134909	0.011133	0.000272409	0.00261731	0.00261731	-3.64023	3.00945	4918	4939	0.000241199	0.000268303	0.000254751	-0.199414	0.209159	1.44e-40	6.25e-45	1.44e-40	-13.3362	14.0658	4967	5001	4.7e-05	4.43e-05	4.57e-05	-0.0598991	0.0577251	2.74e-09	7.9e-09	7.9e-09	-5.94657	5.77075	5028	5078
AAAGCCAG	CTGGCTTT	1.95e-05	1.52e-05	1.74e-05	-0.0116371	0.0103027	0.000172859	0.000901762	0.000901762	-3.75572	3.31952	7202	7235	0.000264366	0.000209227	0.000236797	-0.173299	0.154986	2.69e-44	2.03e-35	2.03e-35	-13.9622	12.4207	7253	7306	6.35e-05	9.95e-05	8.15e-05	-0.0576804	0.0726884	4.83e-12	5.16e-18	4.83e-12	-6.91047	8.65003	7370	7402
AAAGCCCA	TGGGCTTT	1.62e-05	4.26e-05	2.94e-05	-0.0122989	0.0196545	0.000613773	2.83e-08	0.000613773	-3.42547	5.5519	5423	5584	0.00044968	0.000389038	0.000419359	-0.262557	0.241214	4.36e-74	2.41e-64	2.41e-64	-18.2113	16.9384	5484	5633	0.000138746	0.000133414	0.00013608	-0.0990026	0.09604	1.73e-24	1.31e-23	1.31e-23	-10.2138	10.0157	5573	5709
AAAGCTAA	TTAGCTTT	0.000102158	7.69e-05	8.95e-05	-0.0297835	0.0264068	8.34e-18	8.93e-14	8.93e-14	-8.59501	7.45592	5754	5510	0.000167763	0.000140252	0.000154007	-0.15846	0.144014	9.88e-29	2.74e-24	2.74e-24	-11.1218	10.169	5574	5633	2.63e-05	3.23e-05	2.93e-05	-0.0421803	0.0465316	8.75e-06	8.35e-07	8.75e-06	-4.44596	4.92713	5773	5822
AAAGCTAG	CTAGCTTT	0.000125192	0.000102423	0.000113808	-0.0398209	0.0356261	1.82e-21	7.57e-18	7.57e-18	-9.51489	8.60614	3885	3951	0.00134916	0.00137493	0.00136204	-0.54179	0.540138	1.91e-218	1.41e-222	1.91e-218	-31.5586	31.8589	3764	3852	0.000810564	0.000880828	0.000845696	-0.282648	0.289713	1.35e-134	4.29e-146	1.35e-134	-24.6956	25.7446	3903	4011
AAAGCTGA	TCAGCTTT	0.000126244	5.53e-05	9.08e-05	-0.0301619	0.0196556	1.24e-21	2.54e-10	2.54e-10	-9.55476	6.32465	6995	7219	0.00145563	0.00121202	0.00133382	-0.416222	0.374441	1.58e-235	1.94e-196	1.94e-196	-32.7819	29.9096	7046	7251	0.000263909	0.000157712	0.000210811	-0.119813	0.091315	4.59e-45	1.3e-27	1.3e-27	-14.0875	10.8897	7226	7430
AAAGCTTA	NA	2.22e-05	NA	2.22e-05	-0.0154827	NA	6.21e-05	NA	6.21e-05	-4.00466	NA	4673	NA	0.000354017	NA	0.000354017	-0.248941	NA	1.02e-58	NA	1.02e-58	-16.1578	NA	4790	NA	0.000245065	NA	0.000245065	-0.13969	NA	5.69e-42	NA	5.69e-42	-13.5751	NA	4928	NA
AAAGCTTC	GAAGCTTT	4.85e-05	5.45e-05	5.15e-05	-0.0220471	0.0228792	3.17e-09	3.38e-10	3.17e-09	-5.92257	6.28053	5005	5278	0.000151197	0.000142877	0.000147037	-0.159507	0.156212	4.67e-26	1.03e-24	1.03e-24	-10.5584	10.2637	4956	4934	6.33e-05	8.24e-05	7.29e-05	-0.0700848	0.0803686	5.21e-12	3.55e-15	5.21e-12	-6.8998	7.87006	5038	5030
AAAGGAAA	TTTCCTTT	5.8e-06	9.37e-05	4.98e-05	-0.00323449	0.0136134	0.0405609	1.83e-16	0.0405609	-2.04799	8.23279	23709	21266	0.000710305	0.000687772	0.000699038	-0.152368	0.150933	6.24e-116	2.58e-112	2.58e-112	-22.8912	22.525	21129	21064	0.000376265	0.000403114	0.00038969	-0.0748697	0.078107	1.73e-63	6.89e-68	1.73e-63	-16.822	17.4121	21779	21679
AAAGGAAC	GTTCCTTT	6.06e-05	0.000107864	8.42e-05	-0.0227083	0.0294904	3.56e-11	1.03e-18	3.56e-11	-6.62139	8.83182	5944	6288	0.000957448	0.00101777	0.00098761	-0.36898	0.375008	1.36e-155	2.85e-165	1.36e-155	-26.5802	27.4056	5926	6109	0.000220992	0.000194802	0.000207897	-0.11999	0.11074	5.11e-38	1.03e-33	1.03e-33	-12.891	12.1029	6061	6278
AAAGGAGA	NA	6.69e-05	NA	6.69e-05	-0.0175781	NA	3.53e-12	NA	3.53e-12	-6.95504	NA	10671	NA	0.000139255	NA	0.000139255	-0.102884	NA	3.97e-24	NA	3.97e-24	-10.1328	NA	10808	NA	2.51e-05	NA	2.51e-05	-0.0295713	NA	1.42e-05	NA	1.42e-05	-4.34012	NA	11031	NA
AAAGGATA	TATCCTTT	6.25e-05	6.1e-05	6.18e-05	-0.0222183	0.0221603	1.77e-11	3.12e-11	3.12e-11	-6.72371	6.64069	6334	6188	0.000344525	0.000275094	0.000309809	-0.210454	0.189786	3.44e-57	5.05e-46	5.05e-46	-15.9396	14.2427	6449	6342	0.000120784	5.87e-05	8.97e-05	-0.0837661	0.0589598	1.58e-21	3.12e-11	3.12e-11	-9.5297	6.64067	6688	6562
AAAGGCAA	TTGCCTTT	8.64e-05	0.000142871	0.00011465	-0.0230237	0.0290571	2.67e-15	2.86e-24	2.67e-15	-7.90564	10.1646	8063	8471	0.000233509	0.000290009	0.000261759	-0.153361	0.167682	2.49e-39	2.01e-48	2.49e-39	-13.1218	14.6238	8163	8613	9.36e-05	0.000160943	0.00012725	-0.0655783	0.0843036	4.99e-17	3.81e-28	4.99e-17	-8.38705	11.0007	8377	8848
AAAGGCAC	GTGCCTTT	5.7e-05	7.93e-05	6.81e-05	-0.0261106	0.0309538	1.35e-10	3.73e-14	1.35e-10	-6.42136	7.5702	4232	4172	0.000141691	0.000243274	0.000192482	-0.167328	0.220237	1.6e-24	6.68e-41	1.6e-24	-10.221	13.3935	4262	4202	7.08e-05	0.000120663	9.58e-05	-0.0804384	0.105432	2.92e-13	1.66e-21	2.92e-13	-7.29813	9.52495	4320	4261
AAAGGCAG	CTGCCTTT	4.13e-05	9.32e-05	6.72e-05	-0.0149283	0.0233596	4.72e-08	2.21e-16	4.72e-08	-5.46158	8.21053	9309	8615	0.000287267	0.000255995	0.000271631	-0.166765	0.157173	5.55e-48	5.98e-43	5.98e-43	-14.5545	13.7393	8617	8702	0.000182349	7.92e-05	0.000130786	-0.0905531	0.0594151	1.15e-31	1.18e-14	1.18e-14	-11.7096	7.71781	8691	8827
AAAGTAAA	TTTACTTT	4.28e-05	6.88e-05	5.58e-05	-0.0129524	0.0165719	2.65e-08	1.78e-12	2.65e-08	-5.56308	7.05103	12322	12262	0.000277781	0.000326056	0.000301918	-0.132261	0.143544	1.86e-46	3.21e-54	1.86e-46	-14.3121	15.5063	12701	12850	0.000285041	0.000363277	0.000324159	-0.0898234	0.101532	1.57e-48	2.33e-61	1.57e-48	-14.6408	16.529	13240	13389
AAAGTACT	NA	0.000109937	NA	0.000109937	-0.0325865	NA	4.83e-19	NA	4.83e-19	-8.91626	NA	5170	NA	2.99e-05	NA	2.99e-05	-0.068013	NA	2.69e-06	NA	2.69e-06	-4.69284	NA	5367	NA	1.33e-05	NA	1.33e-05	-0.0306194	NA	0.00156576	NA	0.00156576	-3.16222	NA	5522	NA
AAAGTATA	NA	9.95e-05	NA	9.95e-05	-0.0260435	NA	2.2e-17	NA	2.2e-17	-8.48273	NA	7293	NA	9.47e-05	NA	9.47e-05	-0.0983321	NA	6.43e-17	NA	6.43e-17	-8.35734	NA	8083	NA	0.000188964	NA	0.000188964	-0.0929506	NA	9.36e-33	NA	9.36e-33	-11.9201	NA	8455	NA
AAAGTCAA	TTGACTTT	0.000159911	0.000115932	0.000137921	-0.0330338	0.0277528	5.71e-27	5.39e-20	5.39e-20	-10.7538	9.15619	7333	7516	0.000389446	0.00044307	0.000416258	-0.208256	0.220022	2.07e-64	5.02e-73	2.07e-64	-16.9473	18.0769	7491	7626	0.000426943	0.000383293	0.000405118	-0.146376	0.137134	8.59e-72	1.22e-64	1.22e-64	-17.9195	16.9784	7786	7955
AAAGTCCA	TGGACTTT	0.000136072	0.000141802	0.000138937	-0.0351773	0.0365266	3.43e-23	4.23e-24	3.43e-23	-9.91976	10.1265	5564	5349	0.000483917	0.000541141	0.000512529	-0.27747	0.292473	1.38e-79	8.93e-89	1.38e-79	-18.8922	19.9786	5287	5315	0.000523432	0.000629546	0.000576489	-0.194623	0.212867	1.35e-87	5.73e-105	1.35e-87	-19.8423	21.762	5448	5462
AAAGTGCT	AGCACTTT	0.00759875	0.00739152	0.00749513	-0.112869	0.11074	0	0	0	-74.4072	73.378	30565	31000	4.33e-07	7.86e-06	4.15e-06	0.00341002	-0.0145537	0.571993	0.0160756	0.571993	0.56512	-2.4072	31851	31830	0.00108596	0.000980286	0.00103312	-0.11665	0.111089	1.17e-179	2.28e-162	2.28e-162	-28.5885	27.1605	31944	31889
AAAGTGTT	AACACTTT	9.39e-05	9.86e-05	9.62e-05	-0.0228774	0.0230762	1.72e-16	3.08e-17	1.72e-16	-8.24046	8.44366	9120	9377	0.000114257	0.000148789	0.000131523	0.10175	-0.115884	4.39e-20	1.14e-25	4.39e-20	9.17823	-10.4739	9348	9346	3.62e-05	7.43e-05	5.52e-05	0.0386893	-0.0554752	1.84e-07	7.77e-14	1.84e-07	5.21499	-7.47426	9578	9538
AAAGTTAA	TTAACTTT	3.74e-05	0.000164501	0.000100947	-0.0148427	0.0294631	1.99e-07	1.07e-27	1.99e-07	-5.19986	10.9071	8372	9404	0.000257148	0.000180957	0.000219053	-0.155004	0.129549	3.9e-43	7.34e-31	7.34e-31	-13.7702	11.551	8742	8858	0.0002079	0.0002272	0.00021755	-0.0931074	0.0972392	7.23e-36	4.88e-39	7.23e-36	-12.5032	13.0708	9175	9253
AAAGTTCA	TGAACTTT	7.42e-05	0.000230372	0.000152292	-0.0245408	0.041024	2.38e-13	4.11e-38	2.38e-13	-7.3256	12.9078	6216	6906	0.00110893	0.0011824	0.00114566	-0.383779	0.398219	6.74e-180	1.09e-191	6.74e-180	-28.6078	29.5415	6319	6254	0.000165766	0.000229223	0.000197495	-0.0995919	0.117608	6.13e-29	2.27e-39	6.13e-29	-11.1643	13.1289	6571	6506
AAAGTTGA	NA	8.23e-05	NA	8.23e-05	-0.0267994	NA	1.22e-14	NA	1.22e-14	-7.71451	NA	5789	NA	0.000343265	NA	0.000343265	-0.220403	NA	5.48e-57	NA	5.48e-57	-15.9104	NA	5931	NA	0.000125911	NA	0.000125911	-0.0897992	NA	2.26e-22	NA	2.26e-22	-9.72989	NA	6141	NA
AAATAAAA	TTTTATTT	6.47e-05	4.96e-05	5.71e-05	-0.00709923	0.00622185	8.04e-12	2.13e-09	2.13e-09	-6.83802	5.98768	36889	37226	0.00307617	0.00300474	0.00304045	-0.187977	0.18616	0	0	0	-47.6943	47.1356	40319	40489	0.00257649	0.00272795	0.00265222	-0.11576	0.119735	0	0	0	-44.068	45.3482	42010	42224
AAATAAAC	GTTTATTT	0.0003131	0.000239107	0.000276103	-0.0358625	0.0310198	3.59e-51	1.71e-39	1.71e-39	-15.0486	13.1503	11944	12304	0.00191282	0.00156254	0.00173768	-0.353638	0.317215	0	1.1e-252	1.1e-252	-37.5877	33.9662	12507	12786	0.00120381	0.0010896	0.0011467	-0.188186	0.177753	6.08e-199	2.96e-180	2.96e-180	-30.1015	28.6364	13009	13312
AAATAAAG	CTTTATTT	0.000549566	0.000469441	0.000509503	-0.0423538	0.0391039	1.95e-88	8.14e-76	8.14e-76	-19.9396	18.4281	15047	15212	0.00263644	0.00266449	0.00265047	-0.371925	0.373546	0	0	0	-44.1443	44.3791	15573	15742	0.00199726	0.00208699	0.00204212	-0.217002	0.221771	0	0	0	-38.7882	39.6518	16244	16377
AAATAAAT	ATTTATTT	6.27e-05	2.27e-05	4.27e-05	0.00642736	-0.00388202	1.65e-11	5.01e-05	5.01e-05	6.73402	-4.05513	26374	26559	0.000727535	0.000667973	0.000697754	-0.0826717	0.0791197	1.07e-118	3.89e-109	3.89e-109	-23.1674	22.1981	29209	29197	0.00062067	0.00068716	0.000653915	-0.0516406	0.0543195	1.63e-103	2.12e-114	1.63e-103	-21.608	22.7367	30493	30470
AAATAACA	TGTTATTT	0.000100878	0.000286049	0.000193464	-0.0216921	0.0360066	1.33e-17	6.65e-47	1.33e-17	-8.54098	14.3837	10653	10821	0.00083526	0.000937538	0.000886399	-0.247274	0.260716	5.52e-136	2.13e-152	5.52e-136	-24.8247	26.3021	11265	11263	0.000579538	0.00076676	0.000673149	-0.137571	0.157292	8.8e-97	1.99e-127	8.8e-97	-20.8793	24.0185	11805	11843
AAATAACC	GGTTATTT	9.88e-05	0.000160494	0.000129647	-0.0304964	0.0385188	2.86e-17	4.62e-27	2.86e-17	-8.45252	10.7734	5307	5365	0.00133214	0.00131869	0.00132542	-0.455294	0.448032	1.03e-215	1.48e-213	1.48e-213	-31.3586	31.1997	5354	5436	0.000720944	0.000560556	0.00064075	-0.223913	0.196843	6.28e-120	1.13e-93	1.13e-93	-23.2893	20.5343	5611	5612
AAATAACT	AGTTATTT	0.000143126	0.000148732	0.000145929	-0.0270912	0.0282858	2.61e-24	3.37e-25	2.61e-24	-10.1737	10.371	9660	9280	0.000674898	0.000603863	0.00063938	-0.235287	0.227021	3.01e-110	7.6e-99	7.6e-99	-22.313	21.1054	10007	9712	0.000299318	0.000335019	0.000317169	-0.105023	0.113321	7.13e-51	9.97e-57	7.13e-51	-15.0031	15.8729	10448	10131
AAATAAGA	TCTTATTT	6.84e-05	8.88e-05	7.86e-05	-0.017295	0.0195892	2.06e-12	1.13e-15	2.06e-12	-7.0304	8.01202	11291	11363	0.000515478	0.000444657	0.000480068	-0.188622	0.173718	1.18e-84	2.79e-73	2.79e-73	-19.4989	18.1093	11876	12039	0.000420598	0.000321336	0.000370967	-0.114086	0.0989192	9.41e-71	1.75e-54	1.75e-54	-17.7858	15.5453	12395	12557
AAATAAGC	GCTTATTT	0.000131007	0.000125025	0.000128016	-0.0321815	0.0313614	2.18e-22	1.94e-21	1.94e-21	-9.73338	9.50854	6383	6398	0.000235674	0.000272684	0.000254179	-0.172432	0.18659	1.12e-39	1.23e-45	1.12e-39	-13.1826	14.1802	6663	6552	0.00017611	0.000220039	0.000198075	-0.100341	0.112481	1.22e-30	7.32e-38	1.22e-30	-11.5075	12.8631	6893	6817
AAATAATA	TATTATTT	8.9e-05	5.13e-05	7.01e-05	-0.0155852	0.0118882	1.04e-15	1.14e-09	1.14e-09	-8.02247	6.08789	17470	17412	0.000745621	0.000734102	0.000739861	-0.172718	0.172231	1.34e-121	9.46e-120	9.46e-120	-23.4538	23.2718	19651	19531	0.000679643	0.00058918	0.000634412	-0.110031	0.103108	3.61e-113	2.32e-98	2.32e-98	-22.6119	21.0524	20651	20453
AAATAATC	GATTATTT	0.000126667	0.000120086	0.000123376	-0.0289413	0.0279784	1.06e-21	1.18e-20	1.18e-20	-9.57078	9.31879	7494	7624	0.00014479	0.000201613	0.000173201	-0.122352	0.143784	5.06e-25	3.43e-34	5.06e-25	-10.3322	12.1926	7983	8081	0.00015278	0.000247942	0.000200361	-0.0842822	0.106806	8.41e-27	1.92e-42	8.41e-27	-10.7181	13.6546	8316	8434
AAATACAA	TTGTATTT	0.00627125	0.00633189	0.00630157	0.0962682	-0.0963749	0	0	0	67.5509	-67.8787	33803	34232	0.000900828	0.00074301	0.000821919	-0.145451	0.131603	1.66e-146	3.52e-121	3.52e-121	-25.7816	23.4127	35501	35877	5.23e-05	7.5e-05	6.37e-05	0.0238017	-0.0283693	3.54e-10	5.96e-14	3.54e-10	6.273	-7.50913	36057	36474
AAATACAC	GTGTATTT	4.04e-05	5.08e-05	4.56e-05	-0.0182227	0.0200946	6.45e-08	1.34e-09	6.45e-08	-5.40589	6.06258	6043	6197	0.000348051	0.000304985	0.000326518	-0.214431	0.198583	9.33e-58	7.84e-51	7.84e-51	-16.021	14.9968	6269	6399	0.000341735	0.000377446	0.000359591	-0.1429	0.148686	7.9e-58	1.11e-63	7.9e-58	-16.0313	16.8484	6500	6629
AAATACAG	CTGTATTT	5.21e-05	1.91e-05	3.56e-05	-0.0169932	0.0102148	8.29e-10	0.000201888	0.000201888	-6.13928	3.71666	9074	9139	0.00038955	0.000503986	0.000446768	-0.186049	0.210996	1.99e-64	8.26e-83	1.99e-64	-16.9496	19.2802	9411	9417	0.00022401	0.000329409	0.000276709	-0.0951433	0.114803	1.63e-38	8.29e-56	1.63e-38	-12.9787	15.7394	9694	9743
AAATACAT	ATGTATTT	8.25e-05	9.42e-05	8.83e-05	-0.0191801	0.0206555	1.14e-14	1.54e-16	1.14e-14	-7.7225	8.25386	10940	10965	0.000276419	0.000250406	0.000263413	-0.136709	0.13119	3.09e-46	4.75e-42	4.75e-42	-14.277	13.5884	11856	11912	0.000273113	0.000315422	0.000294267	-0.0905751	0.0983875	1.42e-46	1.63e-53	1.42e-46	-14.3311	15.4015	12486	12466
AAATACCA	TGGTATTT	0.000121793	0.000193658	0.000157725	-0.027664	0.0341737	6.32e-21	2.61e-32	6.32e-21	-9.38481	11.8344	8025	8314	0.000576156	0.000567398	0.000571777	-0.242107	0.236824	2.13e-94	5.43e-93	5.43e-93	-20.6152	20.4578	8262	8448	0.00029652	0.000390155	0.000343338	-0.117006	0.132425	2.05e-50	9.16e-66	2.05e-50	-14.9328	17.1298	8529	8691
AAATACCT	AGGTATTT	0.000343527	0.00043352	0.000388523	-0.0490682	0.0551883	5.7e-56	3.72e-70	5.7e-56	-15.7631	17.7087	7111	7197	0.00106474	0.00119366	0.0011292	-0.349684	0.36811	8.3e-173	1.71e-193	8.3e-173	-28.0314	29.6819	7284	7421	0.000494406	0.000509347	0.000501876	-0.159792	0.161962	7.66e-83	2.74e-85	7.66e-83	-19.2841	19.5734	7534	7659
AAATACTA	TAGTATTT	6.36e-05	4.81e-05	5.59e-05	-0.0211476	0.0186517	1.2e-11	3.63e-09	3.63e-09	-6.77975	5.9003	7081	6869	0.000238616	0.000243186	0.000240901	-0.16122	0.165485	3.75e-40	6.9e-41	3.75e-40	-13.2646	13.3911	7577	7348	0.000114641	0.000126796	0.000120718	-0.0747855	0.0798584	1.63e-20	1.61e-22	1.63e-20	-9.2842	9.76402	7935	7704
AAATACTG	CAGTATTT	4.59e-05	8.23e-05	6.41e-05	-0.0176574	0.0234478	8.34e-09	1.22e-14	8.34e-09	-5.7615	7.71443	7417	7499	0.000333909	0.000334523	0.000334216	-0.19013	0.189233	1.75e-55	1.4e-55	1.75e-55	-15.692	15.7064	7748	7775	0.000206373	0.000144964	0.000175668	-0.100849	0.0841293	1.29e-35	1.63e-25	1.63e-25	-12.4572	10.4402	7973	8022
AAATAGAA	TTCTATTT	1.91e-05	2.48e-05	2.2e-05	-0.00839372	0.00964138	0.000204667	2.25e-05	0.000204667	-3.7132	4.23841	13187	13106	0.000483082	0.00049877	0.000490926	-0.166888	0.171555	1.88e-79	5.68e-82	1.88e-79	-18.8759	19.1801	13990	13792	0.000511955	0.000531399	0.000521677	-0.114584	0.118153	1.02e-85	6.7e-89	1.02e-85	-19.6235	19.9929	14700	14493
AAATAGAC	GTCTATTT	0.000192162	0.000152641	0.000172402	-0.0432138	0.0385745	4.5e-32	8.1e-26	8.1e-26	-11.7886	10.5065	5086	5029	0.00123627	0.00115859	0.00119743	-0.446426	0.434609	2.49e-200	7.24e-188	7.24e-188	-30.2076	29.2422	5113	5037	0.000639693	0.000601076	0.000620385	-0.214215	0.208325	1.25e-106	2.62e-100	2.62e-100	-21.9368	21.264	5382	5305
AAATAGAG	CTCTATTT	6.01e-05	4.7e-05	5.35e-05	-0.0211647	0.0182	4.41e-11	5.57e-09	5.57e-09	-6.58976	5.82935	6741	7105	0.00028569	0.000310365	0.000298028	-0.186954	0.193882	9.96e-48	1.07e-51	9.96e-48	-14.5145	15.1285	6851	6872	0.000241205	0.00028763	0.000264418	-0.115263	0.125125	2.45e-41	5.89e-49	2.45e-41	-13.4677	14.7072	7124	7161
AAATAGAT	ATCTATTT	3.54e-05	5.56e-05	4.55e-05	-0.015524	0.0194834	4.21e-07	2.3e-10	4.21e-07	-5.05909	6.34015	7249	7197	0.000278237	0.000326175	0.000302206	-0.172431	0.188318	1.57e-46	3.07e-54	1.57e-46	-14.3239	15.5092	7642	7534	0.000240303	0.000217372	0.000228838	-0.107084	0.102685	3.44e-41	2.01e-37	2.01e-37	-13.4425	12.7849	8011	7917
AAATAGCC	GGCTATTT	5.18e-06	1.21e-06	3.19e-06	-0.0079101	0.00375319	0.0529208	0.350426	0.350426	-1.93557	0.933765	4190	4279	0.000308052	0.000279971	0.000294011	-0.245765	0.232075	2.52e-51	8.29e-47	8.29e-47	-15.072	14.3684	4297	4332	0.000156264	0.000126184	0.000141224	-0.1182	0.105225	2.25e-27	2.03e-22	2.03e-22	-10.8396	9.74044	4413	4449
AAATATAA	TTATATTT	1.19e-05	6.83e-06	9.38e-06	-0.00618809	0.00469295	0.00330265	0.0262804	0.0262804	-2.93808	2.22205	14810	14847	0.000309793	0.000287829	0.000298811	-0.118523	0.11483	1.32e-51	4.51e-48	4.51e-48	-15.1146	14.5688	16917	16919	0.000266976	0.000219034	0.000243005	-0.0729894	0.0663489	1.44e-45	1.07e-37	1.07e-37	-14.1691	12.8337	17863	17861
AAATATAT	ATATATTT	4.74e-05	1.42e-05	3.08e-05	-0.011159	0.00603665	4.82e-09	0.00132918	0.00132918	-5.85349	3.20962	17283	17196	0.000337811	0.000375561	0.000356686	-0.101799	0.112453	4.13e-56	3.53e-62	4.13e-56	-15.7835	16.6423	20399	20303	0.000234132	0.000228402	0.000231267	-0.0552953	0.0575737	3.55e-40	3.1e-39	3.1e-39	-13.2688	13.1053	21641	21453
AAATCAAA	TTTGATTT	0.000579116	0.000538701	0.000558909	-0.0464019	0.0444742	4.33e-93	1e-86	1e-86	-20.469	19.7414	12803	13102	0.00182806	0.00206221	0.00194513	-0.331789	0.351172	2.7e-295	0	2.7e-295	-36.7439	39.0307	13192	13418	0.00128215	0.00120855	0.00124535	-0.186177	0.180196	9.2e-212	1.02e-199	1.02e-199	-31.0669	30.1609	13760	13996
AAATCAAC	GTTGATTT	0.000355302	0.000281711	0.000318506	-0.0565332	0.0497687	7.93e-58	3.22e-46	3.22e-46	-16.0311	14.2742	5564	5700	0.00266818	0.00321644	0.00294231	-0.637611	0.695672	0	0	0	-44.4099	48.773	5476	5574	0.00158669	0.00173643	0.00166156	-0.326749	0.339573	1.35e-261	4.23e-286	1.35e-261	-34.5652	36.1622	5807	5899
AAATCAAG	CTTGATTT	0.000140316	9.78e-05	0.000119053	-0.0323569	0.026233	7.28e-24	4.14e-17	4.14e-17	-10.0733	8.40918	6753	7132	0.000427401	0.000539609	0.000483505	-0.227835	0.248086	1.65e-70	1.57e-88	1.65e-70	-17.7543	19.9503	6914	7311	0.000321373	0.000391133	0.000356253	-0.133084	0.142489	1.72e-54	6.33e-66	1.72e-54	-15.5462	17.1513	7140	7529
AAATCAAT	ATTGATTT	0.000589394	0.000576935	0.000583164	-0.0554955	0.0540692	1.04e-94	9.54e-93	9.54e-93	-20.6499	20.4304	9484	9742	0.00377852	0.00450074	0.00413963	-0.568407	0.612776	0	0	0	-52.878	57.7317	9629	9867	0.00263336	0.00288518	0.00275927	-0.31599	0.327144	0	0	0	-44.553	46.6405	10158	10362
AAATCACA	TGTGATTT	0.000431444	0.000354269	0.000392857	-0.0504948	0.0457721	7.9e-70	1.15e-57	1.15e-57	-17.6662	16.0078	8544	8482	0.00151457	0.00155496	0.00153477	-0.38245	0.388734	5.49e-245	1.81e-251	5.49e-245	-33.4401	33.8836	8694	8600	0.00115345	0.00109353	0.00112349	-0.224969	0.219538	1.06e-190	6.72e-181	6.72e-181	-29.4645	28.6881	8960	8883
AAATCACC	GGTGATTT	3.49e-05	3.37e-05	3.43e-05	-0.0195858	0.0191024	5.13e-07	8.07e-07	8.07e-07	-5.02159	4.93364	4445	4673	0.000247764	0.000188823	0.000218294	-0.2117	0.185174	1.26e-41	3.96e-32	3.96e-32	-13.5165	11.7994	4508	4648	0.000232726	0.00015131	0.000192018	-0.138921	0.112312	6.04e-40	1.47e-26	1.47e-26	-13.2289	10.6663	4611	4744
AAATCACT	NA	4.16e-05	NA	4.16e-05	-0.0174287	NA	4.13e-08	NA	4.13e-08	-5.48536	NA	6875	NA	0.000169578	NA	0.000169578	-0.142609	NA	5.03e-29	NA	5.03e-29	-11.1819	NA	6960	NA	0.00013582	NA	0.00013582	-0.0860768	NA	5.24e-24	NA	5.24e-24	-10.1055	NA	7174	NA
AAATCAGA	TCTGATTT	9.03e-05	4.13e-05	6.58e-05	-0.0228629	0.0153298	6.48e-16	4.63e-08	4.63e-08	-8.0802	5.46495	8666	8810	0.000544335	0.000600707	0.000572521	-0.228852	0.237849	2.74e-89	2.44e-98	2.74e-89	-20.0375	21.0501	8693	8878	0.000376296	0.00056378	0.000470038	-0.127872	0.154736	1.71e-63	3.34e-94	1.71e-63	-16.8227	20.5933	8994	9222
AAATCAGT	ACTGATTT	6.16e-05	7.75e-05	6.96e-05	-0.0211651	0.0235013	2.45e-11	7.14e-14	2.45e-11	-6.67636	7.48547	6901	7036	0.000231851	0.000237693	0.000234772	-0.165373	0.166372	4.61e-39	5.29e-40	4.61e-39	-13.0752	13.2389	7081	7180	0.000241532	0.000244118	0.000242825	-0.113238	0.113355	2.16e-41	8.14e-42	2.16e-41	-13.4769	13.5489	7370	7434
AAATCATA	TATGATTT	0.00017044	0.00016837	0.000169405	-0.0342468	0.0343323	1.23e-28	2.62e-28	2.62e-28	-11.1022	11.0346	7237	7192	0.000552923	0.000649995	0.000601459	-0.247246	0.269398	1.15e-90	2.99e-106	1.15e-90	-20.195	21.8972	7492	7490	0.000597879	0.000511667	0.000554773	-0.1717	0.159409	8.75e-100	1.14e-85	1.14e-85	-21.2073	19.618	7870	7873
AAATCATG	CATGATTT	0.000108121	0.000142025	0.000125073	-0.027166	0.0311932	9.4e-19	3.9e-24	9.4e-19	-8.8423	10.1345	7390	7385	0.000988043	0.00101921	0.00100363	-0.332953	0.338482	1.68e-160	1.67e-165	1.68e-160	-27.0019	27.425	7505	7414	0.000414698	0.000369338	0.000392018	-0.145643	0.137591	8.72e-70	2.36e-62	2.36e-62	-17.6606	16.6664	7710	7617
AAATCCAA	TTGGATTT	0.000120146	7.97e-05	9.99e-05	-0.0280819	0.022974	1.15e-20	3.14e-14	3.14e-14	-9.32115	7.59253	7423	7392	0.000464129	0.000481267	0.000472698	-0.223123	0.227675	2.08e-76	3.68e-79	2.08e-76	-18.5017	18.8404	7574	7561	0.000502394	0.000519924	0.000511159	-0.1562	0.159011	3.77e-84	5.07e-87	3.77e-84	-19.4393	19.7757	7822	7840
AAATCCAC	GTGGATTT	6.26e-05	7.66e-05	6.96e-05	-0.0274902	0.0304516	1.73e-11	9.8e-14	1.73e-11	-6.72688	7.44368	4198	4198	0.000296697	0.000330267	0.000313482	-0.243764	0.259895	1.69e-49	6.74e-55	1.69e-49	-14.7915	15.6062	4210	4133	0.00028993	0.000241041	0.000265485	-0.162859	0.149794	2.47e-49	2.61e-41	2.61e-41	-14.7659	13.4632	4319	4255
AAATCCAG	CTGGATTT	8.09e-05	4.45e-05	6.27e-05	-0.0245655	0.0184428	2.04e-14	1.41e-08	1.41e-08	-7.64807	5.67217	6751	6582	0.000317372	0.000322833	0.000320102	-0.197704	0.201473	7.99e-53	1.06e-53	7.99e-53	-15.2984	15.4295	6803	6673	0.000369851	0.000391127	0.000380489	-0.144726	0.149849	1.95e-62	6.34e-66	1.95e-62	-16.678	17.1511	6933	6838
AAATCCTA	TAGGATTT	6.92e-05	5.16e-05	6.04e-05	-0.02563	0.0219766	1.5e-12	1.02e-09	1.02e-09	-7.07429	6.10678	5297	5378	0.000229922	0.000259245	0.000244584	-0.18824	0.198613	9.43e-39	1.79e-43	9.43e-39	-13.0207	13.8262	5428	5510	0.000108867	0.000121581	0.000115224	-0.0873825	0.0914609	1.47e-19	1.17e-21	1.47e-19	-9.04733	9.56111	5588	5710
AAATCCTC	GAGGATTT	5.39e-05	2.29e-05	3.84e-05	-0.022974	0.0142484	4.23e-10	4.72e-05	4.72e-05	-6.24553	4.06915	5171	5715	0.000764355	0.000901723	0.000833039	-0.357993	0.386691	1.32e-124	1.19e-146	1.32e-124	-23.7469	25.7944	5028	5071	0.00067658	0.00056717	0.000621875	-0.22788	0.207871	1.15e-112	9.32e-95	9.32e-95	-22.5609	20.6552	5144	5172
AAATCCTT	AAGGATTT	1.13e-05	1.74e-05	1.43e-05	-0.00915036	0.0114401	0.00432667	0.000385479	0.00432667	-2.85332	3.54985	6808	6696	0.000186875	0.000222611	0.000204743	-0.151691	0.165355	8.16e-32	1.42e-37	8.16e-32	-11.7384	12.8119	6845	6819	0.000162435	0.000200983	0.000181709	-0.0952725	0.105972	2.16e-28	9.9e-35	2.16e-28	-11.0516	12.2934	7064	7021
AAATCTAA	TTAGATTT	9.36e-05	9.28e-05	9.32e-05	-0.0260974	0.0258396	1.89e-16	2.58e-16	2.58e-16	-8.22923	8.19149	6851	6873	0.000236031	0.000247528	0.00024178	-0.16446	0.168333	9.79e-40	1.38e-41	9.79e-40	-13.1925	13.5101	7228	7196	9.72e-05	7.14e-05	8.43e-05	-0.070834	0.0604378	1.24e-17	2.4e-13	2.4e-13	-8.5493	7.32477	7517	7537
AAATCTAC	GTAGATTT	4.63e-05	4.44e-05	4.53e-05	-0.02355	0.0224923	7.25e-09	1.48e-08	1.48e-08	-5.78502	5.66373	4202	4423	0.000244871	0.000259356	0.000252114	-0.219742	0.228145	3.69e-41	1.72e-43	3.69e-41	-13.4374	13.8292	4257	4186	3.6e-05	1.66e-05	2.63e-05	-0.0564778	0.0385661	1.98e-07	0.000418943	0.000418943	-5.20087	3.52787	4427	4373
AAATCTAG	CTAGATTT	5.15e-05	6.42e-05	5.78e-05	-0.0221776	0.0250099	1.06e-09	9.64e-12	1.06e-09	-6.10082	6.81184	5313	5191	0.000878309	0.000872604	0.000875457	-0.379639	0.377649	6.82e-143	5.61e-142	5.61e-142	-25.457	25.3741	5137	5152	0.000341666	0.000383109	0.000362387	-0.159325	0.168308	8.11e-58	1.31e-64	8.11e-58	-16.0296	16.9744	5315	5335
AAATGAAA	TTTCATTT	0.000300724	0.000341355	0.000321039	-0.0248715	0.0264634	3.22e-49	1.25e-55	3.22e-49	-14.7481	15.7132	19619	20505	0.000764254	0.000790348	0.000777301	-0.169137	0.170756	1.37e-124	8.89e-129	1.37e-124	-23.7453	24.1476	20343	20520	0.000607066	0.000640745	0.000623906	-0.100137	0.102706	2.74e-101	8.41e-107	2.74e-101	-21.3697	21.9549	21291	21440
AAATGAAC	GTTCATTT	8.05e-05	5.01e-05	6.53e-05	-0.024603	0.0191369	2.33e-14	1.75e-09	1.75e-09	-7.63121	6.01955	6688	6881	0.000281314	0.000296215	0.000288765	-0.185886	0.188278	5.04e-47	2.02e-49	5.04e-47	-14.4029	14.7795	6832	7008	0.000126487	0.000120656	0.000123572	-0.0837985	0.0807585	1.81e-22	1.66e-21	1.66e-21	-9.75214	9.52468	7072	7269
AAATGAAG	CTTCATTT	8.75e-05	8.6e-05	8.68e-05	-0.019495	0.0193702	1.83e-15	3.08e-15	3.08e-15	-7.95274	7.88794	11376	11402	0.000946296	0.00104509	0.000995693	-0.261296	0.275353	8.4e-154	1.18e-169	8.4e-154	-26.4248	27.7713	11480	11443	0.000309288	0.000277536	0.000293412	-0.100551	0.0956181	1.65e-52	2.67e-47	2.67e-47	-15.251	14.4467	11866	11804
AAATGACA	TGTCATTT	1.99e-05	4.44e-05	3.21e-05	-0.0104103	0.0154922	0.000151471	1.45e-08	0.000151471	-3.78866	5.6673	9166	9192	0.00017588	0.000194655	0.000185268	-0.124602	0.13063	4.84e-30	4.54e-33	4.84e-30	-11.3878	11.9803	9428	9448	0.000140186	0.000144089	0.000142138	-0.0748014	0.0755827	9.99e-25	2.27e-25	9.99e-25	-10.2667	10.4087	9763	9792
AAATGACC	GGTCATTT	2.92e-05	2.57e-05	2.75e-05	-0.0181279	0.0169222	4.33e-06	1.61e-05	1.61e-05	-4.59481	4.31293	4487	4540	0.000269415	0.000289909	0.000279662	-0.223363	0.231157	4.14e-45	2.09e-48	4.14e-45	-14.0949	14.6213	4537	4561	5.84e-05	8.3e-05	7.07e-05	-0.0704311	0.0833987	3.48e-11	2.8e-15	3.48e-11	-6.6248	7.89979	4633	4702
AAATGACG	NA	7.74e-05	NA	7.74e-05	-0.0593286	NA	7.24e-14	NA	7.24e-14	-7.48352	NA	1119	NA	3.42e-05	NA	3.42e-05	-0.159091	NA	5.18e-07	NA	5.18e-07	-5.01959	NA	1147	NA	3.66e-05	NA	3.66e-05	-0.111163	NA	1.59e-07	NA	1.59e-07	-5.24218	NA	1174	NA
AAATGATA	TATCATTT	1.94e-05	5.52e-05	3.73e-05	-0.0103505	0.0175419	0.000183156	2.63e-10	0.000183156	-3.7412	6.31951	8861	8890	0.000488313	0.000368359	0.000428336	-0.208247	0.181878	2.72e-80	5.07e-61	5.07e-61	-18.9779	16.4819	9202	9163	0.000222569	0.000192168	0.000207369	-0.093973	0.0874728	2.81e-38	2.78e-33	2.78e-33	-12.9369	12.0207	9631	9643
AAATGCAA	TTGCATTT	0.00013968	0.000166647	0.000153164	-0.023784	0.0256909	9.18e-24	4.9e-28	9.18e-24	-10.0505	10.978	12387	12444	0.00135329	0.00139426	0.00137378	-0.299582	0.302175	4.16e-219	1.11e-225	4.16e-219	-31.6069	32.0824	12609	12534	0.00064123	0.000546816	0.000594023	-0.138468	0.12712	7e-107	2e-91	2e-91	-21.9632	20.281	13094	13026
AAATGCCC	GGGCATTT	7.73e-05	0.000102639	9e-05	-0.0277483	0.0318127	7.58e-14	7e-18	7.58e-14	-7.47755	8.6152	4991	5103	0.00135212	0.00135082	0.00135147	-0.481201	0.47768	6.43e-219	1.04e-218	1.04e-218	-31.5932	31.578	4878	4990	0.000589644	0.000622034	0.000605839	-0.215113	0.219086	1.95e-98	9.72e-104	1.95e-98	-21.0607	21.6317	4989	5122
AAATGCTC	GAGCATTT	4.48e-05	7.2e-05	5.84e-05	-0.0191829	0.024193	1.24e-08	5.37e-13	1.24e-08	-5.69443	7.21574	6119	6179	0.00139929	0.00116898	0.00128413	-0.437738	0.397568	1.73e-226	1.56e-189	1.56e-189	-32.1404	29.373	6112	6148	0.000446546	0.000309742	0.000378144	-0.167163	0.138686	5.28e-75	1.39e-52	1.39e-52	-18.3265	15.2622	6263	6298
AAATGCTG	CAGCATTT	0.000114587	0.000154097	0.000134342	-0.0249533	0.0288099	8.82e-20	4.76e-26	8.82e-20	-9.1029	10.5565	9343	9405	0.000273668	0.000330844	0.000302256	-0.156305	0.171207	8.56e-46	5.45e-55	8.56e-46	-14.2057	15.6198	9468	9516	0.000104566	9.1e-05	9.78e-05	-0.0655008	0.0608683	7.54e-19	1.34e-16	1.34e-16	-8.86681	8.26998	9650	9700
AAATGGAA	TTCCATTT	0.000181181	0.000189321	0.000185251	-0.0247074	0.0252889	2.46e-30	1.27e-31	2.46e-30	-11.4468	11.7012	14267	13977	0.0020847	0.0023227	0.0022037	-0.34588	0.368658	0	0	0	-39.2434	41.428	14242	14050	0.000325666	0.00042433	0.000374998	-0.0916892	0.105692	3.41e-55	2.3e-71	3.41e-55	-15.6497	17.8646	14821	14587
AAATGGCC	GGCCATTT	0.000132887	5.41e-05	9.35e-05	-0.0367055	0.0231247	1.1e-22	4.05e-10	4.05e-10	-9.80296	6.25208	4977	5092	0.00219026	0.00267475	0.00243251	-0.608484	0.666113	0	0	0	-40.2269	44.4647	4968	5056	0.000306669	0.000336579	0.000321624	-0.153843	0.15956	4.44e-52	5.53e-57	4.44e-52	-15.1863	15.9098	5103	5194
AAATGTAA	TTACATTT	0.000141196	0.000143722	0.000142459	-0.0234152	0.0235133	5.28e-24	2.1e-24	5.28e-24	-10.1048	10.1949	12532	12684	0.00168572	0.0018504	0.00176806	-0.324722	0.339363	1.89e-272	7.03e-299	1.89e-272	-35.2818	36.9681	12977	13088	0.000883028	0.000965323	0.000924175	-0.156635	0.163497	1.87e-146	6.4e-160	1.87e-146	-25.7768	26.9523	13675	13756
AAATGTGT	ACACATTT	2.11e-05	4.62e-05	3.36e-05	0.0108228	-0.0160123	9.51e-05	7.6e-09	9.51e-05	3.90291	-5.77719	8935	8919	0.000239388	0.00024368	0.000241534	0.146538	-0.147001	2.82e-40	5.74e-41	2.82e-40	13.286	-13.4046	9236	9310	0.000232127	0.000269966	0.000251047	0.0969985	-0.103998	7.58e-40	4.66e-46	7.58e-40	13.2118	-14.2483	9587	9658
AAATTAAA	TTTAATTT	8.17e-05	9.82e-05	9e-05	-0.0134804	0.0148437	1.49e-14	3.56e-17	1.49e-14	-7.68832	8.42676	19677	19634	0.000822536	0.000765909	0.000794222	-0.164219	0.160246	6.07e-134	7.43e-125	7.43e-125	-24.6348	23.771	21598	21497	0.000850422	0.0008475	0.000848961	-0.111314	0.112512	4.06e-141	1.22e-140	1.22e-140	-25.296	25.2524	22735	22583
AAATTAAC	GTTAATTT	7.14e-05	5.89e-05	6.51e-05	-0.0217497	0.0196607	6.78e-13	6.78e-11	6.78e-11	-7.18385	6.52548	7515	7598	0.000875046	0.00110218	0.000988613	-0.304669	0.340187	2.28e-142	8.15e-179	2.28e-142	-25.4096	28.5206	7834	7903	0.000434685	0.000549204	0.000491945	-0.143673	0.160584	4.63e-73	8.14e-92	4.63e-73	-18.0814	20.3252	8197	8273
AAATTAAG	CTTAATTT	4.72e-05	4.71e-05	4.71e-05	-0.0171252	0.0169352	5.17e-09	5.42e-09	5.42e-09	-5.8417	5.83368	8004	8164	0.000340957	0.000262	0.000301479	-0.182858	0.158749	1.29e-56	6.46e-44	6.46e-44	-15.8568	13.8995	8454	8597	0.000312649	0.000271872	0.000292261	-0.116956	0.108019	4.64e-53	2.27e-46	2.27e-46	-15.3337	14.2985	8857	9034
AAATTAAT	ATTAATTT	5.76e-05	3.2e-05	4.48e-05	-0.0153405	0.011421	1.09e-10	1.52e-06	1.52e-06	-6.45412	4.80816	12050	12121	0.000729804	0.000702628	0.000716216	-0.211509	0.207136	4.63e-119	1.06e-114	1.06e-114	-23.2035	22.7671	13294	13412	0.000348189	0.000354537	0.000351363	-0.0975675	0.0981577	6.91e-59	6.3e-60	6.91e-59	-16.182	16.3289	13942	14105
AAATTACA	TGTAATTT	4.42e-05	5.08e-05	4.75e-05	-0.0160729	0.0172764	1.6e-08	1.37e-09	1.6e-08	-5.65056	6.0593	8546	8457	0.000150412	0.000165794	0.000158103	-0.117162	0.123535	6.25e-26	2.05e-28	6.25e-26	-10.5309	11.0564	9085	8979	0.000125974	0.000177086	0.00015153	-0.0718274	0.0855594	2.2e-22	8.41e-31	2.2e-22	-9.73233	11.5393	9477	9363
AAATTAGA	TCTAATTT	2.53e-05	1.93e-05	2.23e-05	-0.0123188	0.0107603	1.92e-05	0.000190026	0.000190026	-4.27376	3.73194	8283	8292	0.000338406	0.000415532	0.000376969	-0.18064	0.19961	3.31e-56	1.33e-68	3.31e-56	-15.7974	17.5059	8591	8660	0.000393928	0.000353895	0.000373912	-0.130225	0.12303	2.21e-66	8.02e-60	8.02e-60	-17.2125	16.3141	9021	9083
AAATTAGC	GCTAATTT	0.0111299	0.0115246	0.0113273	0.14003	-0.142074	0	0	0	90.2121	-91.8158	29035	29233	9.6e-05	6.59e-05	8.09e-05	-0.051828	0.0428037	4.02e-17	3.16e-12	3.16e-12	-8.4124	6.97041	30521	30725	0.000511957	0.00055272	0.000532338	0.0817173	-0.0846679	1.02e-85	2.16e-92	1.02e-85	19.6235	-20.3902	30652	30839
AAATTATA	TATAATTT	3.18e-05	4.56e-05	3.87e-05	-0.0115992	0.0139082	1.6e-06	9.29e-09	1.6e-06	-4.79818	5.74324	11574	11530	0.000237452	0.000353783	0.000295618	-0.119529	0.145246	5.78e-40	1.12e-58	5.78e-40	-13.2322	16.1524	13157	13120	0.000260465	0.000305094	0.00028278	-0.0828761	0.0895538	1.69e-44	8.05e-52	1.69e-44	-13.9952	15.1472	14021	13929
AAATTCAA	TTGAATTT	0.000243121	0.000225023	0.000234072	-0.033262	0.0320904	3.98e-40	2.87e-37	2.87e-37	-13.2603	12.757	10824	10857	0.00140241	0.00143351	0.00141796	-0.32015	0.324659	5.46e-227	5.59e-232	5.46e-227	-32.1762	32.5315	11213	11245	0.00112639	0.00101847	0.00107243	-0.19235	0.183183	2.82e-186	1.29e-168	1.29e-168	-29.1165	27.685	11685	11743
AAATTCAC	GTGAATTT	5.82e-05	8.89e-05	7.36e-05	-0.0223093	0.0271002	8.65e-11	1.06e-15	8.65e-11	-6.48895	8.01984	5856	6106	0.000938813	0.00093793	0.000938371	-0.362938	0.357259	1.33e-152	1.85e-152	1.85e-152	-26.32	26.3076	5950	6172	0.000518207	0.000574507	0.000546357	-0.181111	0.187736	9.69e-87	5.86e-96	9.69e-87	-19.743	20.7884	6173	6416
AAATTCCT	AGGAATTT	2.21e-05	2.12e-05	2.16e-05	-0.011401	0.0110833	6.36e-05	9.17e-05	9.17e-05	-3.99897	3.91161	8599	8677	0.000347654	0.000456672	0.000402163	-0.182428	0.207769	1.08e-57	3.28e-75	1.08e-57	-16.0118	18.3524	8786	8869	0.000201859	0.000221866	0.000211863	-0.0936872	0.0975703	7.11e-35	3.67e-38	7.11e-35	-12.3202	12.9164	9062	9155
AAATTCTA	TAGAATTT	4.74e-05	2.64e-05	3.69e-05	-0.0171509	0.0127762	4.88e-09	1.26e-05	1.26e-05	-5.85144	4.36778	8085	8088	0.00024352	0.000291175	0.000267348	-0.154017	0.167883	6.09e-41	1.31e-48	6.09e-41	-13.4002	14.6532	8580	8593	0.000107417	0.00011647	0.000111943	-0.068481	0.0711203	2.55e-19	8.15e-21	2.55e-19	-8.98688	9.35796	8954	8975
AAATTGAA	TTCAATTT	5.52e-05	7.45e-05	6.48e-05	-0.0173759	0.0199418	2.68e-10	2.13e-13	2.68e-10	-6.31646	7.34067	8992	9184	0.000402335	0.000405227	0.000403781	-0.188335	0.187019	1.76e-66	6.03e-67	1.76e-66	-17.2256	17.2874	9341	9497	0.00019403	0.000201102	0.000197566	-0.087138	0.0878432	1.38e-33	9.47e-35	1.38e-33	-12.0789	12.2971	9844	10004
AAATTGAC	GTCAATTT	0.000167255	0.000135674	0.000151465	-0.0403079	0.0367365	3.93e-28	3.96e-23	3.96e-23	-10.998	9.90526	5177	5047	0.00494036	0.00569034	0.00531535	-0.911709	0.990807	0	0	0	-60.4988	64.9532	4981	4837	0.00191463	0.00219454	0.00205458	-0.376316	0.409306	2.88892159274632e-315	0	2.88892159274632e-315	-37.9758	40.6629	5301	5132
AAATTTAC	GTAAATTT	1.74e-05	5.87e-05	3.81e-05	-0.0113433	0.0207383	0.000389532	7.17e-11	0.000389532	-3.54709	6.51715	6813	6898	0.00098885	0.000884468	0.000936659	-0.339898	0.321029	1.25e-160	7e-144	7e-144	-27.013	25.5462	7178	7210	0.000224844	0.000141369	0.000183106	-0.10856	0.085959	1.19e-38	6.38e-25	6.38e-25	-13.0029	10.3099	7501	7529
AAATTTCA	NA	4.69e-05	NA	4.69e-05	-0.0152461	NA	5.7e-09	NA	5.7e-09	-5.82527	NA	10086	NA	0.000201879	NA	0.000201879	-0.126077	NA	3.11e-34	NA	3.11e-34	-12.2006	NA	10545	NA	0.000128889	NA	0.000128889	-0.0673843	NA	7.28e-23	NA	7.28e-23	-9.84431	NA	11021	NA
AACAAAAA	TTTTTGTT	3.52e-05	3.78e-05	3.65e-05	0.00682252	-0.0070453	4.58e-07	1.74e-07	4.58e-07	5.04296	-5.22548	25696	26082	0.00372982	0.00370422	0.00371702	-0.282921	0.281406	0	0	0	-52.5349	52.3536	26525	26781	0.00295844	0.00278273	0.00287058	-0.170051	0.164508	0	0	0	-47.2306	45.8025	27422	27706
AACAAAAC	GTTTTGTT	2.98e-06	1.74e-06	2.36e-06	0.00241583	-0.00186094	0.141807	0.262403	0.262403	1.4691	-1.12073	12447	12615	0.00120997	0.00117177	0.00119087	-0.197795	0.19603	4.14e-196	5.56e-190	5.56e-190	-29.8842	29.4082	12703	12809	0.000962265	0.00111953	0.0010409	-0.119435	0.129632	2.03e-159	3.75e-185	2.03e-159	-26.9095	29.0275	13072	13215
AACAAAAG	CTTTTGTT	0.00023572	0.000171703	0.000203711	-0.0333684	0.0281701	5.87e-39	7.76e-29	7.76e-29	-13.0568	11.1433	10520	10742	0.00223682	0.0024718	0.00235431	-0.416645	0.436494	0	0	0	-40.6532	42.7402	10652	10737	0.000908627	0.000934726	0.000921677	-0.178596	0.180439	1.21e-150	6.5e-155	1.21e-150	-26.1481	26.5213	11038	11125
AACAAAAT	ATTTTGTT	0.000445598	0.000450227	0.000447913	-0.0382183	0.0380155	4.65e-72	8.67e-73	4.65e-72	-17.9538	18.0469	14904	15166	0.00200278	0.00243888	0.00222083	-0.32556	0.356473	1.97626258336499e-323	0	1.97626258336499e-323	-38.4631	42.4539	15360	15583	0.00162907	0.0018892	0.00175914	-0.19612	0.208866	1.57e-268	4.18508490926867e-311	1.57e-268	-35.0246	37.7224	16114	16410
AACAAACA	TGTTTGTT	3.46e-06	8.4e-06	5.93e-06	0.00214786	-0.00334153	0.113681	0.0137283	0.113681	1.58186	-2.4643	14456	14616	0.00192602	0.00182479	0.00187541	-0.206878	0.200564	5.12147439978604e-311	9.03e-295	9.03e-295	-37.7174	36.711	14565	14759	0.00123139	0.00132084	0.00127611	-0.112044	0.115625	1.86e-203	4.31e-218	1.86e-203	-30.4449	31.5327	15003	15165
AACAAACC	GGTTTGTT	0.000508384	0.000575009	0.000541697	-0.0663486	0.070262	5.97e-82	1.92e-92	5.97e-82	-19.1776	20.3962	5616	5636	0.000803142	0.000886174	0.000844658	-0.337042	0.350459	7.87e-131	3.73e-144	7.87e-131	-24.3424	25.5708	5730	5821	0.000455208	0.000607295	0.000531251	-0.17186	0.196046	2.01e-76	2.51e-101	2.01e-76	-18.5035	21.3738	5858	5975
AACAAACT	AGTTTGTT	0.000162893	0.000134404	0.000148648	-0.0354203	0.0322872	1.93e-27	6.3e-23	6.3e-23	-10.8536	9.85876	6509	6481	0.00127728	0.00125907	0.00126818	-0.40766	0.405495	6.56e-207	5.46e-204	5.46e-204	-30.7052	30.4854	6401	6429	0.000659469	0.000706092	0.00068278	-0.195654	0.203689	7.24e-110	1.69e-117	7.24e-110	-22.2736	23.048	6726	6694
AACAAAGA	TCTTTGTT	0.000228523	0.000248186	0.000238354	-0.0330136	0.03445	8.05e-38	6.31e-41	8.05e-38	-12.8559	13.3977	10401	10371	0.00388804	0.00348051	0.00368428	-0.557299	0.529886	0	0	0	-53.6419	50.7424	10349	10254	0.00193816	0.00172197	0.00183006	-0.263648	0.248975	4.06724720969431e-319	9.83e-284	9.83e-284	-38.2089	36.011	10784	10726
AACAAAGC	GCTTTGTT	0.000258533	0.000376326	0.00031743	-0.0430724	0.0509189	1.47e-42	3.84e-61	1.47e-42	-13.6742	16.4988	6995	7313	0.00427822	0.00405206	0.00416514	-0.720452	0.690158	0	0	0	-56.2801	54.7661	6883	7152	0.000567966	0.000655166	0.000611566	-0.177423	0.187427	6.9e-95	3.67e-109	6.9e-95	-20.6697	22.2007	7066	7329
AACAAAGG	CCTTTGTT	0.000177188	0.000217588	0.000197388	-0.038328	0.0411296	1.05e-29	4.3e-36	1.05e-29	-11.3199	12.5445	6043	6455	0.00039741	0.000404724	0.000401067	-0.234098	0.230139	1.09e-65	7.27e-67	1.09e-65	-17.1198	17.2767	6069	6399	0.000369601	0.000251464	0.000310532	-0.152445	0.122217	2.14e-62	5.07e-43	5.07e-43	-16.6723	13.7512	6227	6585
AACAAAGT	ACTTTGTT	3.4e-05	4.08e-05	3.74e-05	-0.0161555	0.0177586	7.18e-07	5.68e-08	7.18e-07	-4.95651	5.42864	6566	6513	0.000229161	0.000280331	0.000254746	-0.168709	0.187977	1.25e-38	7.25e-47	1.25e-38	-12.9991	14.3777	6766	6663	0.000169074	0.000220797	0.000194936	-0.0973329	0.112201	1.75e-29	5.5e-38	1.75e-29	-11.2752	12.8853	7029	6903
AACAAATA	TATTTGTT	0.000134931	0.000118985	0.000126958	-0.0244045	0.022606	5.2e-23	1.76e-20	1.76e-20	-9.87807	9.27599	11158	11477	0.000586555	0.00060828	0.000597418	-0.202079	0.203565	4.56e-96	1.48e-99	4.56e-96	-20.8005	21.1825	11759	12021	0.000653579	0.00052102	0.0005873	-0.143018	0.12612	6.67e-109	3.36e-87	3.36e-87	-22.1738	19.7965	12245	12547
AACAAATC	GATTTGTT	0.000170691	0.000149702	0.000160197	-0.0413052	0.0382499	1.12e-28	2.37e-25	2.37e-25	-11.1104	10.4048	5029	5166	0.000602311	0.0006473	0.000624806	-0.314104	0.322011	1.35e-98	8.09e-106	1.35e-98	-21.0782	21.8517	5113	5250	0.000464549	0.000332665	0.000398607	-0.185552	0.154739	5.94e-78	2.42e-56	2.42e-56	-18.6924	15.817	5295	5467
AACAAATG	CATTTGTT	0.000260171	0.000292575	0.000276373	-0.0363585	0.0384403	8.08e-43	6.21e-48	8.08e-43	-13.7175	14.5469	9874	9961	0.00248532	0.00219322	0.00233927	-0.457256	0.426871	0	0	0	-42.8572	40.2541	9934	10079	0.000836731	0.000667241	0.000751986	-0.178044	0.158412	7.06e-139	3.87e-111	3.87e-111	-25.0913	22.4045	10318	10424
AACAAATT	AATTTGTT	8.58e-05	0.000104769	9.53e-05	-0.0208583	0.0230381	3.4e-15	3.21e-18	3.4e-15	-7.87528	8.70415	9884	9911	0.00138898	0.00144574	0.00141736	-0.33654	0.344579	7.8e-225	6.11e-234	7.8e-225	-32.0216	32.6701	10222	10178	0.000622202	0.00058573	0.000603966	-0.150781	0.146546	9.12e-104	8.52e-98	8.52e-98	-21.6347	20.9906	10687	10672
AACAACAA	TTGTTGTT	1.29e-05	2.21e-05	1.75e-05	0.00421224	-0.00539791	0.00224058	6.39e-05	0.00224058	3.05635	-3.99803	9286	9520	0.00129466	0.00140669	0.00135067	-0.173296	0.176191	1.07e-209	1.13e-227	1.07e-209	-30.9137	32.2253	9435	9659	0.000870473	0.00082269	0.000846582	-0.0957168	0.0912295	2.12e-144	1.4e-136	1.4e-136	-25.5927	24.8798	9754	9980
AACAACAC	GTGTTGTT	0.000185587	0.000104775	0.000145181	-0.048732	0.0363373	4.93e-31	3.2e-18	3.2e-18	-11.5852	8.70442	3788	3852	0.00059519	0.00056978	0.000582485	-0.355985	0.351398	1.87e-97	2.25e-93	2.25e-93	-20.9532	20.5007	3822	3853	0.0003856	0.000522247	0.000453924	-0.193757	0.224278	5.11e-65	2.11e-87	5.11e-65	-17.0295	19.8199	3920	3994
AACAACAG	CTGTTGTT	0.000130951	0.000132695	0.000131823	-0.0308141	0.030609	2.22e-22	1.18e-22	2.22e-22	-9.73131	9.7959	6984	7080	0.00139034	0.00132967	0.00136001	-0.408509	0.396694	4.73e-225	2.56e-215	2.56e-215	-32.0372	31.3295	7024	7092	0.000622758	0.000680232	0.000651495	-0.184887	0.192432	7.4e-104	2.89e-113	7.4e-104	-21.6443	22.6217	7192	7217
AACAACAT	ATGTTGTT	6.97e-05	4.93e-05	5.95e-05	-0.0256406	0.0211581	1.27e-12	2.36e-09	2.36e-09	-7.0979	5.971	5333	5469	0.000463892	0.000437957	0.000450924	-0.266626	0.255961	2.27e-76	3.33e-72	3.33e-72	-18.497	17.9723	5482	5577	0.000257306	0.000342445	0.000299876	-0.133362	0.151417	5.57e-44	6.04e-58	5.57e-44	-13.9101	16.0479	5689	5818
AACAACCA	TGGTTGTT	9.17e-05	3.7e-05	6.43e-05	-0.032355	0.0203055	3.89e-16	2.32e-07	2.32e-07	-8.1422	5.17159	4399	4488	0.000995195	0.000895428	0.000945311	-0.435276	0.407807	1.2e-161	1.22e-145	1.22e-145	-27.0996	25.7041	4400	4486	0.000464518	0.000364745	0.000414631	-0.200674	0.175513	6.01e-78	1.34e-61	1.34e-61	-18.6918	16.5624	4520	4622
AACAACCC	GGGTTGTT	4.72e-05	8.18e-05	6.45e-05	-0.024551	0.0322548	5.21e-09	1.45e-14	5.21e-09	-5.84026	7.69177	3957	3999	0.00206138	0.00212204	0.00209171	-0.660538	0.672109	0	0	0	-39.0229	39.5941	3979	3978	0.00044823	0.000447176	0.000447703	-0.209231	0.209193	2.8e-75	4.17e-75	4.17e-75	-18.361	18.3394	4040	4054
AACAACCT	AGGTTGTT	8.07e-05	6.72e-05	7.39e-05	-0.0325968	0.0299775	2.2e-14	3.14e-12	3.14e-12	-7.63823	6.97133	3837	3778	0.00103083	0.0014138	0.00122232	-0.483717	0.571036	2.29e-167	8.12e-229	2.29e-167	-27.581	32.3068	3714	3654	0.00069532	0.000850841	0.00077308	-0.265774	0.296937	9.81e-116	3.46e-141	9.81e-116	-22.8714	25.3022	3881	3806
AACAACTA	TAGTTGTT	2.81e-05	4.31e-05	3.56e-05	-0.0197283	0.0242332	6.58e-06	2.39e-08	6.58e-06	-4.50701	5.5811	3592	3705	0.000267667	0.000251812	0.00025974	-0.245213	0.235584	7.91e-45	2.82e-42	2.82e-42	-14.0491	13.6265	3690	3822	0.000124014	9.86e-05	0.000111331	-0.1118	0.0990132	4.63e-22	7.18e-18	7.18e-18	-9.65633	8.61222	3852	3964
AACAACTG	NA	1.09e-05	NA	1.09e-05	-0.0114277	NA	0.00493378	NA	0.00493378	-2.81133	NA	4224	NA	0.000235814	NA	0.000235814	-0.215891	NA	1.06e-39	NA	1.06e-39	-13.1865	NA	4267	NA	5.67e-05	NA	5.67e-05	-0.071197	NA	6.73e-11	NA	6.73e-11	-6.52667	NA	4401	NA
AACAAGAA	TTCTTGTT	8.35e-05	5.73e-05	7.04e-05	-0.0221753	0.0181789	7.94e-15	1.2e-10	1.2e-10	-7.76877	6.43939	8384	8617	0.0024132	0.00225437	0.00233379	-0.48367	0.461623	0	0	0	-42.2293	40.8127	8482	8737	0.000842417	0.000691124	0.000766771	-0.191868	0.172232	8.28e-140	4.77e-115	4.77e-115	-25.1765	22.8022	8816	9020
AACAAGAC	GTCTTGTT	6.61e-06	5.93e-06	6.27e-06	-0.00873913	0.00840193	0.0287831	0.0383838	0.0383838	-2.18645	2.07074	4353	4266	0.000542302	0.000468067	0.000505184	-0.330706	0.306355	5.81e-89	4.85e-77	4.85e-77	-20	18.5801	4150	4220	0.000183107	0.000174061	0.000178584	-0.130162	0.125718	8.6e-32	2.65e-30	2.65e-30	-11.7339	11.4403	4242	4361
AACAAGAG	CTCTTGTT	0.000434711	0.000446266	0.000440488	0.0535447	-0.053823	2.41e-70	3.65e-72	2.41e-70	17.733	-17.9673	7670	7828	0.000199804	0.000261228	0.000230516	-0.146676	0.168337	6.71e-34	8.6e-44	6.71e-34	-12.1377	13.879	7817	7800	3.87e-05	5.95e-05	4.91e-05	-0.0438658	0.0545131	6.91e-08	2.25e-11	6.91e-08	-5.39356	6.68899	7927	7933
AACAAGCA	TGCTTGTT	0.000209254	0.000289239	0.000249246	-0.04369	0.0506186	8.93e-35	2.09e-47	8.93e-35	-12.3018	14.4637	5498	5660	0.00258811	0.00256508	0.00257659	-0.627533	0.616739	0	0	0	-43.7367	43.5412	5492	5633	0.000704002	0.000764389	0.000734195	-0.220232	0.225838	3.72e-117	4.87e-127	3.72e-117	-23.0138	23.9813	5684	5871
AACAAGGA	TCCTTGTT	5.89e-05	7.38e-05	6.64e-05	-0.023087	0.0259636	6.67e-11	2.75e-13	6.67e-11	-6.5279	7.30636	5580	5568	0.000829016	0.000886016	0.000857516	-0.354048	0.368787	5.54e-135	3.95e-144	5.54e-135	-24.7317	25.5685	5552	5509	0.000274788	0.000323458	0.000299123	-0.137326	0.149852	7.53e-47	7.84e-55	7.53e-47	-14.375	15.5965	5734	5709
AACAAGTC	GACTTGTT	1.33e-05	2.64e-05	1.99e-05	-0.0154281	0.0210244	0.00191311	1.25e-05	0.00191311	-3.10341	4.36854	2838	3028	0.000197337	0.00018357	0.000190453	-0.241094	0.226061	1.68e-33	2.78e-31	2.78e-31	-12.0625	11.6341	2868	3037	0.00028006	0.000178614	0.000229337	-0.193821	0.150737	1.03e-47	4.71e-31	4.71e-31	-14.5123	11.589	2951	3114
AACAATAA	TTATTGTT	0.000223872	0.000210699	0.000217286	-0.0363933	0.0343715	4.37e-37	5.27e-35	5.27e-35	-12.7244	12.3443	8262	8664	0.000446227	0.000488798	0.000467513	-0.203319	0.208825	1.56e-73	2.27e-80	1.56e-73	-18.1413	18.9873	8768	9050	0.000431886	0.000562481	0.000497183	-0.134185	0.149855	1.33e-72	5.46e-94	1.33e-72	-18.023	20.5696	9131	9471
AACAATAC	GTATTGTT	5.57e-05	3.63e-05	4.6e-05	-0.0282796	0.0226549	2.24e-10	3.04e-07	3.04e-07	-6.34388	5.12081	3504	3574	0.000259202	0.000228609	0.000243905	-0.244533	0.22852	1.82e-43	1.53e-38	1.53e-38	-13.8251	12.9834	3629	3684	0.000160943	0.000169445	0.000165194	-0.129158	0.132273	3.81e-28	1.52e-29	3.81e-28	-11.0007	11.2876	3781	3820
AACAATAG	CTATTGTT	6.39e-05	8.04e-05	7.21e-05	-0.0271655	0.0303501	1.07e-11	2.48e-14	1.07e-11	-6.7974	7.62316	4366	4392	0.0001913	0.000216375	0.000203838	-0.189672	0.201607	1.58e-32	1.43e-36	1.58e-32	-11.8766	12.6311	4474	4466	0.00013718	0.000214575	0.000175878	-0.107867	0.134594	3.13e-24	5.79e-37	3.13e-24	-10.1561	12.7024	4641	4656
AACAATAT	ATATTGTT	4.44e-05	3.26e-05	3.85e-05	-0.0183111	0.0156433	1.48e-08	1.21e-06	1.21e-06	-5.66412	4.85371	6610	6629	0.000340562	0.000383704	0.000362133	-0.202597	0.213562	1.49e-56	1.73e-63	1.49e-56	-15.8476	16.8218	6894	6962	0.00017273	0.00020025	0.00018649	-0.0960013	0.102579	4.38e-30	1.31e-34	4.38e-30	-11.3965	12.271	7280	7362
AACAATCC	GGATTGTT	0.000125813	0.000120393	0.000123103	-0.042981	0.0435041	1.45e-21	1.05e-20	1.05e-20	-9.53847	9.3307	3406	3229	0.000247915	0.000336676	0.000292296	-0.235386	0.296488	1.19e-41	6.29e-56	1.19e-41	-13.5207	15.7569	3430	3238	0.000161267	0.000239952	0.00020061	-0.128365	0.168753	3.37e-28	3.93e-41	3.37e-28	-11.0118	13.4327	3515	3335
AACAATCT	AGATTGTT	0.000141032	0.000104479	0.000122755	-0.0422067	0.0351404	5.6e-24	3.57e-18	3.57e-18	-10.099	8.69209	3996	4286	0.000205763	0.000228355	0.000217059	-0.207823	0.212036	7.35e-35	1.69e-38	7.35e-35	-12.3175	12.9762	4011	4285	0.000143165	0.000168996	0.00015608	-0.115924	0.122112	3.23e-25	1.8e-29	3.23e-25	-10.3753	11.2726	4199	4473
AACAATGA	TCATTGTT	0.000320355	0.000304046	0.0003122	-0.0448048	0.0437322	2.57e-52	9.62e-50	9.62e-50	-15.222	14.8294	7598	7588	0.000433508	0.000378922	0.000406215	-0.209588	0.197825	1.73e-71	1.02e-62	1.02e-62	-17.8807	16.7167	7816	7703	0.000180104	0.000217732	0.000198918	-0.0911511	0.101088	2.68e-31	1.75e-37	2.68e-31	-11.6372	12.7955	8056	7942
AACAATTA	TAATTGTT	4.33e-05	3.66e-05	3.99e-05	-0.0192388	0.0175866	2.2e-08	2.73e-07	2.73e-07	-5.59568	5.1413	5862	5900	0.000228019	0.000170723	0.000199371	-0.175142	0.15104	1.91e-38	3.29e-29	3.29e-29	-12.9667	11.2196	6212	6225	0.000157467	0.000198894	0.000178181	-0.0976573	0.108887	1.42e-27	2.18e-34	1.42e-27	-10.8812	12.2293	6462	6500
AACAATTC	GAATTGTT	9.02e-05	0.000146421	0.000118331	-0.0322978	0.0403252	6.59e-16	7.84e-25	6.59e-16	-8.07812	10.2901	4360	4579	0.000184425	0.000173224	0.000178825	-0.185401	0.177215	2.03e-31	1.3e-29	1.3e-29	-11.6612	11.3014	4495	4678	0.000153841	0.00017674	0.000165291	-0.113858	0.120345	5.63e-27	9.59e-31	5.63e-27	-10.7552	11.528	4661	4839
AACACAAA	TTTGTGTT	7.42e-05	6.92e-05	7.17e-05	-0.0189559	0.0182716	2.4e-13	1.53e-12	1.53e-12	-7.32476	7.0723	10225	10354	0.000929983	0.000984982	0.000957483	-0.271075	0.277418	3.48e-151	5.21e-160	3.48e-151	-26.1958	26.96	10505	10635	0.000825727	0.000722317	0.000774022	-0.171711	0.159992	4.46e-137	3.74e-120	3.74e-120	-24.9257	23.3115	10873	10984
AACACAAC	GTTGTGTT	0.00010314	9.7e-05	0.000100084	-0.0378152	0.0372639	5.82e-18	5.47e-17	5.47e-17	-8.63622	8.37638	3438	3456	0.000399513	0.000435769	0.000417641	-0.303002	0.324218	5e-66	7.48e-72	5e-66	-17.165	17.9273	3479	3397	0.000277659	0.000351713	0.000314686	-0.16992	0.195718	2.55e-47	1.83e-59	2.55e-47	-14.4499	16.2637	3598	3527
AACACAAT	ATTGTGTT	0.000241194	0.000207513	0.000224353	-0.0462679	0.0432226	8.02e-40	1.68e-34	1.68e-34	-13.2076	12.2506	5665	5640	0.000686046	0.000685925	0.000685985	-0.316792	0.318018	4.88e-112	5.11e-112	5.11e-112	-22.4967	22.4947	5732	5734	0.000613655	0.000719887	0.000666771	-0.200802	0.218387	2.29e-102	9.35e-120	2.29e-102	-21.4854	23.2722	5975	5976
AACACACA	TGTGTGTT	0.000259578	0.000261108	0.000260343	-0.0341581	0.0352204	1e-42	5.75e-43	1e-42	-13.7018	13.7421	9174	9610	0.00101896	0.00107075	0.00104485	-0.285543	0.296403	1.84e-165	8.99e-174	1.84e-165	-27.4215	28.1106	9311	9281	0.00097239	0.000963818	0.000968104	-0.188401	0.190527	4.46e-161	1.13e-159	1.13e-159	-27.0508	26.9312	9545	9538
AACACACT	AGTGTGTT	3.26e-05	3.88e-05	3.57e-05	-0.0171028	0.0201864	1.19e-06	1.19e-07	1.19e-06	-4.85774	5.29463	5323	4658	0.000343277	0.000317109	0.000330193	-0.259524	0.240786	5.46e-57	8.8e-53	8.8e-53	-15.9107	15.2921	4287	4506	0.000350795	0.000203086	0.000276941	-0.177473	0.130252	2.58e-59	4.47e-35	4.47e-35	-16.2425	12.3576	4390	4621
AACACAGA	TCTGTGTT	0.000106928	8.4e-05	9.55e-05	-0.0258673	0.0233215	1.45e-18	6.5e-15	6.5e-15	-8.79339	7.794	7780	7774	0.000529573	0.000539454	0.000534514	-0.234481	0.239884	6.43e-87	1.67e-88	6.43e-87	-19.7638	19.9474	7820	7833	0.000337679	0.000282712	0.000310196	-0.126602	0.117526	3.65e-57	3.78e-48	3.78e-48	-15.9358	14.5808	8018	7995
AACACAGG	NA	0.000121798	NA	0.000121798	-0.0328675	NA	6.31e-21	NA	6.31e-21	-9.385	NA	5667	NA	0.000166493	NA	0.000166493	-0.156101	NA	1.58e-28	NA	1.58e-28	-11.0797	NA	5730	NA	6.35e-05	NA	6.35e-05	-0.0656972	NA	4.91e-12	NA	4.91e-12	-6.90834	NA	5787	NA
AACACAGT	NA	3.59e-05	NA	3.59e-05	0.0163885	NA	3.44e-07	NA	3.44e-07	5.09777	NA	6751	NA	0.000150139	NA	0.000150139	-0.134781	NA	6.92e-26	NA	6.92e-26	-10.5214	NA	6950	NA	5.63e-05	NA	5.63e-05	-0.0559593	NA	7.78e-11	NA	7.78e-11	-6.50487	NA	7082	NA
AACACATA	TATGTGTT	0.000172279	0.000137758	0.000155019	-0.0392899	0.0347105	6.29e-29	1.85e-23	1.85e-23	-11.162	9.98104	5555	5695	0.000419804	0.000386723	0.000403264	-0.246134	0.23171	2.75e-69	5.68e-64	5.68e-64	-17.5957	16.8879	5751	5956	0.000402321	0.000365957	0.000384139	-0.161156	0.151109	9.29e-68	8.46e-62	8.46e-62	-17.3949	16.5899	5994	6209
AACACATC	GATGTGTT	5.32e-05	0.000128718	9.1e-05	-0.0271145	0.0395791	5.51e-10	5.03e-22	5.51e-10	-6.2038	9.64795	3592	4163	0.000407206	0.000303797	0.000355502	-0.306988	0.261698	2.9e-67	1.22e-50	1.22e-50	-17.3296	14.9675	3618	3732	0.000350992	0.000266733	0.000308862	-0.191967	0.166084	2.4e-59	1.58e-45	1.58e-45	-16.247	14.1627	3690	3806
AACACATG	CATGTGTT	0.00025735	0.000394992	0.000326171	-0.0460503	0.0566073	2.25e-42	4.39e-64	2.25e-42	-13.6429	16.9032	6132	6210	0.000660139	0.000793061	0.0007266	-0.299842	0.326969	7.03e-108	3.26e-129	7.03e-108	-22.0675	24.189	6186	6224	0.000386206	0.000363904	0.000375055	-0.155549	0.150085	4.06e-65	1.84e-61	1.84e-61	-17.0429	16.5433	6298	6346
AACACATT	AATGTGTT	0.000119647	9.31e-05	0.00010639	-0.0294986	0.0259889	1.38e-20	2.28e-16	2.28e-16	-9.30177	8.20652	6934	6939	0.000509144	0.000558228	0.000533686	-0.245438	0.25717	1.23e-83	1.61e-91	1.23e-83	-19.3786	20.2917	7088	7069	0.000495556	0.000511352	0.000503454	-0.162236	0.164811	4.96e-83	1.29e-85	4.96e-83	-19.3065	19.6119	7393	7383
AACACCAA	TTGGTGTT	0.000105967	0.000132311	0.000119139	-0.0321457	0.0360612	2.07e-18	1.35e-22	2.07e-18	-8.75378	9.78172	5114	5118	0.00280568	0.00241436	0.00261002	-0.676642	0.628276	0	0	0	-45.543	42.2394	5135	5120	0.000984947	0.00065286	0.000818904	-0.269605	0.22023	3.94e-163	8.74e-109	8.74e-109	-27.2251	22.1616	5285	5274
AACACCAC	GTGGTGTT	8.02e-05	0.000118728	9.94e-05	-0.0318056	0.0388038	2.67e-14	1.94e-20	2.67e-14	-7.6135	9.26596	3925	3914	0.00123467	0.00121403	0.00122435	-0.508799	0.501434	4.5e-200	9.23e-197	9.23e-197	-30.1881	29.9344	3966	3927	0.000535107	0.000429062	0.000482085	-0.226136	0.202409	1.66e-89	3.86e-72	3.86e-72	-20.0625	17.964	4048	3993
AACACCCA	TGGGTGTT	1.35e-06	6.46e-09	6.79e-07	-0.00426915	0.000296175	0.322725	0.945523	0.945523	-0.988874	0.0683298	3647	3674	0.000245414	0.000329133	0.000287274	-0.232549	0.265941	3.02e-41	1.03e-54	3.02e-41	-13.4523	15.5794	3724	3673	8.36e-05	0.000126224	0.00010492	-0.0919564	0.111985	2.21e-15	2e-22	2.21e-15	-7.92885	9.74199	3780	3725
AACACCCC	GGGGTGTT	7.97e-06	1.2e-05	1e-05	-0.0126835	0.01532	0.0163894	0.00319117	0.0163894	-2.40013	2.94871	2507	2601	0.00186636	0.00184841	0.00185739	-0.794911	0.783377	1.93e-301	1.46e-298	1.46e-298	-37.1275	36.9482	2490	2546	0.000750655	0.000921013	0.000835834	-0.341592	0.373204	8.61e-125	1.14e-152	8.61e-125	-23.7647	26.3258	2541	2619
AACACCCT	AGGGTGTT	5.5e-06	1.64e-05	1.1e-05	-0.00975898	0.0166866	0.0460984	0.000572959	0.0460984	-1.99449	3.44412	2925	2958	0.000235069	0.00023055	0.000232809	-0.259157	0.255129	1.4e-39	7.47e-39	7.47e-39	-13.1656	13.0384	2952	2991	0.000112813	0.000135766	0.000124289	-0.1222	0.132877	3.27e-20	5.35e-24	3.27e-20	-9.20987	10.1035	2985	3031
AACACCTC	GAGGTGTT	1.43e-05	2.31e-05	1.87e-05	-0.0147121	0.0187221	0.00132016	4.35e-05	0.00132016	-3.21157	4.08823	3341	3324	0.00122438	0.00125353	0.00123896	-0.556582	0.563405	2.01e-198	4.23e-203	2.01e-198	-30.062	30.4181	3340	3315	0.000513903	0.000519046	0.000516474	-0.244802	0.245983	4.91e-86	7.06e-87	4.91e-86	-19.6608	19.759	3395	3374
AACACGGT	ACCGTGTT	0.00116103	0.00129426	0.00122764	0.139833	-0.145352	1.09e-184	1.18e-205	1.09e-184	28.9909	-30.6111	3023	3132	1.86e-07	3e-06	1.59e-06	-0.00704306	-0.0277919	0.711126	0.136772	0.711126	-0.370345	-1.48792	3182	3312	0.0002185	0.000257279	0.00023789	0.165417	-0.176366	1.31e-37	5.63e-44	1.31e-37	12.8181	-13.9094	3173	3300
AACACTCC	GGAGTGTT	5.27e-06	2.57e-05	1.55e-05	-0.00949887	0.0215017	0.0509631	1.6e-05	0.0509631	-1.95179	4.31463	2934	2821	0.000519852	0.000582268	0.00055106	-0.406537	0.42318	2.34e-85	2.23e-95	2.34e-85	-19.5815	20.7243	2616	2742	0.000356312	0.000314747	0.000335529	-0.226911	0.210603	3.22e-60	2.1e-53	2.1e-53	-16.3697	15.385	2674	2804
AACAGAAA	TTTCTGTT	0.000434238	0.000445847	0.000440043	-0.0372669	0.0369513	2.87e-70	4.25e-72	2.87e-70	-17.7234	17.9588	15207	16057	0.00178328	0.00212995	0.00195661	-0.306613	0.330207	4.16e-288	0	4.16e-288	-36.2902	39.668	15407	15983	0.00127353	0.00131087	0.0012922	-0.17433	0.173807	2.37e-210	1.84e-216	2.37e-210	-30.9621	31.4133	15928	16516
AACAGAAC	GTTCTGTT	0.000133634	0.000147041	0.000140337	-0.0325719	0.0340858	8.35e-23	6.25e-25	8.35e-23	-9.83048	10.3119	6191	6211	0.00417089	0.00343316	0.00380202	-0.741972	0.675273	0	0	0	-55.5666	50.3949	6208	6159	0.00108504	0.000870342	0.000977692	-0.25535	0.228557	1.65e-179	2.23e-144	2.23e-144	-28.5765	25.5908	6390	6384
AACAGAAG	CTTCTGTT	0.00011034	3.17e-05	7.1e-05	-0.0262786	0.0144397	4.17e-19	1.68e-06	1.68e-06	-8.93263	4.78803	8037	7596	0.000174644	0.000140883	0.000157764	-0.141839	0.12513	7.66e-30	2.16e-24	2.16e-24	-11.3477	10.1918	7249	7465	3.21e-05	5.99e-05	4.6e-05	-0.041114	0.0553335	9e-07	1.9e-11	9e-07	-4.91239	6.71347	7430	7614
AACAGAAT	ATTCTGTT	0.00017304	0.000231918	0.000202479	-0.0314196	0.0363198	4.77e-29	2.34e-38	4.77e-29	-11.1866	12.951	8819	8814	0.00192733	0.00193144	0.00192939	-0.428326	0.427944	3.16128308827622e-311	6.89977595280832e-312	3.16128308827622e-311	-37.7302	37.7706	8819	8798	0.00112619	0.00104749	0.00108684	-0.21908	0.211109	3.04e-186	2.3e-173	2.3e-173	-29.1139	28.077	9228	9178
AACAGACA	TGTCTGTT	0.000463675	0.000524302	0.000493989	-0.051346	0.0543803	6.59e-75	1.86e-84	6.59e-75	-18.3145	19.4757	8244	8363	0.00451792	0.00457786	0.00454789	-0.657143	0.659119	0	0	0	-57.8422	58.2264	8188	8285	0.00154564	0.00141531	0.00148047	-0.25927	0.24741	7.06e-255	1.5e-233	1.5e-233	-34.1145	32.6424	8424	8526
AACAGACC	GGTCTGTT	1.98e-05	6.27e-05	4.12e-05	-0.0177607	0.0317873	0.000156831	1.65e-11	0.000156831	-3.78002	6.73397	3152	3114	0.000742439	0.000749807	0.000746123	-0.446708	0.451833	4.34e-121	2.85e-122	4.34e-121	-23.4037	23.5196	3114	3077	0.000282059	0.000272967	0.000277513	-0.187587	0.18555	4.83e-48	1.5e-46	1.5e-46	-14.564	14.3273	3152	3120
AACAGACT	AGTCTGTT	4e-05	8.27e-05	6.14e-05	-0.0201265	0.0280399	7.43e-08	1.05e-14	7.43e-08	-5.38059	7.73279	5015	5338	0.00105847	0.00102302	0.00104075	-0.422595	0.409412	8.4e-172	4.11e-166	4.11e-166	-27.9487	27.4762	4999	5152	0.000163767	0.000219404	0.000191586	-0.112328	0.128147	1.31e-28	9.31e-38	1.31e-28	-11.0968	12.8446	5130	5279
AACAGAGA	TCTCTGTT	0.000106856	0.000129224	0.00011804	-0.0241857	0.0262826	1.49e-18	4.18e-22	1.49e-18	-8.79045	9.6669	9092	9302	0.00200351	0.00208432	0.00204391	-0.426576	0.431071	1.97626258336499e-323	0	1.97626258336499e-323	-38.4701	39.2399	9130	9302	0.000493092	0.000436286	0.000464689	-0.142896	0.133311	1.26e-82	2.53e-73	2.53e-73	-19.2584	18.1146	9369	9537
AACAGAGC	GCTCTGTT	0.000449185	0.000358273	0.000403729	0.0526577	-0.0471082	1.26e-72	2.7e-58	2.7e-58	18.026	-16.098	8245	8206	0.00117559	0.00103628	0.00110593	-0.34531	0.324372	1.36e-190	3.06e-168	3.06e-168	-29.4561	27.6539	8362	8340	6.27e-05	8.92e-05	7.59e-05	-0.0541137	0.0646948	6.66e-12	2.66e-16	6.66e-12	-6.86492	8.18815	8500	8449
AACAGAGT	ACTCTGTT	0.000121461	4.09e-07	6.09e-05	0.0287795	0.001485	7.14e-21	0.58661	0.58661	9.37201	0.543755	7447	9394	0.000119602	0.000117439	0.000118521	-0.114671	0.112164	5.99e-21	1.34e-20	1.34e-20	-9.39047	9.30518	7674	7835	5.99e-05	2.22e-05	4.1e-05	-0.0551605	0.0331578	1.95e-11	4.4e-05	4.4e-05	-6.7101	4.08545	7780	7941
AACAGATA	TATCTGTT	0.000108246	0.000124311	0.000116278	-0.0319551	0.033828	8.97e-19	2.52e-21	8.97e-19	-8.84744	9.48133	5365	5492	0.000484454	0.000573005	0.00052873	-0.272717	0.292234	1.13e-79	6.83e-94	1.13e-79	-18.9027	20.5587	5491	5644	0.000198208	0.000279083	0.000238646	-0.116931	0.137146	2.83e-34	1.49e-47	2.83e-34	-12.2082	14.4869	5717	5851
AACAGCAA	TTGCTGTT	6.72e-05	9.24e-05	7.98e-05	-0.0218344	0.0254171	3.18e-12	3.02e-16	3.18e-12	-6.96978	8.17284	6980	6916	0.000319114	0.000415516	0.000367315	-0.193382	0.220843	4.19e-53	1.34e-68	4.19e-53	-15.3403	17.5056	7041	6949	0.000124694	0.00023377	0.000179232	-0.0818399	0.112015	3.58e-22	4.07e-40	3.58e-22	-9.68277	13.2585	7194	7097
AACAGCAC	GTGCTGTT	7.08e-06	2.87e-05	1.79e-05	-0.0092559	0.0195525	0.0236247	5.31e-06	0.0236247	-2.26318	4.5521	3891	3805	0.000327547	0.000272378	0.000299963	-0.220292	0.246446	1.85e-54	1.38e-45	1.38e-45	-15.5418	14.1722	4101	3791	0.00015053	0.00016539	0.00015796	-0.101741	0.130233	1.97e-26	7.06e-29	1.97e-26	-10.6388	11.1517	4151	3862
AACAGCAG	CTGCTGTT	6.35e-05	6.39e-05	6.37e-05	-0.022907	0.022551	1.23e-11	1.05e-11	1.23e-11	-6.77691	6.79953	6067	6276	0.000316034	0.000314333	0.000315184	-0.207194	0.203041	1.31e-52	2.46e-52	2.46e-52	-15.2661	15.225	6154	6344	0.000148615	0.000169533	0.000159074	-0.0964123	0.101634	4.08e-26	1.47e-29	4.08e-26	-10.5709	11.2905	6251	6420
AACAGCAT	ATGCTGTT	0.000330619	0.000414805	0.000372712	-0.0505791	0.0562156	6.19e-54	3.31e-67	6.19e-54	-15.4641	17.3221	6577	6664	0.00365645	0.00326823	0.00346234	-0.686511	0.650053	0	0	0	-52.0137	49.1654	6569	6536	0.000640779	0.0007464	0.000693589	-0.193686	0.208676	8.3e-107	4.28e-124	8.3e-107	-21.9555	23.6972	6778	6787
AACAGCCA	TGGCTGTT	2.66e-05	1.62e-05	2.14e-05	-0.0167693	0.0130655	1.18e-05	0.000613268	0.000613268	-4.3817	3.42569	4757	4808	0.000307432	0.000291036	0.000299234	-0.231961	0.224491	3.17e-51	1.37e-48	1.37e-48	-15.0568	14.6497	4792	4868	9.12e-05	8.74e-05	8.93e-05	-0.0858809	0.0836934	1.22e-16	5.21e-16	5.21e-16	-8.28162	8.10674	4857	4931
AACAGGAA	NA	0.000128892	NA	0.000128892	-0.0294913	NA	4.72e-22	NA	4.72e-22	-9.65447	NA	7403	NA	0.000121188	NA	0.000121188	-0.116757	NA	3.32e-21	NA	3.32e-21	-9.45255	NA	7401	NA	6.37e-05	NA	6.37e-05	-0.0572967	NA	4.45e-12	NA	4.45e-12	-6.92207	NA	7576	NA
AACAGGCA	TGCCTGTT	0.000171406	0.000138544	0.000154975	-0.0388659	0.0342333	8.65e-29	1.39e-23	1.39e-23	-11.1336	10.0095	5668	5957	0.0017902	0.0015411	0.00166565	-0.511232	0.46322	3.22e-289	3.04e-249	3.04e-249	-36.3607	33.7321	5696	6026	0.000450806	0.000304562	0.000377684	-0.174118	0.140005	1.06e-75	9.84e-52	9.84e-52	-18.4137	15.134	5795	6108
AACAGTCT	NA	9.81e-06	NA	9.81e-06	-0.0112169	NA	0.00772256	NA	0.00772256	-2.66397	NA	3936	NA	0.000137691	NA	0.000137691	-0.176115	NA	7.1e-24	NA	7.1e-24	-10.0757	NA	3746	NA	0.000108202	NA	0.000108202	-0.10531	NA	1.89e-19	NA	1.89e-19	-9.01965	NA	3858	NA
AACATAAA	TTTATGTT	0.000103276	0.000168043	0.00013566	-0.0233624	0.0293106	5.54e-18	2.95e-28	5.54e-18	-8.64191	11.0239	9279	9527	0.000519293	0.000488659	0.000503976	-0.207062	0.198458	2.88e-85	2.39e-80	2.39e-80	-19.5709	18.9846	9878	10041	0.000426425	0.000417183	0.000421804	-0.125757	0.122746	1.04e-71	3.41e-70	3.41e-70	-17.9087	17.7135	10307	10498
AACATAAT	ATTATGTT	5.11e-05	4.44e-05	4.78e-05	-0.0197848	0.0184421	1.21e-09	1.46e-08	1.46e-08	-6.07938	5.6668	6519	6522	0.000174271	0.000217562	0.000195916	-0.144565	0.161266	8.8e-30	9.24e-37	8.8e-30	-11.3355	12.6658	6924	6937	0.00025926	0.000222466	0.000240863	-0.118028	0.109028	2.66e-44	2.93e-38	2.93e-38	-13.9628	12.9339	7236	7271
AACATACA	TGTATGTT	9.63e-05	6.72e-05	8.17e-05	-0.0276873	0.0225329	7.1e-17	3.21e-12	3.21e-12	-8.34554	6.96834	6305	6566	0.000535618	0.000567561	0.00055159	-0.262462	0.263246	6.88e-88	5.11e-93	6.88e-88	-19.8763	20.4608	6517	6720	0.000493786	0.000503258	0.000498522	-0.1688	0.166493	9.67e-83	2.72e-84	9.67e-83	-19.272	19.456	6800	6997
AACATACC	GGTATGTT	0.000193211	0.000186786	0.000189999	-0.0577063	0.057545	3.07e-32	3.19e-31	3.19e-31	-11.8208	11.6225	2924	2855	0.00129025	0.00145194	0.00137109	-0.621845	0.664789	5.43e-209	6.17e-235	5.43e-209	-30.861	32.7403	2812	2760	0.000949857	0.00109762	0.00102374	-0.357005	0.386294	2.17e-157	1.44e-181	2.17e-157	-26.7353	28.7417	2941	2897
AACATAGA	TCTATGTT	3.59e-05	3.22e-05	3.4e-05	-0.0194615	0.0182772	3.45e-07	1.42e-06	1.42e-06	-5.09719	4.82211	4770	4810	0.000143128	0.000185127	0.000164127	-0.156485	0.177089	9.39e-25	1.56e-31	9.39e-25	-10.2727	11.6834	4898	4925	0.000140629	0.000155286	0.000147957	-0.103657	0.108785	8.44e-25	3.25e-27	8.44e-25	-10.2829	10.8056	5086	5125
AACATATC	GATATGTT	7.33e-05	0.000105741	8.95e-05	-0.0336492	0.0399826	3.36e-13	2.25e-18	3.36e-13	-7.27941	8.74446	3277	3281	0.000213956	0.00015567	0.000184813	-0.230332	0.193679	3.52e-36	8.84e-27	8.84e-27	-12.5603	10.7134	3397	3434	0.000183769	0.00018483	0.000184299	-0.143025	0.141465	6.69e-32	4.48e-32	6.69e-32	-11.7551	11.789	3544	3582
AACATCAA	TTGATGTT	6.69e-05	3.49e-05	5.09e-05	-0.0251999	0.0182755	3.53e-12	4.98e-07	4.98e-07	-6.9549	5.02701	5099	5087	0.000516357	0.000521599	0.000518978	-0.283547	0.286649	8.52e-85	1.23e-85	8.52e-85	-19.5155	19.6143	5189	5151	0.000317452	0.000304983	0.000311217	-0.149153	0.147209	7.57e-54	8.39e-52	8.39e-52	-15.451	15.1444	5405	5355
AACATCAC	GTGATGTT	0.000369908	0.000353019	0.000361463	-0.0562605	0.0527321	3.95e-60	1.82e-57	1.82e-57	-16.3574	15.9795	5914	6363	0.00171533	0.00166356	0.00168944	-0.498438	0.492811	3.34e-277	6.79e-269	6.79e-269	-35.5909	35.0488	5796	5681	0.00109037	0.000959389	0.00102488	-0.268101	0.252331	2.22e-180	5.99e-159	5.99e-159	-28.6465	26.8692	5963	5857
AACATCAT	ATGATGTT	8.17e-05	0.000101091	9.14e-05	-0.0270036	0.0295836	1.54e-14	1.23e-17	1.54e-14	-7.68398	8.54999	5635	5793	0.000978207	0.000852285	0.000915246	-0.379625	0.349955	6.36e-159	1.02e-138	1.02e-138	-26.8671	25.0767	5675	5801	0.000411139	0.000464856	0.000437997	-0.165016	0.173377	3.34e-69	5.29e-78	3.34e-69	-17.5846	18.6986	5911	6046
AACATCCA	TGGATGTT	5.24e-05	4.23e-05	4.74e-05	-0.0258449	0.0232505	7.44e-10	3.17e-08	3.17e-08	-6.15649	5.53161	3953	3945	0.000197866	0.000251308	0.000224587	-0.203102	0.229587	1.38e-33	3.4e-42	1.38e-33	-12.0787	13.6129	4029	4003	0.000178148	0.000136972	0.00015756	-0.130598	0.114788	5.63e-31	3.38e-24	3.38e-24	-11.5739	10.1483	4111	4098
AACATCCC	GGGATGTT	1.03e-05	7.83e-06	9.06e-06	-0.0130195	0.0110799	0.00637081	0.0173401	0.0173401	-2.72807	2.37942	3062	3014	0.0001892	0.000213569	0.000201385	-0.228352	0.23619	3.44e-32	4.06e-36	3.44e-32	-11.8112	12.549	3050	3019	0.000136978	0.000149494	0.000143236	-0.131814	0.134302	3.37e-24	2.92e-26	3.37e-24	-10.1486	10.6022	3102	3065
AACATGCC	GGCATGTT	4.85e-06	2.87e-05	1.68e-05	-0.00881103	0.0219075	0.0610075	5.32e-06	0.0610075	-1.87344	4.55199	3176	3043	0.00030618	0.000300111	0.000303146	-0.290217	0.288768	5.04e-51	4.77e-50	4.77e-50	-15.0261	14.8764	3077	3055	0.000107236	0.000113161	0.000110199	-0.115902	0.119566	2.73e-19	2.87e-20	2.73e-19	-8.9793	9.22408	3163	3145
AACATGGA	TCCATGTT	8.25e-05	0.000131546	0.000107018	0.0231163	-0.0290863	1.13e-14	1.79e-22	1.13e-14	7.72335	-9.75338	7790	7887	0.00037715	0.000360856	0.000369003	-0.200267	0.194907	1.96e-62	8.15e-60	8.15e-60	-16.6775	16.3131	7903	7991	2.54e-06	2.06e-07	1.38e-06	-0.0111611	0.00316101	0.166615	0.693764	0.693764	-1.38316	0.393752	8042	8136
AACATGGC	GCCATGTT	0.000268008	0.000294413	0.000281211	0.0425528	-0.0446696	4.68e-44	3.18e-48	4.68e-44	13.9226	-14.5925	7512	7496	5.85e-05	5.09e-05	5.47e-05	-0.0797637	0.0745812	5.19e-11	8.95e-10	8.95e-10	-6.56538	6.12719	7780	7760	1.03e-05	4.34e-06	7.34e-06	-0.0228681	0.0148567	0.00529017	0.070947	0.070947	-2.78882	1.80582	7842	7799
AACATGGT	ACCATGTT	0.00408141	0.00409609	0.00408875	0.113931	-0.11437	0	0	0	54.4354	-54.5336	16001	16012	2.16e-05	1.28e-05	1.72e-05	-0.0332046	0.0255837	6.56e-05	0.00213635	0.00213635	-3.99183	3.0706	16634	16666	0.000350207	0.000349151	0.000349679	0.0912431	-0.091202	3.23e-59	4.81e-59	4.81e-59	16.2288	-16.2044	16712	16764
AACATTCA	TGAATGTT	4.81e-05	5.39e-05	5.1e-05	-0.0194187	0.0202481	3.74e-09	4.34e-10	3.74e-09	-5.89532	6.24127	6428	6587	0.000334194	0.000467977	0.000401086	-0.206449	0.240651	1.58e-55	5.01e-77	1.58e-55	-15.6987	18.5783	6587	6749	0.000167114	0.000232723	0.000199919	-0.0984532	0.114449	3.68e-29	6.05e-40	3.68e-29	-11.2096	13.2288	6783	6945
AACATTCC	GGAATGTT	0.000199536	0.000159188	0.000179362	-0.040842	0.0396288	3.07e-33	7.44e-27	7.44e-27	-12.0127	10.7294	5781	5067	0.00201499	0.00181931	0.00191715	-0.600427	0.55868	0	6.85e-294	6.85e-294	-38.5804	36.6557	4712	4869	0.000491724	0.000480647	0.000486186	-0.199959	0.193765	2.1e-82	1.37e-80	1.37e-80	-19.2317	19.0137	4853	5013
AACATTCT	AGAATGTT	3.64e-05	3.69e-05	3.67e-05	-0.016061	0.0162131	2.9e-07	2.37e-07	2.9e-07	-5.12986	5.16752	7078	7043	0.000564677	0.000642127	0.000603402	-0.265256	0.276522	1.49e-92	5.47e-105	1.49e-92	-20.4087	21.7642	6691	7042	0.000270457	0.000340697	0.000305577	-0.123473	0.135334	3.87e-46	1.17e-57	3.87e-46	-14.2612	16.0069	6930	7287
AACCAAAA	TTTTGGTT	0.0004827	0.000472342	0.000477521	-0.0437849	0.0436529	6.63e-78	2.84e-76	2.84e-76	-18.6866	18.485	10953	10903	0.0112326	0.0102796	0.0107561	-0.868707	0.836249	0	0	0	-91.5134	87.5031	10990	10921	0.00295755	0.00255995	0.00275875	-0.296918	0.277837	0	0	0	-47.2235	43.9259	11498	11423
AACCAAAC	GTTTGGTT	0.000240297	0.00025229	0.000246293	-0.0451495	0.0431588	1.11e-39	1.42e-41	1.11e-39	-13.183	13.508	5435	5492	0.000727845	0.000697312	0.000712578	-0.319158	0.291116	9.55e-119	7.59e-114	7.59e-114	-23.1723	22.6807	5498	5561	0.000307666	0.000376223	0.000341945	-0.140501	0.14488	3.05e-52	1.76e-63	3.05e-52	-15.2109	16.8211	5623	5697
AACCAAAG	CTTTGGTT	0.0001249	7.51e-05	0.00010002	-0.0344305	0.026361	2.03e-21	1.69e-13	1.69e-13	-9.50379	7.37125	5286	5465	0.000885536	0.000781413	0.000833475	-0.371251	0.345836	4.72e-144	2.41e-127	2.41e-127	-25.5616	24.0106	5377	5505	0.000319732	0.00030711	0.000313421	-0.150483	0.146504	3.2e-54	3.76e-52	3.76e-52	-15.5064	15.1972	5533	5647
AACCAAAT	ATTTGGTT	0.000220595	0.000212022	0.000216309	-0.0419415	0.0411811	1.44e-36	3.26e-35	3.26e-35	-12.6309	12.383	6318	6284	0.000672485	0.000612385	0.000642435	-0.294575	0.282535	7.33e-110	3.26e-100	3.26e-100	-22.2731	21.2539	6505	6423	0.000409402	0.000427077	0.00041824	-0.154976	0.158825	6.43e-69	8.17e-72	6.43e-69	-17.5474	17.9223	6698	6643
AACCAACA	TGTTGGTT	5.88e-05	6.63e-05	6.25e-05	-0.024629	0.0263108	7.01e-11	4.39e-12	7.01e-11	-6.52057	6.92404	4880	4824	0.00163167	0.00201349	0.00182258	-0.531419	0.594663	8.89e-264	0	8.89e-264	-34.7107	38.566	4828	4784	0.000514064	0.000617246	0.000565655	-0.20166	0.221696	4.62e-86	5.91e-103	4.62e-86	-19.6639	21.5483	4951	4940
AACCAAGA	TCTTGGTT	3.13e-05	2.91e-05	3.02e-05	-0.0167152	0.0162528	1.94e-06	4.49e-06	4.49e-06	-4.75915	4.58721	5473	5514	0.000773138	0.000577267	0.000675202	-0.338903	0.295718	5.14e-126	1.41e-94	1.41e-94	-23.883	20.6351	5506	5514	0.00018595	0.00024135	0.00021365	-0.11236	0.129368	2.93e-32	2.32e-41	2.93e-32	-11.8246	13.4718	5641	5643
AACCAAGG	CCTTGGTT	2.81e-05	2.92e-05	2.86e-05	-0.0185609	0.0191079	6.6e-06	4.34e-06	6.6e-06	-4.50611	4.5946	4125	4048	0.00017695	0.000212653	0.000194801	-0.190391	0.210404	3.25e-30	5.71e-36	3.25e-30	-11.4224	12.522	4114	4053	3.72e-05	1.7e-05	2.71e-05	-0.0594162	0.0404847	1.21e-07	0.000348398	0.000348398	-5.292	3.57639	4166	4103
AACCAAGT	NA	9.95e-06	NA	9.95e-06	-0.0116672	NA	0.00729961	NA	0.00729961	-2.68287	NA	3537	NA	0.000283458	NA	0.000283458	-0.256537	NA	2.28e-47	NA	2.28e-47	-14.4577	NA	3571	NA	4.97e-05	NA	4.97e-05	-0.0727604	NA	9.96e-10	NA	9.96e-10	-6.11018	NA	3645	NA
AACCAATA	TATTGGTT	6.5e-05	4.66e-05	5.58e-05	-0.0304181	0.0251131	7.04e-12	6.55e-09	6.55e-09	-6.857	5.80207	3516	3732	0.000363463	0.000274871	0.000319167	-0.288094	0.245255	3.11e-60	5.48e-46	5.48e-46	-16.372	14.2369	3646	3847	9.77e-05	0.000126876	0.000112276	-0.100191	0.111822	1.04e-17	1.56e-22	1.04e-17	-8.56962	9.76713	3785	4004
AACCAATG	CATTGGTT	7.01e-05	8.12e-05	7.57e-05	-0.0310983	0.033987	1.09e-12	1.79e-14	1.09e-12	-7.11875	7.66503	3639	3482	0.000942656	0.00074563	0.000844143	-0.466515	0.422869	3.22e-153	1.34e-121	1.34e-121	-26.3739	23.4539	3619	3439	0.000474717	0.000338703	0.00040671	-0.223266	0.191681	1.28e-79	2.48e-57	2.48e-57	-18.896	15.96	3738	3563
AACCACAA	TTGTGGTT	0.000166454	0.000221557	0.000194006	-0.0359099	0.041533	5.26e-28	1.01e-36	5.26e-28	-10.9716	12.6584	6497	6489	0.00188697	0.00179448	0.00184073	-0.492957	0.48381	9.47e-305	6.62e-290	6.62e-290	-37.3324	36.4042	6509	6455	0.000859568	0.000644495	0.000752031	-0.224021	0.195341	1.29e-142	2.05e-107	2.05e-107	-25.4317	22.0191	6722	6654
AACCACAC	GTGTGGTT	4.79e-05	6.93e-05	5.86e-05	-0.0261613	0.0312892	3.98e-09	1.46e-12	3.98e-09	-5.88523	7.07879	3492	3528	0.000649005	0.000789733	0.000719369	-0.394249	0.430243	4.31e-106	1.12e-128	4.31e-106	-21.8805	24.1382	3466	3545	0.000395666	0.000451475	0.000423571	-0.208418	0.220004	1.14e-66	8.23e-76	1.14e-66	-17.2504	18.4274	3544	3630
AACCACAG	CTGTGGTT	6.28e-05	3.92e-05	5.1e-05	-0.023798	0.0189127	1.61e-11	1.02e-07	1.02e-07	-6.73797	5.32289	5565	5507	0.000359938	0.000285587	0.000322762	-0.229281	0.206878	1.15e-59	1.03e-47	1.03e-47	-16.2924	14.5119	5720	5589	0.000125711	0.000113277	0.000119494	-0.0919649	0.0885535	2.43e-22	2.74e-20	2.74e-20	-9.72217	9.22879	5822	5666
AACCACAT	ATGTGGTT	0.000139332	0.000115631	0.000127482	-0.0388189	0.0351366	1.04e-23	6.02e-20	6.02e-20	-10.0379	9.14428	4689	4756	0.000769561	0.00088473	0.000827146	-0.369304	0.392836	1.93e-125	6.35e-144	1.93e-125	-23.8276	25.5499	4767	4844	0.000669789	0.000692298	0.000681043	-0.232954	0.235374	1.48e-111	3.06e-115	1.48e-111	-22.4473	22.8216	4886	4941
AACCACCA	TGGTGGTT	0.000136141	0.000114997	0.000125569	-0.0357338	0.0322311	3.34e-23	7.59e-20	7.59e-20	-9.92228	9.11918	5339	5301	0.000359788	0.000415638	0.000387713	-0.234073	0.236478	1.21e-59	1.28e-68	1.21e-59	-16.289	17.5081	5478	5461	0.000129376	0.00013317	0.000131273	-0.0954969	0.0912231	6.05e-23	1.43e-23	6.05e-23	-9.86288	10.0065	5545	5512
AACCACTC	GAGTGGTT	4.8e-06	2.81e-06	3.8e-06	-0.00951364	0.0073043	0.0625847	0.153942	0.153942	-1.86213	1.42575	2688	2676	0.000153882	0.000164806	0.000159344	-0.21905	0.227022	1.72e-26	2.96e-28	1.72e-26	-10.6517	11.0234	2710	2699	8.49e-05	0.000129666	0.000107265	-0.11035	0.136992	1.38e-15	5.42e-23	1.38e-15	-7.98779	9.87395	2759	2732
AACCACTG	CAGTGGTT	0.000104321	0.000139722	0.000122021	-0.0298722	0.0340406	3.78e-18	9.04e-24	3.78e-18	-8.68552	10.0519	5907	6122	0.000728202	0.00091952	0.000823861	-0.322164	0.354726	8.37e-119	1.66e-149	8.37e-119	-23.178	26.0479	5925	6180	0.000157895	0.000166467	0.000162181	-0.101727	0.102586	1.21e-27	4.7e-29	1.21e-27	-10.896	11.1879	6016	6261
AACCAGAA	TTCTGGTT	8.66e-05	7.16e-05	7.91e-05	-0.0260215	0.0238823	2.51e-15	6.32e-13	6.32e-13	-7.91353	7.1935	6396	6305	0.000702529	0.00069342	0.000697974	-0.301744	0.3022	1.1e-114	3.2e-113	3.2e-113	-22.7655	22.6173	6426	6356	0.00019887	0.000250225	0.000224547	-0.108518	0.122585	2.2e-34	8.09e-43	2.2e-34	-12.2286	13.7173	6579	6531
AACCAGAC	GTCTGGTT	3e-05	1.23e-05	2.12e-05	-0.0237768	0.0145731	3.16e-06	0.00289532	0.00289532	-4.65999	2.97865	2684	2845	0.000222447	0.000212462	0.000217454	-0.26208	0.247685	1.51e-37	6.12e-36	6.12e-36	-12.8072	12.5164	2726	2843	5.87e-05	0.000109156	8.39e-05	-0.0914136	0.120452	3.05e-11	1.32e-19	3.05e-11	-6.64425	9.05935	2768	2895
AACCAGCA	TGCTGGTT	2.49e-05	1.95e-05	2.22e-05	-0.0180287	0.015608	2.19e-05	0.000175957	0.000175957	-4.24437	3.75127	3869	4017	0.000301783	0.000268645	0.000285214	-0.254624	0.235911	2.57e-50	5.5e-45	5.5e-45	-14.9178	14.0747	3914	4043	5.54e-05	6.41e-05	5.98e-05	-0.0743438	0.0783803	1.09e-10	3.83e-12	1.09e-10	-6.45434	6.94343	3949	4096
AACCAGCC	GGCTGGTT	0.000133031	0.000117005	0.000125018	0.0395126	-0.0371623	1.04e-22	3.64e-20	3.64e-20	9.80828	-9.19847	4316	4303	3.34e-05	1.73e-05	2.53e-05	0.0801097	-0.0577477	6.91e-07	0.000361048	0.000361048	4.96394	-3.56705	4395	4376	8.23e-05	0.00010436	9.33e-05	0.0859323	-0.0969526	3.64e-15	8.16e-19	3.64e-15	7.86696	-8.85806	4403	4397
AACCAGGA	NA	2.18e-05	NA	2.18e-05	-0.0142251	NA	7.17e-05	NA	7.17e-05	-3.97067	NA	5416	NA	0.000763674	NA	0.000763674	-0.343002	NA	1.7e-124	NA	1.7e-124	-23.7363	NA	5440	NA	0.000133452	NA	0.000133452	-0.0975889	NA	1.29e-23	NA	1.29e-23	-10.0171	NA	5502	NA
AACCATAA	TTATGGTT	0.000227885	0.000179216	0.00020355	-0.0493283	0.0439153	1.01e-37	5.02e-30	5.02e-30	-12.8379	11.3845	4685	4706	0.00236321	0.00240598	0.00238459	-0.644151	0.653258	0	0	0	-41.7885	42.1659	4750	4756	0.00072689	0.000778781	0.000752835	-0.239724	0.249174	6.68e-121	2.15e-129	6.68e-121	-23.3852	24.2062	4941	4957
AACCATAC	GTATGGTT	3.51e-05	4.45e-05	3.98e-05	-0.0305765	0.0335598	4.67e-07	1.42e-08	4.67e-07	-5.0396	5.67154	1911	2010	0.000284807	0.000222654	0.00025373	-0.35117	0.302848	1.38e-47	1.4e-37	1.4e-37	-14.492	12.8132	1957	2058	0.000162508	0.000137111	0.00014981	-0.178323	0.160536	2.11e-28	3.21e-24	3.21e-24	-11.0541	10.1535	2029	2110
AACCATAT	ATATGGTT	0.000192947	0.000238935	0.000215941	-0.0461849	0.0528104	3.38e-32	1.82e-39	3.38e-32	-11.8127	13.1456	4561	4344	0.000597123	0.000646196	0.000621659	-0.328633	0.35099	9.18e-98	1.22e-105	9.18e-98	-20.9872	21.8331	4654	4428	0.00044606	0.000440107	0.000443084	-0.191765	0.196012	6.34e-75	5.99e-74	5.99e-74	-18.3165	18.1938	4773	4522
AACCATCA	TGATGGTT	0.000254098	0.000211239	0.000232668	-0.0477988	0.0432297	7.35e-42	4.33e-35	4.33e-35	-13.5564	12.3601	5628	5699	0.000540839	0.000554745	0.000547792	-0.283086	0.285573	9.98e-89	5.84e-91	9.98e-89	-19.973	20.2283	5689	5721	0.000211144	0.000186955	0.00019905	-0.120675	0.112889	2.12e-36	2e-32	2e-32	-12.6004	11.8566	5719	5777
AACCATCT	AGATGGTT	2.64e-05	1.27e-05	1.96e-05	-0.0183498	0.0126556	1.23e-05	0.00243843	0.00243843	-4.37196	3.03089	3988	4016	0.00129905	0.000951751	0.0011254	-0.523472	0.445876	2.1e-210	1.12e-154	1.12e-154	-30.9662	26.5009	4008	4031	0.000196528	0.000216037	0.000206282	-0.137714	0.143139	5.35e-34	3.33e-37	5.35e-34	-12.1564	12.7456	4105	4161
AACCCAAA	TTTGGGTT	0.000281958	0.000255508	0.000268733	-0.044118	0.0415	2.94e-46	4.4e-42	4.4e-42	-14.2804	13.594	7286	7381	0.00122336	0.00112242	0.00117289	-0.374588	0.353196	2.93e-198	4.61e-182	4.61e-182	-30.0494	28.7815	7297	7461	0.000534744	0.000560537	0.000547641	-0.167468	0.168675	1.9e-89	1.14e-93	1.9e-89	-20.0557	20.534	7477	7657
AACCCACA	TGTGGGTT	0.000143017	0.000168213	0.000155615	-0.0374816	0.0408077	2.71e-24	2.77e-28	2.71e-24	-10.1698	11.0295	5049	5077	0.00108356	0.00113357	0.00110857	-0.418154	0.431808	7.92e-176	7.49e-184	7.92e-176	-28.2784	28.9243	5064	5078	0.000540179	0.000481596	0.000510887	-0.200373	0.190931	2.45e-90	9.59e-81	9.59e-81	-20.1574	19.0325	5154	5168
AACCCAGA	TCTGGGTT	1.08e-05	1.13e-05	1.11e-05	-0.0094423	0.00974301	0.00518612	0.00422753	0.00518612	-2.79525	2.86067	6129	5991	0.00136625	0.00125373	0.00130999	-0.431462	0.418992	3.46e-221	3.94e-203	3.94e-203	-31.7581	30.4205	6182	6002	0.000431353	0.000381831	0.000406592	-0.164594	0.156877	1.63e-72	2.12e-64	2.12e-64	-18.0119	16.946	6284	6113
AACCCAGG	CCTGGGTT	0.00209262	0.00220926	0.00215094	0.0930904	-0.0955401	0	0	0	38.9392	-40.0121	12271	12327	9.5e-05	6.59e-05	8.05e-05	-0.0795051	0.0661228	5.73e-17	3.18e-12	3.18e-12	-8.37087	6.96973	12731	12788	5.71e-05	8.54e-05	7.12e-05	0.0420582	-0.0514557	5.78e-11	1.13e-15	5.78e-11	6.54932	-8.01231	12790	12815
AACCCCAA	TTGGGGTT	3.99e-06	2.97e-06	3.48e-06	-0.00668417	0.00574517	0.0896048	0.142709	0.142709	-1.69749	1.46578	4413	4471	0.000412015	0.000424591	0.000418303	-0.27528	0.279252	4.9e-68	4.67e-70	4.9e-68	-17.4316	17.6958	4483	4526	0.000186596	0.000205118	0.000195857	-0.125463	0.131143	2.29e-32	2.07e-35	2.29e-32	-11.8452	12.4192	4582	4593
AACCCCAT	ATGGGGTT	0.00149341	0.00143671	0.00146506	0.0798164	-0.0785683	5.35e-237	4.49e-228	4.49e-228	32.8853	-32.254	12025	11964	0.00133452	0.00127775	0.00130613	-0.303378	0.298115	4.29e-216	5.51e-207	5.51e-207	-31.3866	30.7109	12387	12307	5.17e-05	2.92e-05	4.05e-05	-0.0407819	0.0307889	4.48e-10	2.75e-06	2.75e-06	-6.23633	4.68889	12444	12367
AACCCCGG	NA	3.83e-05	NA	3.83e-05	0.0511359	NA	1.43e-07	NA	1.43e-07	5.26084	NA	724	NA	1.27e-06	NA	1.27e-06	-0.0357907	NA	0.332907	NA	0.332907	-0.968275	NA	750	NA	4.79e-06	NA	4.79e-06	0.0456936	NA	0.0578156	NA	0.0578156	1.8971	NA	739	NA
AACCCCGT	ACGGGGTT	0.00443142	0.00420011	0.00431577	0.168707	-0.162585	0	0	0	56.7314	-55.2246	7986	8089	4.28e-06	8.89e-08	2.18e-06	-0.0208961	-0.00299283	0.0756725	0.797921	0.797921	-1.77637	-0.256039	8377	8422	0.000843589	0.000969295	0.000906442	0.200975	-0.214176	5.33e-140	1.43e-160	5.33e-140	25.194	-27.0077	8355	8394
AACCCGGA	TCCGGGTT	5.81e-05	8.71e-05	7.26e-05	0.0670923	-0.0771759	8.93e-11	2.12e-15	8.93e-11	6.48408	-7.93454	648	744	3.53e-05	8.33e-06	2.18e-05	-0.211493	0.0973572	3.35e-07	0.0132116	0.0132116	-5.10265	2.47802	666	745	2.78e-06	2.68e-06	2.73e-06	0.0405791	-0.037895	0.147976	0.156067	0.156067	1.44672	-1.41843	665	740
AACCCGGG	CCCGGGTT	0.00323883	0.0036351	0.00343697	0.15733	-0.167008	0	0	0	48.4715	-51.3614	6679	6646	3e-05	1.84e-05	2.42e-05	-0.0603305	0.0472303	2.56e-06	0.000231642	0.000231642	-4.70298	3.68176	7010	7004	0.000230189	0.000297265	0.000263727	0.114442	-0.130316	1.58e-39	1.55e-50	1.58e-39	13.1565	-14.9515	7000	6965
AACCCGTC	GACGGGTT	0.000127295	0.000184283	0.000155789	0.0935073	-0.115493	8.46e-22	7.93e-31	8.46e-22	9.59449	-11.5444	741	706	8.99e-08	9.85e-08	9.42e-08	-0.00993931	0.0106312	0.79679	0.787539	0.79679	-0.257504	0.269507	772	742	1.25e-05	1.58e-05	1.42e-05	0.0804682	-0.0924998	0.00218285	0.000559247	0.00218285	3.06417	-3.45066	766	738
AACCCTAA	TTAGGGTT	9.05e-05	1.86e-05	5.46e-05	0.0276625	0.0168279	5.91e-16	0.000241712	0.000241712	8.09128	3.6709	2912	2932	0.000136369	0.000224049	0.000180209	-0.160785	0.216452	1.16e-23	8.32e-38	1.16e-23	-10.0272	12.8532	2949	2988	6.32e-05	8.42e-05	7.37e-05	-0.0742771	0.0810616	5.45e-12	1.76e-15	5.45e-12	-6.89352	7.95719	3019	3067
AACCCTAG	CTAGGGTT	3.79e-05	3.82e-05	3.8e-05	-0.0267774	0.0275477	1.68e-07	1.45e-07	1.68e-07	-5.23166	5.2588	2684	2564	0.00257911	0.00260119	0.00259015	-0.906232	0.928585	0	0	0	-43.6605	43.8474	2659	2553	0.000557146	0.000456247	0.000506696	-0.285102	0.263019	4.08e-93	1.36e-76	1.36e-76	-20.4717	18.5246	2719	2615
AACCCTCA	TGAGGGTT	1.47e-05	1.04e-05	1.25e-05	-0.0145518	0.0123496	0.00112982	0.00611509	0.00611509	-3.25604	2.74155	3507	3439	0.000183821	0.000130606	0.000157213	-0.208873	0.178723	2.53e-31	9.93e-23	9.93e-23	-11.6421	9.813	3558	3436	4.18e-05	2.68e-05	3.43e-05	-0.067638	0.0550859	2.11e-08	7.19e-06	7.19e-06	-5.60313	4.48807	3599	3476
AACCCTGT	ACAGGGTT	0.00224291	0.00234145	0.00229218	0.109713	-0.112091	0	0	0	40.3163	-41.1945	9472	9458	4.72e-06	4.5e-07	2.58e-06	-0.0201625	0.00622283	0.0621608	0.564809	0.564809	-1.86515	0.575713	9795	9821	0.00024401	0.000163974	0.000203992	0.0990222	-0.0812209	8.48e-42	1.21e-28	1.21e-28	13.5458	-11.1038	9835	9850
AACCCTTC	GAAGGGTT	4.26e-06	4.67e-06	4.46e-06	-0.00799849	0.008426	0.0793502	0.066267	0.0793502	-1.75447	1.83662	3383	3343	0.00104232	0.00118055	0.00111144	-0.514827	0.548962	3.29e-169	2.17e-191	3.29e-169	-27.7344	29.5183	3323	3310	0.000448489	0.000501585	0.000475037	-0.229125	0.242555	2.54e-75	5.11e-84	2.54e-75	-18.3663	19.4236	3385	3375
AACCTAAA	TTTAGGTT	9.48e-05	0.000170383	0.000132594	-0.0302272	0.0403024	1.24e-16	1.26e-28	1.24e-16	-8.27987	11.1004	5184	5253	0.000322933	0.000387037	0.000354985	-0.226009	0.245391	1.02e-53	5.05e-64	1.02e-53	-15.4319	16.8948	5263	5364	0.000213483	0.000268841	0.000241162	-0.123503	0.137794	8.75e-37	7.13e-46	8.75e-37	-12.67	14.2185	5458	5534
AACCTACA	TGTAGGTT	0.000107032	8.89e-05	9.8e-05	-0.0367672	0.0338326	1.4e-18	1.06e-15	1.06e-15	-8.79766	8.0196	3957	3896	0.00251673	0.00241761	0.00246717	-0.731922	0.721926	0	0	0	-43.1279	42.2679	3936	3867	0.000511931	0.000434714	0.000473323	-0.222686	0.206497	1.03e-85	4.58e-73	4.58e-73	-19.623	18.082	4054	3981
AACCTAGA	TCTAGGTT	4.79e-05	2.27e-05	3.53e-05	-0.0258534	0.0176006	4.03e-09	5.04e-05	5.04e-05	-5.8831	4.05357	3600	3690	0.000295358	0.000318105	0.000306732	-0.260857	0.268102	2.77e-49	6.09e-53	2.77e-49	-14.7581	15.3161	3638	3705	0.000162556	0.000216598	0.000189577	-0.130377	0.148918	2.07e-28	2.69e-37	2.07e-28	-11.0557	12.7621	3751	3833
AACCTAGG	CCTAGGTT	2.97e-05	2.03e-05	2.5e-05	-0.0206675	0.0171554	3.56e-06	0.000129864	0.000129864	-4.63539	3.82674	3551	3495	0.0024683	0.00241863	0.00244346	-0.770969	0.766605	0	0	0	-42.7099	42.2768	3530	3478	0.000486638	0.000466943	0.00047679	-0.231474	0.227611	1.43e-81	2.41e-78	2.41e-78	-19.1319	18.7406	3617	3569
AACCTCAG	CTGAGGTT	0.000117723	5.62e-05	8.69e-05	-0.0323701	0.0222567	2.8e-20	1.86e-10	1.86e-10	-9.22665	6.3726	5616	5748	4.21e-05	8.78e-06	2.54e-05	-0.0780175	0.0354641	2.57e-08	0.0109324	0.0109324	-5.56862	2.54486	5773	5898	4.7e-05	3.51e-05	4.11e-05	-0.0561437	0.0483233	2.79e-09	2.77e-07	2.77e-07	-5.94353	5.13851	5819	5949
AACCTCCA	TGGAGGTT	0.00121395	0.00125973	0.00123684	-0.0816062	0.0827002	5.13e-193	3.21e-200	5.13e-193	-29.645	30.1995	9321	9379	3.21e-06	7.35e-07	1.97e-06	-0.0169105	0.00803566	0.123716	0.461641	0.461641	-1.53936	0.736148	9568	9661	7.53e-05	3.89e-05	5.71e-05	-0.0558539	0.0399299	5.31e-14	6.45e-08	6.45e-08	-7.52423	5.40605	9623	9687
AACCTCCC	GGGAGGTT	0.000132539	7.06e-05	0.000101581	-0.0391907	0.0286013	1.25e-22	8.92e-13	8.92e-13	-9.79011	7.14628	4366	4354	6.36e-05	5.95e-05	6.15e-05	-0.109598	0.105235	7.46e-12	3.58e-11	3.58e-11	-6.84872	6.62066	4456	4507	1.25e-05	1.15e-05	1.2e-05	-0.0331763	0.0315968	0.00220068	0.00330069	0.00330069	-3.06173	2.93826	4464	4523
AACCTCCG	CGGAGGTT	0.00262988	0.00260466	0.00261727	-0.152403	0.151554	0	0	0	-43.6644	43.454	5794	5801	2.05e-05	2.66e-05	2.35e-05	0.0538638	-0.0611456	0.000101482	9.59e-06	0.000101482	3.88704	-4.42625	6023	6062	8.94e-05	6.93e-05	7.93e-05	-0.0769185	0.0675856	2.48e-16	5.2e-13	5.2e-13	-8.19647	7.22012	6031	6063
AACCTCTG	CAGAGGTT	0.00215999	0.00205002	0.002105	-0.0961502	0.0934743	0	0	0	-39.5624	38.54	11899	11835	3.55e-06	4.43e-06	3.99e-06	0.0156395	-0.0174598	0.105725	0.0707903	0.105725	1.61771	-1.80682	12307	12212	7.17e-05	4.37e-05	5.77e-05	-0.0480375	0.0375006	2.09e-13	1e-08	1e-08	-7.34335	5.72998	12343	12228
AACCTGCA	TGCAGGTT	0.000252632	0.00022754	0.000240086	-0.051499	0.0491162	1.25e-41	1.15e-37	1.15e-37	-13.5172	12.8282	4790	4770	0.000149636	0.000188277	0.000168957	-0.15767	0.176919	8.34e-26	4.84e-32	8.34e-26	-10.5037	11.7824	5039	5067	0.000186677	0.000188518	0.000187598	-0.120071	0.120414	2.23e-32	1.11e-32	2.23e-32	-11.8477	11.906	5078	5131
AACCTGGG	CCCAGGTT	0.00283643	0.00276811	0.00280227	0.111184	-0.110242	0	0	0	45.3514	-44.8003	11331	11266	1.34e-05	2.23e-05	1.78e-05	-0.0305036	0.0394986	0.00169091	5.1e-05	0.00169091	-3.13976	4.05087	11823	11752	5.11e-05	6.43e-05	5.77e-05	0.040782	-0.0458638	5.7e-10	3.54e-12	5.7e-10	6.19851	-6.95452	11838	11796
AACCTGTC	NA	5.69e-05	NA	5.69e-05	0.0322648	NA	1.43e-10	NA	1.43e-10	6.41325	NA	2761	NA	2.71e-06	NA	2.71e-06	-0.0281802	NA	0.157313	NA	0.157313	-1.41417	NA	2866	NA	1.08e-07	NA	1.08e-07	-0.00382633	NA	0.775482	NA	0.775482	-0.285212	NA	2908	NA
AACCTTAA	TTAAGGTT	3.12e-05	6.66e-05	4.89e-05	-0.0207511	0.030149	2.07e-06	4e-12	2.07e-06	-4.74617	6.93715	3652	3709	0.000381329	0.000455093	0.000418211	-0.293388	0.317073	4.18e-63	5.88e-75	4.18e-63	-16.7697	18.3207	3723	3812	0.000226106	0.000178457	0.000202282	-0.152018	0.133853	7.38e-39	5e-31	5e-31	-13.0393	11.5839	3854	3928
AACGTGGT	ACCACGTT	0.000128255	0.000103261	0.000115758	0.0710051	-0.0647389	5.96e-22	5.57e-18	5.57e-18	9.63059	-8.64129	1292	1260	1.03e-06	6.46e-06	3.74e-06	0.0254483	-0.0652126	0.38457	0.029147	0.38457	0.869508	-2.1815	1340	1293	2.93e-05	3.12e-05	3.02e-05	0.0925945	-0.0979366	2.72e-06	1.26e-06	2.72e-06	4.69065	-4.84534	1353	1299
AACTAAAA	TTTTAGTT	9.98e-05	0.000163984	0.000131896	-0.0227138	0.0288039	1.97e-17	1.29e-27	1.97e-17	-8.49551	10.8899	9543	9646	0.000778809	0.000878361	0.000828585	-0.253226	0.267703	6.32e-127	6.69e-143	6.32e-127	-23.9705	25.4577	9952	9981	0.00036048	0.000430194	0.000395337	-0.114993	0.125173	6.68e-61	2.52e-72	6.68e-61	-16.4652	17.9877	10450	10458
AACTAAAC	GTTTAGTT	4.65e-05	5.83e-05	5.24e-05	-0.0246338	0.029014	6.62e-09	8.38e-11	6.62e-09	-5.80031	6.49374	3638	3410	0.000269846	0.000133572	0.000201709	-0.251232	0.179149	3.53e-45	3.29e-23	3.29e-23	-14.1062	9.92382	3356	3412	4.76e-05	7.21e-05	5.98e-05	-0.070904	0.0886052	2.23e-09	1.79e-13	2.23e-09	-5.98002	7.36378	3490	3536
AACTAAAG	CTTTAGTT	0.000107628	0.000172479	0.000140054	-0.0323258	0.0412123	1.13e-18	5.85e-29	1.13e-18	-8.82214	11.1685	5198	5119	0.00229201	0.002424	0.002358	-0.606379	0.628589	0	0	0	-41.1527	42.3239	5234	5160	0.000451356	0.000473976	0.000462666	-0.180628	0.186829	8.61e-76	1.7e-79	8.61e-76	-18.425	18.8812	5440	5345
AACTAAAT	ATTTAGTT	7.06e-05	3.12e-05	5.09e-05	-0.0247435	0.0163254	9.12e-13	2.01e-06	2.01e-06	-7.14331	4.75254	5773	5886	0.000184034	0.000227326	0.00020568	-0.159774	0.175891	2.34e-31	2.47e-38	2.34e-31	-11.6488	12.9469	6016	6140	0.000116638	0.000105193	0.000110915	-0.085013	0.0800518	7.65e-21	5.94e-19	5.94e-19	-9.3647	8.89335	6312	6422
AACTAACA	TGTTAGTT	0.000171847	0.000183433	0.00017764	-0.0448277	0.0459542	7.37e-29	1.08e-30	7.37e-29	-11.148	11.5177	4344	4357	0.000600773	0.000778742	0.000689757	-0.339711	0.383387	2.38e-98	6.48e-127	2.38e-98	-21.0513	23.9695	4394	4431	0.000134719	0.000180148	0.000157434	-0.108132	0.124555	7.95e-24	2.64e-31	7.95e-24	-10.0645	11.6387	4555	4552
AACTAAGA	NA	9.04e-05	NA	9.04e-05	-0.0326759	NA	6.12e-16	NA	6.12e-16	-8.08717	NA	4275	NA	0.000594816	NA	0.000594816	-0.338093	NA	2.15e-97	NA	2.15e-97	-20.9466	NA	4373	NA	0.000172339	NA	0.000172339	-0.122339	NA	5.08e-30	NA	5.08e-30	-11.3836	NA	4533	NA
AACTAATA	NA	4.55e-05	NA	4.55e-05	-0.0218961	NA	9.88e-09	NA	9.88e-09	-5.73285	NA	4703	NA	9.35e-05	NA	9.35e-05	-0.125095	NA	1.02e-16	NA	1.02e-16	-8.30319	NA	4944	NA	2.12e-05	NA	2.12e-05	-0.0397582	NA	6.64e-05	NA	6.64e-05	-3.98878	NA	5183	NA
AACTACAA	TTGTAGTT	0.000241934	0.000243547	0.00024274	-0.0468777	0.0475136	6.13e-40	3.41e-40	6.13e-40	-13.2278	13.2719	5497	5444	0.00291682	0.00247148	0.00269415	-0.661532	0.613843	0	0	0	-46.4389	42.7374	5556	5511	0.000657371	0.00057713	0.000617251	-0.211336	0.199083	1.6e-109	2.18e-96	2.18e-96	-22.2381	20.8359	5741	5721
AACTACAC	GTGTAGTT	2.53e-05	4.77e-05	3.65e-05	-0.0242086	0.0334014	1.89e-05	4.25e-09	1.89e-05	-4.2773	5.87422	2049	2128	0.00024523	0.000253842	0.000249536	-0.312223	0.316194	3.23e-41	1.33e-42	3.23e-41	-13.4472	13.6814	2082	2103	9.45e-05	7.74e-05	8.59e-05	-0.13029	0.117592	3.51e-17	2.37e-14	2.37e-14	-8.42827	7.62878	2145	2174
AACTACAG	CTGTAGTT	0.000238719	0.000212308	0.000225514	-0.052328	0.0493531	1.97e-39	2.94e-35	2.94e-35	-13.1396	12.3913	4427	4409	0.000248235	0.000179983	0.000214109	-0.214513	0.183198	1.06e-41	1.05e-30	1.05e-30	-13.5294	11.5199	4509	4517	4.87e-05	3.46e-05	4.16e-05	-0.0641298	0.0542013	1.44e-09	3.42e-07	3.42e-07	-6.05128	5.09864	4640	4646
AACTACCA	TGGTAGTT	0.000121781	0.000193469	0.000157625	-0.0367046	0.0475305	6.35e-21	2.79e-32	6.35e-21	-9.38433	11.8287	4582	4321	0.00460019	0.00463645	0.00461832	-0.928192	0.963575	0	0	0	-58.3689	58.5995	4503	4169	0.000993941	0.0012276	0.00111077	-0.290937	0.334002	1.33e-164	7.77e-203	1.33e-164	-27.3492	30.398	4641	4310
AACTAGAA	TTCTAGTT	0.000232074	0.000243701	0.000237887	-0.0385396	0.0395542	2.21e-38	3.22e-40	2.21e-38	-12.9554	13.2761	7759	7807	0.00295567	0.00326734	0.00311151	-0.566336	0.599469	0	0	0	-46.748	49.1587	7647	7610	0.00120811	0.00115411	0.00118111	-0.242143	0.238513	1.2e-199	8.22e-191	8.22e-191	-30.1553	29.473	8003	7947
AACTATAA	TTATAGTT	9.59e-05	0.000117204	0.000106533	-0.0297551	0.0318956	8.38e-17	3.38e-20	8.38e-17	-8.32594	9.20629	5428	5737	0.000490859	0.000400246	0.000445552	-0.266142	0.23354	1.06e-80	3.81e-66	3.81e-66	-19.0273	17.1808	5725	6062	0.000175777	0.000160983	0.00016838	-0.105975	0.0985649	1.38e-30	3.75e-28	3.75e-28	-11.4966	11.0021	6068	6407
AACTATAC	GTATAGTT	0.000180333	0.000251732	0.000216033	-0.0542119	0.0645117	3.34e-30	1.74e-41	3.34e-30	-11.42	13.4931	3110	3060	0.00513573	0.00406983	0.00460278	-1.17805	1.06719	0	0	0	-61.6895	54.8866	3121	3016	0.000807581	0.000655341	0.000731461	-0.310548	0.282577	4.16e-134	3.43e-109	3.43e-109	-24.65	22.2037	3305	3239
AACTATCA	TGATAGTT	9.63e-05	0.000130227	0.00011324	-0.0354309	0.040808	7.26e-17	2.9e-22	7.26e-17	-8.34285	9.70435	3840	3942	0.000581887	0.000674806	0.000628347	-0.353996	0.393186	2.56e-95	3.11e-110	2.56e-95	-20.7175	22.3115	3868	3661	0.000188511	0.000193052	0.000190781	-0.135701	0.141458	1.11e-32	1.99e-33	1.11e-32	-11.9058	12.0484	3998	3793
AACTATCC	GGATAGTT	0.000124775	7.77e-05	0.000101249	-0.0519163	0.0418372	2.12e-21	6.54e-14	6.54e-14	-9.49902	7.4969	2344	2259	0.00159683	0.00167459	0.00163571	-0.764079	0.799389	3.47e-258	1.15e-270	3.47e-258	-34.3375	35.165	2306	2220	0.00051525	0.000480077	0.000497664	-0.290777	0.285573	2.96e-86	1.7e-80	1.7e-80	-19.6866	19.0024	2408	2337
AACTATTC	GAATAGTT	2.76e-05	3e-05	2.88e-05	-0.0194091	0.0200278	8.04e-06	3.18e-06	8.04e-06	-4.46423	4.65868	3671	3766	0.000851295	0.00100962	0.000930458	-0.435162	0.470749	1.47e-138	5.79e-164	1.47e-138	-25.0621	27.2955	3759	3817	0.000349432	0.000450421	0.000399926	-0.187111	0.210816	4.32e-59	1.22e-75	4.32e-59	-16.2109	18.4059	3913	3978
AACTCAAA	TTTGAGTT	0.000227898	0.000159155	0.000193527	-0.0390357	0.0325727	1.01e-37	7.53e-27	7.53e-27	-12.8383	10.7283	7464	7467	0.00154482	0.00160038	0.0015726	-0.413255	0.420856	7.69e-250	9.32e-259	7.69e-250	-33.7728	34.3758	7517	7491	0.000447092	0.000454492	0.000450792	-0.149391	0.150269	4.3e-75	2.64e-76	4.3e-75	-18.3377	18.4889	7806	7815
AACTCAAC	GTTGAGTT	2.12e-05	8.93e-06	1.51e-05	-0.0186025	0.0121504	8.88e-05	0.0110649	0.0110649	-3.91932	2.54065	3036	3050	0.000332969	0.000258842	0.000295905	-0.301176	0.267824	2.48e-55	2.08e-43	2.08e-43	-15.6699	13.8155	3029	3028	5.93e-05	8.96e-05	7.45e-05	-0.0856917	0.106421	2.4e-11	2.29e-16	2.4e-11	-6.67947	8.20621	3121	3110
AACTCACT	AGTGAGTT	0.000196693	0.000172422	0.000184557	-0.0438202	0.0407216	8.64e-33	5.97e-29	5.97e-29	-11.9268	11.1666	5195	5269	0.000664033	0.000846077	0.000755055	-0.332067	0.36914	1.67e-108	1.01e-137	1.67e-108	-22.1326	24.9851	5090	5218	0.000412802	0.000528125	0.000470463	-0.177029	0.196817	1.78e-69	2.3e-88	1.78e-69	-17.6202	19.9311	5223	5361
AACTCATT	AATGAGTT	6.94e-05	9.63e-05	8.28e-05	-0.0231622	0.0273171	1.4e-12	7.17e-17	1.4e-12	-7.08398	8.34441	6564	6529	0.000627802	0.000649425	0.000638613	-0.281993	0.28672	1.09e-102	3.69e-106	1.09e-102	-21.5199	21.8876	6665	6651	0.000375871	0.000488363	0.000432117	-0.147061	0.167471	2.01e-63	7.48e-82	2.01e-63	-16.8132	19.1658	6882	6869
AACTCCAA	TTGGAGTT	2e-05	1.24e-05	1.62e-05	-0.0144264	0.0113115	0.000141692	0.00273221	0.00273221	-3.80522	2.99637	4846	4913	0.000704327	0.00064345	0.000673889	-0.347759	0.331311	5.68e-115	3.36e-105	3.36e-105	-22.7946	21.7866	4886	4946	0.000200605	0.000197586	0.000199096	-0.125656	0.124443	1.14e-34	3.58e-34	3.58e-34	-12.2818	12.1891	4989	5038
AACTCCAT	ATGGAGTT	0.000376239	0.000551455	0.000463847	0.0551222	-0.0666077	3.96e-61	9.82e-89	3.96e-61	16.4969	-19.9739	6232	6300	8.68e-05	7.33e-05	8.01e-05	-0.106492	0.0978072	1.25e-15	1.94e-13	1.94e-13	-7.99969	7.35302	6418	6475	1.94e-05	5.33e-06	1.24e-05	-0.0342183	0.017937	0.000134832	0.0452326	0.0452326	-3.81748	2.00249	6504	6560
AACTCCCA	TGGGAGTT	0.000137555	0.000111655	0.000124605	-0.0341154	0.0310127	1.99e-23	2.58e-19	2.58e-19	-9.97369	8.98568	6007	5889	0.00060325	0.00067237	0.00063781	-0.298135	0.310956	9.53e-99	7.65e-110	9.53e-99	-21.0946	22.2711	5736	5877	0.000317599	0.000427793	0.000372696	-0.147528	0.169463	7.16e-54	6.23e-72	7.16e-54	-15.4546	17.9374	5777	5897
AACTCCCG	CGGGAGTT	0.000527041	0.000448359	0.0004877	-0.131597	0.123656	6.87e-85	1.71e-72	1.71e-72	-19.5265	18.0093	1551	1486	2.89e-06	4.98e-07	1.69e-06	0.0395233	-0.016156	0.144584	0.544526	0.544526	1.45893	-0.605983	1569	1538	9.83e-05	0.000114529	0.000106421	-0.158044	0.17262	8.16e-18	1.7e-20	8.16e-18	-8.59758	9.27964	1568	1528
AACTCCGT	ACGGAGTT	0.000604857	0.000584451	0.000594654	0.127082	-0.116631	3.82e-97	6.25e-94	6.25e-94	20.9192	-20.5631	1893	2167	4.77e-06	4.57e-06	4.67e-06	-0.045546	0.0436873	0.0607201	0.0664056	0.0664056	-1.87553	1.83568	1937	2012	1.87e-05	1.39e-05	1.63e-05	0.0617081	-0.0521602	0.000177895	0.00121756	0.00121756	3.74852	-3.23475	1936	2013
AACTCCTA	TAGGAGTT	0.000105578	0.00012525	0.000115414	-0.03574	0.0382224	2.38e-18	1.79e-21	2.38e-18	-8.73771	9.51708	4178	4337	1.96e-05	1.25e-05	1.6e-05	-0.061956	0.0484202	0.000146054	0.00242718	0.00242718	-3.79771	3.03229	4296	4479	5.22e-07	1.86e-05	9.58e-06	-0.00686942	0.0402372	0.531049	0.000181027	0.531049	-0.626407	3.74414	4365	4543
AACTCCTG	CAGGAGTT	0.00643795	0.00676867	0.00660331	-0.110805	0.114064	0	0	0	-68.4485	70.1963	25944	25877	2.51e-05	6.8e-05	4.66e-05	0.0276292	-0.0457251	1.69e-05	1.42e-12	1.69e-05	4.30176	-7.08194	27100	26974	0.000305653	0.000218867	0.00026226	-0.065937	0.0560485	6.52e-52	1.14e-37	1.14e-37	-15.1611	12.8288	27126	27036
AACTCGGG	CCCGAGTT	5.88e-05	9.31e-05	7.6e-05	0.0568076	-0.0720523	7.07e-11	2.28e-16	7.07e-11	6.51932	-8.20662	922	911	1.12e-06	4.18e-06	2.65e-06	-0.0315639	0.0616325	0.364064	0.0790098	0.364064	-0.907649	1.75646	946	938	2.16e-05	8.74e-07	1.12e-05	0.0947474	-0.0192671	5.61e-05	0.417581	0.417581	4.02857	-0.810625	950	939
AACTCGTC	GACGAGTT	0.000215764	0.000146888	0.000181326	0.108378	-0.0892322	8.35e-36	6.61e-25	6.61e-25	12.4918	-10.3065	933	937	5.98e-05	6.4e-05	6.19e-05	0.223019	-0.229832	3.2e-11	6.57e-12	3.2e-11	6.63739	-6.86681	1017	1025	6.24e-05	6.79e-05	6.52e-05	0.155839	-0.160988	7.38e-12	9e-13	7.38e-12	6.85017	-7.14513	1019	1039
AACTCTCA	TGAGAGTT	5.62e-06	7.45e-05	4.01e-05	-0.00698471	0.0276035	0.0437731	2.11e-13	0.0437731	-2.01626	7.34153	5838	4932	0.000469764	0.000491163	0.000480463	-0.281005	0.288287	2.59e-77	9.47e-81	2.59e-77	-18.6138	19.0332	5012	4960	0.000299663	0.000370293	0.000334978	-0.15209	0.169356	6.26e-51	1.65e-62	6.26e-51	-15.0117	16.6879	5111	5078
AACTCTGT	ACAGAGTT	0.000261586	3.3e-05	0.000147296	0.042374	0.0115461	4.83e-43	1.03e-06	1.03e-06	13.7547	4.88526	7262	9975	1.8e-06	7.37e-07	1.27e-06	-0.0147352	-0.00954953	0.248939	0.461211	0.461211	-1.15293	-0.736855	6956	6805	2.47e-08	1.01e-06	5.16e-07	0.00117183	0.00758239	0.891666	0.38441	0.891666	0.136197	0.869799	7049	6910
AACTCTTG	CAAGAGTT	0.000104233	9.13e-05	9.78e-05	-0.0326753	0.0305162	3.9e-18	4.51e-16	4.51e-16	-8.68187	8.12426	4935	4943	2.41e-06	5.25e-06	3.83e-06	0.0200352	-0.0294496	0.182909	0.0491643	0.182909	1.33185	-1.96717	5049	5081	4.03e-06	1e-07	2.06e-06	-0.0175817	0.00276438	0.0817611	0.783737	0.783737	-1.74056	0.274452	5145	5157
AACTGAAA	TTTCAGTT	0.000117326	0.000110767	0.000114047	-0.0245851	0.0235035	3.24e-20	3.57e-19	3.57e-19	-9.21108	8.94989	9658	9983	0.000732783	0.000739848	0.000736316	-0.248011	0.244899	1.54e-119	1.13e-120	1.54e-119	-23.2509	23.3628	9887	10229	0.000239041	0.000196078	0.000217559	-0.0950659	0.0848262	5.55e-41	6.34e-34	6.34e-34	-13.4072	12.1424	10270	10598
AACTGCTT	AAGCAGTT	6.32e-05	0.000130822	9.7e-05	0.0240567	-0.0346258	1.38e-11	2.33e-22	1.38e-11	6.75981	-9.72648	5512	5520	6.48e-07	1.5e-06	1.08e-06	0.0100257	-0.0151601	0.48939	0.292405	0.48939	0.69128	-1.05286	5416	5518	3.85e-05	3.74e-05	3.8e-05	0.0522979	-0.0513242	7.41e-08	1.13e-07	1.13e-07	5.38102	-5.30432	5539	5614
AACTGGAA	TTCCAGTT	0.000184902	0.000138802	0.000161852	-0.0348277	0.0302594	6.33e-31	1.26e-23	1.26e-23	-11.5637	10.0188	7679	7644	0.000598361	0.00059243	0.000595396	-0.254583	0.253112	5.81e-98	5.2e-97	5.2e-97	-21.0089	20.9045	7750	7757	5.19e-05	2.4e-05	3.79e-05	-0.0506695	0.0344459	4.26e-10	2.19e-05	2.19e-05	-6.24433	4.24445	7939	7928
AACTTAAA	TTTAAGTT	0.000262648	0.000308526	0.000285587	-0.0378916	0.0413399	3.28e-43	1.89e-50	3.28e-43	-13.7826	14.9383	9078	8996	0.000547771	0.000647001	0.000597386	-0.215875	0.236264	7.69e-90	9.04e-106	7.69e-90	-20.1007	21.8467	9697	9600	0.000335383	0.000371659	0.000353521	-0.11353	0.120365	8.69e-57	9.84e-63	8.69e-57	-15.8815	16.7187	10082	9952
AACTTACA	TGTAAGTT	0.000310211	0.000308045	0.000309128	-0.0554751	0.05505	1.02e-50	2.25e-50	2.25e-50	-14.979	14.9266	5072	5118	0.000944926	0.000994352	0.000969639	-0.391798	0.401156	1.39e-153	1.63e-161	1.39e-153	-26.4056	27.0881	5179	5186	0.000263638	0.000192911	0.000228275	-0.139463	0.11919	5.09e-45	2.1e-33	2.1e-33	-14.0803	12.044	5324	5333
AACTTCAA	TTGAAGTT	6.71e-05	7.1e-05	6.91e-05	-0.0259539	0.0264302	3.24e-12	7.64e-13	3.24e-12	-6.96721	7.16758	5024	5133	0.000303439	0.000348656	0.000326047	-0.223591	0.237478	1.39e-50	7.45e-58	1.39e-50	-14.9587	16.0349	5119	5201	0.000135618	0.000178737	0.000157178	-0.0999555	0.114066	5.66e-24	4.5e-31	5.66e-24	-10.098	11.593	5349	5412
AACTTCAG	CTGAAGTT	8.52e-05	7.56e-05	8.04e-05	-0.0274376	0.025701	4.19e-15	1.41e-13	1.41e-13	-7.84934	7.39568	5752	5803	0.000639487	0.000635971	0.000637729	-0.304606	0.302021	1.45e-104	5.33e-104	5.33e-104	-21.7194	21.6595	5832	5892	0.000439512	0.000462753	0.000451132	-0.171216	0.174778	7.5e-74	1.17e-77	7.5e-74	-18.1815	18.6562	5938	5992
AACTTCCG	NA	6.72e-05	NA	6.72e-05	-0.0690416	NA	3.2e-12	NA	3.2e-12	-6.96883	NA	720	NA	6.53e-09	NA	6.53e-09	-0.00282056	NA	0.94467	NA	0.94467	-0.0694019	NA	699	NA	1.19e-05	NA	1.19e-05	-0.082331	NA	0.0027589	NA	0.0027589	-2.99341	NA	701	NA
AACTTCTG	CAGAAGTT	0.000107769	0.000115455	0.000111612	-0.0282264	0.0290423	1.07e-18	6.42e-20	1.07e-18	-8.82791	9.13732	6845	6909	4.31e-08	4.9e-08	4.6e-08	-0.00227638	-0.00243166	0.858504	0.849284	0.858504	-0.178278	-0.190032	7001	6959	7.88e-07	2.14e-07	5.01e-07	-0.00661876	0.00344974	0.441588	0.68832	0.68832	-0.769515	0.401136	7085	7073
AACTTGTT	NA	1.32e-05	NA	1.32e-05	0.0121352	NA	0.00203853	NA	0.00203853	3.08457	NA	4500	NA	0.000163779	NA	0.000163779	0.172691	NA	4.34e-28	NA	4.34e-28	10.989	NA	4612	NA	0.000172811	NA	0.000172811	0.119691	NA	4.25e-30	NA	4.25e-30	11.3992	NA	4745	NA
AACTTTTT	NA	8.38e-07	NA	8.38e-07	0.0018823	NA	0.43645	NA	0.43645	0.778203	NA	11682	NA	0.000207099	NA	0.000207099	0.117121	NA	4.48e-35	NA	4.48e-35	12.3574	NA	12384	NA	0.000211747	NA	0.000211747	0.0795152	NA	1.69e-36	NA	1.69e-36	12.6184	NA	12859	NA
AAGAAAAA	TTTTTCTT	0.000319883	0.000326653	0.000323268	0.0190614	-0.0191354	3.05e-52	2.61e-53	3.05e-52	15.2108	-15.371	35066	35113	0.0020777	0.00196438	0.00202104	-0.193773	0.187327	0	3.5640294918295e-317	3.5640294918295e-317	-39.1774	38.0919	36552	36463	0.00148728	0.00127296	0.00138012	-0.110354	0.101476	2.5e-245	2.94e-210	2.94e-210	-33.4633	30.9552	37822	37753
AAGAAAAC	GTTTTCTT	0.000205729	0.000206427	0.000206078	-0.0275965	0.0274015	3.22e-34	2.5e-34	3.22e-34	-12.1978	12.2185	13348	13639	0.00286061	0.00270444	0.00278252	-0.416977	0.401258	0	0	0	-45.9879	44.7115	13570	13867	0.00123769	0.00105702	0.00114735	-0.183977	0.168041	1.74e-204	6.33e-175	6.33e-175	-30.5227	28.2047	14089	14458
AAGAAAAG	CTTTTCTT	7.33e-05	4.52e-05	5.93e-05	0.0116471	-0.00889847	3.28e-13	1.1e-08	1.1e-08	7.28256	-5.71514	18984	20040	0.00119981	0.001292	0.0012459	-0.189718	0.195371	1.77e-194	2.85e-209	1.77e-194	-29.7583	30.8819	19366	19433	0.000419954	0.000513715	0.000466834	-0.0760387	0.0833517	1.2e-70	5.27e-86	1.2e-70	-17.7722	19.6572	19919	19951
AAGAAAAT	ATTTTCTT	0.000188451	0.000165802	0.000177127	-0.0206627	0.0193855	1.74e-31	6.67e-28	6.67e-28	-11.6742	10.9501	21485	21399	0.000894777	0.000874947	0.000884862	-0.17893	0.177397	1.55e-145	2.36e-142	2.36e-142	-25.6947	25.4082	22536	22405	0.000548262	0.000602994	0.000575628	-0.093949	0.0987237	1.16e-91	1.27e-100	1.16e-91	-20.3078	21.2979	23425	23313
AAGAAACA	TGTTTCTT	7.46e-05	0.000116029	9.53e-05	-0.017195	0.0213269	2.08e-13	5.2e-20	2.08e-13	-7.34337	9.16002	12421	12584	0.000715342	0.000883222	0.000799282	-0.215418	0.237141	9.7e-117	1.11e-143	9.7e-117	-22.9723	25.5281	12675	12920	0.000451108	0.000592999	0.000522053	-0.115202	0.130897	9.45e-76	5.51e-99	9.45e-76	-18.4199	21.1205	13080	13310
AAGAAACC	GGTTTCTT	4.57e-06	6.07e-06	5.32e-06	-0.00652034	0.00740962	0.0689881	0.0361627	0.0689881	-1.8185	2.0951	5419	5546	0.000204201	0.000231729	0.000217965	-0.176835	0.186045	1.31e-34	4.83e-39	1.31e-34	-12.2706	13.0717	5486	5605	4.89e-05	4.62e-05	4.75e-05	-0.0586539	0.0562467	1.35e-09	3.81e-09	3.81e-09	-6.06097	5.89218	5585	5730
AAGAAACT	AGTTTCTT	0.000151575	0.000184646	0.00016811	-0.0266255	0.0296067	1.2e-25	6.95e-31	1.2e-25	-10.4697	11.5557	10730	10579	0.00392978	0.00379581	0.00386279	-0.553998	0.549378	0	0	0	-53.9301	52.9993	10692	10508	0.000979761	0.000999381	0.000989571	-0.185776	0.189482	2.78e-162	1.71e-165	2.78e-162	-27.1533	27.4241	11115	10888
AAGAAAGA	TCTTTCTT	0.000183472	0.000181697	0.000182584	0.00860862	-0.00856545	1.07e-30	2.03e-30	2.03e-30	11.5189	-11.4631	18261	18363	8.98e-05	0.000168099	0.000128957	-0.0246714	0.0346181	4.04e-16	8.72e-29	4.04e-16	-8.13743	11.133	18724	18788	8.3e-06	2.28e-05	1.56e-05	-0.00499097	0.0084596	0.0124917	3.44e-05	0.0124917	-2.49795	4.14247	19225	19268
AAGAAAGC	NA	3.52e-05	NA	3.52e-05	-0.0158627	NA	4.55e-07	NA	4.55e-07	-5.04436	NA	7023	NA	0.000148489	NA	0.000148489	-0.131816	NA	1.28e-25	NA	1.28e-25	-10.4634	NA	7136	NA	3.67e-05	NA	3.67e-05	-0.0443215	NA	1.52e-07	NA	1.52e-07	-5.25016	NA	7296	NA
AAGAAATA	TATTTCTT	0.000216472	0.000179437	0.000197955	-0.0254568	0.0231968	6.45e-36	4.63e-30	4.63e-30	-12.5123	11.3915	16285	16454	0.00210877	0.00198162	0.0020452	-0.317342	0.308321	0	6.09084128193089e-320	6.09084128193089e-320	-39.4699	38.259	16881	17073	0.0013284	0.00116281	0.00124561	-0.168384	0.157919	2.49e-219	3.1e-192	3.1e-192	-31.623	29.584	17653	17852
AAGAAATC	GATTTCTT	5.46e-05	0.000175352	0.000114951	-0.0191929	0.0318447	3.37e-10	2.05e-29	3.37e-10	-6.2806	11.2611	7440	8692	0.000410574	0.000478302	0.000444438	-0.213055	0.229067	8.35e-68	1.1e-78	8.35e-68	-17.4011	18.7822	7563	7606	0.000255931	0.000261521	0.000258726	-0.112963	0.113646	9.37e-44	1.13e-44	9.37e-44	-13.8729	14.0236	7856	7907
AAGAAATG	CATTTCTT	2.98e-05	1.67e-05	2.32e-05	-0.0106062	0.0079595	3.5e-06	0.000519789	0.000519789	-4.63887	3.47036	13221	13191	0.00127385	0.00129906	0.00128645	-0.281437	0.28525	2.32e-206	2.1e-210	2.32e-206	-30.664	30.9663	13356	13309	0.000255026	0.000297068	0.000276047	-0.084878	0.0918568	1.32e-43	1.67e-50	1.32e-43	-13.8483	14.9466	13773	13744
AAGAAATT	AATTTCTT	3.5e-05	4.74e-05	4.12e-05	-0.0118607	0.0137119	4.84e-07	4.79e-09	4.84e-07	-5.03253	5.85427	12303	12380	0.00029695	0.00034758	0.000322265	-0.137977	0.148808	1.54e-49	1.11e-57	1.54e-49	-14.7978	16.0101	12828	12846	0.000199785	0.00020688	0.000203332	-0.0758289	0.0768662	1.56e-34	1.06e-35	1.56e-34	-12.2567	12.4725	13362	13426
AAGAACAA	TTGTTCTT	0.000349201	0.00040659	0.000377895	-0.0420889	0.0447471	7.26e-57	6.52e-66	7.26e-57	-15.8928	17.1496	9862	10130	0.00357284	0.0037276	0.00365022	-0.548584	0.555203	0	0	0	-51.4134	52.5192	9855	10050	0.000967919	0.00100247	0.000985195	-0.191612	0.192921	2.41e-160	5.34e-166	2.41e-160	-26.9885	27.4665	10266	10484
AAGAACAC	GTGTTCTT	7.22e-05	4.49e-05	5.85e-05	-0.0274631	0.0217388	5.06e-13	1.2e-08	1.2e-08	-7.22382	5.69926	4801	4816	0.000316996	0.000261883	0.00028944	-0.233319	0.21351	9.18e-53	6.74e-44	6.74e-44	-15.2893	13.8964	4862	4848	0.000133024	9.48e-05	0.000113889	-0.102083	0.0866501	1.51e-23	3.17e-17	3.17e-17	-10.001	8.4405	4993	4991
AAGAACAG	CTGTTCTT	0.000112553	0.00012024	0.000116397	-0.0274193	0.0277104	1.86e-19	1.11e-20	1.86e-19	-9.02175	9.32479	7565	7851	0.000506801	0.000553978	0.000530389	-0.238333	0.243918	2.92e-83	7.76e-91	2.92e-83	-19.334	20.2143	7500	7780	0.000293957	0.000271946	0.000282952	-0.122558	0.115478	5.4e-50	2.2e-46	2.2e-46	-14.8681	14.3005	7705	7985
AAGAACCC	GGGTTCTT	1.18e-06	5.65e-06	3.41e-06	0.00433114	0.00942439	0.356338	0.0432843	0.356338	0.922365	2.02096	3150	3199	0.000245082	0.000227017	0.00023605	-0.2551	0.24405	3.42e-41	2.77e-38	2.77e-38	-13.4432	12.9381	3150	3193	2.53e-05	2.52e-05	2.52e-05	-0.0556918	0.055385	1.31e-05	1.36e-05	1.36e-05	-4.35811	4.35061	3192	3221
AAGAACTA	TAGTTCTT	0.00013323	0.000212763	0.000172996	-0.0356386	0.0445164	9.68e-23	2.49e-35	9.68e-23	-9.8156	12.4046	5260	5405	0.0012938	0.00153845	0.00141612	-0.455788	0.491644	1.46e-209	8.11e-249	1.46e-209	-30.9034	33.7029	5208	5319	0.000462861	0.000524595	0.000493728	-0.182586	0.192218	1.12e-77	8.72e-88	1.12e-77	-18.6584	19.8644	5439	5565
AAGAACTC	GAGTTCTT	3.4e-05	2.98e-05	3.19e-05	-0.0200459	0.0184808	7.22e-07	3.48e-06	3.48e-06	-4.95549	4.64018	4262	4403	0.000353414	0.000278852	0.000316133	-0.263116	0.230233	1.28e-58	1.25e-46	1.25e-46	-16.144	14.3397	4285	4422	8.29e-05	5.49e-05	6.89e-05	-0.0858891	0.0689336	2.86e-15	1.33e-10	1.33e-10	-7.89721	6.42351	4421	4550
AAGAAGAA	TTCTTCTT	3.23e-08	2.78e-07	1.55e-07	-0.000216278	0.00061022	0.878523	0.653643	0.878523	-0.152842	0.448707	14070	14233	0.00050217	0.000454281	0.000478225	-0.108658	0.102328	1.62e-82	7.95e-75	7.95e-75	-19.2454	18.3043	14259	14441	2.52e-06	1.86e-06	2.19e-06	-0.00535711	0.00424757	0.168468	0.237336	0.237336	-1.37715	1.18167	14726	14879
AAGAAGAC	GTCTTCTT	5.19e-05	5.86e-05	5.52e-05	-0.0195433	0.02047	9.15e-10	7.48e-11	9.15e-10	-6.12369	6.51085	6888	7035	0.00127158	0.00118034	0.00122596	-0.392746	0.376094	5.38e-206	2.35e-191	2.35e-191	-30.6366	29.5157	6951	6991	8.26e-05	3.18e-05	5.72e-05	-0.0676373	0.0415984	3.3e-15	1.02e-06	1.02e-06	-7.87899	4.888	7126	7199
AAGAAGCA	TGCTTCTT	8.76e-05	8.12e-05	8.44e-05	-0.0242713	0.0232633	1.75e-15	1.83e-14	1.83e-14	-7.95828	7.66221	7428	7557	0.000185876	0.000157384	0.00017163	-0.142968	0.130858	1.18e-31	4.68e-27	4.68e-27	-11.707	10.7723	7569	7709	2.84e-05	1.84e-05	2.34e-05	-0.0379468	0.0303938	3.79e-06	0.000195835	0.000195835	-4.6228	3.72435	7697	7838
AAGAAGTT	NA	1.32e-05	NA	1.32e-05	-0.00977517	NA	0.00196672	NA	0.00196672	-3.09522	NA	6958	NA	0.000300685	NA	0.000300685	-0.190896	NA	3.86e-50	NA	3.86e-50	-14.8906	NA	6911	NA	1.45e-05	NA	1.45e-05	-0.0282762	NA	0.00094643	NA	0.00094643	-3.306	NA	7134	NA
AAGAATAA	TTATTCTT	8.99e-05	4.7e-05	6.85e-05	-0.0205558	0.0147689	7.4e-16	5.54e-09	5.54e-09	-8.06386	5.83026	10601	10590	0.000465272	0.000453437	0.000459354	-0.185775	0.182911	1.36e-76	1.09e-74	1.09e-74	-18.5245	18.2873	11157	11080	0.000302295	0.000200082	0.000251188	-0.100318	0.0811381	2.32e-51	1.39e-34	1.39e-34	-15.0775	12.2658	11613	11596
AAGAATCA	TGATTCTT	0.000106964	9.73e-05	0.000102122	-0.026024	0.024787	1.44e-18	4.98e-17	4.98e-17	-8.79486	8.38727	7958	7950	0.00349731	0.00365487	0.00357609	-0.605555	0.61858	0	0	0	-50.8652	52.0024	8004	7997	0.00074454	0.000793893	0.000769216	-0.188036	0.194375	8.63e-124	7.23e-132	8.63e-124	-23.6676	24.4401	8286	8233
AAGAATCG	CGATTCTT	0.000170675	0.000154039	0.000162357	0.0863644	-0.08219	1.13e-28	4.86e-26	4.86e-26	11.1099	-10.5545	1143	1163	1.84e-05	7.16e-06	1.28e-05	-0.114212	0.0714185	0.000233709	0.0216227	0.0216227	-3.6795	2.29694	1172	1192	1.15e-05	2.52e-06	7.01e-06	0.0615272	-0.0288045	0.00328946	0.168639	0.168639	2.93932	-1.37659	1184	1209
AAGAATGT	ACATTCTT	8.02e-05	5.96e-05	6.99e-05	0.0223871	-0.0192114	2.64e-14	5.16e-11	5.16e-11	7.61491	-6.56638	8029	8142	0.00146756	0.00127385	0.00137071	0.391729	-0.36975	1.92e-237	2.32e-206	2.32e-206	32.9162	-30.664	7975	7813	0.00105852	0.000920147	0.000989334	0.223257	-0.210338	3.6e-175	1.58e-152	1.58e-152	28.2247	-26.3134	8298	8160
AAGAATTA	TAATTCTT	3.41e-06	5.59e-06	4.5e-06	-0.00475869	0.00603896	0.116194	0.0442937	0.116194	-1.57095	2.0113	7556	7609	0.000170408	0.000198814	0.000184611	-0.133778	0.143443	3.69e-29	9.69e-34	3.69e-29	-11.2092	12.1076	7956	7988	0.000145545	0.000107539	0.000126542	-0.0827572	0.0707523	1.31e-25	2.43e-19	2.43e-19	-10.4611	8.99197	8304	8319
AAGACAAA	TTTGTCTT	0.000281486	0.000243558	0.000262522	-0.0348157	0.0323043	3.49e-46	3.39e-40	3.39e-40	-14.2685	13.2722	11459	11455	0.00116528	0.00134668	0.00125598	-0.286332	0.308125	6.12e-189	4.79e-218	6.12e-189	-29.3265	31.5295	11686	11630	0.00069429	0.000868545	0.000781418	-0.148777	0.165988	1.45e-115	4.39e-144	1.45e-115	-22.8544	25.5643	12082	12074
AAGACAAC	GTTGTCTT	3.37e-05	2.39e-05	2.88e-05	-0.0211231	0.0177356	7.92e-07	3.21e-05	3.21e-05	-4.93746	4.15799	3833	3820	0.00024437	0.000267841	0.000256105	-0.232079	0.243245	4.45e-41	7.42e-45	4.45e-41	-13.4236	14.0536	3830	3803	7.97e-05	8.75e-05	8.36e-05	-0.0894851	0.0937604	9.81e-15	5.07e-16	9.81e-15	-7.74183	8.10987	3938	3915
AAGACAAG	CTTGTCTT	0.000183198	8.45e-05	0.00013386	-0.0375245	0.0252889	1.18e-30	5.38e-15	5.38e-15	-11.5103	7.81791	6531	6500	0.000784973	0.000754947	0.00076996	-0.315654	0.309656	6.48e-128	4.27e-123	4.27e-123	-24.0652	23.6001	6597	6536	0.000346972	0.00035576	0.000351366	-0.14183	0.142941	1.09e-58	3.97e-60	1.09e-58	-16.1537	16.357	6758	6680
AAGACAAT	ATTGTCTT	0.000133432	9.32e-05	0.000113333	-0.0326328	0.0271158	8.99e-23	2.2e-16	2.2e-16	-9.82305	8.21095	6342	6414	0.000802282	0.000716197	0.00075924	-0.323697	0.304459	1.08e-130	7.07e-117	7.07e-117	-24.3293	22.986	6466	6511	0.000244929	0.000217631	0.00023128	-0.119908	0.112841	5.99e-42	1.82e-37	1.82e-37	-13.5713	12.7925	6732	6749
AAGACACA	TGTGTCTT	0.000258587	0.000403102	0.000330844	-0.0368074	0.0455054	1.44e-42	2.31e-65	1.44e-42	-13.6756	17.0759	9489	9577	0.00419841	0.00456718	0.0043828	-0.609235	0.629723	0	0	0	-55.7505	58.1581	9348	9435	0.00200238	0.00199033	0.00199636	-0.283435	0.28023	0	0	0	-38.8381	38.7208	9648	9724
AAGACAGA	TCTGTCTT	0.000152645	0.000175458	0.000164052	-0.0274763	0.0298306	8.09e-26	1.98e-29	8.09e-26	-10.5066	11.2645	10029	9831	0.000420568	0.000350222	0.000385395	-0.187298	0.171491	2.07e-69	4.17e-58	4.17e-58	-17.6117	16.0709	9921	9893	0.000195057	0.000149677	0.000172367	-0.0863764	0.0759354	9.33e-34	2.73e-26	2.73e-26	-12.1108	10.6086	10123	10097
AAGACATA	TATGTCTT	0.000201031	0.000263952	0.000232492	-0.0399972	0.0452237	1.78e-33	2.04e-43	1.78e-33	-12.0577	13.8168	6291	6419	0.000510308	0.000583114	0.000546711	-0.257482	0.272386	7.98e-84	1.63e-95	7.98e-84	-19.4008	20.7394	6417	6536	0.000260452	0.00036251	0.000311481	-0.123221	0.14407	1.7e-44	3.11e-61	1.7e-44	-13.9949	16.5116	6685	6784
AAGACATT	AATGTCTT	2.94e-05	3.39e-05	3.17e-05	-0.013876	0.0149186	4.02e-06	7.27e-07	4.02e-06	-4.61037	4.95415	7683	7704	0.000689329	0.000539184	0.000614256	-0.270263	0.240935	1.45e-112	1.84e-88	1.84e-88	-22.5505	19.9424	7908	7817	0.000163007	7.72e-05	0.000120123	-0.0885202	0.061394	1.74e-28	2.53e-14	2.53e-14	-11.071	7.62053	8167	8073
AAGACCAA	TTGGTCTT	1.74e-06	1.38e-05	7.76e-06	-0.00404448	0.0113393	0.261694	0.00159839	0.261694	-1.1224	3.15621	5380	5412	0.000635306	0.000757643	0.000696475	-0.313277	0.341138	6.81e-104	1.58e-123	6.81e-104	-21.6482	23.6423	5441	5475	3.19e-05	3.33e-05	3.26e-05	-0.0475909	0.048547	9.73e-07	5.69e-07	9.73e-07	-4.8971	5.0016	5547	5563
AAGACCAG	CTGGTCTT	0.00191769	0.00201811	0.0019679	0.092852	-0.0951452	8.78e-304	1.3634235562635e-319	8.78e-304	37.273	-38.2383	11289	11337	0.000104255	8.6e-05	9.51e-05	-0.0867765	0.0788783	1.83e-18	1.67e-15	1.67e-15	-8.76725	7.9637	11710	11721	8.66e-05	0.00011539	0.000101008	0.0540135	-0.0623816	7.02e-16	1.23e-20	7.02e-16	8.07037	-9.31446	11762	11767
AAGACCAT	ATGGTCTT	8.11e-05	0.000100714	9.09e-05	0.0285874	-0.0314669	1.89e-14	1.42e-17	1.89e-14	7.65816	-8.53405	5066	5179	0.000587921	0.000523441	0.000555681	-0.31316	0.291204	2.75e-96	6.21e-86	6.21e-86	-20.8247	19.649	5097	5223	7.95e-05	8.67e-05	8.31e-05	-0.0780525	0.0801758	1.05e-14	6.8e-16	1.05e-14	-7.73291	8.07421	5200	5348
AAGACCCA	TGGGTCTT	4.02e-05	3.8e-05	3.91e-05	-0.0211756	0.0206254	6.93e-08	1.57e-07	1.57e-07	-5.39304	5.24446	4515	4491	0.00110964	0.00107201	0.00109082	-0.455807	0.45106	5.19e-180	5.66e-174	5.66e-174	-28.617	28.1271	4473	4402	0.000354738	0.000270476	0.000312607	-0.174991	0.153128	5.84e-60	3.84e-46	3.84e-46	-16.3335	14.2617	4546	4517
AAGACCCT	AGGGTCTT	0.000254702	0.000254045	0.000254374	0.048258	-0.0478302	5.9e-42	7.49e-42	7.49e-42	13.5725	-13.555	5509	5596	7.31e-05	9.01e-05	8.16e-05	-0.10375	0.114503	2.14e-13	3.66e-16	2.14e-13	-7.33979	8.14951	5697	5765	6.01e-05	6.3e-05	6.15e-05	-0.064182	0.0654051	1.79e-11	5.99e-12	1.79e-11	-6.7223	6.87994	5736	5787
AAGACCTA	TAGGTCTT	4.51e-05	6.82e-05	5.66e-05	-0.0264811	0.0325819	1.11e-08	2.22e-12	1.11e-08	-5.71318	7.02011	3253	3217	0.000464967	0.000420611	0.000442789	-0.342533	0.328941	1.53e-76	2.04e-69	2.04e-69	-18.5184	17.6126	3340	3263	0.000163053	8.14e-05	0.000122206	-0.13698	0.0972895	1.71e-28	5.24e-15	5.24e-15	-11.0726	7.82118	3429	3373
AAGACTCC	GGAGTCTT	0.00073159	0.00069705	0.00071432	0.0798421	-0.0773905	4.26e-117	1.17e-111	1.17e-111	23.0081	-22.458	5808	5888	0.000139753	0.00014597	0.000142861	-0.14013	0.142327	3.3e-24	3.26e-25	3.3e-24	-10.1509	10.3742	5994	6085	5.6e-08	4.55e-07	2.56e-07	0.00190984	0.00541771	0.83746	0.558446	0.83746	0.205143	0.585152	6052	6132
AAGACTCT	AGAGTCTT	0.000396277	0.000361446	0.000378862	0.0572428	-0.053939	2.75e-64	8.52e-59	8.52e-59	16.9306	-16.1692	6176	6324	3.07e-05	3.66e-05	3.37e-05	-0.0639838	0.0688987	1.94e-06	2.06e-07	1.94e-06	-4.75996	5.19388	6391	6545	3.06e-08	9.36e-07	4.83e-07	0.00137509	-0.00750093	0.879356	0.401646	0.879356	0.151786	-0.838686	6457	6614
AAGACTTA	TAAGTCTT	0.000187789	0.000158854	0.000173322	-0.0442524	0.0404685	2.21e-31	8.4e-27	8.4e-27	-11.6537	10.7182	4799	4849	0.00256863	0.00205755	0.00231309	-0.667164	0.594907	0	0	0	-43.5714	38.9866	4819	4860	0.000457674	0.00028918	0.000373427	-0.188966	0.1494	7.94e-77	3.28e-49	3.28e-49	-18.5535	14.7467	5007	5062
AAGAGAAA	TTTCTCTT	0.000209518	0.000259497	0.000234507	-0.0229817	0.0255518	8.11e-35	1.03e-42	8.11e-35	-12.3096	13.6997	18570	18529	0.00134022	0.00150542	0.00142282	-0.236084	0.249158	5.21e-217	1.61e-243	5.21e-217	-31.4537	33.3387	18675	18786	0.000907365	0.000932858	0.000920111	-0.13078	0.132178	1.95e-150	1.31e-154	1.95e-150	-26.1299	26.4947	19293	19385
AAGAGAAC	GTTCTCTT	5.37e-05	6.08e-05	5.72e-05	-0.0230684	0.0242703	4.59e-10	3.38e-11	4.59e-10	-6.23254	6.62929	5113	5181	0.000217399	0.000161234	0.000189317	-0.188018	0.160544	9.81e-37	1.12e-27	1.12e-27	-12.661	10.9032	5180	5239	4.73e-05	2.26e-05	3.49e-05	-0.0592114	0.0407538	2.51e-09	3.76e-05	3.76e-05	-5.96078	4.12154	5321	5333
AAGAGAAG	NA	7.49e-05	NA	7.49e-05	-0.0173857	NA	1.88e-13	NA	1.88e-13	-7.35722	NA	10612	NA	0.000116007	NA	0.000116007	-0.0875641	NA	2.29e-20	NA	2.29e-20	-9.24827	NA	10707	NA	1.04e-06	NA	1.04e-06	-0.00559258	NA	0.377665	NA	0.377665	-0.882207	NA	10885	NA
AAGAGAAT	ATTCTCTT	1.51e-05	1.92e-05	1.71e-05	-0.00881608	0.00988173	0.000959465	0.000195955	0.000959465	-3.30216	3.72419	9779	9841	0.00105269	0.00110745	0.00108007	-0.297118	0.302484	7.13e-171	1.16e-179	7.13e-171	-27.8721	28.5887	10017	10085	0.000388765	0.000332222	0.000360494	-0.122232	0.112125	1.55e-65	2.87e-56	2.87e-56	-17.0993	15.8065	10239	10310
AAGAGACA	TGTCTCTT	0.000273194	0.000214287	0.000243741	-0.0404622	0.0358637	7.11e-45	1.43e-35	1.43e-35	-14.0567	12.4489	8221	8195	0.00102812	0.00107486	0.00105149	-0.319749	0.326949	6.24e-167	1.97e-174	6.24e-167	-27.5446	28.1645	8270	8245	0.000291041	0.000348597	0.000319819	-0.114876	0.125819	1.62e-49	5.93e-59	1.62e-49	-14.7941	16.1915	8495	8466
AAGAGAGA	TCTCTCTT	6.43e-05	7.36e-05	6.9e-05	-0.0143322	0.0154388	9.12e-12	2.99e-13	9.12e-12	-6.81991	7.29515	13325	13359	0.000682429	0.000715091	0.00069876	-0.188986	0.195871	1.86e-111	1.06e-116	1.86e-111	-22.4372	22.9683	13473	13449	0.000376953	0.000433613	0.000405283	-0.0951314	0.103391	1.33e-63	6.94e-73	1.33e-63	-16.8374	18.059	13749	13713
AAGAGCAA	TTGCTCTT	4.02e-06	2.33e-07	2.13e-06	0.00493839	-0.00119214	0.0883091	0.681647	0.681647	1.70439	-0.410217	8311	8211	0.00144546	0.001476	0.00146073	-0.383118	0.38745	6.77e-234	8.51e-239	6.77e-234	-32.667	33.0108	8275	8228	0.000519446	0.000524252	0.000521849	-0.155438	0.156177	6.08e-87	9.92e-88	6.08e-87	-19.7666	19.8579	8464	8425
AAGAGCGA	TCGCTCTT	0.000456696	0.00036649	0.000411593	0.112464	-0.100774	8.29e-74	1.37e-59	1.37e-59	18.1761	-16.2816	1824	1832	3.44e-05	1.7e-05	2.57e-05	-0.125007	0.0884294	4.74e-07	0.000397299	0.000397299	-5.03654	3.54189	1856	1840	2.86e-06	3.09e-06	2.97e-06	0.024772	-0.0258789	0.142332	0.127695	0.142332	1.46716	-1.52325	1845	1825
AAGAGCTA	TAGCTCTT	0.000216638	0.000177046	0.000196842	-0.0487318	0.04418	6.08e-36	1.11e-29	1.11e-29	-12.5171	11.3154	4630	4582	0.001483	0.00143491	0.00145896	-0.520324	0.512026	6.39e-240	3.34e-232	3.34e-232	-33.0892	32.5474	4627	4605	0.000422832	0.000471256	0.000447044	-0.187594	0.19802	4.05e-71	4.74e-79	4.05e-71	-17.833	18.8269	4756	4733
AAGAGGAA	TTCCTCTT	0.000126097	0.000115282	0.00012069	-0.0224759	0.0214707	1.31e-21	6.84e-20	6.84e-20	-9.54921	9.13048	11376	11446	0.000390785	0.000326323	0.000358554	-0.161408	0.147131	1.26e-64	2.9e-54	2.9e-54	-16.9764	15.5127	11349	11489	2.41e-05	3.18e-05	2.8e-05	-0.0272474	0.0311644	2.04e-05	9.96e-07	2.04e-05	-4.26092	4.89246	11552	11692
AAGAGTCA	TGACTCTT	7.98e-06	9.19e-06	8.59e-06	-0.00905114	0.00974345	0.0162683	0.00992564	0.0162683	-2.40285	2.57842	4941	4913	0.00037307	0.000418209	0.000395639	-0.251851	0.267527	8.88e-62	4.95e-69	8.88e-62	-16.587	17.5622	4960	4940	0.000150171	0.000215515	0.000182843	-0.108342	0.129792	2.26e-26	4.05e-37	2.26e-26	-10.6261	12.7302	5055	5065
AAGAGTGA	TCACTCTT	0.00011262	0.000109403	0.000111012	0.0283342	-0.0278661	1.81e-19	5.88e-19	5.88e-19	9.02445	-8.89461	7022	7071	4.88e-07	5.32e-06	2.9e-06	-0.00754016	0.0249944	0.548475	0.0476337	0.548475	-0.600047	1.98063	7188	7130	5.61e-06	1.17e-09	2.81e-06	0.0174095	0.000252789	0.0400273	0.976312	0.976312	2.05347	0.0296929	7254	7212
AAGAGTTC	NA	6.61e-05	NA	6.61e-05	0.0270726	NA	4.79e-12	NA	4.79e-12	6.9119	NA	4565	NA	2.61e-06	NA	2.61e-06	-0.0217249	NA	0.165451	NA	0.165451	-1.38697	NA	4662	NA	5.58e-06	NA	5.58e-06	0.021517	NA	0.0405821	NA	0.0405821	2.04778	NA	4760	NA
AAGATAAA	TTTATCTT	0.000101202	5.99e-05	8.06e-05	-0.021628	0.0166451	1.18e-17	4.63e-11	4.63e-11	-8.55471	6.58252	10528	10578	0.000380395	0.000438687	0.000409541	-0.167137	0.179917	5.9e-63	2.54e-72	5.9e-63	-16.7491	17.9873	11137	11072	0.000285402	0.00034194	0.000313671	-0.0969322	0.106143	1.37e-48	7.31e-58	1.37e-48	-14.6501	16.0361	11591	11579
AAGATAAC	NA	1.18e-05	NA	1.18e-05	-0.0128273	NA	0.00350909	NA	0.00350909	-2.91923	NA	3615	NA	0.000195029	NA	0.000195029	-0.21037	NA	3.95e-33	NA	3.95e-33	-11.9918	NA	3700	NA	5.84e-05	NA	5.84e-05	-0.0773352	NA	3.47e-11	NA	3.47e-11	-6.62527	NA	3842	NA
AAGATACA	TGTATCTT	2.47e-05	2.84e-05	2.66e-05	-0.0146288	0.0155025	2.36e-05	5.84e-06	2.36e-05	-4.22808	4.5322	5797	5941	0.000384876	0.000343143	0.000364009	-0.23098	0.21665	1.12e-63	5.74e-57	5.74e-57	-16.8475	15.9076	6012	6122	0.000231643	0.000281119	0.000256381	-0.120451	0.131872	9.1e-40	6.89e-48	9.1e-40	-13.198	14.5397	6243	6344
AAGATCAA	TTGATCTT	0.000117677	6.1e-05	8.93e-05	-0.0313675	0.0224191	2.85e-20	3.13e-11	3.13e-11	-9.22483	6.64061	5967	5971	0.00197552	0.00170103	0.00183828	-0.526648	0.485215	5.81594315658482e-319	6.58e-275	6.58e-275	-38.1999	35.442	5922	5957	0.000417946	0.000442193	0.000430069	-0.162609	0.166517	2.56e-70	2.73e-74	2.56e-70	-17.7297	18.2369	6146	6180
AAGATCAC	GTGATCTT	0.000120962	0.000166682	0.000143822	0.0333099	-0.0399288	8.56e-21	4.84e-28	8.56e-21	9.35275	-10.9791	5334	5157	0.000196422	9.39e-05	0.000145137	-0.171895	0.122065	2.36e-33	8.94e-17	8.94e-17	-12.0346	8.31827	5468	5248	4.84e-05	2.67e-05	3.75e-05	-0.0578452	0.0437881	1.62e-09	7.6e-06	7.6e-06	-6.0321	4.47614	5552	5348
AAGATCCA	TGGATCTT	2.08e-05	1.36e-05	1.72e-05	-0.0170879	0.0134811	0.000103638	0.00173543	0.00173543	-3.88193	3.13214	3626	3768	0.000410797	0.000374717	0.000392757	-0.311603	0.291599	7.69e-68	4.83e-62	4.83e-62	-17.4059	16.6236	3579	3703	0.000225284	0.000290089	0.000257686	-0.156004	0.173092	1.01e-38	2.33e-49	1.01e-38	-13.0156	14.7699	3669	3816
AAGATCGC	GCGATCTT	0.000645371	0.000648597	0.000646984	0.141898	-0.140838	1.6e-103	4.96e-104	1.6e-103	21.6089	-21.6629	1634	1623	1.67e-05	4.39e-06	1.06e-05	-0.090892	0.046708	0.000448292	0.0719377	0.0719377	-3.50991	1.79951	1718	1701	8.99e-07	1.8e-05	9.43e-06	0.0143964	-0.0645797	0.411103	0.000238393	0.411103	0.821955	-3.67443	1725	1704
AAGATCGT	ACGATCTT	0.000382141	0.000322521	0.000352331	0.121452	-0.115891	4.65e-62	1.17e-52	1.17e-52	16.6258	-15.2734	1319	1219	3.73e-06	3e-06	3.37e-06	-0.0481384	0.0447274	0.097053	0.137025	0.137025	-1.65931	1.48696	1367	1268	1.33e-05	9.34e-06	1.13e-05	0.0621231	-0.0539177	0.00153664	0.00804831	0.00804831	3.16769	-2.65004	1374	1273
AAGATTAA	TTAATCTT	9.72e-06	2.23e-05	1.6e-05	-0.00876178	0.0133112	0.00802375	5.93e-05	0.00802375	-2.65108	4.01551	6311	6314	0.000263328	0.000199661	0.000231495	-0.181341	0.157903	3.95e-44	7.08e-34	7.08e-34	-13.9347	12.1334	6629	6631	0.000147921	0.000126702	0.000137311	-0.0911193	0.0840979	5.31e-26	1.67e-22	1.67e-22	-10.5462	9.76042	6905	6944
AAGATTGC	GCAATCTT	0.000299469	0.000357769	0.000328619	0.0623019	-0.0683035	5.07e-49	3.24e-58	5.07e-49	14.7173	-16.0867	3904	3888	1.23e-07	2.23e-07	1.73e-07	0.00507514	0.00686576	0.763594	0.684937	0.763594	0.300765	0.405736	4020	3999	3.08e-05	1.46e-05	2.27e-05	0.0545215	-0.0376975	1.52e-06	0.000917812	0.000917812	4.80892	-3.31459	4091	4064
AAGATTGT	ACAATCTT	0.000153785	0.000155648	0.000154716	0.0416492	-0.0425793	5.34e-26	2.71e-26	5.34e-26	10.5458	-10.6095	4483	4323	2.26e-05	2.23e-05	2.24e-05	0.0644721	-0.0647279	4.46e-05	5.09e-05	5.09e-05	4.08226	-4.05142	4582	4457	5.75e-05	8.38e-05	7.06e-05	0.0693988	-0.0846955	4.92e-11	2.06e-15	4.92e-11	6.57355	-7.9381	4712	4590
AAGCAAAA	TTTTGCTT	0.000513659	0.000401416	0.000457537	-0.0452447	0.0397687	8.81e-83	4.26e-65	4.26e-65	-19.2769	17.0401	12326	12443	0.00250422	0.00226045	0.00238233	-0.404402	0.383452	0	0	0	-43.0203	40.8678	12511	12578	0.00127635	0.00127981	0.00127808	-0.193693	0.193376	8.19e-211	2.22e-211	8.19e-211	-30.9964	31.0385	13025	13098
AAGCAAAC	GTTTGCTT	0.000135192	0.00014422	0.000139706	-0.0353422	0.0365265	4.73e-23	1.75e-24	4.73e-23	-9.88766	10.2125	5432	5443	0.000542966	0.000548626	0.000545796	-0.286522	0.289313	4.55e-89	5.61e-90	4.55e-89	-20.0123	20.1164	5528	5501	0.000355063	0.000278258	0.000316661	-0.156403	0.139161	5.16e-60	2.03e-47	2.03e-47	-16.341	14.4655	5681	5646
AAGCAAAG	CTTTGCTT	0.000185065	0.000164947	0.000175006	-0.0346699	0.0330422	5.96e-31	9.11e-28	9.11e-28	-11.5688	10.9218	7375	7459	0.000207837	0.000207708	0.000207772	-0.148742	0.150719	3.41e-35	3.57e-35	3.57e-35	-12.3794	12.3755	7501	7534	8.42e-05	5.75e-05	7.09e-05	-0.0641519	0.0538236	1.78e-15	4.8e-11	4.8e-11	-7.95566	6.57707	7656	7673
AAGCAAAT	ATTTGCTT	0.000270784	0.000205183	0.000237984	-0.0392103	0.0341921	1.71e-44	3.93e-34	3.93e-34	-13.9945	12.1816	8808	8863	0.00234219	0.00217119	0.00225669	-0.469261	0.451739	0	0	0	-41.6018	40.051	8866	8941	0.0012342	0.000901115	0.00106766	-0.228533	0.195379	6.46e-204	2.05e-149	2.05e-149	-30.4797	26.0396	9229	9294
AAGCAACA	TGTTGCTT	8.34e-05	8.69e-05	8.52e-05	-0.0284985	0.0287514	8.02e-15	2.22e-15	8.02e-15	-7.76739	7.92852	5175	5304	0.000246342	0.00036264	0.000304491	-0.197623	0.239096	2.14e-41	4.21e-60	2.14e-41	-13.4777	16.3534	5301	5329	0.00016043	0.000247302	0.000203866	-0.107872	0.133027	4.63e-28	2.44e-42	4.63e-28	-10.9832	13.6369	5421	5506
AAGCAACC	GGTTGCTT	6.68e-05	6.02e-05	6.35e-05	-0.0338453	0.032536	3.63e-12	4.2e-11	4.2e-11	-6.95111	6.59682	2940	2902	0.000259911	0.000282669	0.00027129	-0.270439	0.287175	1.4e-43	3.05e-47	1.4e-43	-13.844	14.4375	2984	2908	0.000107222	0.000108939	0.00010808	-0.118105	0.12123	2.75e-19	1.43e-19	2.75e-19	-8.97873	9.05031	3027	2949
AAGCAACT	AGTTGCTT	0.000193816	0.000126013	0.000159915	-0.0451158	0.0362853	2.46e-32	1.35e-21	1.35e-21	-11.8393	9.54605	4864	4857	0.000681442	0.000637168	0.000659305	-0.343384	0.330972	2.68e-111	3.42e-104	3.42e-104	-22.421	21.6799	4911	4917	0.000350208	0.000319493	0.00033485	-0.166851	0.159127	3.23e-59	3.5e-54	3.5e-54	-16.2289	15.5006	5008	4991
AAGCAAGA	TCTTGCTT	5.04e-05	6.82e-05	5.93e-05	-0.0184271	0.0211037	1.6e-09	2.21e-12	1.6e-09	-6.03431	7.02054	7377	7602	0.00107034	0.00125346	0.0011619	-0.346843	0.371907	1.05e-173	4.34e-203	1.05e-173	-28.1052	30.4173	7376	7500	0.000436891	0.000599091	0.000517991	-0.149822	0.173179	2.02e-73	5.54e-100	2.02e-73	-18.1272	21.2288	7547	7739
AAGCAATA	TATTGCTT	0.000173882	0.000102346	0.000138114	-0.0422519	0.0322977	3.51e-29	7.79e-18	7.79e-18	-11.2138	8.60292	4886	4935	0.000272094	0.000274927	0.000273511	-0.21164	0.212596	1.53e-45	5.37e-46	1.53e-45	-14.1648	14.2384	5087	5088	0.000162781	0.000167051	0.000164916	-0.109918	0.111004	1.9e-28	3.77e-29	1.9e-28	-11.0634	11.2075	5281	5312
AAGCAATC	GATTGCTT	0.00088373	0.00102506	0.000954394	-0.0772421	0.0824272	4.81e-141	2.75e-163	4.81e-141	-25.2895	27.2386	7109	7221	0.000269084	0.000283575	0.000276329	-0.171257	0.174392	4.68e-45	2.18e-47	4.68e-45	-14.0862	14.4607	7343	7408	3.81e-05	4.25e-05	4.03e-05	-0.0437365	0.0458631	8.59e-08	1.57e-08	8.59e-08	-5.3544	5.654	7468	7529
AAGCAATG	CATTGCTT	0.000168623	0.000140756	0.00015469	-0.0366165	0.0333804	2.39e-28	6.2e-24	6.2e-24	-11.0429	10.0891	6180	6216	0.00400051	0.00377621	0.00388836	-0.731988	0.724582	0	0	0	-54.4153	52.8618	6115	5867	0.00064366	0.000689907	0.000666783	-0.197479	0.207732	2.8e-107	7.55e-115	2.8e-107	-22.0048	22.7821	6337	6101
AAGCAATT	AATTGCTT	0.00203079	0.00160396	0.00181737	-0.0925083	0.0821812	1.37350249543867e-321	2.13e-254	2.13e-254	-38.3585	34.0827	12000	12087	2.33e-06	6.78e-06	4.56e-06	-0.0125442	0.0214002	0.189673	0.025362	0.189673	-1.31155	2.23585	12495	12553	0.000146723	0.000136279	0.000141501	-0.067499	0.0650134	8.37e-26	4.4e-24	4.4e-24	-10.5034	10.1226	12707	12803
AAGCACAA	NA	0.000179641	NA	0.000179641	-0.0423943	NA	4.3e-30	NA	4.3e-30	-11.398	NA	5013	NA	0.000301588	NA	0.000301588	-0.221818	NA	2.76e-50	NA	2.76e-50	-14.913	NA	5114	NA	0.000212034	NA	0.000212034	-0.125633	NA	1.51e-36	NA	1.51e-36	-12.6269	NA	5254	NA
AAGCACAT	ATGTGCTT	0.000302408	0.00017792	0.000240164	-0.0554959	0.0421748	1.74e-49	8.06e-30	8.06e-30	-14.7894	11.3433	4940	5028	0.000201518	0.000237312	0.000219415	-0.18259	0.196104	3.55e-34	6.09e-40	3.55e-34	-12.1897	13.2283	5065	5173	0.000185545	0.000207075	0.00019631	-0.118225	0.123919	3.42e-32	9.88e-36	3.42e-32	-11.8117	12.4784	5208	5298
AAGCACTA	TAGTGCTT	6.19e-05	0.000154969	0.000108459	-0.0316837	0.0503904	2.19e-11	3.47e-26	2.19e-11	-6.69299	10.5863	3113	3088	0.000976238	0.000828504	0.000902371	-0.511841	0.472863	1.32e-158	6.69e-135	6.69e-135	-26.84	24.7241	3128	3123	0.000479996	0.000385781	0.000432888	-0.242018	0.217402	1.75e-80	4.77e-65	4.77e-65	-19.0008	17.0335	3224	3224
AAGCACTC	GAGTGCTT	8.23e-05	5.29e-05	6.76e-05	-0.0361474	0.029184	1.2e-14	6.32e-10	6.32e-10	-7.71644	6.18226	3137	3149	0.000346184	0.000426994	0.000386589	-0.300977	0.340543	1.86e-57	1.92e-70	1.86e-57	-15.9779	17.7458	3121	3108	0.000307033	0.000292695	0.000299864	-0.190947	0.19068	3.87e-52	8.7e-50	8.7e-50	-15.1953	14.8361	3202	3184
AAGCAGAA	TTCTGCTT	0.000186525	0.000139964	0.000163245	-0.0315462	0.0271425	3.5e-31	8.27e-24	8.27e-24	-11.6144	10.0607	9269	9362	0.000305796	0.000344152	0.000324974	-0.164086	0.172881	5.81e-51	3.95e-57	5.81e-51	-15.0167	15.931	9366	9498	0.000134341	0.000147675	0.000141008	-0.07358	0.0763557	9.18e-24	5.83e-26	9.18e-24	-10.0504	10.5374	9584	9748
AAGCAGAC	GTCTGCTT	7.78e-05	7.73e-05	7.76e-05	-0.0327829	0.0318023	6.38e-14	7.56e-14	7.56e-14	-7.50009	7.47799	3675	3829	0.000358361	0.000487299	0.00042283	-0.286346	0.325998	2.05e-59	3.95e-80	2.05e-59	-16.2566	18.9582	3696	3824	0.000213444	0.000222472	0.000217958	-0.149479	0.149333	8.88e-37	2.92e-38	8.88e-37	-12.6689	12.9341	3785	3899
AAGCATCA	TGATGCTT	6.22e-05	7.85e-05	7.04e-05	-0.0272187	0.0303161	1.97e-11	4.95e-14	1.97e-11	-6.70861	7.53346	4248	4257	0.000203579	0.000222349	0.000212964	-0.200499	0.212174	1.65e-34	1.56e-37	1.65e-34	-12.2519	12.8044	4259	4107	0.000105681	0.000119946	0.000112813	-0.0976822	0.105344	4.94e-19	2.17e-21	4.94e-19	-8.91394	9.4966	4362	4213
AAGCATCT	NA	4.43e-05	NA	4.43e-05	-0.0221711	NA	1.52e-08	NA	1.52e-08	-5.65932	NA	4546	NA	4.3e-05	NA	4.3e-05	-0.0884999	NA	1.77e-08	NA	1.77e-08	-5.63304	NA	4613	NA	2.14e-06	NA	2.14e-06	-0.0133526	NA	0.204877	NA	0.204877	-1.26778	NA	4714	NA
AAGCATTC	GAATGCTT	0.00023969	0.000306232	0.000272961	-0.0393454	0.0473098	1.39e-39	4.35e-50	1.39e-39	-13.1663	14.8826	7132	6452	0.00113842	0.00108033	0.00110937	-0.399598	0.378575	1.25e-184	2.62e-175	2.62e-175	-28.9862	28.2361	5783	6096	0.000900682	0.000740249	0.000820466	-0.241063	0.212897	2.42e-149	4.35e-123	4.35e-123	-26.0334	23.5993	5895	6186
AAGCCAAA	TTTGGCTT	0.00023379	0.000231133	0.000232462	-0.0385882	0.0378344	1.18e-38	3.11e-38	3.11e-38	-13.0032	12.9291	7887	8122	0.00445824	0.00384934	0.00415379	-0.685592	0.630146	0	0	0	-57.4572	53.3731	7931	8126	0.000875781	0.000708756	0.000792268	-0.20478	0.182428	2.87e-145	6.2e-118	6.2e-118	-25.6707	23.0915	8185	8357
AAGCCACA	TGTGGCTT	2.58e-05	2.59e-05	2.59e-05	-0.0146785	0.0145101	1.54e-05	1.51e-05	1.54e-05	-4.32281	4.32691	5906	6101	0.000290336	0.000396777	0.000343557	-0.199483	0.230449	1.78e-48	1.38e-65	1.78e-48	-14.6321	17.1061	5990	6179	0.000104005	9.85e-05	0.000101259	-0.0810744	0.0780181	9.34e-19	7.56e-18	7.56e-18	-8.84297	8.60634	6089	6273
AAGCCACC	GGTGGCTT	8.68e-05	6.87e-05	7.77e-05	-0.0302858	0.0276355	2.36e-15	1.8e-12	1.8e-12	-7.92111	7.04958	4756	4555	0.000142346	0.000122825	0.000132586	-0.156399	0.148923	1.26e-24	1.8e-21	1.8e-21	-10.2446	9.51617	4879	4674	2.56e-05	1.27e-05	1.92e-05	-0.0452878	0.0327689	1.14e-05	0.00197608	0.00197608	-4.38929	3.09381	4910	4687
AAGCCAGA	TCTGGCTT	5.63e-05	5.66e-05	5.65e-05	-0.020394	0.0202642	1.74e-10	1.59e-10	1.74e-10	-6.38286	6.39685	6821	6872	0.000947833	0.000962234	0.000955033	-0.339221	0.340546	4.76e-154	2.33e-156	4.76e-154	-26.4463	26.6466	6857	6891	0.000241722	0.000261539	0.000251631	-0.116149	0.120723	2.01e-41	1.12e-44	2.01e-41	-13.4822	14.0241	6991	6984
AAGCCCAG	CTGGGCTT	6.84e-08	1.33e-07	1.01e-07	0.000715013	0.000985803	0.823998	0.756541	0.823998	0.222406	0.310026	6739	6910	0.000246702	0.000218742	0.000232722	-0.17362	0.161953	1.87e-41	5.96e-37	5.96e-37	-13.4875	12.7001	6868	7013	6.02e-05	5.28e-05	5.65e-05	-0.0584792	0.0543363	1.7e-11	3.01e-10	3.01e-10	-6.72994	6.29839	6922	7039
AAGCCCAT	ATGGGCTT	6.64e-06	7.56e-06	7.1e-06	-0.00949176	0.010179	0.0284423	0.0193538	0.0284423	-2.19114	2.33865	3746	3699	0.000633079	0.000524538	0.000578808	-0.377787	0.344418	1.55e-103	4.14e-86	4.14e-86	-21.6102	19.6696	3755	3732	0.000163623	0.000144869	0.000154246	-0.130521	0.123275	1.38e-28	1.69e-25	1.69e-25	-11.0919	10.4368	3809	3769
AAGCGATC	GATCGCTT	0.000387995	0.000429124	0.00040856	-0.095499	0.0998432	5.56e-63	1.83e-69	5.56e-63	-16.7527	17.6186	2067	2120	1.34e-06	4.12e-07	8.77e-07	0.0225011	-0.0123855	0.319729	0.581762	0.581762	0.995017	-0.550813	2151	2201	2.93e-05	2.34e-05	2.63e-05	0.0718664	-0.0638338	2.71e-06	2.75e-05	2.75e-05	4.69137	-4.19345	2156	2206
AAGCGATT	AATCGCTT	0.0033025	0.00343452	0.00336851	-0.154235	0.158468	0	0	0	-48.9472	49.9192	7067	6984	2.21e-05	4.55e-05	3.38e-05	0.0505811	-0.0729757	5.39e-05	7.09e-09	5.39e-05	4.03815	-5.78895	7335	7264	0.000131839	0.000105399	0.000118619	-0.0844298	0.0759739	2.37e-23	5.49e-19	5.49e-19	-9.95635	8.90206	7349	7278
AAGCGGAG	CTCCGCTT	9.16e-05	7.49e-05	8.33e-05	0.0697067	-0.0605329	3.96e-16	1.85e-13	1.85e-13	8.14009	-7.35937	961	1033	7.57e-08	1.13e-05	5.67e-06	-0.00816423	0.0948678	0.813249	0.00395183	0.813249	-0.236237	2.88199	964	1057	2.12e-05	3.2e-05	2.66e-05	0.0940311	-0.109983	6.5e-05	9.37e-07	6.5e-05	3.99392	-4.90456	954	1046
AAGCGTGA	NA	9.3e-05	NA	9.3e-05	-0.0726318	NA	2.4e-16	NA	2.4e-16	-8.20017	NA	901	NA	2.89e-07	NA	2.89e-07	-0.0163206	NA	0.64416	NA	0.64416	-0.46189	NA	925	NA	7.87e-06	NA	7.87e-06	-0.0583987	NA	0.0150131	NA	0.0150131	-2.43207	NA	920	NA
AAGCTAAA	NA	0.000154848	NA	0.000154848	-0.0375853	NA	3.62e-26	NA	3.62e-26	-10.5822	NA	5455	NA	0.00013355	NA	0.00013355	-0.144627	NA	3.32e-23	NA	3.32e-23	-9.92303	NA	5308	NA	1.91e-05	NA	1.91e-05	-0.036805	NA	0.000149377	NA	0.000149377	-3.79212	NA	5485	NA
AAGCTCCA	TGGAGCTT	0.00019396	0.000166686	0.000180323	-0.0444413	0.0417276	2.34e-32	4.83e-28	4.83e-28	-11.8437	10.9793	4964	4845	5.79e-05	4.73e-05	5.26e-05	-0.0980364	0.089702	6.48e-11	3.5e-09	3.5e-09	-6.53239	5.90626	5064	4962	5.78e-05	6.85e-05	6.31e-05	-0.0667089	0.0736686	4.33e-11	7.23e-13	4.33e-11	-6.59239	7.1752	5117	4987
AAGCTCCG	CGGAGCTT	0.00176793	0.00169789	0.00173291	-0.176194	0.174309	3.3e-280	3.5e-269	3.5e-269	-35.7853	35.068	2905	2835	1.05e-05	4.21e-06	7.36e-06	0.0538038	-0.034329	0.0053925	0.0780255	0.0780255	2.78261	-1.76226	3081	3020	0.000161164	0.000130974	0.000146069	-0.144895	0.131281	3.5e-28	3.3e-23	3.3e-23	-11.0083	9.92363	3053	3007
AAGCTCTG	CAGAGCTT	8.58e-05	8.23e-05	8.4e-05	-0.0272755	0.0265729	3.43e-15	1.21e-14	1.21e-14	-7.87452	7.71527	5839	5891	1.87e-06	2.11e-07	1.04e-06	0.0162311	-0.00541722	0.240186	0.693121	0.693121	1.17452	-0.394623	5993	6048	3.8e-06	6.06e-06	4.93e-06	-0.0157564	0.0197883	0.0909793	0.0327791	0.0909793	-1.69026	2.13478	6050	6093
AAGCTGAA	TTCAGCTT	0.00011768	0.00010787	0.000112775	-0.0298911	0.0283165	2.84e-20	1.03e-18	1.03e-18	-9.22498	8.83204	6651	6745	0.00140685	0.00111996	0.0012634	-0.419919	0.371778	1.06e-227	1.15e-181	1.15e-181	-32.2271	28.7499	6708	6758	0.000205274	8.2e-05	0.000143649	-0.108292	0.0680452	1.95e-35	4.06e-15	4.06e-15	-12.424	7.85307	6892	6923
AAGCTGGA	TCCAGCTT	0.000646304	0.000632721	0.000639513	-0.0630858	0.0625314	1.14e-103	1.57e-101	1.57e-101	-21.6245	21.3959	8272	8267	0.0024025	0.00195263	0.00217756	-0.496051	0.447583	0	2.74745354319588e-315	2.74745354319588e-315	-42.1353	37.9775	8282	8296	0.000152778	8.33e-05	0.000118024	-0.0849758	0.0626638	8.42e-27	2.53e-15	2.53e-15	-10.718	7.91246	8405	8453
AAGCTGGT	ACCAGCTT	0.000145509	0.00011477	0.000130139	-0.0419836	0.0376452	1.09e-24	8.25e-20	8.25e-20	-10.258	9.11016	4206	4116	4.65e-08	1.44e-07	9.54e-08	-0.00304381	0.00540899	0.853121	0.744239	0.853121	-0.185138	0.326246	4259	4181	5.56e-06	1.42e-05	9.88e-06	-0.0226791	0.0365548	0.0409581	0.0010804	0.0409581	-2.04396	3.26872	4295	4218
AAGGAAAA	TTTTCCTT	0.000111463	0.000149973	0.000130718	-0.0167399	0.0193844	2.77e-19	2.14e-25	2.77e-19	-8.97794	10.4142	19017	19048	0.00115399	0.00119162	0.0011728	-0.217272	0.220253	3.97e-187	3.64e-193	3.97e-187	-29.1839	29.6565	19427	19488	0.000473827	0.000560462	0.000517144	-0.0937499	0.101925	1.8e-79	1.17e-93	1.8e-79	-18.8783	20.5326	20034	20047
AAGGAAAC	GTTTCCTT	0.000118452	4.26e-05	8.05e-05	-0.0272392	0.0164195	2.14e-20	2.86e-08	2.86e-08	-9.25516	5.54957	8044	7949	0.00028924	0.000197254	0.000243247	-0.175356	0.144125	2.67e-48	1.73e-33	1.73e-33	-14.6044	12.06	7884	7957	9.09e-05	4.32e-05	6.7e-05	-0.0663821	0.0456614	1.4e-16	1.22e-08	1.22e-08	-8.2651	5.69726	8095	8129
AAGGAAAT	ATTTCCTT	1.17e-05	0.000244132	0.000127925	-0.0061785	0.0303644	0.00360563	2.75e-40	0.00360563	-2.91076	13.2878	15408	13139	0.00104966	0.00103183	0.00104074	-0.259773	0.255381	2.18e-170	1.58e-167	1.58e-167	-27.832	27.5944	12917	13040	0.000404544	0.000546889	0.000475717	-0.108584	0.125138	4.02e-68	1.95e-91	4.02e-68	-17.443	20.2823	13359	13482
AAGGAACA	TGTTCCTT	9.7e-05	0.000187107	0.00014204	-0.0260891	0.0357357	5.58e-17	2.84e-31	5.58e-17	-8.374	11.6325	7126	7355	0.000937344	0.000952286	0.000944815	-0.330447	0.329615	2.29e-152	9.18e-155	2.29e-152	-26.2994	26.5084	7160	7314	0.000235817	0.000229376	0.000232597	-0.112051	0.109363	1.88e-40	2.14e-39	2.14e-39	-13.3164	13.1333	7341	7499
AAGGAGAA	TTCTCCTT	0.000297469	0.000244457	0.000270963	-0.0343645	0.0301036	1.05e-48	2.45e-40	2.45e-40	-14.6681	13.2967	11867	12186	0.00164429	0.00165968	0.00165199	-0.328914	0.322513	8.4e-266	2.84e-268	8.4e-266	-34.8449	35.0079	11919	12225	0.000319428	0.00025694	0.000288184	-0.0985632	0.0852912	3.59e-54	6.4e-44	6.4e-44	-15.499	13.9002	12180	12423
AAGGCAAA	TTTGCCTT	9.37e-05	0.00014634	0.00012001	-0.0236541	0.0295493	1.87e-16	8.07e-25	1.87e-16	-8.23057	10.2873	8406	8423	0.000195854	0.000238996	0.000217425	-0.138348	0.15308	2.91e-33	3.26e-40	2.91e-33	-12.0171	13.2751	8553	8543	0.000120655	9.16e-05	0.000106109	-0.0734693	0.0639216	1.66e-21	1.07e-16	1.07e-16	-9.52464	8.2971	8749	8782
AAGGCAAG	CTTGCCTT	6.22e-05	4.42e-05	5.32e-05	-0.0218761	0.0183841	2.01e-11	1.55e-08	1.55e-08	-6.70504	5.65615	6323	6523	0.000505434	0.000638782	0.000572108	-0.255029	0.285172	4.84e-83	1.88e-104	4.84e-83	-19.3079	21.7074	6297	6524	0.000284489	0.000313559	0.000299024	-0.12973	0.13555	1.93e-48	3.29e-53	1.93e-48	-14.6266	15.3559	6417	6637
AAGGCACA	TGTGCCTT	0.000100739	8.28e-05	9.18e-05	-0.0319499	0.0289333	1.4e-17	1.01e-14	1.01e-14	-8.53511	7.73848	4998	4980	0.000176486	0.000230445	0.000203465	-0.170911	0.195422	3.86e-30	7.77e-39	3.86e-30	-11.4074	13.0354	5095	5046	8.04e-05	0.000138896	0.000109645	-0.0784179	0.102924	7.58e-15	1.63e-24	7.58e-15	-7.77459	10.2194	5162	5132
AAGGCAGA	TCTGCCTT	2.78e-05	7.43e-05	5.1e-05	-0.0117105	0.0196959	7.37e-06	2.31e-13	7.37e-06	-4.48273	7.32971	10250	9625	0.000562614	0.000599336	0.000580975	-0.223328	0.228502	3.18e-92	4.05e-98	3.18e-92	-20.3714	21.026	9448	9608	0.000390615	0.000354349	0.000372482	-0.126282	0.119076	7.7e-66	6.76e-60	6.76e-60	-17.1399	16.3246	9608	9798
AAGGCCGG	CCGGCCTT	0.000122133	0.00017751	0.000149821	0.0695566	-0.0850144	5.58e-21	9.35e-30	5.58e-21	9.39788	-11.3302	1276	1244	6.47e-09	4.18e-07	2.12e-07	0.00203893	0.0164803	0.944933	0.578811	0.944933	0.0690707	0.555122	1311	1296	6.67e-05	3.32e-05	4.99e-05	0.142003	-0.1008	1.45e-12	5.95e-07	5.95e-07	7.07947	-4.99283	1307	1287
AAGGCGGA	TCCGCCTT	8.91e-05	8.3e-05	8.6e-05	0.0672938	-0.0650007	9.96e-16	9.48e-15	9.48e-15	8.02755	-7.74619	988	998	1.62e-05	1.03e-05	1.32e-05	-0.114353	0.0924719	0.000547951	0.00597154	0.00597154	-3.45617	2.74935	1002	1015	1.05e-06	1.3e-05	7.03e-06	0.0199871	-0.0715147	0.375254	0.00175935	0.375254	0.886675	-3.12812	991	1009
AAGGCGGG	CCCGCCTT	0.000553967	0.000654592	0.00060428	0.100837	-0.107248	3.95e-89	5.65e-105	3.95e-89	20.0194	-21.7628	2777	2896	1.3e-06	8.67e-08	6.93e-07	-0.0195806	-0.00494137	0.327639	0.800432	0.800432	-0.978881	-0.252788	2882	3013	6.73e-05	0.0001073	8.73e-05	0.096822	-0.119494	1.13e-12	2.66e-19	1.13e-12	7.11414	-8.982	2859	2987
AAGGCTGC	GCAGCCTT	8.92e-05	5.14e-05	7.03e-05	0.0291208	-0.0222351	9.5e-16	1.07e-09	1.07e-09	8.03332	-6.09879	5314	5245	2.35e-05	1.64e-05	2e-05	-0.0602248	0.0505563	3.11e-05	0.000507206	0.000507206	-4.16526	3.47694	5454	5366	2.05e-05	6.01e-06	1.33e-05	-0.0384385	0.0209204	8.55e-05	0.0334627	0.0334627	-3.92847	2.12649	5470	5384
AAGGGAGG	CCTCCCTT	0.000151306	0.000188873	0.000170089	-0.0308857	0.0332765	1.32e-25	1.49e-31	1.32e-25	-10.4604	11.6873	7167	7312	3.99e-09	1.1e-08	7.5e-09	-0.000636951	-0.00101465	0.956722	0.928225	0.956722	-0.0542677	-0.0900789	7344	7471	4.42e-06	9.98e-06	7.2e-06	-0.0144384	0.020908	0.0682586	0.00615188	0.0682586	-1.8233	2.73958	7362	7496
AAGGGGAA	TTCCCCTT	0.000218796	0.000166952	0.000192874	-0.0349167	0.0293055	2.77e-36	4.39e-28	4.39e-28	-12.5792	10.988	8087	8150	1.07e-05	1.2e-05	1.14e-05	-0.0311483	0.0322816	0.00494258	0.00293839	0.00494258	-2.81076	2.97412	8185	8236	1.11e-06	1.1e-05	6.07e-06	0.0068342	0.0213745	0.360643	0.00397458	0.360643	0.914141	2.88018	8277	8302
AAGGTCAG	CTGACCTT	0.000344564	0.000304696	0.00032463	0.052175	-0.0488205	3.91e-56	7.59e-50	7.59e-50	15.7869	-14.8453	6392	6477	2.32e-05	2.01e-05	2.16e-05	-0.0545298	0.0503761	3.6e-05	0.000117342	0.000117342	-4.13178	3.85164	6554	6693	4.39e-05	3.87e-05	4.13e-05	0.0511936	-0.0476954	9.18e-09	6.83e-08	6.83e-08	5.7452	-5.39568	6604	6730
AAGGTCTC	GAGACCTT	7.61e-05	7.12e-05	7.37e-05	-0.0322383	0.0312155	1.18e-13	7.19e-13	7.19e-13	-7.41917	7.17599	3672	3687	1.42e-06	1.07e-07	7.65e-07	0.0178282	-0.00490185	0.305611	0.778813	0.778813	1.02447	-0.280867	3742	3740	1.72e-07	1.1e-05	5.58e-06	0.00422218	0.0338534	0.719123	0.00403651	0.719123	0.359632	2.8753	3777	3775
AAGGTGGG	CCCACCTT	0.000107611	0.000199956	0.000153783	0.0258936	-0.0356542	1.13e-18	2.63e-33	1.13e-18	8.82143	-12.0254	7884	7904	1.04e-05	1.36e-05	1.2e-05	0.0323444	-0.0374252	0.00552088	0.00153108	0.00552088	2.77497	-3.16874	8165	8135	1.71e-05	7.88e-06	1.25e-05	0.0283196	-0.019476	0.000336905	0.0149481	0.0149481	3.58515	-2.43364	8167	8146
AAGGTGTA	TACACCTT	3.45e-05	3.09e-05	3.27e-05	0.0252421	-0.0237944	6e-07	2.26e-06	2.26e-06	4.9912	-4.72859	2762	2781	0.0020454	0.00229195	0.00216868	0.796457	-0.833783	0	0	0	38.871	-41.1522	2743	2796	0.000327279	0.000458239	0.000392759	0.213897	-0.251008	1.85e-55	6.42e-77	1.85e-55	15.6884	-18.565	2845	2884
AAGTAAAA	TTTTACTT	7.99e-05	8.68e-05	8.33e-05	-0.0182578	0.0191474	2.99e-14	2.31e-15	2.99e-14	-7.59898	7.92348	11718	11651	0.000376724	0.000502912	0.000439818	-0.157114	0.182252	2.3e-62	1.23e-82	2.3e-62	-16.6681	19.2596	12385	12333	0.000479728	0.000423358	0.000451543	-0.118427	0.111854	1.94e-80	3.32e-71	3.32e-71	-18.9955	17.8441	13012	12926
AAGTACTG	NA	7.17e-05	NA	7.17e-05	-0.0306249	NA	5.91e-13	NA	5.91e-13	-7.2027	NA	3858	NA	3.15e-06	NA	3.15e-06	-0.0258807	NA	0.127602	NA	0.127602	-1.52363	NA	3951	NA	1.4e-07	NA	1.4e-07	-0.00370369	NA	0.745372	NA	0.745372	-0.324748	NA	4024	NA
AAGTAGCT	AGCTACTT	0.00308877	0.00270767	0.00289822	-0.112242	0.104936	0	0	0	-47.3317	44.3072	12493	12613	8.52e-06	1.36e-05	1.1e-05	0.0235765	-0.0296373	0.012179	0.00157043	0.012179	2.50692	-3.16136	13020	13200	6.97e-05	7.66e-05	7.32e-05	-0.0460044	0.0480815	4.51e-13	3.18e-14	4.51e-13	-7.23947	7.59072	13096	13278
AAGTCAAA	TTTGACTT	0.000295918	0.000410181	0.000353049	-0.0442384	0.0514806	1.84e-48	1.77e-66	1.84e-48	-14.6298	17.2252	7561	7683	0.0010577	0.00115477	0.00110624	-0.339968	0.351122	1.12e-171	2.97e-187	1.12e-171	-27.9386	29.1939	7626	7746	0.000951963	0.000917586	0.000934774	-0.217126	0.210635	9.82e-158	4.14e-152	4.14e-152	-26.7649	26.2768	7876	8002
AAGTCAAC	GTTGACTT	6.93e-05	3.42e-05	5.18e-05	-0.0347756	0.0243319	1.43e-12	6.68e-07	6.68e-07	-7.0811	4.9704	2910	2922	0.000326417	0.000329337	0.000327877	-0.309174	0.308401	2.8e-54	9.51e-55	2.8e-54	-15.5149	15.5842	2883	2920	0.000199904	0.000207602	0.000203753	-0.162401	0.164314	1.49e-34	8.09e-36	1.49e-34	-12.2604	12.4942	2999	3039
AAGTCAAT	ATTGACTT	6.75e-05	4.57e-05	5.66e-05	-0.0279286	0.0225477	2.84e-12	9.07e-09	9.07e-09	-6.98543	5.74728	4333	4560	0.000723384	0.00054073	0.000632057	-0.371305	0.314223	4.97e-118	1.04e-88	1.04e-88	-23.1012	19.971	4381	4624	9.47e-05	0.000119469	0.000107064	-0.0898279	0.0986323	3.28e-17	2.61e-21	3.28e-17	-8.43632	9.47768	4585	4858
AAGTCAGG	CCTGACTT	0.000108684	6.14e-05	8.51e-05	0.0280053	-0.0212265	7.65e-19	2.64e-11	2.64e-11	8.8653	-6.66572	7069	6917	0.000693586	0.000742566	0.000718076	0.288664	-0.301869	3.01e-113	4.14e-121	3.01e-113	22.62	-23.4057	7071	6882	1.61e-05	2.53e-05	2.07e-05	0.0297533	-0.0376751	0.000506285	1.3e-05	0.000506285	3.47742	-4.35939	7235	7048
AAGTCTCA	TGAGACTT	0.000196326	0.000167972	0.000182149	-0.0409096	0.0377314	9.88e-33	3.02e-28	3.02e-28	-11.9157	11.0215	5936	5953	0.000488809	0.00054809	0.000518449	-0.26295	0.27846	2.26e-80	6.84e-90	2.26e-80	-18.9875	20.1065	5955	5948	0.000657971	0.000562896	0.000610434	-0.207595	0.191839	1.27e-109	4.67e-94	4.67e-94	-22.2482	20.5772	6028	6027
AAGTGAGA	TCTCACTT	6.81e-05	7.71e-05	7.26e-05	0.0210567	-0.0223304	2.24e-12	8.36e-14	2.24e-12	7.01861	-7.46463	7748	7619	9.15e-08	2.51e-07	1.71e-07	0.00311254	-0.00518799	0.795115	0.666792	0.795115	0.259674	-0.430555	7943	7788	4.38e-06	3.5e-06	3.94e-06	0.0146461	-0.013141	0.0697023	0.104656	0.104656	1.81384	-1.62269	8038	7899
AAGTGATC	GATCACTT	0.00187137	0.00185697	0.00186417	-0.0884406	0.0876798	1.72e-296	3.17e-294	3.17e-294	-36.8192	36.677	11557	11621	2.82e-05	2.89e-05	2.86e-05	0.0433853	-0.0436829	5.03e-06	3.84e-06	5.03e-06	4.56353	-4.61974	12073	12150	1.44e-05	1.37e-05	1.41e-05	0.0211418	-0.0205082	0.000999458	0.00132348	0.00132348	3.29069	-3.21085	12145	12229
AAGTGATT	AATCACTT	0.00144506	0.00135495	0.0014	-0.0799337	0.0765109	2.18e-229	3.31e-215	3.31e-215	-32.3478	31.3216	11436	11656	0.000107405	7.67e-05	9.2e-05	0.0869402	-0.0726934	5.66e-19	5.59e-14	5.59e-14	8.89871	-7.51753	11957	12151	1.98e-06	7.04e-09	9.94e-07	0.00802094	-0.000473613	0.22236	0.942002	0.942002	1.22028	-0.072754	12139	12314
AAGTGCAG	NA	9.38e-05	NA	9.38e-05	-0.0311382	NA	1.8e-16	NA	1.8e-16	-8.23499	NA	4872	NA	1.55e-06	NA	1.55e-06	0.0161014	NA	0.284347	NA	0.284347	1.07061	NA	5014	NA	8.86e-07	NA	8.86e-07	-0.00827626	NA	0.414491	NA	0.414491	-0.816016	NA	5065	NA
AAGTGCTA	TAGCACTT	0.000302113	0.000397771	0.000349942	-0.0515644	0.0587765	1.94e-49	1.6e-64	1.94e-49	-14.7822	16.9625	5760	5789	3.3e-06	1.44e-06	2.37e-06	-0.021636	0.0142784	0.118759	0.302568	0.302568	-1.56	1.03094	5958	5967	9.33e-06	7.92e-06	8.63e-06	-0.02471	0.0227787	0.00809327	0.0146627	0.0146627	-2.64816	2.44061	6047	6036
AAGTGCTG	CAGCACTT	0.00794995	0.00771329	0.00783162	-0.119878	0.118942	0	0	0	-76.1208	74.9703	28310	28040	7.23e-06	1.87e-05	1.3e-05	0.01447	-0.023441	0.0209222	0.000202994	0.0209222	2.30939	-3.71528	29529	29229	0.00101581	0.000964136	0.000989972	-0.11729	0.115094	3.51e-168	1e-159	1e-159	-27.6488	26.9357	29540	29224
AAGTGTCT	AGACACTT	4.04e-05	2.75e-05	3.4e-05	0.0196093	-0.0164058	6.5e-08	8.09e-06	8.09e-06	5.40456	-4.46291	5198	5171	0.000845161	0.000941819	0.00089349	0.369603	-0.389648	1.42e-137	4.39e-153	1.42e-137	24.9716	-26.3621	5217	5218	0.000153006	0.000166119	0.000159562	0.106306	-0.11098	7.72e-27	5.36e-29	7.72e-27	10.726	-11.1762	5342	5316
AAGTGTGA	TCACACTT	3.83e-07	4.66e-07	4.24e-07	-0.00203725	-0.00225058	0.598774	0.56155	0.598774	-0.526164	-0.580541	4660	4626	9.52e-05	8.96e-05	9.24e-05	0.130026	-0.126076	5.43e-17	4.32e-16	4.32e-16	8.37713	-8.1295	4738	4721	7.8e-05	0.000112316	9.51e-05	0.0797728	-0.095883	1.91e-14	3.95e-20	1.91e-14	7.65688	-9.18955	4832	4795
AAGTGTGT	ACACACTT	4.2e-05	2.57e-05	3.39e-05	0.0200989	-0.014681	3.58e-08	1.61e-05	1.61e-05	5.51038	-4.31373	5110	5712	0.000216889	0.000257768	0.000237328	0.188694	-0.21205	1.19e-36	3.1e-43	1.19e-36	12.6462	-13.7868	5053	4780	0.000194774	0.000209622	0.000202198	0.121237	-0.129372	1.04e-33	3.77e-36	1.04e-33	12.102	-12.5549	5146	4908
AAGTGTTG	CAACACTT	0.000251622	0.000336258	0.00029394	-0.0464411	0.0542958	1.81e-41	7.98e-55	1.81e-41	-13.4902	15.5954	5930	5810	4.5e-05	8.33e-05	6.41e-05	0.0792342	-0.108573	8.48e-09	4.7e-15	8.48e-09	5.75873	-7.83489	6074	5992	1.2e-05	2.56e-05	1.88e-05	0.0277439	-0.0408939	0.00268882	1.13e-05	0.00268882	3.00125	-4.39102	6182	6095
AAGTTGAA	NA	0.000112677	NA	0.000112677	-0.0300595	NA	1.77e-19	NA	1.77e-19	-9.02672	NA	6235	NA	0.000723496	NA	0.000723496	-0.308863	NA	4.76e-118	NA	4.76e-118	-23.103	NA	6315	NA	0.000168371	NA	0.000168371	-0.100189	NA	2.28e-29	NA	2.28e-29	-11.2517	NA	6544	NA
AAGTTTTT	NA	4.18e-05	NA	4.18e-05	0.0146877	NA	3.79e-08	NA	3.79e-08	5.50025	NA	9705	NA	0.000214898	NA	0.000214898	0.132887	NA	2.48e-36	NA	2.48e-36	12.588	NA	10122	NA	8.87e-05	NA	8.87e-05	0.0571839	NA	3.24e-16	NA	3.24e-16	8.16414	NA	10555	NA
AATAAAAA	TTTTTATT	8.44e-05	4.32e-05	6.38e-05	-0.010654	0.00752896	5.55e-15	2.3e-08	2.3e-08	-7.81397	5.58778	29107	29690	0.00234257	0.00220824	0.00227541	-0.216398	0.207227	0	0	0	-41.6053	40.392	31892	32331	0.00217471	0.00220136	0.00218804	-0.139912	0.138934	0	0	0	-40.4784	40.7261	33238	33709
AATAAAAC	GTTTTATT	0.00029501	0.000291771	0.00029339	-0.0365012	0.0362587	2.56e-48	8.32e-48	8.32e-48	-14.6073	14.5269	10947	10994	0.000828175	0.000908207	0.000868191	-0.242213	0.253771	7.56e-135	1.09e-147	7.56e-135	-24.7191	25.887	11637	11639	0.00075012	0.000854098	0.000802109	-0.154389	0.16472	1.05e-124	1.02e-141	1.05e-124	-23.7562	25.3506	12136	12173
AATAAAAG	CTTTTATT	0.00039957	0.000348936	0.000374253	-0.0383883	0.0359172	8.33e-65	8e-57	8e-57	-17.0009	15.8868	13436	13399	0.0016298	0.00171616	0.00167298	-0.308	0.317636	1.78e-263	2.46e-277	1.78e-263	-34.6907	35.5995	14123	13970	0.000789042	0.000758011	0.000773526	-0.143915	0.141443	4.5e-131	5.39e-126	5.39e-126	-24.3652	23.8809	14678	14568
AATAAAAT	ATTTTATT	0.000258952	0.000160005	0.000209478	-0.0185421	0.0146767	1.26e-42	5.52e-27	5.52e-27	-13.6853	10.757	23530	23968	0.0024722	0.00249744	0.00248482	-0.21938	0.223092	0	0	0	-42.7437	42.9618	25985	26396	0.00188609	0.00195181	0.00191895	-0.128699	0.133042	1.35547605976178e-310	2.37151510003798e-321	1.35547605976178e-310	-37.6912	38.3435	27237	27587
AATAAACA	TGTTTATT	0.000216436	0.000196059	0.000206248	-0.0284256	0.0269617	6.54e-36	1.09e-32	1.09e-32	-12.5112	11.9076	13149	13253	0.000931484	0.000740493	0.000835989	-0.235509	0.210014	2e-151	8.91e-121	8.91e-121	-26.217	23.373	13728	13712	0.000852414	0.00079554	0.000823977	-0.15108	0.146027	1.92e-141	3.89e-132	3.89e-132	-25.3256	24.4654	14282	14259
AATAAACC	GGTTTATT	0.00015306	0.000158098	0.000155579	-0.0404149	0.0404702	6.95e-26	1.11e-26	6.95e-26	-10.5209	10.6926	4704	4860	0.000251238	0.000317851	0.000284545	-0.208782	0.231188	3.49e-42	6.69e-53	3.49e-42	-13.611	15.3099	4828	4993	0.000197059	0.000224895	0.000210977	-0.123997	0.130686	4.37e-34	1.17e-38	4.37e-34	-12.1728	13.0043	5025	5177
AATAAACT	AGTTTATT	0.000246551	0.000249431	0.000247991	-0.0373784	0.0375836	1.14e-40	4.01e-41	1.14e-40	-13.3535	13.4313	8827	8881	0.0012308	0.00108492	0.00115786	-0.33239	0.312462	1.88e-199	4.79e-176	4.79e-176	-30.1408	28.2961	9280	9273	0.000633334	0.000509185	0.000571259	-0.160362	0.143983	1.37e-105	2.91e-85	2.91e-85	-21.8274	19.5703	9614	9601
AATAAAGA	TCTTTATT	0.000340224	0.000337948	0.000339086	-0.0378152	0.0371669	1.89e-55	4.32e-55	4.32e-55	-15.6872	15.6346	11818	12159	0.00210395	0.00219539	0.00214967	-0.377364	0.381307	0	0	0	-39.4246	40.2741	12193	12477	0.00129115	0.0015417	0.00141642	-0.197572	0.213602	3.1e-213	3.12e-254	3.1e-213	-31.1759	34.0709	12785	13068
AATAAAGC	GCTTTATT	0.000261072	0.000183618	0.000222345	-0.045451	0.038197	5.82e-43	1.01e-30	1.01e-30	-13.7412	11.5235	6307	6317	0.000384478	0.000344946	0.000364712	-0.221897	0.21011	1.3e-63	2.94e-57	2.94e-57	-16.8388	15.9493	6488	6536	0.000275742	0.000173664	0.000224703	-0.12654	0.100397	5.25e-47	3.07e-30	3.07e-30	-14.3999	11.4272	6698	6739
AATAAAGG	CCTTTATT	0.00038909	0.000324152	0.000356621	-0.0517099	0.0476554	3.74e-63	6.48e-53	6.48e-53	-16.7763	15.312	7252	7164	0.00118243	0.00112064	0.00115153	-0.362823	0.356742	1.08e-191	8.91e-182	8.91e-182	-29.5418	28.7586	7466	7341	0.0008018	0.000699078	0.000750439	-0.200823	0.189949	3.67e-133	2.38e-116	2.38e-116	-24.5616	22.9332	7736	7568
AATAAAGT	NA	0.000127794	NA	0.000127794	-0.0275166	NA	7.05e-22	NA	7.05e-22	-9.61328	NA	8431	NA	0.000200239	NA	0.000200239	-0.136441	NA	5.71e-34	NA	5.71e-34	-12.151	NA	8939	NA	0.00029977	NA	0.00029977	-0.111915	NA	6.01e-51	NA	6.01e-51	-15.0144	NA	9318	NA
AATAAATA	TATTTATT	0.000142831	9.67e-05	0.000119777	0.0100892	-0.00836426	2.91e-24	6.11e-17	6.11e-17	10.1632	-8.36322	21930	21989	0.000524801	0.000473923	0.000499362	-0.0728078	0.0692389	3.75e-86	5.56e-78	5.56e-78	-19.6745	18.696	24622	24537	0.000457488	0.00046664	0.000462064	-0.0460128	0.0465638	8.52e-77	2.7e-78	8.52e-77	-18.5498	18.7345	25652	25510
AATAAATC	GATTTATT	0.00014801	0.0001218	0.000134905	-0.0323188	0.0293346	4.39e-25	6.3e-21	6.3e-21	-10.3458	9.38507	7086	7105	0.000240214	0.000225812	0.000233013	-0.164521	0.159516	2.08e-40	4.33e-38	4.33e-38	-13.3089	12.9037	7394	7421	0.000200375	0.000216564	0.000208469	-0.100957	0.10462	1.25e-34	2.73e-37	1.25e-34	-12.2748	12.7611	7655	7746
AATAAATG	CATTTATT	0.000334987	0.000320083	0.000327535	-0.0318001	0.0310974	1.27e-54	2.84e-52	2.84e-52	-15.5659	15.2156	16181	16094	0.002233	0.00204693	0.00213997	-0.327416	0.315001	0	0	0	-40.6184	38.8856	16901	16704	0.00075	0.000742635	0.000746318	-0.127035	0.127015	1.1e-124	1.77e-123	1.77e-123	-23.7543	23.6373	17669	17451
AATAAATT	AATTTATT	9.59e-05	0.00011913	0.000107537	-0.0178777	0.0199455	8.14e-17	1.67e-20	8.14e-17	-8.32944	9.28164	14798	14682	0.000545091	0.00054726	0.000546175	-0.164283	0.165344	2.07e-89	9.3e-90	2.07e-89	-20.0514	20.0913	16323	16185	0.000481695	0.000465254	0.000473475	-0.103027	0.10185	9.24e-81	4.55e-78	4.55e-78	-19.0344	18.7066	17140	16962
AATAACAA	TTGTTATT	0.000120773	0.000203402	0.000162088	-0.0253644	0.0326178	9.18e-21	7.51e-34	9.18e-21	-9.34544	12.1286	9266	9328	0.000995646	0.0011428	0.00106922	-0.289534	0.309234	1.01e-161	2.47e-185	1.01e-161	-27.1057	29.042	9745	9726	0.000670822	0.000821813	0.000746317	-0.158967	0.175196	1e-111	1.95e-136	1e-111	-22.4646	24.8665	10202	10198
AATAACAC	GTGTTATT	8.08e-05	0.000117228	9.9e-05	-0.0316739	0.0376474	2.09e-14	3.36e-20	2.09e-14	-7.64494	9.20721	4074	4088	0.000530439	0.000642166	0.000586302	-0.325779	0.355209	4.67e-87	5.4e-105	4.67e-87	-19.78	21.7648	4200	4197	0.000294342	0.000320129	0.000307235	-0.16293	0.167866	4.67e-50	2.76e-54	4.67e-50	-14.8778	15.516	4371	4390
AATAACAG	CTGTTATT	0.000123918	0.000138311	0.000131115	-0.0310257	0.0327836	2.91e-21	1.51e-23	2.91e-21	-9.46634	10.0011	6481	6501	0.000892519	0.00100766	0.00095009	-0.336283	0.356678	3.57e-145	1.2e-163	3.57e-145	-25.6623	27.269	6597	6659	0.000423796	0.000672894	0.000548345	-0.155756	0.196495	2.82e-71	4.6e-112	2.82e-71	-17.8533	22.4993	6829	6859
AATAACCA	TGGTTATT	0.000125393	0.00015713	0.000141262	-0.0336235	0.0377391	1.7e-21	1.58e-26	1.7e-21	-9.52253	10.6599	5579	5598	0.0015697	0.00142911	0.0014994	-0.484758	0.462726	7.82e-254	2.85e-231	2.85e-231	-34.0441	32.4814	5590	5647	0.000557567	0.00046362	0.000510593	-0.193633	0.177435	3.48e-93	8.44e-78	8.44e-78	-20.4795	18.6737	5827	5833
AATAACTA	TAGTTATT	0.000155468	0.00013394	0.000144704	-0.0365613	0.0343989	2.89e-26	7.47e-23	7.47e-23	-10.6033	9.84174	5798	5675	0.000858416	0.000852252	0.000855334	-0.340381	0.346821	1.06e-139	1.03e-138	1.03e-138	-25.1668	25.0762	6113	5915	0.000423417	0.000498066	0.000460741	-0.159946	0.177173	3.25e-71	1.93e-83	3.25e-71	-17.8454	19.3553	6395	6214
AATAAGAA	TTCTTATT	4.77e-05	3.43e-05	4.1e-05	-0.0154726	0.0130289	4.3e-09	6.3e-07	6.3e-07	-5.87245	4.98198	9791	9978	0.000239712	0.000285142	0.000262427	-0.137102	0.149578	2.5e-40	1.22e-47	2.5e-40	-13.295	14.5006	10410	10497	0.000192415	0.00025311	0.000222763	-0.0822122	0.0941547	2.54e-33	2.72e-43	2.54e-33	-12.0285	13.7962	10866	10950
AATAAGAC	NA	4.57e-05	NA	4.57e-05	-0.0231998	NA	9.12e-09	NA	9.12e-09	-5.74638	NA	4273	NA	0.000119155	NA	0.000119155	-0.150434	NA	7.07e-21	NA	7.07e-21	-9.37291	NA	4426	NA	0.0001173	NA	0.0001173	-0.100263	NA	5.94e-21	NA	5.94e-21	-9.39127	NA	4592	NA
AATAAGAG	CTCTTATT	7.03e-05	0.00010399	8.71e-05	-0.0243138	0.0298	1.02e-12	4.26e-18	1.02e-12	-7.1278	8.67174	6011	5903	0.000535004	0.000437555	0.000486279	-0.270271	0.245755	8.63e-88	3.86e-72	3.86e-72	-19.8649	17.964	6164	6064	0.000340936	0.000242129	0.000291532	-0.145474	0.122884	1.07e-57	1.73e-41	1.73e-41	-16.0125	13.4935	6346	6290
AATAAGCA	TGCTTATT	0.000132248	0.000127558	0.000129903	-0.0327837	0.0320606	1.39e-22	7.68e-22	7.68e-22	-9.77936	9.60439	6152	6236	0.000199648	0.000194009	0.000196829	-0.160855	0.159266	7.11e-34	5.77e-33	5.77e-33	-12.133	11.9604	6418	6390	0.000155447	0.000223917	0.000189682	-0.0954895	0.114959	3.06e-27	1.69e-38	3.06e-27	-10.8112	12.976	6644	6624
AATAATAA	TTATTATT	2.52e-05	1.81e-05	2.16e-05	-0.00494785	0.00421157	1.98e-05	0.000299947	0.000299947	-4.26704	3.61536	16967	16968	0.000556504	0.000526523	0.000541514	-0.0869154	0.0853327	3.05e-91	1.99e-86	1.99e-86	-20.2604	19.7068	18983	18778	0.000442978	0.000439958	0.000441468	-0.0524651	0.0526354	2.03e-74	6.34e-74	6.34e-74	-18.2531	18.1907	19860	19595
AATAATAG	CTATTATT	8.66e-06	6.32e-06	7.49e-06	-0.00755562	0.00642926	0.0123522	0.0325329	0.0325329	-2.50193	2.1378	7522	7593	0.000177701	0.000177668	0.000177684	-0.135392	0.134872	2.46e-30	2.49e-30	2.49e-30	-11.4466	11.4455	7990	8089	0.000179218	0.000147806	0.000163512	-0.0911276	0.0824966	3.75e-31	5.55e-26	5.55e-26	-11.6086	10.5421	8337	8419
AATAATCA	TGATTATT	4.24e-05	7.96e-05	6.1e-05	-0.0173595	0.0235833	3.07e-08	3.23e-14	3.07e-08	-5.53721	7.5889	6964	7099	0.000234331	0.000355648	0.00029499	-0.161945	0.198951	1.84e-39	5.6e-59	1.84e-39	-13.1449	16.195	7370	7431	0.000117242	0.000212698	0.00016497	-0.0767744	0.102815	6.08e-21	1.18e-36	6.08e-21	-9.38894	12.6467	7682	7781
AATACAAA	TTTGTATT	0.00655689	0.00674565	0.00665127	0.0996688	-0.100899	0	0	0	69.0821	-70.076	33005	33350	0.000788409	0.000627512	0.00070796	-0.137726	0.12273	1.82e-128	1.21e-102	1.21e-102	-24.1179	21.5149	34693	34916	9.16e-05	0.000128235	0.000109902	0.0318863	-0.0376895	1.07e-16	9.33e-23	1.07e-16	8.29741	-9.81929	35184	35408
AATACAAC	GTTGTATT	5.61e-05	4.9e-05	5.25e-05	-0.0271777	0.0257979	1.92e-10	2.63e-09	2.63e-09	-6.36738	5.95332	3857	3708	0.000289798	0.000443096	0.000366447	-0.24921	0.312501	2.17e-48	4.97e-73	2.17e-48	-14.6185	18.0775	3947	3807	0.000173183	0.000255051	0.000214117	-0.129183	0.158795	3.69e-30	1.31e-43	3.69e-30	-11.4114	13.849	4108	3976
AATACACA	TGTGTATT	0.000120635	0.000215069	0.000167852	-0.0298875	0.0376524	9.65e-21	1.08e-35	9.65e-21	-9.34009	12.4716	6697	7536	0.000421583	0.000439953	0.000430768	-0.224572	0.227713	1.42e-69	1.59e-72	1.42e-69	-17.633	18.0132	6955	7021	0.000392396	0.0004607	0.000426548	-0.14506	0.156025	3.93e-66	2.54e-77	3.93e-66	-17.1789	18.6148	7253	7334
AATACAGA	TCTGTATT	3.73e-05	1.76e-05	2.75e-05	-0.0158094	0.0108603	2.08e-07	0.000355225	0.000355225	-5.19212	3.57131	7426	7508	0.000353781	0.000423641	0.000388711	-0.195601	0.213355	1.12e-58	6.64e-70	1.12e-58	-16.1524	17.676	7650	7776	6.92e-05	9.6e-05	8.26e-05	-0.0583662	0.068403	5.45e-13	2e-17	5.45e-13	-7.21378	8.4941	7871	8029
AATACCAA	TTGGTATT	5.92e-05	5.72e-05	5.82e-05	-0.0249188	0.0238907	6.04e-11	1.26e-10	1.26e-10	-6.54273	6.43209	4760	4934	0.000496095	0.000509836	0.000502965	-0.289866	0.289126	1.53e-81	9.5e-84	1.53e-81	-19.1286	19.3918	4927	5020	0.00026086	0.000340786	0.000300823	-0.140731	0.157984	1.45e-44	1.13e-57	1.45e-44	-14.0059	16.009	5146	5252
AATACCAC	GTGGTATT	6.99e-05	8.65e-05	7.82e-05	-0.0315207	0.0335824	1.18e-12	2.63e-15	1.18e-12	-7.10823	7.9076	3560	3630	0.000463852	0.000482596	0.000473224	-0.328764	0.32198	2.31e-76	2.25e-79	2.31e-76	-18.4962	18.8664	3613	3674	0.000193552	0.000192875	0.000193213	-0.14322	0.13763	1.65e-33	2.13e-33	2.13e-33	-12.064	12.0428	3717	3772
AATACCAT	ATGGTATT	0.000141434	0.000169803	0.000155619	-0.0337247	0.0372964	4.84e-24	1.55e-28	4.84e-24	-10.1134	11.0815	6230	6155	0.00136558	0.000995819	0.0011807	-0.422565	0.364323	4.45e-221	9.5e-162	9.5e-162	-31.7503	27.1081	6374	6295	0.00041937	0.000381769	0.000400569	-0.15819	0.15237	1.5e-70	2.17e-64	2.17e-64	-17.7598	16.9446	6548	6467
AATACCTA	TAGGTATT	0.000194785	0.000206672	0.000200728	-0.0416566	0.0435937	1.73e-32	2.28e-34	1.73e-32	-11.8688	12.2257	5564	5481	0.00060783	0.000583937	0.000595883	-0.297641	0.294167	1.75e-99	1.2e-95	1.2e-95	-21.1746	20.754	5713	5661	0.000199506	0.000176123	0.000187814	-0.114369	0.108793	1.73e-34	1.21e-30	1.21e-30	-12.2481	11.5079	5891	5846
AATACTAC	GTAGTATT	6.15e-05	5.85e-05	6e-05	-0.0316435	0.030018	2.6e-11	7.84e-11	7.84e-11	-6.66764	6.50365	3097	3273	0.000248175	0.000328242	0.000288209	-0.252821	0.282524	1.08e-41	1.43e-54	1.08e-41	-13.5277	15.5582	3248	3442	6.56e-05	0.000117457	9.15e-05	-0.0872562	0.113808	2.18e-12	5.6e-21	2.18e-12	-7.02268	9.39753	3379	3552
AATACTAT	ATAGTATT	0.000179107	0.000221867	0.000200487	-0.0365677	0.0405196	5.23e-30	9.06e-37	5.23e-30	-11.3811	12.6673	6684	6824	0.00032838	0.000293349	0.000310864	-0.195817	0.185357	1.36e-54	5.84e-49	5.84e-49	-15.5615	14.7078	7105	7177	5.84e-05	7.63e-05	6.74e-05	-0.0554734	0.0634749	3.41e-11	3.63e-14	3.41e-11	-6.6277	7.57364	7369	7457
AATAGAAA	TTTCTATT	2.38e-05	2.89e-05	2.63e-05	-0.00939629	0.0103624	3.37e-05	4.93e-06	3.37e-05	-4.14675	4.56789	13113	13145	0.000762456	0.00080362	0.000783038	-0.210662	0.217424	2.66e-124	6.59e-131	2.66e-124	-23.7173	24.3496	13854	13818	0.00064158	0.000666656	0.000654118	-0.128875	0.132065	6.14e-107	4.82e-111	6.14e-107	-21.9692	22.3947	14586	14504
AATAGAAC	NA	2.4e-05	NA	2.4e-05	-0.0174661	NA	3.06e-05	NA	3.06e-05	-4.16871	NA	3975	NA	0.0001069	NA	0.0001069	-0.147718	NA	6.83e-19	NA	6.83e-19	-8.8778	NA	4117	NA	6.95e-05	NA	6.95e-05	-0.0800618	NA	4.89e-13	NA	4.89e-13	-7.22852	NA	4268	NA
AATAGACA	TGTCTATT	0.000334908	0.00032322	0.000329064	-0.0527189	0.050994	1.3e-54	9.09e-53	9.09e-53	-15.5641	15.29	6030	6139	0.00251817	0.00286378	0.00269097	-0.591943	0.624889	0	0	0	-43.1402	46.0135	5954	6056	0.00136962	0.00160617	0.00148789	-0.290502	0.310867	4.49e-226	8.78e-265	4.49e-226	-32.1104	34.7771	6292	6409
AATAGACC	GGTCTATT	7.01e-05	3.69e-05	5.35e-05	-0.0387955	0.0277056	1.08e-12	2.37e-07	2.37e-07	-7.12057	5.16741	2344	2385	0.00139188	0.00155489	0.00147339	-0.706743	0.73608	2.67e-225	1.86e-251	2.67e-225	-32.055	33.8829	2338	2375	0.000524451	0.000610949	0.0005677	-0.29122	0.310512	9.21e-88	6.34e-102	9.21e-88	-19.8617	21.438	2429	2456
AATAGAGA	TCTCTATT	0.000376132	0.000239446	0.000307789	-0.0498223	0.0394632	4.12e-61	1.51e-39	1.51e-39	-16.4945	13.1596	7594	7594	0.000571209	0.00061097	0.00059109	-0.248034	0.254698	1.33e-93	5.49e-100	1.33e-93	-20.5265	21.2293	7749	7759	0.000393618	0.000416882	0.00040525	-0.138603	0.141216	2.48e-66	3.82e-70	2.48e-66	-17.2057	17.7071	8010	8067
AATAGATA	TATCTATT	4.12e-05	4.83e-05	4.48e-05	-0.0191517	0.021109	4.76e-08	3.4e-09	4.76e-08	-5.45996	5.91109	5554	5279	0.000143218	0.00022679	0.000185004	-0.139757	0.17686	9.08e-25	3.01e-38	9.08e-25	-10.276	12.9316	5923	5631	0.000122473	0.000195297	0.000158885	-0.0862409	0.110811	8.33e-22	8.52e-34	8.33e-22	-9.59612	12.1182	6219	5961
AATAGATG	CATCTATT	0.000123442	0.000106699	0.000115071	-0.0342161	0.0313817	3.46e-21	1.58e-18	1.58e-18	-9.44814	8.78397	5284	5378	0.00062917	0.000615877	0.000622523	-0.311887	0.303483	6.58e-103	8.96e-101	8.96e-101	-21.5433	21.3144	5399	5504	0.000474623	0.000427257	0.00045094	-0.181864	0.169741	1.33e-79	7.63e-72	7.63e-72	-18.8941	17.9261	5596	5718
AATAGCAA	TTGCTATT	0.000252779	0.000186842	0.00021981	-0.0428287	0.0363591	1.19e-41	3.12e-31	3.12e-31	-13.5211	11.6243	6950	7085	0.000277551	0.000225424	0.000251488	-0.18065	0.161158	2.03e-46	5e-38	5e-38	-14.3062	12.8926	7143	7258	0.000167119	0.000154123	0.000160621	-0.0942261	0.0895026	3.67e-29	5.06e-27	5.06e-27	-11.2098	10.7651	7394	7533
AATAGCCA	TGGCTATT	4.4e-05	7.63e-05	6.02e-05	-0.0200894	0.0263141	1.67e-08	1.08e-13	1.67e-08	-5.64313	7.43028	5484	5531	0.000402959	0.000485234	0.000444096	-0.246511	0.269353	1.4e-66	8.48e-80	1.4e-66	-17.2389	18.9179	5555	5580	0.000284691	0.000220624	0.000252658	-0.139386	0.122331	1.79e-48	5.87e-38	5.87e-38	-14.6318	12.8802	5746	5764
AATAGCTG	CAGCTATT	0.000114936	7.43e-05	9.46e-05	-0.0333217	0.0270693	7.76e-20	2.31e-13	2.31e-13	-9.11676	7.32955	5248	5147	1.6e-05	2.14e-05	1.87e-05	-0.0500638	0.0583745	0.000592434	7.25e-05	0.000592434	-3.43507	3.96805	5398	5302	1.01e-05	6.7e-06	8.37e-06	-0.0269301	0.0221431	0.00597767	0.0248625	0.0248625	-2.74901	2.24354	5486	5409
AATAGCTT	NA	5.99e-05	NA	5.99e-05	0.0252928	NA	4.7e-11	NA	4.7e-11	6.58039	NA	4727	NA	7.97e-06	NA	7.97e-06	-0.0372623	NA	0.01533	NA	0.01533	-2.42449	NA	4823	NA	6.01e-06	NA	6.01e-06	-0.0218119	NA	0.0334792	NA	0.0334792	-2.12629	NA	4976	NA
AATATAAA	TTTATATT	1.56e-05	1.98e-05	1.77e-05	-0.00723749	0.00813037	0.000795088	0.000155204	0.000795088	-3.35451	3.78261	14165	14282	0.000332619	0.000380401	0.00035651	-0.126178	0.134466	2.82e-55	5.89e-63	2.82e-55	-15.6617	16.7493	16082	16216	0.000219576	0.000258126	0.000238851	-0.0680111	0.0735282	8.73e-38	4.09e-44	8.73e-38	-12.8496	13.9322	16991	17113
AATATACA	TGTATATT	3.3e-05	3.09e-05	3.19e-05	-0.0140438	0.0135429	1.03e-06	2.3e-06	2.3e-06	-4.88548	4.725	8253	8300	0.000784421	0.000902471	0.000843446	-0.265934	0.284239	7.95e-128	9.04e-147	7.95e-128	-24.0568	25.8051	8881	8978	0.000545594	0.000553731	0.000549662	-0.147435	0.147975	3.18e-91	1.48e-92	3.18e-91	-20.2583	20.4089	9405	9445
AATATACC	GGTATATT	3.71e-05	6.51e-05	5.11e-05	-0.0246309	0.0322341	2.23e-07	6.8e-12	2.23e-07	-5.17919	6.86181	3100	3121	0.000128329	0.000104289	0.000116309	-0.182407	0.161786	2.32e-22	1.81e-18	1.81e-18	-9.72706	8.76869	3247	3297	0.000100009	5.46e-05	7.73e-05	-0.107587	0.078523	4.28e-18	1.49e-10	1.49e-10	-8.67144	6.40696	3410	3440
AATATATA	TATATATT	6.41e-05	2.92e-05	4.67e-05	-0.0140499	0.0093414	9.86e-12	4.26e-06	4.26e-06	-6.80864	4.59808	12998	12966	0.000290305	0.000289866	0.000290085	-0.0915792	0.0960779	1.8e-48	2.12e-48	2.12e-48	-14.6313	14.6202	15932	16008	0.000165811	0.000144749	0.00015528	-0.0450611	0.044464	6.02e-29	1.77e-25	1.77e-25	-11.1659	10.4325	16954	17023
AATATCAC	GTGATATT	9.22e-05	5.87e-05	7.54e-05	-0.0319701	0.0255658	3.27e-16	7.21e-11	7.21e-11	-8.16322	6.51638	4466	4487	0.000191786	0.000273045	0.000232416	-0.184857	0.220393	1.32e-32	1.08e-45	1.32e-32	-11.8916	14.1896	4636	4670	0.000169136	0.000229222	0.000199179	-0.116525	0.135765	1.71e-29	2.27e-39	1.71e-29	-11.2773	13.1289	4816	4839
AATATCAT	ATGATATT	0.000111562	0.000127889	0.000119726	-0.0295709	0.0316107	2.67e-19	6.81e-22	2.67e-19	-8.98195	9.61685	6412	6428	0.000640672	0.000587345	0.000614008	-0.282053	0.272121	9.37e-105	3.41e-96	3.41e-96	-21.7395	20.8145	6646	6620	0.00023681	0.000371918	0.000304364	-0.11475	0.144924	1.29e-40	8.92e-63	1.29e-40	-13.3444	16.7245	6960	6921
AATATCCA	TGGATATT	0.00014795	0.000367124	0.000257537	-0.0333485	0.0451526	4.49e-25	1.08e-59	4.49e-25	-10.3437	16.2957	6424	8733	0.00159941	0.00183295	0.00171618	-0.454861	0.493362	1.33e-258	4.44e-296	1.33e-258	-34.3653	36.7931	6316	6308	0.000428518	0.00057213	0.000500324	-0.15815	0.185128	4.74e-72	1.44e-95	4.74e-72	-17.9526	20.7453	6561	6548
AATATCCC	GGGATATT	2.43e-05	4.6e-05	3.51e-05	-0.0193411	0.0264667	2.8e-05	8e-09	2.8e-05	-4.18908	5.76853	3274	3295	0.000447272	0.000369871	0.000408571	-0.338804	0.306213	1.06e-73	2.9e-61	2.9e-61	-18.1625	16.5157	3284	3292	0.000360896	0.000350334	0.000355615	-0.205233	0.200836	5.71e-61	3.08e-59	3.08e-59	-16.4747	16.2318	3375	3395
AATATGGT	ACCATATT	0.000175752	0.000170575	0.000173163	0.0412435	-0.0402664	1.77e-29	1.17e-28	1.17e-28	11.2739	-11.1066	5241	5290	1.55e-05	1.46e-05	1.5e-05	0.0488607	-0.0471738	0.000711275	0.00105601	0.00105601	3.38521	-3.27518	5503	5478	7.96e-05	0.000111479	9.56e-05	0.0746253	-0.0878781	1.02e-14	5.44e-20	1.02e-14	7.73737	-9.15526	5660	5667
AATATTAA	TTAATATT	4.74e-05	2.56e-05	3.65e-05	-0.0146054	0.0108048	4.84e-09	1.66e-05	1.66e-05	-5.85253	4.30647	10730	10667	0.000444684	0.000297168	0.000370926	-0.169766	0.140657	2.77e-73	1.42e-49	1.42e-49	-18.1098	14.8033	12125	11907	0.000204295	0.000207392	0.000205843	-0.0763968	0.0779778	2.83e-35	8.76e-36	2.83e-35	-12.3943	12.4879	12854	12642
AATATTCA	TGAATATT	3.91e-05	5.72e-05	4.81e-05	-0.0150246	0.0182398	1.07e-07	1.29e-10	1.07e-07	-5.31458	6.4286	8557	8512	0.000448938	0.000589013	0.000518976	-0.201626	0.232432	5.73e-74	1.84e-96	5.73e-74	-18.1963	20.8441	9058	8917	0.000249686	0.000286189	0.000267938	-0.100605	0.108522	9.92e-43	1.02e-48	9.92e-43	-13.7025	14.6703	9478	9307
AATATTGG	CCAATATT	3.23e-06	2.32e-05	1.32e-05	0.00606867	-0.0160494	0.126658	4.19e-05	0.126658	1.52742	-4.09673	4428	4531	0.000583742	0.000469762	0.000526752	0.326617	-0.290049	1.29e-95	2.59e-77	2.59e-77	20.7506	-18.6137	4610	4662	0.000241717	0.000224838	0.000233277	0.141427	-0.134518	2.02e-41	1.19e-38	1.19e-38	13.482	-13.0027	4769	4862
AATCAAAA	TTTTGATT	0.000477207	0.000536743	0.000506975	-0.0462836	0.0482806	4.87e-77	2.04e-86	4.87e-77	-18.58	19.7055	10702	11059	0.00203593	0.00210576	0.00207085	-0.386028	0.386956	0	0	0	-38.7808	39.4416	10954	11265	0.00129564	0.00117542	0.00123553	-0.205877	0.193062	5.71e-214	2.68e-194	2.68e-194	-31.2301	29.7441	11465	11813
AATCAAAC	GTTTGATT	0.000147815	0.000122727	0.000135271	-0.0412265	0.0370761	4.71e-25	4.49e-21	4.49e-21	-10.339	9.42072	4411	4480	0.000762832	0.000780515	0.000771674	-0.382583	0.3848	2.32e-124	3.36e-127	2.32e-124	-23.7232	23.9968	4396	4418	0.000678572	0.000493795	0.000586183	-0.241927	0.205604	5.41e-113	9.64e-83	9.64e-83	-22.5941	19.2721	4578	4593
AATCAAAG	CTTTGATT	6.61e-05	6.88e-05	6.75e-05	-0.0247116	0.0249751	4.74e-12	1.74e-12	4.74e-12	-6.91317	7.05396	5454	5540	0.000228601	0.000283324	0.000255963	-0.185983	0.205624	1.54e-38	2.39e-47	1.54e-38	-12.9832	14.4543	5549	5586	0.000124453	0.000165998	0.000145225	-0.0922839	0.10588	3.92e-22	5.61e-29	3.92e-22	-9.67337	11.1721	5740	5782
AATCAAAT	ATTTGATT	0.000182118	0.000180229	0.000181174	-0.0334301	0.0328764	1.74e-30	3.47e-30	3.47e-30	-11.4764	11.4167	7910	8168	0.00138767	0.00144121	0.00141444	-0.372598	0.37761	1.27e-224	3.25e-233	1.27e-224	-32.0064	32.6189	8184	8381	0.000864391	0.000894322	0.000879357	-0.196432	0.198911	2.1e-143	2.66e-148	2.1e-143	-25.503	25.9412	8590	8776
AATCAACA	TGTTGATT	0.000255123	0.000258757	0.00025694	-0.0471841	0.0473225	5.06e-42	1.35e-42	5.06e-42	-13.5837	13.6801	5696	5790	0.0018191	0.00256256	0.00219083	-0.518949	0.616388	7.41e-294	0	7.41e-294	-36.6536	43.5198	5593	5641	0.00117845	0.00139704	0.00128774	-0.278	0.302824	8.58e-195	1.46e-230	8.58e-195	-29.7824	32.4307	5918	5963
AATCAACC	NA	0.000101828	NA	0.000101828	-0.0415184	NA	9.42e-18	NA	9.42e-18	-8.58109	NA	2824	NA	0.000225104	NA	0.000225104	-0.249877	NA	5.63e-38	NA	5.63e-38	-12.8835	NA	2871	NA	8.14e-05	NA	8.14e-05	-0.101517	NA	5.25e-15	NA	5.25e-15	-7.82085	NA	2947	NA
AATCAAGA	TCTTGATT	0.000159988	8.11e-05	0.000120564	-0.0381587	0.0265219	5.56e-27	1.86e-14	1.86e-14	-10.7564	7.65988	5512	5793	0.000452611	0.000609765	0.000531188	-0.259671	0.295008	1.47e-74	8.57e-100	1.47e-74	-18.2706	21.2083	5608	5865	0.000256278	0.000296323	0.0002763	-0.131319	0.13835	8.22e-44	2.21e-50	8.22e-44	-13.8823	14.9278	5813	6073
AATCAATA	TATTGATT	0.000565256	0.000605137	0.000585197	-0.0604276	0.0612392	6.59e-91	3.46e-97	6.59e-91	-20.2224	20.9241	7433	7697	0.00535419	0.00562727	0.00549073	-0.750229	0.75634	0	0	0	-62.9948	64.5902	7595	7822	0.00232319	0.00243818	0.00238068	-0.329602	0.332921	0	0	0	-41.8405	42.8659	7999	8196
AATCAATG	CATTGATT	0.000255775	0.000299054	0.000277415	-0.0483335	0.0517715	4e-42	5.9e-49	4e-42	-13.601	14.7071	5506	5586	0.00177245	0.00213522	0.00195384	-0.519237	0.564147	2.27e-286	0	2.27e-286	-36.1797	39.7171	5518	5599	0.00107632	0.00109003	0.00108317	-0.271319	0.270668	4.41e-178	2.52e-180	4.41e-178	-28.4612	28.6421	5734	5818
AATCACAA	TTGTGATT	0.000337395	0.000286264	0.000311829	-0.0519549	0.0477367	5.28e-55	6.15e-47	6.15e-47	-15.6218	14.3891	6244	6301	0.00139675	0.00157792	0.00148734	-0.426741	0.454065	4.42e-226	3.76e-255	4.42e-226	-32.1111	34.1332	6371	6384	0.0010375	0.000966229	0.00100186	-0.247645	0.239219	9.92e-172	4.55e-160	4.55e-160	-27.9427	26.9649	6587	6589
AATCACCA	TGGTGATT	2.27e-05	3.01e-05	2.64e-05	-0.0161042	0.0181413	5.1e-05	3.1e-06	5.1e-05	-4.05103	4.66395	4427	4583	0.000173576	0.000144403	0.00015899	-0.180103	0.162652	1.14e-29	5.84e-25	5.84e-25	-11.3129	10.3184	4510	4568	0.000113127	7.93e-05	9.62e-05	-0.0986009	0.0816828	2.91e-20	1.14e-14	1.14e-14	-9.22267	7.72219	4595	4651
AATCACTA	NA	5.34e-05	NA	5.34e-05	-0.0275236	NA	5.17e-10	NA	5.17e-10	-6.21396	NA	3518	NA	0.00013469	NA	0.00013469	-0.176698	NA	2.17e-23	NA	2.17e-23	-9.96529	NA	3594	NA	9.38e-05	NA	9.38e-05	-0.0987615	NA	4.57e-17	NA	4.57e-17	-8.39756	NA	3742	NA
AATCAGAA	TTCTGATT	7.57e-05	5.69e-05	6.63e-05	-0.0216224	0.0187199	1.38e-13	1.44e-10	1.44e-10	-7.39815	6.4117	8067	8052	0.000272809	0.000346134	0.000309471	-0.166203	0.18665	1.18e-45	1.9e-57	1.18e-45	-14.1834	15.9768	8201	8220	0.000207954	0.000304188	0.000256071	-0.0977825	0.117723	7.08e-36	1.13e-51	7.08e-36	-12.5048	15.1247	8449	8507
AATCAGAG	NA	7.09e-05	NA	7.09e-05	-0.0255703	NA	7.93e-13	NA	7.93e-13	-7.16257	NA	5438	NA	0.000469361	NA	0.000469361	-0.26878	NA	3.01e-77	NA	3.01e-77	-18.6058	NA	5426	NA	0.000219704	NA	0.000219704	-0.124888	NA	8.31e-38	NA	8.31e-38	-12.8533	NA	5549	NA
AATCAGGC	GCCTGATT	8.21e-05	8.96e-05	8.59e-05	-0.035964	0.0380953	1.32e-14	8.21e-16	1.32e-14	-7.70419	8.05124	3189	3127	0.000327695	0.000343164	0.00033543	-0.292276	0.3029	1.75e-54	5.69e-57	1.75e-54	-15.5453	15.9081	3214	3154	0.000296596	0.000268828	0.000282712	-0.189382	0.182994	1.99e-50	7.16e-46	7.16e-46	-14.9347	14.2182	3246	3171
AATCAGTA	TACTGATT	0.000122568	0.000148646	0.000135607	-0.0374019	0.0402746	4.76e-21	3.48e-25	4.76e-21	-9.41461	10.368	4383	4587	0.000407927	0.000463026	0.000435476	-0.274364	0.287902	2.22e-67	3.13e-76	2.22e-67	-17.3449	18.4797	4510	4667	0.000344653	0.000285454	0.000315054	-0.168746	0.151689	2.63e-58	1.34e-48	1.34e-48	-16.0996	14.6514	4716	4843
AATCATAA	TTATGATT	6.29e-05	5.37e-05	5.83e-05	-0.0237699	0.0220906	1.55e-11	4.65e-10	4.65e-10	-6.7429	6.23043	5488	5530	0.000217795	0.000310341	0.000264068	-0.175695	0.211439	8.47e-37	1.08e-51	8.47e-37	-12.6725	15.1279	5780	5793	0.000299949	0.000301351	0.00030065	-0.13795	0.139073	5.62e-51	3.31e-51	5.62e-51	-15.0189	15.054	6050	6083
AATCATAC	NA	3.29e-05	NA	3.29e-05	-0.0228908	NA	1.06e-06	NA	1.06e-06	-4.8805	NA	3104	NA	0.000124153	NA	0.000124153	-0.179213	NA	1.1e-21	NA	1.1e-21	-9.56748	NA	3185	NA	0.000105985	NA	0.000105985	-0.111066	NA	4.4e-19	NA	4.4e-19	-8.92678	NA	3315	NA
AATCATGA	TCATGATT	8.31e-05	0.000152984	0.000118037	-0.0286888	0.038637	9.1e-15	7.15e-26	9.1e-15	-7.75138	10.5183	5080	5155	0.000595547	0.000739345	0.000667446	-0.310867	0.345428	1.64e-97	1.36e-120	1.64e-97	-20.9594	23.3548	5179	5207	0.000312372	0.000285616	0.000298994	-0.152143	0.145096	5.15e-53	1.26e-48	1.26e-48	-15.3269	14.6556	5309	5340
AATCATGC	GCATGATT	6.16e-05	6.09e-05	6.12e-05	-0.0283182	0.0281731	2.53e-11	3.21e-11	3.21e-11	-6.67174	6.63682	3908	3891	0.00040509	0.000280062	0.000342576	-0.296161	0.244383	6.35e-67	8.01e-47	8.01e-47	-17.2845	14.3708	3913	3871	0.000233937	0.000126238	0.000180087	-0.152611	0.111068	3.82e-40	1.99e-22	1.99e-22	-13.2632	9.74252	3987	3960
AATCATGT	ACATGATT	0.000113463	0.000104614	0.000109039	0.0325716	-0.0309155	1.33e-19	3.39e-18	3.39e-18	9.05815	-8.69773	5429	5562	0.000639526	0.000567547	0.000603536	0.312047	-0.290295	1.43e-104	5.14e-93	5.14e-93	21.72	-20.4605	5567	5693	0.000480684	0.000582967	0.000531826	0.182254	-0.198784	1.35e-80	2.42e-97	1.35e-80	19.0144	-20.941	5730	5844
AATCCAAA	TTTGGATT	0.000113996	0.000101831	0.000107914	-0.0287147	0.0274478	1.09e-19	9.4e-18	9.4e-18	-9.07941	8.58124	6658	6543	0.000412186	0.000387801	0.000399994	-0.220729	0.216047	4.6e-68	3.81e-64	3.81e-64	-17.4353	16.9115	6798	6702	0.000475375	0.000350521	0.000412948	-0.159501	0.138018	1e-79	2.87e-59	2.87e-59	-18.9091	16.2361	7026	6946
AATCCAAC	GTTGGATT	0.000120217	0.000133905	0.000127061	-0.0434842	0.0464144	1.12e-20	7.56e-23	1.12e-20	-9.3239	9.84045	3192	3145	0.00134969	0.00155499	0.00145234	-0.59452	0.643575	1.57e-218	1.8e-251	1.57e-218	-31.5648	33.8839	3193	3161	0.000604432	0.000714516	0.000659474	-0.267584	0.294613	7.4e-101	7.08e-119	7.4e-101	-21.3233	23.1852	3297	3248
AATCCACA	TGTGGATT	6.98e-05	8.55e-05	7.77e-05	-0.0282199	0.0314696	1.2e-12	3.7e-15	1.2e-12	-7.10603	7.86501	4324	4323	0.000345808	0.000379148	0.000362478	-0.254012	0.269801	2.14e-57	9.36e-63	2.14e-57	-15.9693	16.7217	4387	4348	0.000252117	0.000306655	0.000279386	-0.146601	0.163842	3.96e-43	4.46e-52	3.96e-43	-13.7691	15.1859	4500	4467
AATCCACC	GGTGGATT	0.000108357	0.000142405	0.000125381	-0.0406209	0.0461332	8.62e-19	3.39e-24	8.62e-19	-8.85197	10.148	3344	3405	0.000120785	0.000118196	0.00011949	-0.173466	0.169831	3.85e-21	1.01e-20	1.01e-20	-9.43679	9.33509	3408	3474	0.000126012	9.5e-05	0.000110525	-0.120734	0.103796	2.17e-22	2.84e-17	2.84e-17	-9.73379	8.45316	3438	3503
AATCCAGA	NA	5.67e-05	NA	5.67e-05	-0.0236127	NA	1.54e-10	NA	1.54e-10	-6.4014	NA	5075	NA	0.000215106	NA	0.000215106	-0.185827	NA	2.3e-36	NA	2.3e-36	-12.594	NA	5111	NA	0.00015224	NA	0.00015224	-0.105937	NA	1.03e-26	NA	1.03e-26	-10.6991	NA	5212	NA
AATCCAGC	GCTGGATT	4.15e-05	3.92e-05	4.03e-05	-0.0208414	0.0200425	4.37e-08	1e-07	1e-07	-5.47537	5.32613	4428	4501	0.0011309	0.00112303	0.00112696	-0.442505	0.437057	2.01e-183	3.68e-182	3.68e-182	-28.8901	28.7893	4472	4529	0.000902327	0.000842107	0.000872217	-0.269292	0.256963	1.3e-149	9.31e-140	9.31e-140	-26.0572	25.1719	4514	4604
AATCCAGG	CCTGGATT	6.19e-06	4.46e-06	5.32e-06	-0.0077467	0.00650232	0.0343888	0.0726053	0.0726053	-2.11549	1.79531	5195	5323	0.000538666	0.000562633	0.000550649	-0.2932	0.297709	2.23e-88	3.16e-92	2.23e-88	-19.9328	20.3717	5255	5344	0.00036666	0.00037443	0.000370545	-0.164351	0.164651	6.49e-62	3.46e-63	6.49e-62	-16.6058	16.7809	5334	5442
AATCCCAA	TTGGGATT	0.000151273	0.000175126	0.0001632	0.0331163	-0.0358324	1.33e-25	2.23e-29	1.33e-25	10.4593	-11.2539	6900	6835	0.000152281	0.000176939	0.00016461	-0.13416	0.144949	3.12e-26	3.27e-30	3.12e-26	-10.5962	11.422	7054	7017	4.62e-05	5.79e-05	5.21e-05	-0.0501711	0.0563764	3.8e-09	4.14e-11	3.8e-09	-5.89275	6.59892	7163	7115
AATCCCAG	CTGGGATT	0.0110086	0.011703	0.0113558	0.106041	-0.108775	0	0	0	89.7133	-92.5323	37731	37961	9.47e-05	7.87e-05	8.67e-05	-0.0393401	0.0357236	6.61e-17	2.56e-14	2.56e-14	-8.35408	7.61902	39295	39520	0.000997274	0.00105048	0.00102388	0.0873331	-0.0892366	3.78e-165	7.45e-174	3.78e-165	27.3951	-28.1171	39323	39568
AATCCTAA	TTAGGATT	0.000277829	0.000295024	0.000286427	-0.0518857	0.0525557	1.32e-45	2.55e-48	1.32e-45	-14.1755	14.6077	5159	5334	0.00331462	0.00314501	0.00322981	-0.731363	0.702098	0	0	0	-49.5143	48.2267	5162	5305	0.000616061	0.000608872	0.000612466	-0.211455	0.206809	9.23e-103	1.39e-101	1.39e-101	-21.5276	21.4015	5380	5553
AATCCTAG	CTAGGATT	0.000273857	0.000266397	0.000270127	0.0475569	-0.0455124	5.59e-45	8.4e-44	8.4e-44	14.0737	-13.8807	6114	6150	0.000545233	0.000418311	0.000481772	-0.27023	0.229948	1.97e-89	4.77e-69	4.77e-69	-20.054	17.5644	6277	6310	5.43e-05	3.01e-05	4.22e-05	-0.0579473	0.041914	1.65e-10	1.98e-06	1.98e-06	-6.3906	4.75568	6372	6404
AATCCTCA	TGAGGATT	9.39e-05	3.34e-05	6.36e-05	-0.028294	0.0163597	1.72e-16	9.03e-07	9.03e-07	-8.2406	4.91179	5954	6318	0.00077046	0.0008693	0.00081988	-0.335019	0.36198	1.38e-125	1.9e-141	1.38e-125	-23.8416	25.326	5796	5576	0.000551303	0.000711619	0.000631461	-0.192073	0.222223	3.69e-92	2.11e-118	3.69e-92	-20.364	23.1381	5909	5675
AATCCTCC	GGAGGATT	0.000442301	0.000403324	0.000422813	-0.0587481	0.0552589	1.54e-71	2.13e-65	2.13e-65	-17.8872	17.0806	6299	6407	0.000195728	0.000221067	0.000208397	-0.156933	0.164161	3.05e-33	2.52e-37	3.05e-33	-12.0133	12.7674	6505	6618	3.64e-05	4.26e-05	3.95e-05	-0.0462342	0.0492076	1.66e-07	1.49e-08	1.66e-07	-5.23395	5.66228	6536	6654
AATCTACA	TGTAGATT	9.72e-05	0.000154583	0.000125883	-0.0317417	0.0384083	5.17e-17	3.99e-26	5.17e-17	-8.38307	10.5731	4828	5218	0.00230261	0.00234719	0.0023249	-0.632942	0.632542	0	0	0	-41.248	41.6463	4790	4865	0.00050691	0.000461241	0.000484075	-0.199333	0.187374	6.86e-85	2.07e-77	2.07e-77	-19.5265	18.6257	4983	5101
AATCTAGA	TCTAGATT	3.61e-05	5.27e-05	4.44e-05	-0.0200893	0.0246684	3.28e-07	6.61e-10	3.28e-07	-5.10654	6.17517	4475	4389	0.000955419	0.00079162	0.00087352	-0.428187	0.387915	2.89e-155	5.56e-129	5.56e-129	-26.552	24.167	4336	4415	0.000278073	0.000338548	0.000308311	-0.15531	0.17066	2.18e-47	2.63e-57	2.18e-47	-14.4607	15.9563	4492	4570
AATCTCCT	AGGAGATT	0.000203935	0.000174025	0.00018898	-0.0413578	0.0382821	6.19e-34	3.33e-29	3.33e-29	-12.1444	11.2184	6066	6038	0.000304189	0.000296212	0.000300201	-0.204059	0.201606	1.05e-50	2.02e-49	2.02e-49	-14.9772	14.7794	6183	6174	0.000373321	0.000354108	0.000363714	-0.15394	0.150268	5.25e-63	7.4e-60	7.4e-60	-16.756	16.319	6246	6217
AATCTCGG	CCGAGATT	0.00127878	0.00142673	0.00135275	-0.147748	0.15552	3.22e-203	1.67e-226	3.22e-203	-30.4272	32.1417	2991	3009	1.02e-05	6.33e-06	8.25e-06	0.0525028	-0.0411282	0.00618334	0.0307248	0.0307248	2.7379	-2.16062	3138	3179	7.66e-05	5.98e-05	6.82e-05	-0.0986698	0.086395	3.23e-14	2.05e-11	2.05e-11	-7.58903	6.70248	3135	3184
AATCTGGG	CCCAGATT	3.31e-05	6.94e-05	5.12e-05	0.0187387	-0.0272061	1.01e-06	1.4e-12	1.01e-06	4.89054	-7.08434	4796	4704	0.000739214	0.000698986	0.0007191	0.360254	-0.350038	1.43e-120	4.09e-114	4.09e-114	23.3528	-22.708	4827	4765	0.000242475	0.000220319	0.000231397	0.139913	-0.133371	1.52e-41	6.59e-38	6.59e-38	13.5032	-12.8713	4918	4848
AATCTTGG	CCAAGATT	0.000378963	0.000281554	0.000330259	-0.0577081	0.0493628	1.48e-61	3.41e-46	3.41e-46	-16.5565	14.2702	5781	5875	6.36e-05	6.6e-05	6.48e-05	0.0954585	-0.0961588	7.45e-12	3.09e-12	7.45e-12	6.84894	-6.97363	5910	6047	3.27e-06	5.19e-06	4.23e-06	0.0147087	-0.018353	0.116674	0.0481496	0.116674	1.56889	-1.97605	6001	6123
AATGAAAA	TTTTCATT	0.000204254	0.000238203	0.000221228	-0.0241229	0.0253942	5.51e-34	2.38e-39	5.51e-34	-12.1539	13.1254	16799	17787	0.000666007	0.00069303	0.000679518	-0.174579	0.177667	8.04e-109	3.7e-113	8.04e-109	-22.1654	22.611	17487	17513	0.000540804	0.000552526	0.000546665	-0.105016	0.105851	1.93e-90	2.33e-92	1.93e-90	-20.1691	20.3866	18363	18375
AATGAAAC	GTTTCATT	3.46e-05	6.9e-05	5.18e-05	-0.0158882	0.0220419	5.66e-07	1.61e-12	5.66e-07	-5.00248	7.06452	6826	7001	0.000552098	0.000599706	0.000575902	-0.25814	0.263643	1.55e-90	3.53e-98	1.55e-90	-20.18	21.0325	6904	7058	0.00027631	0.000240073	0.000258192	-0.122326	0.112192	4.24e-47	3.76e-41	3.76e-41	-14.4148	13.4361	7189	7307
AATGAAAT	ATTTCATT	0.000191187	0.000224906	0.000208047	-0.0234454	0.0257053	6.41e-32	3e-37	6.41e-32	-11.7587	12.7537	13271	13426	0.00067276	0.000729007	0.000700883	-0.194511	0.204128	6.62e-110	6.22e-119	6.62e-110	-22.2776	23.1908	13679	13747	0.000218875	0.000235184	0.00022703	-0.0734754	0.0773676	1.14e-37	2.39e-40	1.14e-37	-12.8291	13.2985	14322	14402
AATGAACA	TGTTCATT	4.03e-05	5.94e-06	2.31e-05	-0.0159112	0.00603074	6.86e-08	0.0382314	0.0382314	-5.39499	2.07237	7945	8202	0.000242279	0.000197763	0.000220021	-0.157802	0.141207	9.65e-41	1.43e-33	1.43e-33	-13.366	12.0756	8103	8320	9.83e-05	8.32e-05	9.08e-05	-0.067645	0.0616516	8.05e-18	2.56e-15	2.56e-15	-8.59914	7.91064	8372	8601
AATGACAA	TTGTCATT	7.08e-05	0.000114005	9.24e-05	-0.0228634	0.0282873	8.51e-13	1.09e-19	8.51e-13	-7.15285	9.07976	6795	7109	0.000280215	0.000328282	0.000304248	-0.183232	0.193372	7.57e-47	1.41e-54	7.57e-47	-14.3747	15.5592	6972	7300	0.000224872	0.000209217	0.000217044	-0.110403	0.103906	1.18e-38	4.39e-36	4.39e-36	-13.0037	12.5428	7224	7557
AATGACAC	GTGTCATT	7.13e-05	3.67e-05	5.4e-05	-0.0308489	0.022472	7.04e-13	2.56e-07	2.56e-07	-7.17879	5.15346	3761	3690	0.00012138	0.000183484	0.000152432	-0.162849	0.202982	3.09e-21	2.87e-31	3.09e-21	-9.46003	11.6314	3827	3758	9.17e-05	9.81e-05	9.49e-05	-0.0956082	0.100369	1e-16	8.98e-18	1e-16	-8.30487	8.58657	3933	3849
AATGAGAA	TTCTCATT	0.000150774	0.000141071	0.000145923	-0.0255595	0.0246825	1.6e-25	5.52e-24	5.52e-24	-10.442	10.1004	11588	11609	0.000532211	0.00045331	0.000492761	-0.193667	0.17899	2.42e-87	1.14e-74	1.14e-74	-19.813	18.2847	11873	11816	0.000281801	0.000277647	0.000279724	-0.0949592	0.0944886	5.33e-48	2.56e-47	2.56e-47	-14.5573	14.4496	12234	12176
AATGAGAT	NA	8.05e-05	NA	8.05e-05	-0.0204595	NA	2.33e-14	NA	2.33e-14	-7.6311	NA	9211	NA	0.000384707	NA	0.000384707	-0.185033	NA	1.2e-63	NA	1.2e-63	-16.8438	NA	9369	NA	0.000135521	NA	0.000135521	-0.074154	NA	5.87e-24	NA	5.87e-24	-10.0944	NA	9623	NA
AATGATAA	TTATCATT	3.6e-05	5.88e-05	4.74e-05	-0.0150232	0.0192164	3.34e-07	6.93e-11	3.34e-07	-5.10319	6.52219	7888	7813	0.000608128	0.000539392	0.00057376	-0.247642	0.234081	1.57e-99	1.7e-88	1.7e-88	-21.1798	19.9463	8174	8051	0.000261898	0.000277333	0.000269615	-0.108708	0.111995	9.82e-45	2.88e-47	9.82e-45	-14.0337	14.4414	8545	8462
AATGCAAA	TTTGCATT	0.000150914	0.000100434	0.000125674	-0.025504	0.0200348	1.52e-25	1.57e-17	1.57e-17	-10.4468	8.52218	11545	12397	0.00138291	0.00137251	0.00137771	-0.313503	0.307043	7.36e-224	3.43e-222	3.43e-222	-31.9514	31.8309	11665	12012	0.000811447	0.000618953	0.0007152	-0.161521	0.138732	9.69e-135	3.1e-103	3.1e-103	-24.709	21.5781	12087	12429
AATGCAAT	ATTGCATT	0.000177475	0.000138472	0.000157973	-0.0379004	0.0324582	9.47e-30	1.43e-23	1.43e-23	-11.3291	10.0069	5966	6515	0.000273226	0.000309092	0.000291159	-0.190064	0.204872	1.01e-45	1.71e-51	1.01e-45	-14.1943	15.0974	6097	6073	0.000142928	0.000178108	0.000160518	-0.0921319	0.104242	3.53e-25	5.71e-31	3.53e-25	-10.3667	11.5726	6370	6328
AATGCAGT	NA	0.000127703	NA	0.000127703	-0.0331368	NA	7.29e-22	NA	7.29e-22	-9.60985	NA	5911	NA	1.69e-08	NA	1.69e-08	-0.00153918	NA	0.911031	NA	0.911031	-0.111739	NA	6054	NA	1.02e-07	NA	1.02e-07	-0.0025577	NA	0.781737	NA	0.781737	-0.277057	NA	6190	NA
AATGCCCA	TGGGCATT	8.47e-05	8.48e-05	8.48e-05	-0.029123	0.0294167	5.04e-15	4.81e-15	5.04e-15	-7.82612	7.83205	5065	4976	0.00102977	0.00100128	0.00101552	-0.416907	0.41469	3.39e-167	1.26e-162	1.26e-162	-27.5668	27.1823	4998	4918	0.0004883	0.000529859	0.00050908	-0.194222	0.203748	7.66e-82	1.2e-88	7.66e-82	-19.1645	19.9639	5117	5052
AATGCCCC	GGGGCATT	3.11e-06	2.16e-06	2.64e-06	-0.00798691	0.00653745	0.13352	0.211163	0.211163	-1.50037	1.25038	2461	2568	0.000176436	0.000262571	0.000219503	-0.245378	0.293382	3.94e-30	5.23e-44	3.94e-30	-11.4058	13.9147	2461	2579	0.000107702	9.4e-05	0.00010083	-0.13079	0.119813	2.29e-19	4.29e-17	4.29e-17	-8.99878	8.40502	2477	2592
AATGCTCA	TGAGCATT	2.71e-05	4.37e-05	3.54e-05	-0.0161008	0.0203849	9.54e-06	1.88e-08	9.54e-06	-4.42747	5.62262	5306	5339	0.000626219	0.000605603	0.000615911	-0.315213	0.307584	1.96e-102	3.99e-99	3.99e-99	-21.4927	21.1358	5329	5405	0.000155739	0.000129578	0.000142658	-0.10622	0.0962688	2.74e-27	5.6e-23	5.6e-23	-10.8213	9.87059	5469	5529
AATGCTCC	NA	1.6e-05	NA	1.6e-05	-0.0159099	NA	0.000677242	NA	0.000677242	-3.39864	NA	3191	NA	0.000556006	NA	0.000556006	-0.38658	NA	3.66e-91	NA	3.66e-91	-20.2513	NA	3132	NA	0.000302007	NA	0.000302007	-0.193866	NA	2.58e-51	NA	2.58e-51	-15.0703	NA	3166	NA
AATGCTTG	CAAGCATT	0.000195827	0.000169061	0.000182444	0.0462332	-0.0433435	1.18e-32	2.03e-28	2.03e-28	11.9005	-11.0572	4630	4546	0.000609914	0.000538974	0.000574444	0.328599	-0.310265	8.12e-100	1.99e-88	1.99e-88	21.2109	-19.9385	4754	4688	0.000457258	0.000379455	0.000418357	0.192979	-0.176835	9.29e-77	5.19e-64	5.19e-64	18.5451	-16.8932	4842	4784
AATGGAAA	TTTCCATT	0.00015559	0.000169177	0.000162384	-0.0246892	0.0260178	2.76e-26	1.95e-28	2.76e-26	-10.6075	11.061	12601	12362	0.00131804	0.0014235	0.00137077	-0.293081	0.307257	1.89e-213	2.26e-230	1.89e-213	-31.192	32.4175	12665	12446	0.000351485	0.000423463	0.000387474	-0.101464	0.112454	1.99e-59	3.19e-71	1.99e-59	-16.2584	17.8463	13168	12925
AATGGAAC	GTTCCATT	0.000116714	0.000130171	0.000123442	-0.0341991	0.0367199	4.05e-20	2.96e-22	4.05e-20	-9.187	9.70228	4948	4896	0.00424526	0.00380776	0.00402651	-0.84763	0.816124	0	0	0	-56.062	53.083	4864	4827	0.000334188	0.000293448	0.000313818	-0.159971	0.151997	1.36e-56	6.54e-50	6.54e-50	-15.8532	14.8552	5051	5024
AATGGCAA	TTGCCATT	8.86e-05	9.81e-05	9.34e-05	-0.0261171	0.0276098	1.2e-15	3.64e-17	1.2e-15	-8.00509	8.42405	6580	6472	0.00170818	0.00141231	0.00156024	-0.467236	0.425837	4.7e-276	1.41e-228	1.41e-228	-35.5165	32.2897	6594	6513	0.00039755	0.000300811	0.000349181	-0.152423	0.132658	5.62e-67	4.06e-51	4.06e-51	-17.2915	15.0405	6758	6701
AATGGCAC	GTGCCATT	0.000310958	0.000314234	0.000312596	-0.0596959	0.0606524	7.81e-51	2.38e-51	7.81e-51	-14.9971	15.0759	4428	4339	1.19e-06	1.92e-06	1.55e-06	-0.0148042	0.0190619	0.349273	0.234168	0.349273	-0.936002	1.18969	4539	4446	6.03e-06	4.18e-06	5.1e-06	-0.0226886	0.0191418	0.0332226	0.0764373	0.0764373	-2.12939	1.77174	4595	4492
AATGGCCA	TGGCCATT	0.000172993	0.000149493	0.000161243	-0.0401247	0.0368743	4.85e-29	2.55e-25	2.55e-25	-11.1851	10.3976	5361	5457	0.0021003	0.00234407	0.00222218	-0.569991	0.59909	0	0	0	-39.3903	41.6186	5381	5402	0.00034486	0.000304075	0.000324468	-0.156158	0.145905	2.43e-58	1.18e-51	1.18e-51	-16.1044	15.1219	5509	5539
AATGGCGC	GCGCCATT	0.000580072	0.000501742	0.000540907	-0.145526	0.132907	3.06e-93	6.64e-81	6.64e-81	-20.4859	19.0518	1386	1453	1.03e-05	1.25e-06	5.78e-06	0.0782243	-0.0264994	0.00580857	0.337676	0.337676	2.7584	-0.958768	1422	1513	1.02e-05	9.96e-06	1.01e-05	-0.0531573	0.0512556	0.00569455	0.00621303	0.00621303	-2.76488	2.73633	1421	1513
AATGGCGT	ACGCCATT	0.000848781	0.00117137	0.00101008	0.109831	-0.12978	1.52e-135	2.58e-186	1.52e-135	24.7839	-29.1199	3583	3556	2.27e-06	1.34e-07	1.2e-06	0.0225476	-0.00550853	0.195522	0.752986	0.752986	1.29442	-0.314704	3794	3769	0.000146351	0.000272586	0.000209468	0.123617	-0.170037	9.63e-26	1.73e-46	9.63e-26	10.4901	-14.3173	3807	3759
AATGGCTT	NA	2.28e-05	NA	2.28e-05	0.0141026	NA	4.99e-05	NA	4.99e-05	4.05601	NA	5791	NA	1.76e-05	NA	1.76e-05	0.0500336	NA	0.000320942	NA	0.000320942	3.5978	NA	5919	NA	1.28e-05	NA	1.28e-05	0.028935	NA	0.00193869	NA	0.00193869	3.09948	NA	6032	NA
AATGGTAT	ATACCATT	0.0001046	6.31e-05	8.39e-05	0.0308686	-0.0239769	3.41e-18	1.42e-11	1.42e-11	8.69712	-6.75584	5538	5539	0.00100537	0.00123971	0.00112254	0.386449	-0.428519	2.79e-163	6.99e-201	2.79e-163	27.2379	-30.2497	5640	5690	0.000301803	0.000351322	0.000326563	0.142782	-0.154172	2.79e-51	2.12e-59	2.79e-51	15.0653	-16.2547	5814	5841
AATGGTGC	GCACCATT	0.00061105	0.000580292	0.000595671	-0.0808239	0.0780703	4.05e-98	2.82e-93	2.82e-93	-21.0261	20.4898	4774	4826	0.00180639	0.00135163	0.00157901	-0.565125	0.486486	8.13e-292	7.69e-219	7.69e-219	-36.525	31.5875	4808	4821	0.000330988	0.000231725	0.000281356	-0.163781	0.136229	4.57e-56	8.82e-40	8.82e-40	-15.7771	13.2004	4914	4939
AATGTAAA	TTTACATT	0.000265221	0.000209228	0.000237224	-0.0327007	0.0291767	1.29e-43	9.01e-35	9.01e-35	-13.85	12.3011	12100	12006	0.00158848	0.00160692	0.0015977	-0.322715	0.325189	7.58e-257	8.34e-260	7.58e-257	-34.2475	34.446	12411	12407	0.000830548	0.00089502	0.000862784	-0.155516	0.162188	7.25e-138	2.04e-148	7.25e-138	-24.9984	25.9513	13067	13010
AATGTGGG	CCCACATT	1.47e-06	1e-05	5.76e-06	0.00400314	-0.0105075	0.301881	0.00702499	0.301881	1.03241	-2.69566	4622	4550	0.000152061	0.000156805	0.000154433	0.164903	-0.168311	3.38e-26	5.8e-27	3.38e-26	10.5885	-10.7524	4684	4613	8.99e-05	0.000107666	9.88e-05	0.0863117	-0.0947438	1.98e-16	2.32e-19	1.98e-16	8.22334	-8.9973	4738	4678
AATGTGTC	GACACATT	1.75e-05	2.73e-05	2.24e-05	0.0150022	-0.0183049	0.000377414	8.79e-06	0.000377414	3.55541	-4.44506	3925	4012	0.000457907	0.000389281	0.000423594	0.314591	-0.282694	2.08e-75	2.2e-64	2.2e-64	18.3772	-16.9437	3890	3993	0.000354604	0.000315868	0.000335236	0.185808	-0.171116	6.14e-60	1.38e-53	1.38e-53	16.3304	-15.4124	4048	4146
AATGTGTG	CACACATT	3.86e-05	3.14e-05	3.5e-05	0.0180734	-0.0164247	1.26e-07	1.92e-06	1.92e-06	5.28435	-4.76132	5850	5673	0.000289525	0.000254795	0.00027216	0.200114	-0.18805	2.41e-48	9.33e-43	9.33e-43	14.6116	-13.707	5962	5884	0.000271037	0.000204054	0.000237545	0.130678	-0.113984	3.11e-46	3.1e-35	3.1e-35	14.2765	-12.387	6135	6003
AATGTTGA	TCAACATT	5.89e-06	1.77e-05	1.18e-05	0.00702483	-0.0120575	0.0389696	0.000353046	0.0389696	2.06451	-3.57292	6029	6115	0.00156652	0.0011775	0.00137201	0.468088	-0.400007	2.54e-253	6.69e-191	6.69e-191	34.0095	-29.4801	6009	6172	0.000523401	0.000503092	0.000513246	0.180703	-0.174767	1.37e-87	2.89e-84	2.89e-84	19.8418	-19.4528	6309	6465
AATGTTGG	CCAACATT	4.75e-07	2.43e-06	1.45e-06	0.00223938	-0.00510254	0.557712	0.184668	0.557712	0.586243	-1.32652	4808	4725	0.000328848	0.000327605	0.000328226	0.238871	-0.240064	1.14e-54	1.81e-54	1.81e-54	15.5726	-15.5431	4867	4787	0.000134175	0.000165619	0.000149897	0.103294	-0.115363	9.78e-24	6.48e-29	9.78e-24	10.0442	-11.1594	4976	4911
AATTAAAA	TTTTAATT	0.000188319	0.000145947	0.000167133	-0.0205886	0.0180398	1.82e-31	9.32e-25	9.32e-25	-11.6701	10.2735	20559	20669	0.00202322	0.00194524	0.00198423	-0.261805	0.256049	0	4.21643424939665e-314	4.21643424939665e-314	-38.6592	37.9054	22398	22419	0.00144169	0.00141118	0.00142644	-0.1474	0.145279	7.21e-238	7.09e-233	7.09e-233	-32.9457	32.5947	23543	23567
AATTAAAC	GTTTAATT	8.14e-05	0.000100744	9.11e-05	-0.0233469	0.0258645	1.69e-14	1.4e-17	1.69e-14	-7.6724	8.53532	7534	7521	0.00193274	0.00198121	0.00195697	-0.456513	0.463295	4.28160388432147e-312	7.1007114620304e-320	4.28160388432147e-312	-37.7832	38.255	7767	7656	0.000765615	0.000626483	0.000696049	-0.192881	0.174527	3.07e-127	1.82e-104	1.82e-104	-24.0005	21.709	8077	7987
AATTAAAG	CTTTAATT	4.44e-05	3.84e-05	4.14e-05	-0.0179015	0.0164802	1.48e-08	1.36e-07	1.36e-07	-5.66395	5.27055	6905	7018	0.000155646	0.000191469	0.000173557	-0.133014	0.146363	8.92e-27	1.48e-32	8.92e-27	-10.7126	11.8818	7280	7394	0.000101855	8.73e-05	9.46e-05	-0.0718376	0.0662086	2.12e-18	5.48e-16	5.48e-16	-8.7511	8.10042	7647	7714
AATTAACA	TGTTAATT	7.53e-05	9.14e-05	8.33e-05	-0.023891	0.0262883	1.6e-13	4.37e-16	1.6e-13	-7.37878	8.12799	6532	6568	0.000370987	0.000478697	0.000424842	-0.21098	0.239276	1.92e-61	9.51e-79	1.92e-61	-16.5406	18.79	6899	6916	0.000286461	0.000362409	0.000324435	-0.124102	0.139173	9.16e-49	3.23e-61	9.16e-49	-14.6772	16.5093	7195	7243
AATTAATA	TATTAATT	3.97e-05	3.06e-05	3.52e-05	-0.0149986	0.0131696	8.4e-08	2.51e-06	2.51e-06	-5.35844	4.70729	8678	8686	0.000414418	0.000462977	0.000438698	-0.184892	0.196281	2.01e-68	3.19e-76	2.01e-68	-17.4824	18.4788	9760	9693	0.000242713	0.000299443	0.000271078	-0.094409	0.105089	1.38e-41	6.8e-51	1.38e-41	-13.5098	15.0062	10283	10242
AATTACAA	TTGTAATT	5.77e-05	7.58e-05	6.67e-05	-0.0205161	0.02349	1.06e-10	1.32e-13	1.06e-10	-6.45769	7.40394	6781	6834	0.000276154	0.000275373	0.000275764	-0.178214	0.177589	3.41e-46	4.55e-46	4.55e-46	-14.2701	14.2499	7171	7221	0.000144789	0.000179613	0.000162201	-0.0864654	0.096233	1.74e-25	3.23e-31	1.74e-25	-10.4339	11.6214	7472	7511
AATTACAG	CTGTAATT	0.00035929	0.000349977	0.000354634	-0.0508203	0.0502477	1.86e-58	5.48e-57	5.48e-57	-16.1209	15.9105	7016	6994	3.58e-06	8.51e-06	6.05e-06	-0.0202085	0.0313983	0.104339	0.0122459	0.104339	-1.62418	2.50498	7355	7260	3.56e-05	2.77e-05	3.17e-05	-0.0431474	0.0381915	2.26e-07	5.11e-06	5.11e-06	-5.17658	4.56006	7520	7468
AATTAGAA	TTCTAATT	7.76e-05	7.69e-05	7.73e-05	-0.0213224	0.0214123	6.74e-14	8.75e-14	8.75e-14	-7.49308	7.45872	8439	8271	0.000852794	0.000896919	0.000874856	-0.281732	0.291944	8.47e-139	7.03e-146	8.47e-139	-25.0842	25.7255	8838	8668	0.000659162	0.000684162	0.000671662	-0.165466	0.169736	8.13e-110	6.58e-114	8.13e-110	-22.2684	22.687	9261	9132
AATTAGCC	GGCTAATT	0.00732771	0.00750838	0.00741804	0.144452	-0.144933	0	0	0	73.0582	-73.9601	17935	18320	6.67e-05	4.29e-05	5.48e-05	-0.0549449	0.0436972	2.33e-12	1.84e-08	1.84e-08	-7.01351	5.62648	18833	19204	0.000361492	0.000421349	0.000391421	0.0874408	-0.093626	4.56e-61	7.09e-71	4.56e-61	16.4883	-17.8017	18858	19224
AATTAGCT	AGCTAATT	0.00351308	0.00350333	0.0035082	0.115568	-0.115833	0	0	0	50.4889	-50.4185	13361	13305	4.97e-06	2.38e-06	3.68e-06	-0.0173162	0.0120526	0.0555301	0.18494	0.18494	-1.91471	1.3257	14038	13946	0.000118511	0.000138902	0.000128706	0.0576008	-0.0626966	3.75e-21	1.63e-24	3.75e-21	9.43961	-10.2196	14162	14062
AATTATAA	TTATAATT	3.02e-05	4.98e-05	4e-05	-0.0125914	0.0162194	2.96e-06	1.96e-09	2.96e-06	-4.67338	6.00151	9341	9299	0.000184612	0.00022818	0.000206396	-0.118064	0.130455	1.89e-31	1.8e-38	1.89e-31	-11.6671	12.9712	10471	10470	0.000169215	0.000241707	0.000205461	-0.0747805	0.0891865	1.66e-29	2.03e-41	1.66e-29	-11.2799	13.4817	11155	11112
AATTATGT	ACATAATT	4.09e-06	3.18e-05	1.79e-05	0.00554675	-0.0154806	0.0855951	1.64e-06	0.0855951	1.71911	-4.79368	6701	6639	0.000556653	0.000321989	0.000439321	0.254187	-0.194722	2.88e-91	1.45e-53	1.45e-53	20.2631	-15.4093	7178	7065	0.000273231	0.00024633	0.00025978	0.118984	-0.113621	1.36e-46	3.53e-42	3.53e-42	14.3342	-13.6101	7530	7435
AATTCAAA	TTTGAATT	0.000127409	8.89e-05	0.00010816	-0.0256075	0.0211423	8.11e-22	1.07e-15	1.07e-15	-9.59877	8.01835	9518	9762	0.000614898	0.000742649	0.000678774	-0.224698	0.244621	1.29e-100	4.02e-121	1.29e-100	-21.2974	23.407	9906	10166	0.000469001	0.000452046	0.000460524	-0.131335	0.127845	1.11e-78	6.64e-76	6.64e-76	-18.7818	18.4391	10355	10610
AATTCAAC	GTTGAATT	0.000220287	0.000224078	0.000222183	-0.0453737	0.0444006	1.61e-36	4.05e-37	1.61e-36	-12.622	12.7302	5372	5662	0.00227519	0.00228628	0.00228074	-0.59757	0.583554	0	0	0	-41.0012	41.1012	5340	5587	0.00127752	0.00127976	0.00127864	-0.300992	0.292692	5.28e-211	2.27e-211	5.28e-211	-31.0106	31.0378	5544	5822
AATTCAAG	CTTGAATT	8.47e-05	0.000102001	9.34e-05	-0.0244882	0.0271145	4.97e-15	8.84e-18	4.97e-15	-7.82789	8.5884	7190	7029	0.00149649	0.00133977	0.00141813	-0.418702	0.398978	4.38e-242	6.14e-217	6.14e-217	-33.2395	31.4484	7231	7109	0.000390675	0.000432127	0.000411401	-0.14456	0.153403	7.52e-66	1.22e-72	7.52e-66	-17.1412	18.028	7421	7262
AATTCAAT	NA	4.97e-05	NA	4.97e-05	-0.0196354	NA	2.04e-09	NA	2.04e-09	-5.99484	NA	6328	NA	0.000150055	NA	0.000150055	-0.136357	NA	7.14e-26	NA	7.14e-26	-10.5184	NA	6580	NA	0.000128989	NA	0.000128989	-0.0845338	NA	7e-23	NA	7e-23	-9.84814	NA	6900	NA
AATTCACA	TGTGAATT	6.57e-05	8.58e-05	7.57e-05	-0.0225617	0.0253939	5.52e-12	3.35e-15	5.52e-12	-6.89154	7.87737	6408	6600	0.000899578	0.000850513	0.000875045	-0.33871	0.326536	2.63e-146	1.97e-138	1.97e-138	-25.7636	25.0506	6440	6612	0.000516353	0.000515447	0.0005159	-0.172649	0.170871	1.95e-86	2.74e-86	2.74e-86	-19.7076	19.6903	6654	6831
AATTCCAG	CTGGAATT	8.66e-05	0.000148012	0.000117329	0.0240653	-0.030828	2.47e-15	4.39e-25	2.47e-15	7.91551	-10.3459	7564	7891	2.97e-05	2.94e-05	2.96e-05	-0.0567759	0.055373	2.88e-06	3.22e-06	3.22e-06	-4.6795	4.65639	7761	8087	1.09e-05	1.55e-05	1.32e-05	-0.0233696	0.0272948	0.00420161	0.000646628	0.00420161	-2.86262	3.41128	7876	8207
AATTCTAC	GTAGAATT	4.82e-05	5.37e-05	5.09e-05	-0.0229156	0.0240041	3.62e-09	4.66e-10	3.62e-09	-5.90075	6.23029	4602	4694	0.00107929	0.00111289	0.00109609	-0.436439	0.442281	3.83e-175	1.56e-180	3.83e-175	-28.2226	28.6589	4743	4779	0.000346064	0.000473082	0.000409573	-0.16613	0.193043	1.54e-58	2.38e-79	1.54e-58	-16.1325	18.8634	4927	4994
AATTCTCC	GGAGAATT	0.00126316	0.00102366	0.00114341	-0.084228	0.0757882	9.23e-201	4.56e-163	4.56e-163	-30.2407	27.2199	9035	9058	5.73e-06	3.5e-07	3.04e-06	-0.022766	0.00563339	0.0398381	0.611718	0.611718	-2.05543	0.507623	9353	9330	0.000109503	5.87e-05	8.41e-05	-0.0677128	0.0496402	1.15e-19	3.12e-11	3.12e-11	-9.07374	6.64073	9461	9449
AATTGAAC	GTTCAATT	4e-05	4.76e-05	4.38e-05	-0.0220394	0.0239196	7.62e-08	4.43e-09	7.62e-08	-5.3759	5.86746	4180	4216	0.000488086	0.00050164	0.000494863	-0.315835	0.318787	2.95e-80	1.97e-82	2.95e-80	-18.9735	19.2352	4142	4161	0.000204214	0.000194847	0.000199531	-0.136776	0.133102	2.92e-35	1.01e-33	1.01e-33	-12.3919	12.1043	4328	4346
AATTGACA	TGTCAATT	8.57e-05	0.000106686	9.62e-05	-0.0291789	0.0322814	3.48e-15	1.59e-18	3.48e-15	-7.87238	8.78345	5079	5183	0.00300427	0.00323562	0.00311995	-0.707526	0.734901	0	0	0	-47.132	48.9187	5042	5033	0.000907677	0.000995116	0.000951397	-0.259968	0.270981	1.73e-150	8.53e-165	1.73e-150	-26.1344	27.3654	5282	5334
AATTGTGA	TCACAATT	0.000187741	0.000217762	0.000202751	0.0412486	-0.0444304	2.25e-31	4.04e-36	2.25e-31	11.6522	-12.5495	5519	5570	0.00208597	0.00187574	0.00198086	0.562524	-0.532609	0	6.01e-303	6.01e-303	39.2555	-37.2209	5487	5557	0.00131118	0.00111778	0.00121448	0.299759	-0.277253	1.64e-216	7.24e-185	7.24e-185	31.4171	-29.0048	5693	5725
AATTGTGT	ACACAATT	4.02e-05	8.63e-05	6.32e-05	0.0202516	-0.0295977	7e-08	2.82e-15	7e-08	5.39123	-7.89878	4975	4904	0.000189363	0.000142312	0.000165838	0.176597	-0.152457	3.24e-32	1.27e-24	1.27e-24	11.8163	-10.2434	5124	5084	0.000236307	0.000190522	0.000213415	0.132026	-0.118586	1.56e-40	5.19e-33	5.19e-33	13.3303	-11.9692	5336	5276
AATTTGAT	ATCAAATT	7.79e-05	6.38e-05	7.08e-05	0.0243075	-0.02234	6.15e-14	1.11e-11	1.11e-11	7.505	-6.79156	6644	6431	0.00107953	0.000966596	0.00102306	0.363931	-0.348563	3.52e-175	4.64e-157	4.64e-157	28.2256	-26.707	6838	6657	0.00043951	0.000450898	0.000445204	0.155033	-0.158933	7.51e-74	1.02e-75	7.51e-74	18.1815	-18.4156	7179	6992
AATTTGGC	NA	1.81e-05	NA	1.81e-05	0.0153672	NA	0.000299877	NA	0.000299877	3.61542	NA	3881	NA	0.000506978	NA	0.000506978	0.329085	NA	2.73e-83	NA	2.73e-83	19.3374	NA	3954	NA	0.000224967	NA	0.000224967	0.148322	NA	1.14e-38	NA	1.14e-38	13.0064	NA	4047	NA
AATTTTAT	ATAAAATT	7.16e-05	7.78e-05	7.47e-05	0.0156877	-0.0163786	6.33e-13	6.26e-14	6.33e-13	7.19331	-7.50259	14221	14229	0.000337014	0.000360685	0.00034885	0.130237	-0.135287	5.55e-56	8.69e-60	5.55e-56	15.7648	-16.3093	15882	15905	0.000387921	0.000398307	0.000393114	0.0931721	-0.0943727	2.13e-65	4.23e-67	2.13e-65	17.0807	-17.3079	16713	16842
AATTTTCT	AGAAAATT	4.54e-05	5.17e-05	4.86e-05	0.0127085	-0.0137167	1.01e-08	9.7e-10	1.01e-08	5.72991	-6.11433	13891	13679	0.00135156	0.00134704	0.0013493	0.275845	-0.280406	7.9e-219	4.19e-218	4.19e-218	31.5866	-31.5337	14538	14151	0.000498027	0.000454621	0.000476324	0.112361	-0.109035	1.95e-83	2.51e-76	2.51e-76	19.3546	-18.4915	15159	14764
AATTTTGG	CCAAAATT	7.09e-05	9.06e-05	8.08e-05	0.0217979	-0.0246158	8.05e-13	5.73e-16	8.05e-13	7.16046	-8.0952	7545	7538	0.00198026	0.00198136	0.00198081	0.469511	-0.470053	1.00749866499947e-319	6.71929278344095e-320	1.00749866499947e-319	38.2458	-38.2564	7552	7515	0.000920517	0.00100727	0.000963894	0.214877	-0.223777	1.37e-152	8.75e-167	1.37e-152	26.3187	-27.5322	7853	7890
AATTTTGT	ACAAAATT	4.34e-05	6.12e-05	5.23e-05	-0.0131466	0.0156792	2.12e-08	2.88e-11	2.12e-08	-5.60176	6.65261	12556	12549	0.000976901	0.00100716	0.000992028	0.249559	-0.253561	1.03e-158	1.44e-163	1.03e-158	26.8491	-27.2621	13058	13124	0.000417128	0.000504078	0.000460603	0.109174	-0.120535	3.48e-70	2e-84	3.48e-70	17.7123	-19.4719	13626	13601
AATTTTTG	CAAAAATT	0.00247921	0.0025473	0.00251325	-0.0722226	0.0734322	0	0	0	-42.3919	42.9716	23977	23941	0.000482437	0.000704419	0.000593428	0.127316	-0.154335	2.39e-79	5.49e-115	2.39e-79	18.8633	-22.7961	25038	24966	2.24e-06	6.32e-08	1.15e-06	-0.00587265	0.00098895	0.194674	0.827479	0.827479	-1.29688	0.217936	25553	25516
ACAAAAAA	TTTTTTGT	0.00231714	0.0021655	0.00224132	0.0549851	-0.053315	0	0	0	40.9796	-39.613	32116	32343	0.00270935	0.0023277	0.00251853	-0.238202	0.221223	0	0	0	-44.7522	41.4726	33394	33585	0.00112379	0.00102405	0.00107392	-0.103887	0.099245	7.52e-186	1.57e-169	1.57e-169	-29.0828	27.7608	34169	34416
ACAAAAAC	GTTTTTGT	0.000124703	9.18e-05	0.000108259	-0.0199763	0.016771	2.18e-21	3.7e-16	3.7e-16	-9.49629	8.14827	12423	12795	0.00470142	0.00448875	0.00459509	-0.498306	0.481609	0	0	0	-59.0106	57.6543	12542	12603	0.00249398	0.00235858	0.00242628	-0.244986	0.23513	0	0	0	-43.3548	42.1587	12942	13035
ACAAAAAG	CTTTTTGT	3.92e-05	0.000259001	0.000149115	-0.0138419	0.0324537	1e-07	1.24e-42	1e-07	-5.32591	13.6866	10158	12191	0.000911581	0.00109629	0.00100393	-0.270741	0.29589	3.12e-148	7.2e-178	3.12e-148	-25.9351	28.4441	10276	10412	0.000691589	0.000726876	0.000709233	-0.158741	0.162215	4e-115	6.71e-121	4e-115	-22.8099	23.385	10622	10747
ACAAAAAT	ATTTTTGT	0.0012613	0.00128573	0.00127352	0.0463005	-0.0463746	1.81e-200	2.59e-204	1.81e-200	30.2184	-30.51	28824	29221	0.00276102	0.0024491	0.00260506	-0.273246	0.256392	0	0	0	-45.1781	42.543	30250	30376	0.000429469	0.000340616	0.000385042	-0.0728192	0.0645947	3.31e-72	1.21e-57	1.21e-57	-17.9725	16.005	31014	31169
ACAAAACA	TGTTTTGT	1.31e-07	6.67e-06	3.4e-06	-0.000507798	0.00363603	0.757874	0.0280799	0.757874	-0.308274	2.19617	13600	13603	0.001488	0.00138317	0.00143559	-0.219956	0.212553	1.01e-240	6.69e-224	6.69e-224	-33.145	31.9544	13798	13781	0.00138561	0.00151423	0.00144992	-0.143582	0.150368	1.09e-228	9.75e-250	1.09e-228	-32.2976	33.7655	14242	14258
ACAAAACC	GGTTTTGT	0.000135428	7.93e-05	0.000107341	-0.034664	0.0265156	4.34e-23	3.73e-14	3.73e-14	-9.89625	7.57036	5673	5681	0.000769098	0.00074412	0.000756609	-0.335165	0.330348	2.29e-125	2.33e-121	2.33e-121	-23.8205	23.4302	5744	5721	0.00045065	0.000505086	0.000477868	-0.173292	0.183657	1.12e-75	1.36e-84	1.12e-75	-18.4106	19.4913	5892	5878
ACAAAACT	AGTTTTGT	7.53e-05	6.13e-05	6.83e-05	-0.0226753	0.0206212	1.58e-13	2.78e-11	2.78e-11	-7.38019	6.65779	7364	7235	0.000541259	0.000706794	0.000624027	-0.244828	0.283507	8.55e-89	2.28e-115	8.55e-89	-19.9808	22.8345	7551	7357	0.000266188	0.000316354	0.000291271	-0.115624	0.127539	1.94e-45	1.15e-53	1.94e-45	-14.1482	15.4243	7801	7618
ACAAAAGA	TCTTTTGT	0.000160621	0.000120872	0.000140747	-0.0285867	0.0243253	4.41e-27	8.85e-21	8.85e-21	-10.7776	9.34925	9727	10108	0.00107471	0.00109601	0.00108536	-0.299893	0.298533	2.09e-174	7.97e-178	2.09e-174	-28.1625	28.4405	9872	10156	0.000588487	0.000629884	0.000609185	-0.148991	0.151811	3.02e-98	5.04e-105	3.02e-98	-21.04	21.7679	10248	10576
ACAAAAGC	GCTTTTGT	0.000185923	0.000182897	0.00018441	-0.0385397	0.0376844	4.36e-31	1.31e-30	1.31e-30	-11.5956	11.5009	6296	6487	0.0025155	0.00263543	0.00257546	-0.574406	0.583797	0	0	0	-43.1173	44.1358	6383	6480	0.000858201	0.00091637	0.000887286	-0.226736	0.231993	2.16e-142	6.55e-152	2.16e-142	-25.4115	26.2593	6548	6686
ACAAAAGT	ACTTTTGT	1.41e-05	3.95e-05	2.68e-05	-0.0105017	0.0179095	0.00142062	8.91e-08	0.00142062	-3.19044	5.34767	6473	6223	0.000177879	0.000232715	0.000205297	-0.150533	0.176042	2.3e-30	3.35e-39	2.3e-30	-11.4523	13.0995	6627	6323	0.000106346	0.000125594	0.00011597	-0.0782004	0.086811	3.83e-19	2.54e-22	3.83e-19	-8.94196	9.71765	6867	6564
ACAAAATA	TATTTTGT	0.000337129	0.000229827	0.000283478	-0.0360452	0.0297321	5.82e-55	5.01e-38	5.01e-38	-15.6156	12.8925	12751	12819	0.00124789	0.00107619	0.00116204	-0.276045	0.255024	3.4e-202	1.21e-174	1.21e-174	-30.3495	28.182	13404	13552	0.0010546	0.00106511	0.00105986	-0.169322	0.169566	1.58e-174	3e-176	1.58e-174	-28.1723	28.3125	14068	14157
ACAAAATC	GATTTTGT	0.00031261	0.000360561	0.000336585	-0.0478151	0.0509854	4.29e-51	1.17e-58	4.29e-51	-15.0369	16.1494	6889	6946	0.000601	0.000844179	0.000722589	-0.27114	0.316708	2.19e-98	2.04e-137	2.19e-98	-21.0552	24.957	6852	6928	0.000588761	0.000669757	0.000629259	-0.180067	0.189612	2.72e-98	1.5e-111	2.72e-98	-21.0449	22.4467	7125	7171
ACAAAATG	CATTTTGT	0.0001758	9.53e-05	0.000135545	-0.0304951	0.0225802	1.74e-29	1.03e-16	1.03e-16	-11.2755	8.30101	9443	9428	0.0006233	0.000809154	0.000716227	-0.232445	0.267074	5.76e-102	8.53e-132	5.76e-102	-21.4425	24.4334	9596	9518	0.000253038	0.000392336	0.000322687	-0.0995377	0.124534	2.8e-43	4.02e-66	2.8e-43	-13.7942	17.1776	9945	9945
ACAAACAA	TTGTTTGT	7.26e-07	2.43e-06	1.58e-06	0.00101482	-0.00184603	0.468703	0.185316	0.468703	0.724591	-1.32456	13248	13322	0.0029751	0.00276686	0.00287098	-0.265284	0.254092	0	0	0	-46.9019	45.2259	13312	13379	0.00149917	0.00157006	0.00153461	-0.127472	0.129591	2.84e-247	7.12e-259	2.84e-247	-33.597	34.3833	13739	13782
ACAAACAC	GTGTTTGT	0.000130394	6.86e-05	9.95e-05	-0.0314366	0.0232097	2.73e-22	1.86e-12	1.86e-12	-9.71057	7.04476	6018	6105	0.000800373	0.000967642	0.000884008	-0.319338	0.354208	2.19e-130	3.15e-157	2.19e-130	-24.3003	26.7214	6112	6178	0.000641902	0.00070199	0.000671946	-0.192071	0.203827	5.44e-107	7.94e-117	5.44e-107	-21.9747	22.9809	6300	6354
ACAAACAG	CTGTTTGT	0.000215173	0.000619488	0.00041733	-0.0418621	0.0627857	1.04e-35	1.9e-99	1.04e-35	-12.4746	21.1709	6184	8002	0.00152876	0.00185196	0.00169036	-0.454959	0.501509	2.9e-247	3.95e-299	2.9e-247	-33.5966	36.9837	6192	6210	0.000825694	0.000841956	0.000833825	-0.226405	0.229459	4.52e-137	9.85e-140	4.52e-137	-24.9252	25.1696	6329	6319
ACAAACAT	ATGTTTGT	0.000179117	9.79e-05	0.000138498	-0.0349026	0.0254557	5.21e-30	4e-17	4e-17	-11.3814	8.41303	7449	7569	0.000499839	0.000511686	0.000505762	-0.234824	0.234044	3.83e-82	4.79e-84	3.83e-82	-19.2006	19.427	7650	7793	0.00040332	0.000382629	0.000392974	-0.141814	0.136361	6.38e-68	1.57e-64	1.57e-64	-17.4165	16.9637	7907	8049
ACAAACCA	TGGTTTGT	0.000277565	0.000328953	0.000303259	-0.0518142	0.0557702	1.45e-45	1.13e-53	1.45e-45	-14.1687	15.425	5201	5319	0.00241036	0.00255171	0.00248103	-0.62247	0.632892	0	0	0	-42.2043	43.4273	5215	5327	0.000658225	0.000838339	0.000748282	-0.219965	0.244682	1.16e-109	3.85e-139	1.16e-109	-22.2525	25.1155	5342	5483
ACAAACCC	GGGTTTGT	0.000188721	0.000238005	0.000213363	-0.0489856	0.0555836	1.58e-31	2.56e-39	1.58e-31	-11.6826	13.12	3960	3900	0.00124406	0.0012488	0.00124643	-0.516136	0.52071	1.4e-201	2.43e-202	1.4e-201	-30.3028	30.3606	3918	3889	0.000743466	0.000672952	0.000708209	-0.271818	0.260321	1.29e-123	4.5e-112	4.5e-112	-23.6506	22.5002	3961	3931
ACAAACCT	AGGTTTGT	0.000524384	0.000601557	0.000562971	-0.0644131	0.0690831	1.8e-84	1.27e-96	1.8e-84	-19.4772	20.862	5963	5990	0.00307105	0.00278447	0.00292776	-0.640216	0.603897	0	0	0	-47.6545	45.37	5997	6100	0.000697005	0.000756744	0.000726875	-0.207864	0.213482	5.2e-116	8.68e-126	5.2e-116	-22.8991	23.861	6125	6268
ACAAACTA	TAGTTTGT	0.000206565	0.000115946	0.000161255	-0.0469602	0.0352122	2.37e-34	5.36e-20	5.36e-20	-12.2225	9.15673	4703	4709	0.00177498	0.00184071	0.00180784	-0.562818	0.572729	8.94e-287	2.52e-297	8.94e-287	-36.2055	36.871	4694	4700	0.00074553	0.000796228	0.000770879	-0.243767	0.252042	5.94e-124	3e-132	5.94e-124	-23.6834	24.476	4932	4923
ACAAACTG	CAGTTTGT	2.07e-05	6.59e-05	4.33e-05	-0.0143198	0.0269567	0.000107574	5.05e-12	0.000107574	-3.87286	6.90431	5130	4613	0.000490508	0.000585872	0.00053819	-0.299399	0.328758	1.21e-80	5.87e-96	1.21e-80	-19.0205	20.7884	4608	4590	0.000255197	0.000280211	0.000267704	-0.144755	0.152983	1.24e-43	9.71e-48	1.24e-43	-13.853	14.5162	4811	4748
ACAAAGAA	TTCTTTGT	0.000297306	0.000251838	0.000274572	-0.0346352	0.0307467	1.11e-48	1.67e-41	1.67e-41	-14.6641	13.4959	12174	12734	0.00301917	0.00270369	0.00286143	-0.449305	0.430982	0	0	0	-47.249	44.7052	12301	11976	0.00108169	0.000990879	0.00103629	-0.180722	0.174955	5.82e-179	4.21e-164	4.21e-164	-28.5323	27.307	12748	12446
ACAAAGAC	GTCTTTGT	0.000175987	0.000216962	0.000196475	-0.0404134	0.0444354	1.63e-29	5.4e-36	1.63e-29	-11.2815	12.5264	5404	5480	0.00174625	0.00157446	0.00166036	-0.525572	0.495061	3.64e-282	1.35e-254	1.35e-254	-35.9108	34.0958	5282	5345	0.000933989	0.000816104	0.000875047	-0.258263	0.239907	8.58e-155	1.68e-135	1.68e-135	-26.5108	24.7799	5483	5517
ACAAAGAG	CTCTTTGT	0.000165435	0.000182057	0.000173746	-0.0344853	0.0359605	7.63e-28	1.78e-30	7.63e-28	-10.938	11.4744	6953	6977	0.00242192	0.00236936	0.00239564	-0.539045	0.531653	0	0	0	-42.3057	41.843	6934	6915	0.000858495	0.00102525	0.000941873	-0.216666	0.235791	1.94e-142	1e-169	1.94e-142	-25.4158	27.7771	7130	7132
ACAAAGAT	ATCTTTGT	0.000199332	0.000149625	0.000174479	-0.0364625	0.0312881	3.3e-33	2.43e-25	2.43e-25	-12.0066	10.4021	7469	7455	0.002931	0.00271749	0.00282424	-0.568831	0.546847	0	0	0	-46.5519	44.8195	7528	7491	0.000835484	0.000722979	0.000779232	-0.204253	0.187952	1.13e-138	2.91e-120	2.91e-120	-25.0726	23.3222	7786	7808
ACAAAGCA	TGCTTTGT	0.000139293	0.000157036	0.000148164	-0.0308699	0.0317653	1.06e-23	1.63e-26	1.06e-23	-10.0365	10.6567	7340	7807	0.000593641	0.000598072	0.000595856	-0.261335	0.256784	3.32e-97	6.46e-98	3.32e-97	-20.9258	21.0039	7272	7586	0.000341994	0.000305895	0.000323944	-0.133979	0.124371	7.17e-58	5.95e-52	5.95e-52	-16.0373	15.1671	7469	7749
ACAAAGCC	GGCTTTGT	4.22e-05	5.62e-05	4.92e-05	-0.0210329	0.0244958	3.26e-08	1.8e-10	3.26e-08	-5.52696	6.37764	4758	4727	0.000730526	0.000557975	0.00064425	-0.357777	0.314555	3.55e-119	1.77e-91	1.77e-91	-23.215	20.2871	4765	4745	0.000150328	0.000139349	0.000144838	-0.11019	0.106607	2.13e-26	1.37e-24	1.37e-24	-10.6317	10.236	4844	4831
ACAAAGCT	AGCTTTGT	0.000298664	0.000284513	0.000291589	-0.0501039	0.0483766	6.79e-49	1.16e-46	1.16e-46	-14.6975	14.345	5903	5961	0.00347132	0.00341395	0.00344264	-0.702097	0.693773	0	0	0	-50.6752	50.2532	5818	5869	0.000396123	0.000547175	0.000471649	-0.159655	0.18693	9.63e-67	1.75e-91	9.63e-67	-17.2604	20.2876	6004	6047
ACAAAGGG	CCCTTTGT	0.000102022	0.000135281	0.000118651	-0.0314734	0.0362045	8.77e-18	4.58e-23	8.77e-18	-8.58928	9.89088	5224	5223	0.00245247	0.00233427	0.00239337	-0.631152	0.615746	0	0	0	-42.5723	41.5313	5203	5188	0.000787007	0.000622712	0.000704859	-0.242841	0.215509	9.68e-131	7.53e-104	7.53e-104	-24.3338	21.6435	5284	5291
ACAAATAA	TTATTTGT	0.000170838	0.000170667	0.000170753	-0.027811	0.0276418	1.06e-28	1.13e-28	1.13e-28	-11.1152	11.1096	10861	10945	0.000748587	0.000798534	0.00077356	-0.231499	0.237542	4.48e-122	4.32e-130	4.48e-122	-23.5004	24.2724	11430	11537	0.00066884	0.000627511	0.000648176	-0.146363	0.14094	2.12e-111	1.23e-104	1.23e-104	-22.4314	21.7268	11958	12043
ACAAATAG	CTATTTGT	6.48e-05	9.26e-05	7.87e-05	-0.0258386	0.0300564	7.54e-12	2.76e-16	7.54e-12	-6.8471	8.18355	4871	5166	0.000294363	0.000273281	0.000283822	-0.222	0.215292	4.01e-49	9.88e-46	9.88e-46	-14.7332	14.1957	4987	4945	0.000226022	0.000189591	0.000207806	-0.13046	0.119991	7.62e-39	7.39e-33	7.39e-33	-13.0369	11.9399	5203	5176
ACAAATCA	TGATTTGT	0.000259836	0.000195834	0.000227835	-0.04735	0.0405787	9.13e-43	1.18e-32	1.18e-32	-13.7086	11.9008	5808	5999	0.000628055	0.000876494	0.000752274	-0.298142	0.347526	9.93e-103	1.33e-142	9.93e-103	-21.5242	25.4306	5897	6090	0.000527559	0.000582315	0.000554937	-0.183632	0.190512	2.85e-88	3.09e-97	2.85e-88	-19.9205	20.9293	6111	6306
ACAAATCC	GGATTTGT	6.74e-05	6.57e-05	6.66e-05	-0.0315628	0.0310965	2.89e-12	5.52e-12	5.52e-12	-6.98296	6.89159	3421	3436	0.000359319	0.0003392	0.00034926	-0.296317	0.286437	1.44e-59	2.47e-56	2.47e-56	-16.2784	15.8159	3448	3479	0.000278551	0.000210344	0.000244447	-0.176455	0.152596	1.82e-47	2.87e-36	2.87e-36	-14.4731	12.5765	3529	3562
ACAAATCT	AGATTTGT	4.65e-05	4.64e-05	4.65e-05	-0.0210975	0.0211831	6.69e-09	6.88e-09	6.88e-09	-5.79847	5.79383	5273	5245	0.00020586	0.000277591	0.000241726	-0.179067	0.209595	7.09e-35	2e-46	7.09e-35	-12.3204	14.3072	5391	5328	0.000156793	0.000192036	0.000174415	-0.105282	0.117102	1.84e-27	2.93e-33	1.84e-27	-10.8579	12.0166	5568	5532
ACAAATGA	TCATTTGT	7.84e-05	8.25e-05	8.05e-05	-0.0220532	0.0226761	5.09e-14	1.12e-14	5.09e-14	-7.52963	7.72518	8073	8052	0.000329925	0.000257623	0.000293774	-0.183629	0.162106	7.65e-55	3.27e-43	3.27e-43	-15.5981	13.7829	8165	8199	0.000248101	0.000141971	0.000195036	-0.106961	0.0810143	1.81e-42	5.08e-25	5.08e-25	-13.6589	10.3319	8476	8477
ACAAATGC	GCATTTGT	2.46e-05	3.83e-05	3.14e-05	-0.0159558	0.019767	2.5e-05	1.42e-07	2.5e-05	-4.21443	5.26239	4890	4940	0.000260623	0.000152429	0.000206526	-0.21052	0.159448	1.08e-43	2.95e-26	2.95e-26	-13.8629	10.6013	4950	5044	0.000102761	8.46e-05	9.37e-05	-0.0892687	0.0804241	1.5e-18	1.52e-15	1.52e-15	-8.78993	7.97516	5087	5145
ACAAATGG	CCATTTGT	0.000385335	0.000494695	0.000440015	-0.0504668	0.0578369	1.46e-62	8.56e-80	1.46e-62	-16.6952	18.9175	7533	7466	0.00584902	0.00577825	0.00581363	-0.811822	0.809898	0	0	0	-65.8579	65.4559	7395	7404	0.00134196	0.00108685	0.0012144	-0.260464	0.235971	1.5e-221	8.34e-180	8.34e-180	-31.7842	28.6002	7691	7680
ACAAATTC	GAATTTGT	0.000113695	6.13e-05	8.75e-05	-0.0330487	0.0241069	1.22e-19	2.8e-11	2.8e-11	-9.06741	6.65681	5269	5322	0.000397404	0.000463726	0.000430565	-0.250414	0.270644	1.09e-65	2.42e-76	1.09e-65	-17.1196	18.4937	5350	5310	0.000307028	0.000386871	0.00034695	-0.147625	0.165882	3.88e-52	3.16e-65	3.88e-52	-15.1951	17.0575	5563	5520
ACAACAAA	TTTGTTGT	5.66e-05	4.17e-05	4.91e-05	-0.0162925	0.0138781	1.6e-10	4.04e-08	4.04e-08	-6.39547	5.48918	10381	10584	0.00221927	0.00223106	0.00222517	-0.413699	0.412535	0	0	0	-40.493	40.6007	10545	10680	0.00146627	0.00161202	0.00153915	-0.226288	0.236007	6.86e-242	9.68e-266	6.86e-242	-33.2258	34.8405	10914	11044
ACAACAAC	GTTGTTGT	3.33e-05	4.35e-05	3.84e-05	0.00879526	-0.0097819	9.2e-07	2.07e-08	9.2e-07	4.90799	-5.60578	5290	5454	0.000908822	0.00100665	0.000957737	-0.189728	0.193086	8.65e-148	1.74e-163	8.65e-148	-25.8958	27.2553	5306	5468	0.000509934	0.000535337	0.000522636	-0.0956077	0.0954713	2.19e-85	1.52e-89	2.19e-85	-19.5847	20.0668	5446	5607
ACAACAAG	CTTGTTGT	5.77e-06	6.09e-06	5.93e-06	-0.0101418	0.0104074	0.0411706	0.0358864	0.0411706	-2.04181	2.09822	2846	2843	0.000279352	0.000276091	0.000277721	-0.286166	0.283955	1.04e-46	3.49e-46	3.49e-46	-14.3525	14.2685	2885	2888	7.91e-05	9.71e-05	8.81e-05	-0.102937	0.113977	1.26e-14	1.29e-17	1.26e-14	-7.71045	8.54467	2954	2951
ACAACAAT	ATTGTTGT	5.67e-05	3.69e-05	4.68e-05	-0.0248769	0.0197722	1.55e-10	2.38e-07	2.38e-07	-6.40043	5.16696	4591	4742	0.000292877	0.000289421	0.000291149	-0.228075	0.223995	6.95e-49	2.5e-48	2.5e-48	-14.696	14.609	4709	4826	0.000226116	0.000205714	0.000215915	-0.134673	0.127108	7.36e-39	1.65e-35	1.65e-35	-13.0396	12.4373	4888	4988
ACAACACA	TGTGTTGT	0.0002096	0.000654057	0.000431828	-0.0413584	0.0653833	7.87e-35	6.85e-105	7.87e-35	-12.312	21.7539	5281	7305	0.000727791	0.000787143	0.000757467	-0.330474	0.337406	9.74e-119	2.91e-128	9.74e-119	-23.1715	24.0985	5284	5362	0.000518102	0.000696855	0.000607479	-0.188059	0.214547	1.01e-86	5.5e-116	1.01e-86	-19.741	22.8966	5433	5508
ACAACAGA	TCTGTTGT	8.02e-05	8.99e-05	8.5e-05	-0.0250234	0.0261969	2.68e-14	7.43e-16	2.68e-14	-7.6131	8.06337	6444	6561	0.000681903	0.000690389	0.000686146	-0.297096	0.296274	2.26e-111	9.81e-113	2.26e-111	-22.4286	22.5678	6487	6547	0.000374022	0.00032528	0.000349651	-0.148776	0.137913	4.03e-63	3.94e-55	3.94e-55	-16.7718	15.6404	6641	6672
ACAACAGC	GCTGTTGT	1.28e-05	1.93e-05	1.61e-05	-0.0132182	0.0160393	0.00237722	0.000183829	0.00237722	-3.03856	3.74028	3697	3730	0.000448339	0.000320066	0.000384203	-0.318125	0.26676	7.15e-74	2.94e-53	2.94e-53	-18.1841	15.3632	3730	3764	0.000155149	0.000130626	0.000142887	-0.127077	0.115588	3.43e-27	3.76e-23	3.76e-23	-10.8008	9.91043	3790	3831
ACAACATA	TATGTTGT	7.27e-05	7.99e-05	7.63e-05	-0.027647	0.0289128	4.11e-13	2.96e-14	4.11e-13	-7.2521	7.60015	4806	4748	0.000933161	0.000969851	0.000951506	-0.402132	0.412195	1.08e-151	1.39e-157	1.08e-151	-26.2406	26.752	4841	4758	0.000937488	0.000815529	0.000876508	-0.269031	0.251275	2.3e-155	2.08e-135	2.08e-135	-26.5605	24.7711	5087	5037
ACAACATG	CATGTTGT	2.81e-05	2.03e-05	2.42e-05	-0.016934	0.0142722	6.55e-06	0.00012828	0.00012828	-4.508	3.82976	4978	5013	0.000275786	0.000304265	0.000290025	-0.214643	0.222795	3.91e-46	1.02e-50	3.91e-46	-14.2606	14.9791	5056	5094	6.56e-05	0.000125225	9.54e-05	-0.0708321	0.0965287	2.17e-12	2.93e-22	2.17e-12	-7.02306	9.70336	5172	5233
ACAACCAA	TTGGTTGT	4.83e-05	7.67e-05	6.25e-05	-0.0250991	0.0317752	3.39e-09	9.52e-14	3.39e-09	-5.91169	7.4476	3804	3839	0.000961728	0.000888974	0.000925351	-0.457219	0.440894	2.8e-156	1.32e-144	1.32e-144	-26.6396	25.6112	3829	3855	0.000435619	0.000355116	0.000395367	-0.208185	0.188164	3.26e-73	5.06e-60	5.06e-60	-18.1008	16.3422	3915	3959
ACAACCAC	GTGGTTGT	2.5e-05	2.95e-05	2.73e-05	-0.0197094	0.0216121	2.08e-05	3.8e-06	2.08e-05	-4.25593	4.62208	3141	3124	0.0004668	0.000404286	0.000435543	-0.341858	0.323201	7.75e-77	8.55e-67	8.55e-67	-18.5549	17.2673	3240	3189	0.000197817	0.000215149	0.000206483	-0.15047	0.159922	3.28e-34	4.66e-37	3.28e-34	-12.1962	12.7194	3321	3246
ACAACCAG	CTGGTTGT	4.73e-05	1.87e-05	3.3e-05	-0.026478	0.0164799	5.06e-09	0.000234936	0.000234936	-5.8454	3.67816	3395	3486	0.000374898	0.000430695	0.000402797	-0.303361	0.32345	4.51e-62	4.88e-71	4.51e-62	-16.6276	17.8226	3421	3469	0.000119497	0.000121505	0.000120501	-0.116467	0.116331	2.58e-21	1.2e-21	2.58e-21	-9.47882	9.55812	3466	3545
ACAACCAT	ATGGTTGT	0.00010285	5.57e-05	7.93e-05	-0.0396208	0.0284146	6.47e-18	2.17e-10	2.17e-10	-8.62408	6.34904	3303	3512	0.00184299	0.00157561	0.0017093	-0.678161	0.614932	1.08e-297	8.83e-255	8.83e-255	-36.8939	34.1082	3363	3530	0.000453675	0.000420183	0.000436929	-0.227059	0.214296	3.59e-76	1.1e-70	1.1e-70	-18.4723	17.777	3458	3632
ACAACCCA	TGGGTTGT	3.09e-05	6.81e-05	4.95e-05	-0.0218978	0.0318533	2.28e-06	2.28e-12	2.28e-06	-4.7271	7.01606	3275	3358	0.00039275	0.000503558	0.000448154	-0.312921	0.354271	6.1e-65	9.68e-83	6.1e-65	-17.0191	19.272	3357	3344	0.00010231	0.00020057	0.00015144	-0.108317	0.151035	1.78e-18	1.16e-34	1.78e-18	-8.77063	12.2808	3420	3435
ACAACCCC	GGGGTTGT	7.74e-06	5.21e-06	6.47e-06	-0.0114074	0.00950383	0.0179807	0.0523736	0.0523736	-2.36602	1.94005	3015	2921	0.00180895	0.00178967	0.00179931	-0.700113	0.721114	3.15e-292	3.92e-289	3.92e-289	-36.551	36.3553	3058	2905	0.000345643	0.000267174	0.000306408	-0.208393	0.189499	1.81e-58	1.34e-45	1.34e-45	-16.1227	14.1744	3090	2942
ACAACCCT	AGGGTTGT	1.69e-10	2.64e-09	1.41e-09	5.35e-05	0.000215444	0.991172	0.965122	0.991172	0.0110649	0.0437272	2976	2871	0.000256401	0.000331705	0.000294053	-0.267903	0.303688	5.14e-43	3.96e-55	5.14e-43	-13.7502	15.6401	2999	2912	6.16e-05	0.000100385	8.1e-05	-0.0891992	0.11384	1.02e-11	3.71e-18	1.02e-11	-6.80306	8.68771	3043	2939
ACAACCTA	TAGGTTGT	0.000110265	8.1e-05	9.56e-05	-0.043267	0.0379479	4.29e-19	1.99e-14	1.99e-14	-8.92956	7.6512	2917	2795	0.00119836	0.00135738	0.00127787	-0.588158	0.623565	3.01e-194	9.19e-220	3.01e-194	-29.7404	31.6547	2867	2756	0.000490755	0.000408612	0.000449684	-0.252334	0.229217	3.03e-82	8.66e-69	8.66e-69	-19.2127	17.5305	2983	2877
ACAACCTC	GAGGTTGT	0.000171614	0.000190568	0.000181091	-0.0470333	0.050545	8.02e-29	8.04e-32	8.02e-29	-11.1404	11.7396	3925	3787	5.04e-05	4.4e-05	4.72e-05	-0.102369	0.09742	1.11e-09	1.23e-08	1.23e-08	-6.09351	5.69535	4034	3919	3.27e-05	2.99e-05	3.13e-05	-0.0562357	0.0547816	7.15e-07	2.11e-06	2.11e-06	-4.95726	4.74286	4064	3948
ACAACTAA	TTAGTTGT	5.89e-05	3.01e-05	4.45e-05	-0.0307551	0.0218756	6.75e-11	3.07e-06	3.07e-06	-6.52623	4.66582	3169	3187	0.000190898	0.000221884	0.000206391	-0.221775	0.239637	1.83e-32	1.86e-37	1.83e-32	-11.8641	12.791	3279	3261	8.27e-05	6.14e-05	7.2e-05	-0.0977257	0.0844329	3.19e-15	1.07e-11	1.07e-11	-7.88329	6.79631	3427	3397
ACAACTAC	GTAGTTGT	5.49e-05	1.2e-05	3.34e-05	-0.0342386	0.0164271	2.94e-10	0.00327002	0.00327002	-6.30217	2.94115	2215	2185	0.000581674	0.000506561	0.000544118	-0.460612	0.436436	2.77e-95	3.19e-83	3.19e-83	-20.7137	19.3294	2199	2198	0.000241354	0.000321444	0.000281399	-0.198256	0.233416	2.31e-41	1.68e-54	2.31e-41	-13.4719	15.5479	2296	2287
ACAACTTC	NA	1.44e-05	NA	1.44e-05	-0.0149371	NA	0.00123059	NA	0.00123059	-3.23171	NA	3296	NA	0.000172843	NA	0.000172843	-0.209246	NA	1.5e-29	NA	1.5e-29	-11.289	NA	3348	NA	8.51e-05	NA	8.51e-05	-0.0993079	NA	1.24e-15	NA	1.24e-15	-8.00048	NA	3430	NA
ACAAGAAA	TTTCTTGT	0.00018032	0.000193098	0.000186709	-0.0297929	0.0304573	3.36e-30	3.2e-32	3.36e-30	-11.4195	11.8173	10099	10348	0.00336444	0.00331759	0.00334102	-0.520762	0.512911	0	0	0	-49.8862	49.5365	10273	10442	0.00111878	0.00101847	0.00106863	-0.201659	0.190932	4.96e-185	1.29e-168	1.29e-168	-29.0179	27.685	10654	10831
ACAAGAAC	GTTCTTGT	0.000104249	4.21e-05	7.32e-05	-0.03612	0.0229313	3.88e-18	3.4e-08	3.4e-08	-8.68251	5.51942	4034	4037	0.000612995	0.000663651	0.000638323	-0.357528	0.370435	2.6e-100	1.92e-108	2.6e-100	-21.2644	22.1262	4032	4059	0.000195887	0.000161306	0.000178596	-0.136995	0.123757	6.81e-34	3.32e-28	3.32e-28	-12.1365	11.0131	4109	4139
ACAAGAAG	CTTCTTGT	7.3e-05	6.88e-05	7.09e-05	-0.026596	0.0252173	3.77e-13	1.75e-12	1.75e-12	-7.26355	7.05294	5232	5426	0.000910302	0.00096076	0.000935531	-0.381097	0.384109	5.01e-148	4.01e-156	5.01e-148	-25.9169	26.6262	5299	5446	0.000136155	0.000134698	0.000135427	-0.0995044	0.0973335	4.61e-24	8.02e-24	8.02e-24	-10.118	10.0637	5442	5573
ACAAGAAT	ATTCTTGT	1.27e-07	5.22e-06	2.67e-06	0.00105796	-0.00679014	0.762101	0.052052	0.762101	0.302723	-1.94271	5668	5698	0.000162051	0.000190141	0.000176096	-0.15237	0.165977	8.25e-28	2.43e-32	8.25e-28	-10.9308	11.8405	5827	5785	4.31e-05	7.24e-05	5.77e-05	-0.0529344	0.0691497	1.27e-08	1.62e-13	1.27e-08	-5.69037	7.37706	6010	5944
ACAAGACA	TGTCTTGT	0.000212336	0.000125051	0.000168693	-0.0442596	0.0338971	2.91e-35	1.92e-21	1.92e-21	-12.3921	9.50952	5414	5318	0.00118475	0.00120448	0.00119461	-0.433691	0.43577	4.61e-192	3.14e-195	4.61e-192	-29.5707	29.8163	5245	5294	0.000628718	0.000568585	0.000598652	-0.213748	0.199922	7.82e-105	5.47e-95	5.47e-95	-21.7477	20.6809	5362	5416
ACAAGAGA	TCTCTTGT	0.000102195	9.5e-05	9.86e-05	-0.0300293	0.0290703	8.23e-18	1.14e-16	1.14e-16	-8.59657	8.28989	5690	5664	0.000841313	0.00104907	0.000945192	-0.354163	0.3964	5.89e-137	2.71e-170	5.89e-137	-24.9146	27.8242	5636	5592	0.000441369	0.000543428	0.000492399	-0.172726	0.192238	3.72e-74	7.19e-91	3.72e-74	-18.2199	20.218	5806	5774
ACAAGAGC	GCTCTTGT	0.000344711	0.000321727	0.000333219	0.0584205	-0.0567668	3.71e-56	1.56e-52	1.56e-52	15.7903	-15.2546	5139	5097	0.00038296	0.000471916	0.000427438	-0.248523	0.278849	2.28e-63	1.17e-77	2.28e-63	-16.8055	18.6564	5256	5167	4.11e-05	7.09e-05	5.6e-05	-0.0555128	0.0735538	2.68e-08	2.89e-13	2.68e-08	-5.56101	7.29961	5300	5218
ACAAGAGT	ACTCTTGT	0.000159672	0.000141953	0.000150813	0.0415031	-0.0386528	6.24e-27	4e-24	4e-24	10.7457	-10.1319	4685	4826	3.4e-05	6.14e-05	4.77e-05	-0.0773579	0.104444	5.58e-07	1.7e-11	5.58e-07	-5.00525	6.72939	4788	4765	1.59e-05	8.05e-06	1.2e-05	-0.0358987	0.0256451	0.000552573	0.0139087	0.0139087	-3.4539	2.45962	4864	4851
ACAAGCAA	TTGCTTGT	0.000236822	0.000261289	0.000249056	-0.0468907	0.0490697	3.93e-39	5.38e-43	3.93e-39	-13.0873	13.7469	5432	5487	0.00419794	0.00449763	0.00434779	-0.810686	0.842736	0	0	0	-55.7474	57.7116	5372	5341	0.00126204	0.0013486	0.00130532	-0.298667	0.308582	1.8e-208	1.23e-222	1.8e-208	-30.8219	31.8628	5572	5588
ACAAGCAC	GTGCTTGT	0.000138778	7.71e-05	0.000107944	-0.0491542	0.0362489	1.28e-23	8.2e-14	8.2e-14	-10.0179	7.4672	2893	2939	0.000179419	0.000191095	0.000185257	-0.225173	0.230118	1.3e-30	1.7e-32	1.3e-30	-11.5018	11.8702	2962	3012	7.72e-05	0.000106738	9.19e-05	-0.100299	0.116893	2.61e-14	3.3e-19	2.61e-14	-7.61638	8.95843	3008	3055
ACAAGCAG	NA	8.71e-05	NA	8.71e-05	-0.0335122	NA	2.08e-15	NA	2.08e-15	-7.93659	NA	3903	NA	0.000167433	NA	0.000167433	-0.189988	NA	1.12e-28	NA	1.12e-28	-11.1109	NA	3881	NA	3.8e-05	NA	3.8e-05	-0.0615734	NA	9.21e-08	NA	9.21e-08	-5.34171	NA	3924	NA
ACAAGCAT	ATGCTTGT	0.000382207	0.000376444	0.000379326	-0.0650325	0.0635485	4.54e-62	3.68e-61	3.68e-61	-16.6272	16.5014	4589	4731	0.000900261	0.000920155	0.000910208	-0.401886	0.402214	2.05e-146	1.31e-149	2.05e-146	-25.7734	26.0569	4716	4803	0.000531989	0.000549589	0.000540789	-0.209558	0.210553	5.37e-89	7.05e-92	5.37e-89	-20.004	20.3323	4802	4905
ACAAGCCA	TGGCTTGT	2.24e-05	4.13e-05	3.19e-05	-0.016738	0.0228324	5.69e-05	4.62e-08	5.69e-05	-4.02522	5.46549	4049	4023	0.000976446	0.00114475	0.0010606	-0.449449	0.490201	1.22e-158	1.2e-185	1.22e-158	-26.8429	29.0668	4082	4031	0.000285307	0.000273196	0.000279251	-0.164786	0.162877	1.42e-48	1.38e-46	1.38e-46	-14.6476	14.3333	4154	4079
ACAAGCGT	ACGCTTGT	0.000162078	0.000145633	0.000153856	-0.101127	0.0940219	2.59e-27	1.04e-24	1.04e-24	-10.8264	10.2624	810	839	1.75e-06	1.7e-06	1.73e-06	-0.0425679	0.0408351	0.255776	0.262632	0.262632	-1.13643	1.12019	823	866	1.03e-05	2.33e-05	1.68e-05	-0.0703447	0.103322	0.00539	2.86e-05	0.00539	-2.78276	4.18458	830	867
ACAAGGAA	TTCCTTGT	9.36e-05	0.000495597	0.000294597	-0.0268775	0.0548696	1.92e-16	6.17e-80	1.92e-16	-8.22692	18.9348	6516	8331	0.000465814	0.000360386	0.0004131	-0.244147	0.216512	1.12e-76	9.7e-60	9.7e-60	-18.5353	16.3025	6549	6424	0.000142721	7.79e-05	0.000110329	-0.0913703	0.0679269	3.82e-25	1.94e-14	1.94e-14	-10.3592	7.65488	6715	6614
ACAAGGCT	NA	0.000103361	NA	0.000103361	-0.0369525	NA	5.37e-18	NA	5.37e-18	-8.64547	NA	3855	NA	0.00293118	NA	0.00293118	-0.804914	NA	0	NA	0	-46.5534	NA	3828	NA	0.000312145	NA	0.000312145	-0.177273	NA	5.61e-53	NA	5.61e-53	-15.3213	NA	3938	NA
ACAAGGTC	GACCTTGT	0.000191142	0.000231332	0.000211237	0.0427951	-0.0476168	6.52e-32	2.9e-38	6.52e-32	11.7573	-12.9347	5272	5177	8.51e-06	6.4e-06	7.46e-06	-0.0362215	0.0316115	0.0122417	0.0298468	0.0298468	-2.50511	2.17212	5463	5414	0.000207444	0.00014915	0.000178297	0.12214	-0.104239	8.59e-36	3.33e-26	3.33e-26	12.4895	-10.5899	5487	5435
ACAATAAA	TTTATTGT	0.000304935	0.00032963	0.000317283	-0.0391346	0.0404086	6.96e-50	8.86e-54	6.96e-50	-14.8511	15.4409	9854	9944	0.000893785	0.000871156	0.000882471	-0.266452	0.261279	2.24e-145	9.58e-142	9.58e-142	-25.6805	25.353	10368	10405	0.000728753	0.000791395	0.000760074	-0.161009	0.166868	3.31e-121	1.85e-131	3.31e-121	-23.4152	24.4016	10838	10867
ACAATAAC	GTTATTGT	9.1e-05	7.81e-05	8.46e-05	-0.0350043	0.031782	4.98e-16	5.67e-14	5.67e-14	-8.11224	7.5157	3704	3868	0.00028251	0.000324446	0.000303478	-0.247873	0.260505	3.23e-47	5.82e-54	3.23e-47	-14.4335	15.468	3826	3965	0.00012853	0.000246518	0.000187524	-0.11271	0.152735	8.34e-23	3.29e-42	8.34e-23	-9.83057	13.6153	3950	4113
ACAATAAT	ATTATTGT	0.00015899	0.000118478	0.000138734	-0.0347407	0.0295129	8e-27	2.12e-20	2.12e-20	-10.7228	9.25618	6566	6767	0.000839992	0.000815917	0.000827954	-0.316437	0.308146	9.6e-137	7.01e-133	7.01e-133	-24.895	24.5354	6938	7123	0.000525302	0.000597478	0.00056139	-0.167415	0.176053	6.68e-88	1.02e-99	6.68e-88	-19.8778	21.2002	7266	7462
ACAATAGA	TCTATTGT	9.15e-05	8.23e-05	8.69e-05	-0.0338433	0.0313741	4.15e-16	1.2e-14	1.2e-14	-8.13422	7.71657	4030	4146	0.000260179	0.000258896	0.000259538	-0.229393	0.224568	1.27e-43	2.04e-43	2.04e-43	-13.8511	13.8169	4163	4227	0.000184434	0.000222701	0.000203568	-0.129349	0.139495	5.2e-32	2.68e-38	5.2e-32	-11.7763	12.9407	4339	4422
ACAATAGC	GCTATTGT	0.000287112	0.000361979	0.000324545	-0.0562583	0.0635346	4.52e-47	7.02e-59	4.52e-47	-14.4104	16.1811	4643	4574	0.00035675	0.000358366	0.000357558	-0.254941	0.257706	3.73e-59	2.05e-59	3.73e-59	-16.22	16.2567	4676	4587	0.000247687	0.000268469	0.000258078	-0.143954	0.150701	2.11e-42	8.2e-46	2.11e-42	-13.6476	14.2087	4770	4705
ACAATCAA	TTGATTGT	0.000136739	9.87e-05	0.000117706	-0.0419145	0.0347054	2.69e-23	2.99e-17	2.99e-17	-9.94405	8.44716	3812	4007	0.000612583	0.000511839	0.000562211	-0.358453	0.325391	3.03e-100	4.53e-84	4.53e-84	-21.2573	19.4299	3902	4038	0.000328248	0.000295729	0.000311989	-0.176126	0.165988	1.28e-55	2.76e-50	2.76e-50	-15.7116	14.9128	4055	4204
ACAATCAC	NA	8.58e-05	NA	8.58e-05	-0.0362007	NA	3.42e-15	NA	3.42e-15	-7.87481	NA	3174	NA	0.000147287	NA	0.000147287	-0.191744	NA	2e-25	NA	2e-25	-10.4209	NA	3240	NA	0.000104083	NA	0.000104083	-0.10941	NA	9.07e-19	NA	9.07e-19	-8.84628	NA	3297	NA
ACAATCAG	NA	6.09e-05	NA	6.09e-05	-0.0313678	NA	3.26e-11	NA	3.26e-11	-6.63449	NA	3137	NA	0.00013401	NA	0.00013401	-0.188494	NA	2.8e-23	NA	2.8e-23	-9.94008	NA	3180	NA	0.000105661	NA	0.000105661	-0.113499	NA	4.97e-19	NA	4.97e-19	-8.9131	NA	3240	NA
ACAATCAT	ATGATTGT	0.000114347	7.24e-05	9.34e-05	-0.0329457	0.0259058	9.63e-20	4.68e-13	4.68e-13	-9.09336	7.23442	5345	5430	7.69e-06	1.4e-06	4.55e-06	-0.034661	0.0145827	0.0172647	0.3095	0.3095	-2.38103	1.01627	5410	5536	8.22e-09	2.41e-05	1.21e-05	0.000767489	-0.0410742	0.937326	2.04e-05	0.937326	0.0786306	-4.26017	5529	5634
ACAATCCC	NA	3.56e-05	NA	3.56e-05	-0.025865	NA	3.87e-07	NA	3.87e-07	-5.07538	NA	2572	NA	0.000267399	NA	0.000267399	-0.293474	NA	8.73e-45	NA	8.73e-45	-14.0421	NA	2547	NA	6.29e-05	NA	6.29e-05	-0.0976432	NA	6.1e-12	NA	6.1e-12	-6.87738	NA	2555	NA
ACAATCCT	AGGATTGT	0.000119134	0.000134363	0.000126749	-0.0402164	0.0419985	1.67e-20	6.4e-23	1.67e-20	-9.2818	9.85727	3619	3647	0.00130962	0.00138276	0.00134619	-0.54259	0.548857	4.24e-212	7.78e-224	4.24e-212	-31.092	31.9497	3650	3658	0.000390845	0.000469579	0.000430212	-0.201762	0.220034	7.06e-66	8.92e-79	7.06e-66	-17.145	18.7934	3731	3713
ACAATCTC	GAGATTGT	0.000559913	0.000489957	0.000524935	-0.0769013	0.0733037	4.57e-90	4.77e-79	4.77e-79	-20.1266	18.8267	4654	4652	3.1e-05	4.63e-05	3.87e-05	-0.0728374	0.0908583	1.75e-06	5.09e-09	1.75e-06	-4.78045	5.84421	4790	4776	8.85e-05	8.51e-05	8.68e-05	-0.0834554	0.0835084	3.49e-16	1.25e-15	1.25e-15	-8.15526	7.99971	4881	4860
ACAATGAA	TTCATTGT	0.000145995	0.000111429	0.000128712	-0.0316593	0.0276361	9.16e-25	2.8e-19	2.8e-19	-10.2752	8.9766	7290	7342	0.000990684	0.0010014	0.000996044	-0.333699	0.337488	6.33e-161	1.21e-162	6.33e-161	-27.038	27.1841	7417	7378	0.000288286	0.000306834	0.00029756	-0.120713	0.125243	4.6e-49	4.17e-52	4.6e-49	-14.7239	15.1903	7725	7683
ACAATGAG	CTCATTGT	0.000334024	0.000391356	0.00036269	-0.0505439	0.054337	1.8e-54	1.64e-63	1.8e-54	-15.5435	16.8252	6613	6721	0.000866955	0.000797993	0.000832474	-0.330194	0.315081	4.52e-141	5.27e-130	5.27e-130	-25.2918	24.2642	6709	6783	0.000359929	0.00027305	0.000316489	-0.144068	0.124935	8.23e-61	1.45e-46	1.45e-46	-16.4526	14.3294	6847	6920
ACAATTAA	TTAATTGT	0.000104636	0.000106234	0.000105435	-0.0310676	0.0312159	3.37e-18	1.87e-18	3.37e-18	-8.69862	8.7648	5439	5497	0.000718789	0.000944362	0.000831576	-0.326446	0.37416	2.71e-117	1.72e-153	2.71e-117	-23.0276	26.3977	5624	5666	0.00054684	0.000649361	0.0005981	-0.190216	0.206438	1.99e-91	3.27e-108	1.99e-91	-20.2814	22.1021	5909	5965
ACAATTAC	GTAATTGT	8.03e-05	3.49e-05	5.76e-05	-0.0350389	0.023105	2.54e-14	5.12e-07	5.12e-07	-7.61987	5.02174	3298	3249	0.000192179	0.000147683	0.000169931	-0.218545	0.192584	1.14e-32	1.72e-25	1.72e-25	-11.9039	10.4349	3372	3316	0.000131796	0.000119104	0.00012545	-0.121798	0.116075	2.41e-23	2.99e-21	2.99e-21	-9.95472	9.46319	3487	3441
ACAATTCA	TGAATTGT	0.000237355	0.000209182	0.000223269	-0.0465747	0.0435904	3.24e-39	9.16e-35	9.16e-35	-13.102	12.2997	5447	5517	0.000370167	0.000364648	0.000367407	-0.235598	0.233398	2.6e-61	2e-60	2e-60	-16.5223	16.3987	5526	5589	0.00033355	0.000303296	0.000318423	-0.151109	0.143757	1.74e-56	1.59e-51	1.59e-51	-15.8381	15.1025	5675	5735
ACAATTCT	NA	0.000104296	NA	0.000104296	-0.0317948	NA	3.81e-18	NA	3.81e-18	-8.68449	NA	5212	NA	7.64e-05	NA	7.64e-05	-0.109533	NA	6.06e-14	NA	6.06e-14	-7.50695	NA	5364	NA	7.61e-05	NA	7.61e-05	-0.0735782	NA	3.91e-14	NA	3.91e-14	-7.564	NA	5541	NA
ACAATTGC	GCAATTGT	8.08e-05	0.00014854	0.000114686	-0.0362037	0.0500325	2.09e-14	3.62e-25	2.09e-14	-7.64535	10.3643	3130	3021	0.000961234	0.00119016	0.0010757	-0.50774	0.576552	3.37e-156	6.22e-193	3.37e-156	-26.6327	29.6384	3146	3036	0.000372255	0.000502399	0.000437327	-0.213982	0.253532	7.85e-63	3.76e-84	7.85e-63	-16.7321	19.4394	3214	3105
ACACAAAA	TTTTGTGT	0.000105024	0.00013443	0.000119727	-0.0212683	0.0237264	2.92e-18	6.24e-23	2.92e-18	-8.71473	9.85971	11561	11846	0.00235208	0.00211309	0.00223259	-0.407138	0.381461	0	0	0	-41.6898	39.5104	11785	11986	0.00150869	0.00158573	0.00154721	-0.218603	0.221428	7.84e-249	1.94e-261	7.84e-249	-33.7037	34.5548	12243	12491
ACACAAAC	GTTTGTGT	0.00017737	0.000168388	0.000172879	-0.0364183	0.0361118	9.84e-30	2.6e-28	2.6e-28	-11.3257	11.0352	6064	6027	0.00207371	0.00212445	0.00209908	-0.516032	0.519022	0	0	0	-39.1397	39.6166	6126	6153	0.00108525	0.00108465	0.00108495	-0.250562	0.251024	1.52e-179	1.91e-179	1.91e-179	-28.5792	28.5713	6329	6318
ACACAAAG	CTTTGTGT	0.000201711	0.000177749	0.00018973	-0.0388346	0.0365852	1.39e-33	8.57e-30	8.57e-30	-12.078	11.3378	6606	6583	0.000539908	0.000467603	0.000503756	-0.25845	0.243988	1.41e-88	5.76e-77	5.76e-77	-19.9558	18.5709	6685	6519	0.00043666	0.000342193	0.000389427	-0.157442	0.140862	2.2e-73	6.65e-58	6.65e-58	-18.1224	16.042	6842	6700
ACACAAAT	ATTTGTGT	0.000245038	0.000222158	0.000233598	-0.0395223	0.0371866	1.98e-40	8.15e-37	8.15e-37	-13.3124	12.6756	7813	7989	0.000948191	0.00100076	0.000974475	-0.312907	0.31869	4.17e-154	1.53e-162	4.17e-154	-26.4512	27.1753	8018	8152	0.000794851	0.000785507	0.000790179	-0.192258	0.189772	5.04e-132	1.7e-130	1.7e-130	-24.4548	24.3106	8345	8449
ACACAACA	TGTTGTGT	0.000154243	0.000655308	0.000404776	-0.0371523	0.0662471	4.52e-26	4.35e-105	4.52e-26	-10.5615	21.7747	4998	7041	0.00192542	0.00206312	0.00199427	-0.570352	0.564038	6.38674431068159e-311	0	6.38674431068159e-311	-37.7115	39.0394	4883	4941	0.00148865	0.00168212	0.00158538	-0.336483	0.3423	1.49e-245	3.27e-277	1.49e-245	-33.4788	35.5912	5071	5141
ACACAACC	GGTTGTGT	2.26e-05	4.94e-05	3.6e-05	-0.0210164	0.0310393	5.35e-05	2.29e-09	5.35e-05	-4.03986	5.97575	2570	2564	0.000608159	0.000795821	0.00070199	-0.442028	0.509282	1.55e-99	1.18e-129	1.55e-99	-21.1803	24.2311	2613	2559	0.000308981	0.000331763	0.000320372	-0.213517	0.223518	1.85e-52	3.41e-56	1.85e-52	-15.2434	15.7956	2663	2595
ACACAACT	AGTTGTGT	6.61e-05	6.62e-05	6.62e-05	-0.0308146	0.0309186	4.66e-12	4.6e-12	4.66e-12	-6.91581	6.9176	3469	3483	0.0003573	0.000356752	0.000357026	-0.293976	0.294326	3.04e-59	3.72e-59	3.72e-59	-16.2325	16.2201	3472	3439	0.000301896	0.000209196	0.000255546	-0.181935	0.151612	2.69e-51	4.43e-36	4.43e-36	-15.0676	12.5421	3582	3563
ACACAAGA	TCTTGTGT	4.91e-05	5.02e-05	4.96e-05	-0.0245545	0.0244245	2.59e-09	1.69e-09	2.59e-09	-5.95563	6.02486	4108	4235	0.000277286	0.000394167	0.000335727	-0.236369	0.277681	2.24e-46	3.61e-65	2.24e-46	-14.2994	17.0498	4172	4286	0.000166289	0.000147942	0.000157115	-0.123617	0.115393	5.03e-29	5.27e-26	5.27e-26	-11.1819	10.5469	4287	4368
ACACAATA	TATTGTGT	0.000258433	0.000298913	0.000278673	-0.0503759	0.0548619	1.52e-42	6.21e-49	1.52e-42	-13.6716	14.7037	5054	4991	0.00211518	0.00174171	0.00192845	-0.582858	0.536588	0	1.95e-281	1.95e-281	-39.5299	35.864	5151	5068	0.0012332	0.00116283	0.00119802	-0.297378	0.292203	9.42e-204	3.07e-192	3.07e-192	-30.4673	29.5843	5403	5337
ACACAATC	GATTGTGT	0.000119035	0.000154339	0.000136687	-0.04219	0.0506983	1.73e-20	4.36e-26	1.73e-20	-9.27793	10.5647	3130	2985	0.000377181	0.000402508	0.000389845	-0.304725	0.334181	1.94e-62	1.65e-66	1.94e-62	-16.6782	17.2293	3170	2984	0.000275955	0.000370366	0.000323161	-0.176024	0.215683	4.85e-47	1.6e-62	4.85e-47	-14.4055	16.6896	3261	3085
ACACAATG	CATTGTGT	9.07e-05	8.22e-05	8.65e-05	-0.0317484	0.0299234	5.59e-16	1.24e-14	1.24e-14	-8.09812	7.71171	4532	4636	0.000246542	0.000272124	0.000259333	-0.211787	0.22065	1.99e-41	1.52e-45	1.99e-41	-13.4832	14.1656	4607	4705	0.000188907	0.000202761	0.000195834	-0.124641	0.128296	9.57e-33	5.05e-35	9.57e-33	-11.9183	12.3477	4769	4842
ACACACAA	TTGTGTGT	0.000193894	0.000362489	0.000278192	-0.0319567	0.0418365	2.39e-32	5.83e-59	2.39e-32	-11.8417	16.1925	8213	9390	0.00119143	0.00105055	0.00112099	-0.328714	0.306318	3.89e-193	1.57e-170	1.57e-170	-29.6542	27.8438	8401	8400	0.000991016	0.000956882	0.000973949	-0.200985	0.196633	4e-164	1.54e-158	1.54e-158	-27.3089	26.834	8685	8678
ACACACAC	GTGTGTGT	1.35e-05	3.97e-06	8.75e-06	-0.00107092	0.000596838	0.00176753	0.0902492	0.0902492	-3.12676	1.69409	12748	13173	0.00045489	0.000440293	0.000447592	-0.0253478	0.025127	6.34e-75	1.4e-72	1.4e-72	-18.3166	18.0202	13415	13367	0.000356607	0.000356943	0.000356775	-0.0151152	0.015265	2.88e-60	2.54e-60	2.88e-60	-16.3765	16.3842	13809	13720
ACACACAG	CTGTGTGT	5.73e-05	0.000101794	7.96e-05	-0.0164998	0.0224473	1.21e-10	9.53e-18	1.21e-10	-6.4383	8.57967	8260	8129	0.000567624	0.000615018	0.000591321	-0.211501	0.220521	5e-93	1.23e-100	5e-93	-20.4619	21.2995	8344	8330	0.000366819	0.000383742	0.000375281	-0.113786	0.11805	6.11e-62	1.03e-64	6.11e-62	-16.6094	16.9884	8495	8454
ACACACAT	ATGTGTGT	5.99e-05	8.37e-05	7.18e-05	-0.0136403	0.0166086	4.75e-11	7.15e-15	4.75e-11	-6.57868	7.78193	9760	9909	0.000902742	0.000867139	0.00088494	-0.214148	0.211713	8.18e-147	4.23e-141	4.23e-141	-25.8089	25.2944	10318	10411	0.000683712	0.000594236	0.000638974	-0.123879	0.117256	7.79e-114	3.45e-99	3.45e-99	-22.6795	21.1426	10661	10795
ACACACCA	TGGTGTGT	0.000142447	0.000177085	0.000159766	-0.0302061	0.034471	3.34e-24	1.09e-29	3.34e-24	-10.1495	11.3166	5432	5371	0.000403831	0.000314953	0.000359392	-0.221363	0.185351	1.01e-66	1.96e-52	1.96e-52	-17.2576	15.2399	5457	5487	0.000237948	0.000225899	0.000231924	-0.114572	0.107063	8.39e-41	7.99e-39	7.99e-39	-13.3765	13.0333	5526	5530
ACACACCT	AGGTGTGT	1.25e-05	5.24e-05	3.24e-05	0.0096899	-0.0211965	0.0026075	7.59e-10	0.0026075	3.01059	-6.15345	5014	5232	0.000321997	0.000247795	0.000284896	-0.214347	0.187732	1.44e-53	1.25e-41	1.25e-41	-15.4095	13.5174	5069	5329	0.000187145	0.00011238	0.000149763	-0.109053	0.0853407	1.86e-32	3.86e-20	3.86e-20	-11.8626	9.19216	5135	5409
ACACACTG	CAGTGTGT	3.73e-05	4.68e-05	4.2e-05	-0.0183846	0.0207764	2.1e-07	6.03e-09	2.1e-07	-5.19069	5.81602	5441	5432	3.35e-07	9.27e-08	2.14e-07	-0.00722183	-0.00378265	0.619435	0.793733	0.793733	-0.496651	-0.261466	5298	5375	6.96e-06	1.25e-06	4.11e-06	-0.0222815	0.00939136	0.0221432	0.332644	0.332644	-2.28791	0.968802	5427	5495
ACACAGAA	TTCTGTGT	9.86e-05	0.000103216	0.000100891	-0.0230584	0.0240784	3.11e-17	5.66e-18	3.11e-17	-8.44259	8.63939	8689	8807	0.00066187	0.000677093	0.000669482	-0.243345	0.250557	3.71e-108	1.34e-110	3.71e-108	-22.0964	22.3493	8746	8883	0.000385517	0.000359103	0.00037231	-0.125689	0.123187	5.27e-65	1.12e-60	1.12e-60	-17.0276	16.4337	8956	9102
ACACAGAC	GTCTGTGT	7.89e-05	0.000171137	0.000125	-0.0242462	0.0353198	4.3e-14	9.54e-29	4.3e-14	-7.55164	11.1249	5395	5500	0.00143864	0.00132777	0.0013832	-0.419741	0.400337	8.4e-233	5.19e-215	5.19e-215	-32.5898	31.307	5446	5553	0.000488966	0.00047356	0.000481263	-0.162363	0.160952	5.96e-82	1.99e-79	1.99e-79	-19.1776	18.8729	5564	5681
ACACAGAG	CTCTGTGT	1.15e-05	9.32e-05	5.23e-05	-0.00766753	0.0231303	0.00393396	2.25e-16	0.00393396	-2.88342	8.20824	9067	8186	0.000448234	0.000402634	0.000425434	-0.203734	0.195909	7.44e-74	1.58e-66	1.58e-66	-18.182	17.232	8178	8242	0.000145601	0.000113493	0.000129547	-0.0790271	0.0714353	1.28e-25	2.53e-20	2.53e-20	-10.4632	9.23758	8245	8253
ACACAGAT	ATCTGTGT	3.86e-05	7.4e-05	5.63e-05	-0.0183926	0.0259065	1.26e-07	2.58e-13	1.26e-07	-5.28529	7.31478	5566	5497	0.000221155	0.000235778	0.000228466	-0.176722	0.187301	2.44e-37	1.08e-39	2.44e-37	-12.7699	13.1855	5712	5592	0.000111094	0.000121861	0.000116478	-0.0849591	0.0908611	6.29e-20	1.05e-21	6.29e-20	-9.13944	9.57214	5838	5744
ACACAGCA	TGCTGTGT	2.05e-05	2.29e-05	2.17e-05	-0.0111042	0.0121328	0.000116464	4.8e-05	0.000116464	-3.85347	4.06533	7461	7723	0.000377557	0.000493698	0.000435627	-0.193529	0.22934	1.69e-62	3.71e-81	1.69e-62	-16.6865	19.0823	7527	7754	0.000172969	0.000249824	0.000211396	-0.0891201	0.110858	4e-30	9.42e-43	4e-30	-11.4044	13.7063	7624	7864
ACACAGCC	GGCTGTGT	6.67e-05	0.000108616	8.76e-05	-0.0242539	0.0316695	3.86e-12	7.84e-19	3.86e-12	-6.94236	8.86254	5546	5424	0.00038517	0.000472086	0.000428628	-0.235115	0.267488	1.01e-63	1.1e-77	1.01e-63	-16.854	18.6597	5624	5491	0.000226633	0.000253623	0.000240128	-0.123034	0.133868	6.05e-39	2.24e-43	6.05e-39	-13.0545	13.8102	5644	5502
ACACAGCT	AGCTGTGT	4.93e-05	3.12e-05	4.02e-05	-0.0202784	0.0161467	2.4e-09	2.05e-06	2.05e-06	-5.96825	4.74845	5912	6035	0.000240223	0.00028677	0.000263496	-0.180954	0.198279	2.07e-40	6.67e-48	2.07e-40	-13.3092	14.5419	5980	6130	0.000131141	0.000133668	0.000132405	-0.091212	0.0922552	3.09e-23	1.19e-23	3.09e-23	-9.92996	10.0252	6031	6186
ACACAGGA	TCCTGTGT	0.00015555	0.000194326	0.000174938	-0.0345187	0.0386085	2.8e-26	2.05e-32	2.8e-26	-10.6061	11.8548	6494	6572	0.000251085	0.000274113	0.000262599	-0.176808	0.179111	3.69e-42	7.26e-46	3.69e-42	-13.6068	14.2173	6661	6753	6.13e-05	8.28e-05	7.21e-05	-0.0594945	0.0670905	1.11e-11	2.98e-15	1.11e-11	-6.79152	7.89207	6735	6813
ACACAGGC	GCCTGTGT	4.2e-05	4.28e-05	4.24e-05	-0.0218584	0.0214458	3.59e-08	2.62e-08	3.59e-08	-5.50976	5.56514	4399	4400	0.000273488	0.000226262	0.000249875	-0.222472	0.19159	9.15e-46	3.66e-38	3.66e-38	-14.2011	12.9166	4524	4538	8.76e-05	0.000100686	9.42e-05	-0.0858795	0.0871062	4.81e-16	3.3e-18	4.81e-16	-8.11639	8.70072	4554	4574
ACACAGGG	CCCTGTGT	0.000221864	0.000199492	0.000210678	-0.0449538	0.0428931	9.07e-37	3.12e-33	3.12e-33	-12.6672	12.0114	5464	5335	5.88e-05	2.99e-05	4.44e-05	-0.0936888	0.0669714	4.53e-11	2.67e-06	2.67e-06	-6.58583	4.69454	5559	5454	1.67e-05	2.77e-05	2.22e-05	-0.0342035	0.0440232	0.00039592	4.99e-06	0.00039592	-3.5428	4.56507	5561	5483
ACACAGTG	CACTGTGT	0.000173234	0.000112633	0.000142933	0.0346007	-0.0280755	4.44e-29	1.8e-19	1.8e-19	11.1929	-9.02494	7191	7228	3.1e-05	6.31e-05	4.7e-05	-0.058682	0.0839536	1.78e-06	9.05e-12	1.78e-06	-4.77696	6.821	7396	7445	6.32e-07	2.4e-06	1.51e-06	-0.0057058	0.0112122	0.490669	0.179366	0.490669	-0.689245	1.34271	7484	7510
ACACATAA	TTATGTGT	0.000197079	0.000184179	0.000190629	-0.0398825	0.0385165	7.51e-33	8.24e-31	8.24e-31	-11.9385	11.5411	6164	6185	0.00197868	0.00198558	0.00198213	-0.511712	0.510379	1.80739094561645e-319	1.41203961581428e-320	1.80739094561645e-319	-38.2305	38.2973	6277	6325	0.0010622	0.00108414	0.00107317	-0.25145	0.252926	9e-176	2.31e-179	9e-176	-28.2737	28.5646	6510	6582
ACACATAC	GTATGTGT	5.79e-05	8.03e-05	6.91e-05	-0.0184136	0.0215005	9.76e-11	2.56e-14	9.76e-11	-6.47076	7.61899	6181	6133	0.000983752	0.00115474	0.00106925	-0.309604	0.328127	8.2e-160	3e-187	8.2e-160	-26.9432	29.1935	6420	6431	0.000572629	0.00067817	0.000625399	-0.156069	0.169169	1.19e-95	6.29e-113	1.19e-95	-20.7544	22.5874	6689	6681
ACACATAG	CTATGTGT	0.000223636	0.00017905	0.000201343	-0.0509478	0.0448725	4.76e-37	5.34e-30	5.34e-30	-12.7177	11.3793	4254	4307	0.00139829	0.00146968	0.00143398	-0.513833	0.519983	2.51e-226	8.79e-238	2.51e-226	-32.1288	32.9399	4297	4317	0.000658192	0.000611354	0.000634773	-0.236937	0.226576	1.17e-109	5.44e-102	5.44e-102	-22.252	21.4451	4465	4503
ACACATAT	NA	6.8e-05	NA	6.8e-05	-0.0190449	NA	2.33e-12	NA	2.33e-12	-7.01304	NA	7140	NA	0.000194486	NA	0.000194486	-0.117469	NA	4.83e-33	NA	4.83e-33	-11.9751	NA	7820	NA	0.000173296	NA	0.000173296	-0.0721803	NA	3.53e-30	NA	3.53e-30	-11.4151	NA	8219	NA
ACACATCA	TGATGTGT	5.03e-05	0.000317713	0.00018401	-0.0232759	0.0519784	1.63e-09	6.72e-52	1.63e-09	-6.03127	15.1591	4275	5779	0.000245886	0.000279803	0.000262844	-0.216515	0.231765	2.53e-41	8.82e-47	2.53e-41	-13.4652	14.3641	4240	4306	0.000296319	0.000319287	0.000307803	-0.159556	0.167522	2.21e-50	3.79e-54	2.21e-50	-14.9277	15.4956	4358	4409
ACACATCC	GGATGTGT	1.94e-05	1.65e-05	1.8e-05	-0.0170985	0.0156681	0.000178592	0.000548619	0.000548619	-3.74754	3.45584	3183	3280	0.000215653	0.000246725	0.000231189	-0.2305	0.246928	1.87e-36	1.86e-41	1.87e-36	-12.6101	13.4882	3235	3321	0.000208131	0.000224496	0.000216313	-0.154048	0.159729	6.62e-36	1.36e-38	6.62e-36	-12.5102	12.9928	3274	3350
ACACATCT	AGATGTGT	8.8e-06	4.31e-05	2.6e-05	-0.00954531	0.0210492	0.0116295	2.37e-08	0.0116295	-2.5232	5.58264	4812	4919	0.000924451	0.000966129	0.00094529	-0.396965	0.402339	2.69e-150	5.52e-157	2.69e-150	-26.1177	26.7005	4864	4976	0.00033427	0.000320832	0.000327551	-0.161472	0.156498	1.32e-56	2.11e-54	2.11e-54	-15.8551	15.5331	4983	5120
ACACATGA	TCATGTGT	7.73e-05	0.000119746	9.85e-05	-0.0282931	0.0350776	7.51e-14	1.34e-20	7.51e-14	-7.47872	9.30561	4870	4903	0.000814918	0.000734133	0.000774526	-0.372511	0.35204	1.01e-132	9.35e-120	9.35e-120	-24.5203	23.2723	4931	4978	0.000313384	0.000227842	0.000270613	-0.156235	0.132858	3.52e-53	3.83e-39	3.83e-39	-15.3517	13.0893	5049	5080
ACACATGG	CCATGTGT	0.000251088	0.000313245	0.000282167	-0.0486336	0.0538718	2.2e-41	3.4e-51	2.2e-41	-13.4758	15.0521	5288	5372	0.000220324	0.000284886	0.000252605	-0.18451	0.207771	3.32e-37	1.34e-47	3.32e-37	-12.7459	14.4941	5378	5471	0.000106243	0.000146916	0.00012658	-0.0870943	0.101789	3.98e-19	7.78e-26	3.98e-19	-8.93764	10.5103	5448	5507
ACACATTA	TAATGTGT	6.44e-05	6.24e-05	6.34e-05	-0.0269517	0.0262552	8.78e-12	1.83e-11	1.83e-11	-6.82526	6.71926	4410	4542	0.000276523	0.00022418	0.000250352	-0.223389	0.199891	2.97e-46	7.93e-38	7.93e-38	-14.2797	12.857	4600	4681	0.00021591	0.00025036	0.000233135	-0.132132	0.14105	3.49e-37	7.69e-43	3.49e-37	-12.7418	13.721	4805	4925
ACACATTC	GAATGTGT	0.000115745	7.89e-05	9.73e-05	-0.0333385	0.0276971	5.77e-20	4.26e-14	4.26e-14	-9.14879	7.55297	4945	4916	0.00106366	0.0010913	0.00107748	-0.41749	0.426143	1.24e-172	4.54e-177	1.24e-172	-28.0172	28.3793	4903	4857	0.000943661	0.000929487	0.000936574	-0.264332	0.263475	2.24e-156	4.68e-154	4.68e-154	-26.6478	26.4468	5068	5022
ACACCAAA	TTTGGTGT	0.000182084	0.000247921	0.000215003	-0.0392275	0.0451139	1.77e-30	6.95e-41	1.77e-30	-11.4753	13.3905	5987	6093	0.00375848	0.00348278	0.00362063	-0.726821	0.692563	0	0	0	-52.7371	50.759	5992	6062	0.00124143	0.00113114	0.00118629	-0.281997	0.265102	4.24e-205	4.72e-187	4.72e-187	-30.5689	29.1778	6159	6271
ACACCAAC	GTTGGTGT	0.000125462	0.000111452	0.000118457	-0.0450576	0.0420984	1.65e-21	2.78e-19	2.78e-19	-9.52514	8.97753	3049	3098	0.001051	0.000963819	0.00100741	-0.527529	0.498063	1.33e-170	1.3e-156	1.3e-156	-27.8498	26.6686	3151	3216	0.000707803	0.000560384	0.000634093	-0.292014	0.257295	8.88e-118	1.2e-93	1.2e-93	-23.0759	20.5312	3201	3260
ACACCAAT	ATTGGTGT	7.05e-05	8.32e-05	7.69e-05	-0.0313762	0.0336703	9.31e-13	8.68e-15	9.31e-13	-7.14048	7.75735	3378	3348	0.000203198	0.000289963	0.00024658	-0.2212	0.263154	1.91e-34	2.05e-48	1.91e-34	-12.2404	14.6227	3352	3317	0.000411094	0.000459166	0.00043513	-0.214973	0.22709	3.39e-69	4.53e-77	3.39e-69	-17.5837	18.5838	3410	3373
ACACCACA	TGTGGTGT	8.43e-05	0.000167818	0.000126081	-0.0233677	0.0338669	5.74e-15	3.2e-28	5.74e-15	-7.80966	11.0165	5125	5038	0.00160999	0.00128627	0.00144813	-0.465315	0.382225	2.68e-260	2.36e-208	2.36e-208	-34.4789	30.8133	5037	4967	0.000808198	0.000596432	0.000702315	-0.220197	0.17552	3.3e-134	1.51e-99	1.51e-99	-24.6595	21.1816	5182	5090
ACACCACC	GGTGGTGT	0.000130226	0.000160969	0.000145598	-0.0372837	0.0414156	2.9e-22	3.88e-27	2.9e-22	-9.70432	10.7893	4643	4704	0.000155024	0.000172417	0.000163721	-0.163992	0.171057	1.12e-26	1.75e-29	1.12e-26	-10.6912	11.2751	4775	4852	0.000129201	9.18e-05	0.000110483	-0.101812	0.0851946	6.46e-23	9.89e-17	9.89e-17	-9.85623	8.30631	4812	4877
ACACCACT	AGTGGTGT	0.000334589	0.000243933	0.000289261	0.0553988	-0.0482786	1.46e-54	2.96e-40	2.96e-40	15.5566	-13.2824	5429	5299	0.000219614	0.000192931	0.000206273	-0.180761	0.172396	4.31e-37	8.61e-33	8.61e-33	-12.7254	11.9271	5583	5484	0.000111969	9.07e-05	0.000101341	-0.0879067	0.0805694	4.51e-20	1.48e-16	1.48e-16	-9.17536	8.25853	5633	5530
ACACCAGT	ACTGGTGT	2.74e-06	8.88e-07	1.82e-06	-0.00607971	0.00340401	0.15907	0.422984	0.422984	-1.40821	0.801256	3689	3775	0.000456114	0.00037618	0.000416147	-0.319266	0.285902	4.03e-75	2.81e-62	2.81e-62	-18.3412	16.656	3727	3782	0.000241142	0.000224125	0.000232634	-0.158133	0.149989	2.51e-41	1.56e-38	1.56e-38	-13.466	12.982	3760	3834
ACACCATA	TATGGTGT	3.19e-05	6.47e-05	4.83e-05	-0.0243231	0.0347412	1.58e-06	7.96e-12	1.58e-06	-4.80127	6.83934	2660	2636	0.000261096	0.000316201	0.000288649	-0.285681	0.311942	9.03e-44	1.23e-52	9.03e-44	-13.8755	15.2701	2653	2681	0.000132586	0.000176774	0.00015468	-0.135824	0.156886	1.79e-23	9.46e-31	1.79e-23	-9.98451	11.5291	2773	2764
ACACCATG	CATGGTGT	0.000193721	0.000251649	0.000222685	-0.0448054	0.0514637	2.55e-32	1.79e-41	2.55e-32	-11.8364	13.4909	4825	4818	0.000200104	0.00020744	0.000203772	-0.185152	0.18951	6.01e-34	3.95e-35	6.01e-34	-12.1469	12.3675	4868	4882	3.16e-05	6.59e-05	4.87e-05	-0.0500201	0.0726892	1.11e-06	1.97e-12	1.11e-06	-4.87115	7.03656	4926	4932
ACACCCAG	CTGGGTGT	0.000652164	0.000529766	0.000590965	-0.063888	0.0570822	1.36e-104	2.56e-85	2.56e-85	-21.7224	19.5769	7825	7744	5.37e-05	8.92e-05	7.14e-05	-0.0724943	0.0937021	3.13e-10	5.12e-16	3.13e-10	-6.29227	8.10881	8162	8042	5.02e-05	7.65e-05	6.34e-05	-0.0479148	0.0593435	7.95e-10	3.38e-14	7.95e-10	-6.14599	7.58283	8188	8056
ACACCCCA	TGGGGTGT	3.95e-07	1.22e-08	2.04e-07	-0.00223693	-0.000388319	0.593072	0.92515	0.92515	-0.534389	-0.0939481	3686	3770	0.00144903	0.00131098	0.00138001	-0.559108	0.517302	1.81e-234	2.56e-212	2.56e-212	-32.7074	31.1082	3727	3805	0.000519891	0.000642168	0.000581029	-0.227827	0.245775	5.14e-87	4.92e-107	5.14e-87	-19.7751	21.9792	3769	3877
ACACCCGG	CCGGGTGT	0.000577617	0.000684589	0.000631103	-0.113628	0.126254	7.45e-93	1.07e-109	7.45e-93	-20.4425	22.2562	2252	2145	1.59e-06	7.17e-07	1.16e-06	-0.023711	0.016284	0.278514	0.46713	0.46713	-1.08366	0.727158	2375	2253	9.01e-05	5.7e-05	7.35e-05	-0.122172	0.0993991	1.84e-16	6e-11	6e-11	-8.2325	6.54394	2371	2249
ACACCCTA	TAGGGTGT	1.29e-05	6.2e-05	3.74e-05	-0.0176748	0.0379198	0.00229092	2.16e-11	0.00229092	-3.04968	6.69471	2082	2141	0.00127616	0.00155599	0.00141608	-0.727312	0.797291	9.89e-207	1.24e-251	9.89e-207	-30.6918	33.8949	2031	2021	0.000700726	0.000878343	0.000789534	-0.362915	0.401518	1.28e-116	1.09e-145	1.28e-116	-22.9602	25.7082	2099	2102
ACACCCTC	GAGGGTGT	1.16e-07	2.2e-06	1.16e-06	0.00132963	-0.00576087	0.771888	0.207325	0.771888	0.289907	-1.26096	3190	3305	0.000624144	0.000445501	0.000534823	-0.385202	0.331971	4.22e-102	2.04e-73	2.04e-73	-21.4571	18.1265	3287	3368	0.000210073	0.000192901	0.000201487	-0.152647	0.149306	3.18e-36	2.11e-33	2.11e-33	-12.5684	12.0436	3293	3377
ACACCTAC	GTAGGTGT	2.32e-05	4.59e-06	1.39e-05	-0.0218587	0.00937239	4.22e-05	0.0685536	0.0685536	-4.09535	1.82135	2326	2462	0.000380272	0.000372326	0.000376299	-0.36597	0.347985	6.18e-63	1.17e-61	1.17e-61	-16.7464	16.5705	2374	2483	0.000140072	0.000130678	0.000135375	-0.150624	0.139719	1.04e-24	3.69e-23	3.69e-23	-10.2625	9.9124	2422	2535
ACACCTAT	ATAGGTGT	1.39e-05	1.89e-05	1.64e-05	0.0140242	-0.0168616	0.00152522	0.000219963	0.00152522	3.16985	-3.69493	3356	3353	0.0002722	0.00025729	0.000264745	-0.256563	0.252252	1.47e-45	3.7e-43	3.7e-43	-14.1676	13.774	3374	3392	0.000161541	0.000141379	0.00015146	-0.132257	0.126485	3.04e-28	6.35e-25	6.35e-25	-11.0211	10.3103	3489	3471
ACACCTCA	TGAGGTGT	1.55e-05	1.04e-05	1.29e-05	-0.0150845	0.0120887	0.00082583	0.00612517	0.00612517	-3.344	2.74101	3405	3487	0.00032789	0.000393498	0.000360694	-0.282973	0.302444	1.63e-54	4.63e-65	1.63e-54	-15.5499	17.0353	3423	3518	0.00019917	0.00018893	0.00019405	-0.149894	0.142807	1.97e-34	9.48e-33	9.48e-33	-12.2378	11.919	3472	3550
ACACCTCT	AGAGGTGT	5.37e-08	1.18e-07	8.56e-08	-0.000851324	-0.00125429	0.843852	0.770552	0.843852	-0.196968	-0.291653	3733	3739	0.00083871	0.000890262	0.000864486	-0.430653	0.442999	1.54e-136	8.23e-145	1.54e-136	-24.876	25.6298	3781	3776	0.000311888	0.000325197	0.000318543	-0.178947	0.182327	6.19e-53	4.06e-55	6.19e-53	-15.315	15.6384	3815	3818
ACACCTGG	CCAGGTGT	0.000566911	0.000575359	0.000571135	-0.0608393	0.0605758	3.62e-91	1.69e-92	3.62e-91	-20.252	20.4024	7568	7511	1.34e-06	5.35e-06	3.34e-06	-0.0118386	0.0233425	0.320436	0.0470864	0.320436	-0.993563	1.98553	7860	7770	1.1e-05	1.23e-05	1.16e-05	-0.0232011	0.0242413	0.00401486	0.00239606	0.00401486	-2.877	3.03618	7881	7782
ACACCTGT	ACAGGTGT	0.0020291	0.00225977	0.00214444	0.0888812	-0.0945166	2.52961610670718e-321	0	2.52961610670718e-321	38.3426	-40.468	12086	12215	4.22e-05	2.66e-05	3.44e-05	-0.0512606	0.0408789	2.46e-08	9.32e-06	9.32e-06	-5.57587	4.43239	12559	12800	2e-05	4.97e-05	3.48e-05	0.0240912	-0.0381426	0.00010719	9.66e-10	0.00010719	3.87373	-6.11505	12604	12851
ACACCTTA	TAAGGTGT	7.14e-05	6e-05	6.57e-05	-0.0366515	0.0334733	6.75e-13	4.57e-11	4.57e-11	-7.18455	6.58437	2714	2719	0.00287805	0.00244903	0.00266354	-0.948718	0.878356	0	0	0	-46.1283	42.5424	2717	2683	0.000592243	0.000516165	0.000554204	-0.289813	0.270988	7.32e-99	2.09e-86	2.09e-86	-21.1071	19.7041	2804	2784
ACACGCCA	TGGCGTGT	5.31e-05	8.78e-05	7.05e-05	-0.0525406	0.0689275	5.69e-10	1.6e-15	5.69e-10	-6.19897	7.96951	925	936	3.65e-05	2.14e-05	2.9e-05	-0.174658	0.136959	2.12e-07	7.03e-05	7.03e-05	-5.18817	3.9753	960	964	2.86e-05	1.44e-05	2.15e-05	-0.105682	0.0767872	3.58e-06	0.0010129	0.0010129	-4.63427	3.28693	961	963
ACACGCCT	AGGCGTGT	0.0001231	0.00014501	0.000134055	0.0674253	-0.0764151	3.92e-21	1.31e-24	3.92e-21	9.43504	-10.2404	1382	1264	2.11e-05	1.69e-05	1.9e-05	-0.111643	0.104459	8.03e-05	0.000408336	0.000408336	-3.94365	3.53465	1439	1317	4.07e-06	2.24e-10	2.03e-06	-0.0335542	0.000260287	0.0804185	0.989647	0.989647	-1.74827	0.012976	1438	1313
ACACGGTG	CACCGTGT	0.00123379	0.00127536	0.00125457	0.136343	-0.137301	3.88e-196	1.11e-202	3.88e-196	29.8866	-30.3866	3358	3414	8.43e-07	6.01e-06	3.43e-06	0.0141743	-0.0375717	0.430568	0.0352255	0.430568	0.78822	-2.10576	3543	3620	0.000227617	0.00026527	0.000246443	0.159643	-0.171157	4.17e-39	2.75e-45	4.17e-39	13.0828	-14.1238	3533	3600
ACACTAAA	TTTAGTGT	0.000129224	8.18e-05	0.000105499	-0.0396513	0.0310024	4.18e-22	1.48e-14	1.48e-14	-9.66691	7.6898	4139	4265	0.000203727	0.000232039	0.000217883	-0.199381	0.209948	1.57e-34	4.3e-39	1.57e-34	-12.2563	13.0805	4288	4407	0.000154375	0.0001377	0.000146038	-0.116237	0.108263	4.59e-27	2.57e-24	2.57e-24	-10.7739	10.1753	4474	4606
ACACTACA	TGTAGTGT	8.19e-05	7.14e-05	7.67e-05	-0.0381311	0.0358304	1.39e-14	6.74e-13	6.74e-13	-7.69758	7.18469	2631	2689	0.000318232	0.00032008	0.000319156	-0.305581	0.307377	5.81e-53	2.93e-53	5.81e-53	-15.3191	15.3635	2693	2710	8.59e-05	0.00017219	0.000129033	-0.106365	0.151198	9.34e-16	5.37e-30	9.34e-16	-8.03536	11.3786	2771	2816
ACACTACC	GGTAGTGT	4.62e-05	9.91e-05	7.26e-05	-0.0317505	0.0502636	7.51e-09	2.56e-17	7.51e-09	-5.77926	8.46533	2006	1993	0.00128506	0.00119228	0.00123867	-0.687566	0.717415	3.69e-208	2.85e-193	2.85e-193	-30.7988	29.6647	1978	1960	0.000279926	0.000200188	0.000240057	-0.21518	0.196911	1.08e-47	1.34e-34	1.34e-34	-14.5088	12.2691	2072	2047
ACACTCCA	NA	7.93e-05	NA	7.93e-05	0.0288856	NA	3.67e-14	NA	3.67e-14	7.57218	NA	4477	NA	0.000167657	NA	0.000167657	-0.168412	NA	1.03e-28	NA	1.03e-28	-11.1183	NA	4599	NA	6.65e-05	NA	6.65e-05	-0.072309	NA	1.53e-12	NA	1.53e-12	-7.07204	NA	4637	NA
ACACTCCT	AGGAGTGT	9.23e-08	6.46e-06	3.27e-06	-0.00109508	0.00933192	0.796145	0.0307112	0.796145	-0.258339	2.1608	3832	3626	0.000256087	0.000290561	0.000273324	-0.244268	0.256472	5.78e-43	1.64e-48	5.78e-43	-13.7417	14.6377	3561	3596	0.000242274	0.000242867	0.00024257	-0.161229	0.159675	1.63e-41	1.31e-41	1.63e-41	-13.4975	13.5141	3625	3634
ACACTGCT	AGCAGTGT	2.33e-05	8.1e-06	1.57e-05	-0.014686	0.00861489	4.01e-05	0.0155182	0.0155182	-4.10692	2.42006	5451	5497	8.8e-06	3.88e-06	6.34e-06	0.0371114	-0.0246205	0.0108828	0.0905945	0.0905945	2.54645	-1.69227	5358	5372	2.53e-05	3.19e-06	1.42e-05	0.0424961	-0.0150908	1.29e-05	0.121675	0.121675	4.36136	-1.54778	5503	5494
ACACTGGG	CCCAGTGT	0.000149771	0.000145649	0.00014771	-0.038485	0.0378353	2.31e-25	1.04e-24	1.04e-24	-10.4072	10.263	5118	5124	5.53e-05	0.000111385	8.33e-05	-0.0942999	0.133612	1.71e-10	1.28e-19	1.71e-10	-6.3854	9.06211	5237	5233	4.11e-05	4.36e-05	4.23e-05	-0.055468	0.0570928	2.77e-08	1.02e-08	2.77e-08	-5.55566	5.72753	5263	5259
ACACTTCT	AGAAGTGT	1.86e-05	1.96e-05	1.91e-05	-0.0135002	0.0135423	0.000245543	0.000168407	0.000245543	-3.66688	3.76225	5159	5401	0.000963042	0.000854133	0.000908588	-0.395168	0.365882	1.73e-156	5.16e-139	5.16e-139	-26.6578	25.1039	5197	5385	0.000241139	0.0002367	0.00023892	-0.133812	0.130551	2.51e-41	1.34e-40	1.34e-40	-13.4659	13.3413	5315	5486
ACACTTTG	CAAAGTGT	0.000339714	0.000298806	0.00031926	0.0500404	-0.048155	2.28e-55	6.45e-49	6.45e-49	15.6754	-14.701	6794	6454	4.6e-06	4.37e-06	4.48e-06	-0.024254	0.0236876	0.0655676	0.0727042	0.0727042	-1.84137	1.79469	6601	6548	5.87e-06	2.95e-06	4.41e-06	0.0186398	-0.0132092	0.0356413	0.136112	0.136112	2.101	-1.49043	6681	6673
ACAGAAAA	TTTTCTGT	0.000387947	0.000399667	0.000393807	-0.0342311	0.0346662	5.66e-63	8.04e-65	5.66e-63	-16.7517	17.0029	16265	16475	0.0014876	0.00156817	0.00152788	-0.270327	0.276974	1.17e-240	1.38e-253	1.17e-240	-33.1405	34.0274	16704	16826	0.000819161	0.000886294	0.000852728	-0.135328	0.140187	5.29e-136	5.47e-147	5.29e-136	-24.8263	25.8244	17174	17411
ACAGAAAC	GTTTCTGT	0.000130645	8.42e-05	0.000107403	-0.029666	0.0246518	2.49e-22	6.14e-15	6.14e-15	-9.71992	7.80117	6775	6877	0.000585345	0.000513512	0.000549429	-0.255626	0.247124	7.14e-96	2.44e-84	2.44e-84	-20.779	19.4616	6822	6945	0.000237074	0.000189646	0.00021336	-0.110091	0.101461	1.17e-40	7.23e-33	7.23e-33	-13.3519	11.9416	6992	7123
ACAGAAAG	CTTTCTGT	0.000244227	0.00026653	0.000255378	-0.0347682	0.0356126	2.66e-40	8.01e-44	2.66e-40	-13.2904	13.8841	10024	10516	0.000780816	0.000766737	0.000773776	-0.251749	0.250141	3.01e-127	5.47e-125	5.47e-125	-24.0014	23.7838	10164	10198	0.000368714	0.000361209	0.000364962	-0.1172	0.115646	2.99e-62	5.08e-61	5.08e-61	-16.6523	16.4819	10380	10441
ACAGAAAT	ATTTCTGT	0.000164738	0.000158776	0.000161757	-0.0270221	0.0262883	9.83e-28	8.64e-27	8.64e-27	-10.9149	10.7156	11377	11532	0.00161866	0.00176275	0.00169071	-0.345433	0.356673	1.09e-261	8.18e-285	1.09e-261	-34.5718	36.0804	11391	11578	0.00107319	0.000982047	0.00102762	-0.188532	0.178756	1.43e-177	1.17e-162	1.17e-162	-28.4198	27.185	11870	12039
ACAGAACA	TGTTCTGT	0.000154932	0.000207258	0.000181095	-0.0321562	0.0366743	3.51e-26	1.85e-34	3.51e-26	-10.585	12.243	7388	7600	0.00311831	0.00289068	0.0030045	-0.588722	0.559966	0	0	0	-48.0209	46.2297	7358	7576	0.000663006	0.000621222	0.000642114	-0.183096	0.174617	1.91e-110	1.32e-103	1.32e-103	-22.3332	21.6176	7579	7835
ACAGAACC	GGTTCTGT	3.27e-05	3.36e-05	3.31e-05	-0.0211594	0.0211288	1.15e-06	8.33e-07	1.15e-06	-4.86358	4.92749	3668	3790	0.000567154	0.000490219	0.000528687	-0.356163	0.325025	5.94e-93	1.34e-80	1.34e-80	-20.4534	19.0149	3743	3829	0.000305016	0.000282909	0.000293963	-0.177968	0.168204	8.29e-52	3.5e-48	3.5e-48	-15.1453	14.5859	3777	3866
ACAGAACT	NA	0.000119075	NA	0.000119075	-0.032005	NA	1.71e-20	NA	1.71e-20	-9.27947	NA	5884	NA	0.0015582	NA	0.0015582	-0.477966	NA	5.5e-252	NA	5.5e-252	-33.9189	NA	5746	NA	0.000682271	NA	0.000682271	-0.213231	NA	1.34e-113	NA	1.34e-113	-22.6556	NA	5922	NA
ACAGAAGA	TCTTCTGT	7.31e-06	5.19e-05	2.96e-05	0.00610538	0.0180631	0.0215279	9.08e-10	0.0215279	2.2986	6.1248	9880	7981	0.0001888	0.000240392	0.000214596	-0.139171	0.158082	3.99e-32	1.94e-40	3.99e-32	-11.7987	13.3139	8124	8045	1.2e-06	1.28e-05	7.02e-06	-0.00752039	0.0247308	0.341512	0.00188739	0.341512	-0.951182	3.10741	8301	8226
ACAGAATA	TATTCTGT	0.000254124	0.0002275	0.000240812	-0.040926	0.0389927	7.28e-42	1.17e-37	1.17e-37	-13.5571	12.8271	7540	7499	0.00181449	0.00199678	0.00190563	-0.446352	0.470627	4.07e-293	2.27270197086973e-322	4.07e-293	-36.607	38.4053	7535	7522	0.00107121	0.00106136	0.00106628	-0.228952	0.229197	3.02e-177	1.24e-175	1.24e-175	-28.3935	28.2625	7928	7895
ACAGAATG	CATTCTGT	4.38e-06	2.9e-05	1.67e-05	0.00520772	0.0139129	0.0752234	4.62e-06	0.0752234	1.7791	4.58149	8124	7554	0.000803992	0.000766317	0.000785155	-0.298029	0.290431	5.75e-131	6.39e-125	6.39e-125	-24.3553	23.7773	7570	7617	0.000127486	9.88e-05	0.000113132	-0.0801812	0.0706411	1.24e-22	6.83e-18	6.83e-18	-9.79055	8.61794	7774	7778
ACAGACAA	TTGTCTGT	0.000264478	0.000293171	0.000278825	-0.0446274	0.0460584	1.69e-43	5e-48	1.69e-43	-13.8306	14.5617	6669	6820	0.0029552	0.00317455	0.00306487	-0.612187	0.625834	0	0	0	-46.7443	48.4533	6598	6695	0.00116752	0.00120164	0.00118458	-0.259425	0.25973	5.26e-193	1.37e-198	5.26e-193	-29.6439	30.0744	6790	6870
ACAGACAC	GTGTCTGT	0.00018675	0.000284858	0.000235804	-0.0320501	0.0402517	3.23e-31	1.02e-46	3.23e-31	-11.6214	14.3537	7181	7160	0.0023907	0.0022949	0.0023428	-0.465346	0.464785	0	0	0	-42.0315	41.1787	7213	7209	0.000697159	0.00062341	0.000660284	-0.166763	0.16404	4.91e-116	5.79e-104	5.79e-104	-22.9016	21.6557	7335	7348
ACAGACAT	ATGTCTGT	0.000262381	0.000197662	0.000230021	-0.0458124	0.0392595	3.62e-43	6.07e-33	6.07e-33	-13.7756	11.9562	6309	6422	0.000291621	0.000347342	0.000319481	-0.195122	0.209875	1.11e-48	1.21e-57	1.11e-48	-14.6644	16.0047	6438	6581	0.000106646	0.000128056	0.000117351	-0.079829	0.0860731	3.42e-19	9.98e-23	3.42e-19	-8.95458	9.81244	6584	6733
ACAGACCA	TGGTCTGT	4.26e-05	7.14e-05	5.7e-05	-0.022981	0.0292566	2.9e-08	6.67e-13	2.9e-08	-5.54729	7.18623	3968	3977	0.000814119	0.000884696	0.000849407	-0.410745	0.420918	1.36e-132	6.44e-144	1.36e-132	-24.5083	25.5494	3969	3973	0.000340211	0.000303721	0.000321966	-0.179734	0.167215	1.4e-57	1.35e-51	1.35e-51	-15.9955	15.1131	4055	4054
ACAGACCT	AGGTCTGT	5.43e-06	3.54e-05	2.04e-05	-0.00866561	0.0219148	0.0474766	4.14e-07	0.0474766	-1.98203	5.06245	3617	3731	0.000198531	0.000211776	0.000205153	-0.213405	0.217842	1.08e-33	7.9e-36	1.08e-33	-12.099	12.4962	3636	3761	5.38e-05	8.62e-05	7e-05	-0.0755231	0.0946225	2.05e-10	8.41e-16	2.05e-10	-6.35801	8.04833	3681	3796
ACAGAGAA	TTCTCTGT	7.4e-05	9.52e-05	8.46e-05	-0.0187286	0.0207056	2.6e-13	1.07e-16	2.6e-13	-7.31353	8.29711	10444	10977	0.000664291	0.000711149	0.00068772	-0.227882	0.233066	1.52e-108	4.57e-116	1.52e-108	-22.1368	22.9048	10571	10797	8.84e-05	0.000130234	0.000109304	-0.0563475	0.0676883	3.6e-16	4.37e-23	3.6e-16	-8.15139	9.89556	10771	10988
ACAGAGAC	GTCTCTGT	1.64e-05	2.06e-05	1.85e-05	-0.010789	0.0130034	0.000583037	0.000114705	0.000583037	-3.4394	3.8572	5751	5583	0.000164222	0.000120573	0.000142398	-0.14222	0.128814	3.68e-28	4.17e-21	4.17e-21	-11.0038	9.42854	5776	5628	3.45e-05	1.46e-05	2.45e-05	-0.0438723	0.030523	3.57e-07	0.000920343	0.000920343	-5.09078	3.31382	5847	5691
ACAGAGAG	CTCTCTGT	6.57e-05	9.29e-05	7.93e-05	-0.0170425	0.0215079	5.48e-12	2.44e-16	5.48e-12	-6.89268	8.19824	9173	9315	0.000457914	0.000519011	0.000488463	-0.187343	0.207325	2.07e-75	3.19e-85	2.07e-75	-18.3774	19.5656	9213	9402	0.000215769	0.000217351	0.00021656	-0.0861325	0.0915901	3.68e-37	2.02e-37	3.68e-37	-12.7377	12.7843	9309	9475
ACAGAGCA	TGCTCTGT	0.00171462	0.00115528	0.00143495	0.0780954	-0.0675603	8.13e-272	8.8e-184	8.8e-184	35.2407	-28.9189	14245	12839	0.000267417	0.0002426	0.000255008	-0.131132	0.124438	8.68e-45	8.57e-41	8.57e-41	-14.0425	13.3749	13076	13228	1.21e-05	1.41e-05	1.31e-05	-0.019071	0.0204978	0.00253854	0.00115158	0.00253854	-3.01872	3.25062	13138	13257
ACAGAGCC	GGCTCTGT	1.66e-05	3.71e-05	2.69e-05	-0.0119994	0.0177368	0.000525001	2.19e-07	0.000525001	-3.46768	5.18272	5834	5974	0.00126225	0.0010459	0.00115408	-0.426051	0.382173	1.69e-204	8.74e-170	8.74e-170	-30.5239	27.7821	5858	6035	0.00014629	0.000174195	0.000160243	-0.0986471	0.106215	9.86e-26	2.51e-30	9.86e-26	-10.4879	11.4447	5930	6096
ACAGAGCG	CGCTCTGT	0.0024611	0.00240011	0.0024306	0.149474	-0.148502	0	0	0	42.2364	-41.7085	5584	5549	0.000103351	7.43e-05	8.88e-05	-0.123349	0.104523	2.57e-18	1.34e-13	1.34e-13	-8.72916	7.40278	5741	5789	2.23e-05	4.85e-05	3.54e-05	0.0391924	-0.0579116	4.31e-05	1.55e-09	4.31e-05	4.09042	-6.03935	5741	5764
ACAGAGTC	GACTCTGT	0.00174839	0.00182983	0.00178911	-0.0963381	0.0972279	3.93e-277	5.95e-290	3.93e-277	-35.5866	36.4075	9604	9880	1.44e-05	9.21e-06	1.18e-05	0.0350193	-0.0274474	0.00111246	0.00917052	0.00917052	3.26044	-2.60564	9996	10318	9.22e-07	1.51e-06	1.22e-06	-0.00604484	0.00759964	0.405221	0.286184	0.405221	-0.832333	1.06653	10038	10356
ACAGAGTG	CACTCTGT	0.00112271	0.000576998	0.000849855	0.0674729	-0.0445353	1.17e-178	9.33e-93	9.33e-93	28.5079	-20.4315	11826	14001	0.000192941	0.000115688	0.000154314	-0.113198	0.0860138	8.58e-33	2.58e-20	2.58e-20	-11.9274	9.23551	12209	12610	1.98e-05	6.47e-06	1.32e-05	-0.0250831	0.0141585	0.000112165	0.0274721	0.0274721	-3.86267	2.20475	12237	12583
ACAGATCA	NA	3.52e-05	NA	3.52e-05	-0.0200311	NA	4.56e-07	NA	4.56e-07	-5.04399	NA	4421	NA	0.00111985	NA	0.00111985	-0.461634	NA	1.19e-181	NA	1.19e-181	-28.7485	NA	4412	NA	0.000449477	NA	0.000449477	-0.197295	NA	1.75e-75	NA	1.75e-75	-18.3866	NA	4541	NA
ACAGATTC	GAATCTGT	9.82e-05	7.64e-05	8.73e-05	-0.0340872	0.0296355	3.53e-17	1.06e-13	1.06e-13	-8.42771	7.43287	4279	4389	0.000676169	0.000820076	0.000748123	-0.365364	0.400715	1.88e-110	1.51e-133	1.88e-110	-22.334	24.5979	4267	4294	0.000134494	0.000209116	0.000171805	-0.109891	0.136267	8.66e-24	4.56e-36	8.66e-24	-10.0561	12.5397	4397	4430
ACAGCAAA	TTTGCTGT	0.000210486	0.00032453	0.000267508	-0.0354757	0.0437727	5.7e-35	5.65e-53	5.7e-35	-12.338	15.3209	8359	8399	0.00234097	0.00251922	0.00243009	-0.483256	0.499686	0	0	0	-41.591	43.1492	8342	8333	0.000628107	0.00068553	0.000656819	-0.168722	0.175785	9.85e-105	3.93e-114	9.85e-105	-21.7371	22.7097	8608	8580
ACAGCAAC	GTTGCTGT	5.49e-05	8.72e-05	7.11e-05	-0.0259435	0.0325291	2.96e-10	1.98e-15	2.96e-10	-6.30089	7.94284	4102	4004	0.000276855	0.000363363	0.000320109	-0.235684	0.27203	2.63e-46	3.22e-60	2.63e-46	-14.2882	16.3697	4167	4052	8.35e-05	0.000186744	0.000135098	-0.0878817	0.132153	2.36e-15	2.17e-32	2.36e-15	-7.92114	11.8498	4230	4121
ACAGCACA	NA	4.48e-05	NA	4.48e-05	-0.0179403	NA	1.27e-08	NA	1.27e-08	-5.69054	NA	5682	NA	2.5e-05	NA	2.5e-05	-0.0542834	NA	1.74e-05	NA	1.74e-05	-4.29543	NA	5738	NA	6e-05	NA	6e-05	-0.0570513	NA	1.9e-11	NA	1.9e-11	-6.71363	NA	5850	NA
ACAGCAGA	TCTGCTGT	6.53e-05	6.13e-05	6.33e-05	-0.0234286	0.0221835	6.24e-12	2.79e-11	2.79e-11	-6.87408	6.6576	5982	6265	0.000245206	0.000298452	0.000271829	-0.184622	0.19793	3.26e-41	8.81e-50	3.26e-41	-13.4466	14.8352	6021	6384	9.01e-05	0.000138671	0.00011438	-0.075951	0.0918859	1.87e-16	1.78e-24	1.87e-16	-8.23009	10.2111	6119	6448
ACAGCATG	CATGCTGT	0.000207325	0.000222787	0.000215056	-0.0415113	0.0427204	1.8e-34	6.48e-37	1.8e-34	-12.245	12.6935	6081	6146	0.00318408	0.00260027	0.00289217	-0.661805	0.599048	0	0	0	-48.5263	43.8396	6117	6067	0.000436452	0.000480807	0.000458629	-0.166247	0.174119	2.38e-73	1.29e-80	2.38e-73	-18.1181	19.0169	6223	6224
ACAGCCAA	TTGGCTGT	0.000375892	0.000345201	0.000360547	-0.0572888	0.0557953	4.5e-61	3.1e-56	3.1e-56	-16.4893	15.8015	5802	5621	0.0020537	0.00244129	0.00224749	-0.548404	0.605834	0	0	0	-38.95	42.4749	5763	5621	0.00110939	0.00116693	0.00113816	-0.274494	0.285213	1.71e-183	6.56e-193	1.71e-183	-28.8956	29.6364	5821	5679
ACAGCTAA	TTAGCTGT	0.000182401	0.000163562	0.000172981	-0.0486846	0.0454525	1.57e-30	1.51e-27	1.51e-27	-11.4853	10.8759	3908	3986	0.000581273	0.000626563	0.000603918	-0.35414	0.36124	3.22e-95	1.72e-102	3.22e-95	-20.7066	21.4986	3917	4030	0.000241505	0.000313782	0.000277643	-0.154203	0.172444	2.19e-41	3.03e-53	2.19e-41	-13.4761	15.3614	4022	4148
ACAGCTCA	NA	7.53e-05	NA	7.53e-05	-0.026025	NA	1.61e-13	NA	1.61e-13	-7.37781	NA	5470	NA	3.74e-05	NA	3.74e-05	-0.0744838	NA	1.51e-07	NA	1.51e-07	-5.25158	NA	5530	NA	4.96e-07	NA	4.96e-07	-0.00587911	NA	0.541502	NA	0.541502	-0.610543	NA	5512	NA
ACAGGAAA	TTTCCTGT	0.00014261	0.000168171	0.000155391	-0.0284398	0.030415	3.15e-24	2.81e-28	3.15e-24	-10.1553	11.0281	8811	8972	0.000243153	0.000301287	0.00027222	-0.150976	0.168302	6.98e-41	3.09e-50	6.98e-41	-13.3901	14.9055	8877	8849	6.53e-05	8.27e-05	7.4e-05	-0.0529568	0.0596673	2.44e-12	3.1e-15	2.44e-12	-7.0067	7.88711	9074	9058
ACAGGAAC	GTTCCTGT	0.000206482	0.000122642	0.000164562	-0.0528615	0.0401153	2.45e-34	4.63e-21	4.63e-21	-12.2201	9.41747	3762	3804	8.45e-05	0.000123365	0.000103932	-0.136946	0.163035	2.96e-15	1.47e-21	2.96e-15	-7.89286	9.53709	3818	3860	1.33e-05	1.15e-05	1.24e-05	-0.0369519	0.0339727	0.00156114	0.00325164	0.00325164	-3.16308	2.9429	3866	3889
ACAGGCAA	TTGCCTGT	0.000210064	0.000240991	0.000225528	-0.043819	0.0463558	6.65e-35	8.63e-40	6.65e-35	-12.3256	13.202	5539	5646	0.0019147	0.00173659	0.00182565	-0.538545	0.506207	0	1.29e-280	1.29e-280	-37.6062	35.8111	5567	5683	0.000508614	0.000419058	0.000463836	-0.188246	0.1687	3.61e-85	1.68e-70	1.68e-70	-19.5593	17.7532	5674	5789
ACAGGCAC	GTGCCTGT	0.00225416	0.00223454	0.00224435	-0.107039	0.106198	0	0	0	-40.4175	40.2409	9900	9805	5.22e-05	2.93e-05	4.08e-05	-0.0651005	0.048552	5.48e-10	3.29e-06	3.29e-06	-6.20469	4.65159	10311	10264	0.00020651	0.000138723	0.000172616	-0.088449	0.0720638	1.22e-35	1.74e-24	1.74e-24	-12.4613	10.213	10346	10301
ACAGGCAT	ATGCCTGT	0.00401897	0.00410689	0.00406293	-0.102482	0.102844	0	0	0	-54.0157	54.6057	17749	17889	4.22e-06	1.91e-06	3.07e-06	-0.0132907	-0.0088687	0.077609	0.235012	0.235012	-1.76473	-1.18755	18516	18658	0.000290287	0.00023796	0.000264123	-0.0752852	0.0675554	2.16e-49	8.35e-41	8.35e-41	-14.7749	13.3768	18565	18736
ACAGGCGC	GCGCCTGT	0.00310802	0.00286772	0.00298787	-0.17262	0.165554	0	0	0	-47.4794	45.6015	5298	5327	2.05e-06	4.84e-07	1.27e-06	-0.0175734	0.00850977	0.218733	0.550491	0.550491	-1.2299	0.597025	5630	5652	0.000476103	0.000461194	0.000468648	-0.183722	0.179939	7.61e-80	2.11e-77	2.11e-77	-18.9236	18.6248	5586	5632
ACAGGCGT	ACGCCTGT	0.00488784	0.00479512	0.00484148	-0.145038	0.144237	0	0	0	-59.5951	59.0244	11323	11247	2.92e-06	5.16e-06	4.04e-06	0.0141769	-0.018974	0.142652	0.0511094	0.142652	1.46599	-1.95056	11788	11671	0.00106082	0.00101878	0.0010398	-0.185447	0.182643	1.51e-175	1.14e-168	1.14e-168	-28.2553	27.6893	11735	11641
ACAGGGTC	GACCCTGT	0.000965676	0.000954825	0.00096025	-0.0790161	0.0793975	6.09e-154	3.11e-152	3.11e-152	-26.4371	26.288	7631	7473	2.49e-05	1.36e-05	1.92e-05	0.050706	-0.0377349	1.85e-05	0.00156675	0.00156675	4.28234	-3.16204	7944	7849	0.000106191	0.000145409	0.0001258	0.0716188	-0.0844018	4.06e-19	1.38e-25	4.06e-19	8.93545	-10.4563	7962	7873
ACAGGTGC	GCACCTGT	0.00165457	0.00156077	0.00160767	-0.0984631	0.0953158	2.3e-262	1.33e-247	1.33e-247	-34.617	33.62	8646	8691	1.95e-05	1.08e-05	1.52e-05	-0.04275	0.0314816	0.000148363	0.00477931	0.00477931	-3.79381	2.82155	9007	9056	0.000100421	9.12e-05	9.58e-05	-0.066278	0.062499	3.65e-18	1.23e-16	1.23e-16	-8.68929	8.28068	9027	9089
ACAGTAAC	GTTACTGT	0.000141255	0.000207831	0.000174543	-0.0436163	0.0534636	5.17e-24	1.5e-34	5.17e-24	-10.1069	12.2599	3715	3704	0.00356735	0.00337083	0.00346909	-0.899932	0.883053	0	0	0	-51.3737	49.9337	3672	3661	0.000443881	0.000494664	0.000469272	-0.212801	0.226182	1.44e-74	6.95e-83	1.44e-74	-18.2717	19.2891	3832	3838
ACAGTCAA	NA	6.55e-05	NA	6.55e-05	-0.0302911	NA	5.96e-12	NA	5.96e-12	-6.88071	NA	3604	NA	0.000161643	NA	0.000161643	-0.192517	NA	9.6e-28	NA	9.6e-28	-10.9171	NA	3676	NA	0.000160406	NA	0.000160406	-0.129565	NA	4.67e-28	NA	4.67e-28	-10.9823	NA	3771	NA
ACAGTCCA	TGGACTGT	0.000112301	9.85e-05	0.000105416	-0.0429632	0.0408677	2.04e-19	3.15e-17	3.15e-17	-9.01162	8.44103	3050	2959	0.000126927	0.000161861	0.000144394	-0.184873	0.212542	3.91e-22	8.85e-28	3.91e-22	-9.6738	10.9244	3099	2994	0.000236584	0.000232123	0.000234353	-0.172011	0.172987	1.4e-40	7.59e-40	7.59e-40	-13.3381	13.2117	3126	3037
ACAGTCTC	GAGACTGT	0.000110526	9.89e-05	0.000104717	-0.035959	0.0336897	3.9e-19	2.74e-17	2.74e-17	-8.94014	8.45718	4345	4410	7.86e-05	0.000132815	0.000105709	-0.122565	0.157936	2.69e-14	4.36e-23	2.69e-14	-7.61252	9.89566	4428	4471	0.000134742	0.00014539	0.000140066	-0.109278	0.1125	7.89e-24	1.39e-25	7.89e-24	-10.0654	10.4556	4476	4519
ACAGTGAG	CTCACTGT	0.000161962	0.000209181	0.000185572	0.032415	-0.0364271	2.7e-27	9.17e-35	2.7e-27	10.8226	-12.2997	7708	7790	1.19e-05	1.64e-05	1.41e-05	-0.0353615	0.0395664	0.00309186	0.000508761	0.00309186	-2.95846	3.47612	7906	8023	8.25e-06	2.27e-06	5.26e-06	-0.0200927	0.0101021	0.0127831	0.191399	0.191399	-2.48976	1.30645	7964	8061
ACAGTGGC	GCCACTGT	0.000104559	0.000166455	0.000135507	0.024915	-0.031216	3.46e-18	5.26e-28	3.46e-18	8.69544	-10.9717	8533	8576	2.9e-07	1.28e-06	7.82e-07	0.00522266	0.0109401	0.644035	0.332239	0.644035	0.462065	0.969614	8919	8916	3.93e-05	3.43e-05	3.68e-05	0.0415563	-0.0387576	5.46e-08	3.8e-07	3.8e-07	5.43555	-5.07895	8953	8952
ACAGTGGG	CCCACTGT	1.5e-06	3.38e-07	9.2e-07	-0.00378328	-0.00181392	0.297367	0.621267	0.621267	-1.0421	-0.494055	5087	5044	0.00055843	0.000530633	0.000544531	0.298841	-0.293401	1.5e-91	4.34e-87	4.34e-87	20.2954	-19.7836	5061	5047	0.00029014	0.000279049	0.000284595	0.146135	-0.144607	2.28e-49	1.51e-47	1.51e-47	14.7712	-14.4861	5147	5118
ACAGTTCC	NA	7.17e-05	NA	7.17e-05	-0.0310191	NA	6.01e-13	NA	6.01e-13	-7.20044	NA	3770	NA	6.25e-05	NA	6.25e-05	-0.118507	NA	1.12e-11	NA	1.12e-11	-6.79034	NA	3752	NA	8.45e-05	NA	8.45e-05	-0.0940085	NA	1.6e-15	NA	1.6e-15	-7.96918	NA	3772	NA
ACATAAAA	TTTTATGT	0.000122829	0.000217217	0.000170023	-0.0227695	0.0306983	4.33e-21	4.92e-36	4.33e-21	-9.42465	12.5338	11512	11255	0.000535565	0.000482112	0.000508839	-0.195118	0.182599	7.02e-88	2.69e-79	2.69e-79	-19.8753	18.8569	11427	11724	0.000450345	0.000444402	0.000447373	-0.119606	0.117191	1.26e-75	1.19e-74	1.19e-74	-18.4043	18.2824	11968	12270
ACATAAAC	GTTTATGT	0.000231427	0.000227278	0.000229353	-0.0498097	0.0482898	2.8e-38	1.27e-37	1.27e-37	-12.9373	12.8208	4702	4857	0.00077354	0.000760298	0.000766919	-0.363831	0.351889	4.43e-126	5.91e-124	5.91e-124	-23.8892	23.6837	4908	5015	0.000577712	0.000683336	0.000630524	-0.211516	0.226201	1.75e-96	8.98e-114	1.75e-96	-20.8464	22.6733	5081	5198
ACATAAAG	CTTTATGT	0.000163052	0.000121789	0.00014242	-0.0394439	0.0337689	1.82e-27	6.33e-21	6.33e-21	-10.8589	9.38464	5248	5391	0.000240843	0.000165085	0.000202964	-0.194225	0.159224	1.64e-40	2.67e-28	2.67e-28	-13.3264	11.0327	5333	5464	0.000118033	0.000115401	0.000116717	-0.0915607	0.089458	4.5e-21	1.22e-20	1.22e-20	-9.42054	9.31492	5520	5676
ACATAACA	TGTTATGT	0.000172969	8.17e-05	0.000127332	-0.0396112	0.0278754	4.89e-29	1.52e-14	1.52e-14	-11.1843	7.68605	4710	4666	0.000989266	0.00103132	0.00101029	-0.392825	0.405322	1.07e-160	1.91e-167	1.07e-160	-27.0187	27.5875	4664	4687	0.000611265	0.000800922	0.000706094	-0.207234	0.239342	5.63e-102	5.11e-133	5.63e-102	-21.4435	24.5481	4863	4885
ACATAATA	TATTATGT	7.9e-05	0.000102628	9.08e-05	-0.0262964	0.0299755	4.16e-14	7.02e-18	4.16e-14	-7.55589	8.61475	5563	5553	0.000183342	0.000184745	0.000184044	-0.15681	0.157426	3.03e-31	1.8e-31	3.03e-31	-11.6269	11.6713	6021	5982	0.000156783	0.000151075	0.000153929	-0.0969047	0.0948957	1.84e-27	1.61e-26	1.61e-26	-10.8576	10.6581	6317	6309
ACATAATC	GATTATGT	5.5e-05	5.93e-05	5.71e-05	-0.0290609	0.0300435	2.91e-10	5.84e-11	2.91e-10	-6.3038	6.54792	3286	3321	0.000172294	0.000185763	0.000179028	-0.206722	0.212483	1.83e-29	1.23e-31	1.83e-29	-11.2711	11.7034	3393	3467	0.000206342	0.000210442	0.000208392	-0.152379	0.152548	1.3e-35	2.76e-36	1.3e-35	-12.4563	12.5794	3502	3568
ACATACAA	TTGTATGT	8.6e-05	0.000150762	0.000118358	-0.0268549	0.0354691	3.18e-15	1.61e-25	3.18e-15	-7.88392	10.4416	5904	5954	0.000545655	0.00056638	0.000556017	-0.272686	0.27759	1.68e-89	7.91e-93	1.68e-89	-20.0618	20.4394	6078	6056	0.000360685	0.000375062	0.000367873	-0.147913	0.150941	6.19e-61	2.72e-63	6.19e-61	-16.4699	16.7951	6391	6354
ACATACAC	GTGTATGT	0.000102432	6.96e-05	8.6e-05	-0.0243048	0.01999	7.55e-18	1.29e-12	1.29e-12	-8.60653	7.09569	6063	6110	0.00116927	0.00122426	0.00119677	-0.341954	0.340779	1.4e-189	2.1e-198	1.4e-189	-29.3768	30.0604	6288	6358	0.000662101	0.000782361	0.000722231	-0.168547	0.182633	2.68e-110	5.57e-130	2.68e-110	-22.318	24.2618	6525	6582
ACATACCA	TGGTATGT	0.000153786	0.000169196	0.000161491	-0.0445901	0.0476233	5.33e-26	1.94e-28	5.33e-26	-10.5458	11.0616	3787	3718	0.000987208	0.00103396	0.00101058	-0.471165	0.485323	2.29e-160	7.2e-168	2.29e-160	-26.9905	27.6229	3677	3641	0.000814853	0.000808438	0.000811645	-0.286719	0.287839	2.68e-135	3.01e-134	3.01e-134	-24.7609	24.6631	3837	3793
ACATAGAC	GTCTATGT	0.000151172	0.000130346	0.000140759	-0.050236	0.0476954	1.38e-25	2.77e-22	2.77e-22	-10.4558	9.7088	2768	2763	0.000653877	0.000638083	0.00064598	-0.423709	0.433922	7.11e-107	2.44e-104	2.44e-104	-21.9625	21.6955	2807	2739	0.000364075	0.000320653	0.000342364	-0.212008	0.205248	1.72e-61	2.26e-54	2.26e-54	-16.5472	15.5287	2922	2879
ACATAGGC	GCCTATGT	0.000146446	0.000144538	0.000145492	-0.0489774	0.0489617	7.77e-25	1.56e-24	1.56e-24	-10.291	10.2237	3088	3048	0.0047201	0.00473019	0.00472515	-1.15041	1.15562	0	0	0	-59.1283	59.1918	3006	2984	0.00106096	0.0011206	0.00109078	-0.368075	0.377857	1.44e-175	2.5e-185	1.44e-175	-28.2572	29.0415	3093	3096
ACATAGGT	ACCTATGT	4.46e-05	4.83e-05	4.65e-05	0.0276497	-0.0290289	1.35e-08	3.42e-09	1.35e-08	5.67951	-5.9101	2947	2871	4.92e-06	6.82e-06	5.87e-06	0.0369046	-0.0435068	0.0569021	0.0249898	0.0569021	1.90407	-2.24157	3033	2972	2.2e-06	3.66e-06	2.93e-06	0.0166898	-0.0215381	0.198338	0.0973779	0.198338	1.2863	-1.6577	3110	3049
ACATAGTG	CACTATGT	0.000252902	0.000218967	0.000235934	0.047828	-0.0443128	1.14e-41	2.6e-36	2.6e-36	13.5244	-12.5842	5608	5615	6.2e-05	5.55e-05	5.88e-05	-0.0950341	0.0893799	1.36e-11	1.56e-10	1.56e-10	-6.76239	6.39927	5800	5834	5.21e-05	4.73e-05	4.97e-05	-0.0593299	0.0561017	3.81e-10	2.52e-09	2.52e-09	-6.26161	5.96049	5861	5902
ACATATAC	GTATATGT	0.000193797	0.000160103	0.00017695	-0.0384676	0.0346508	2.48e-32	5.33e-27	5.33e-27	-11.8387	10.7602	5655	5746	0.000268857	0.00026179	0.000265323	-0.174255	0.171838	5.09e-45	6.98e-44	6.98e-44	-14.0803	13.894	6112	6184	0.000153388	0.000200372	0.00017688	-0.0875768	0.100562	6.68e-27	1.25e-34	6.68e-27	-10.7394	12.2747	6365	6430
ACATATCA	TGATATGT	6.1e-05	5.93e-05	6.02e-05	-0.0296187	0.0286787	3.11e-11	5.76e-11	5.76e-11	-6.64144	6.55002	3516	3600	0.000201719	0.000128928	0.000165324	-0.215464	0.169392	3.3e-34	1.85e-22	1.85e-22	-12.1958	9.74977	3656	3742	0.00018031	0.0001788	0.000179555	-0.136765	0.133129	2.48e-31	4.39e-31	4.39e-31	-11.6439	11.595	3802	3909
ACATCAAA	TTTGATGT	0.000165646	0.000221482	0.000193564	-0.0368858	0.0423818	7.06e-28	1.04e-36	7.06e-28	-10.945	12.6562	6116	6212	0.00159198	0.0017259	0.00165894	-0.464814	0.484165	2.08e-257	6.72e-279	2.08e-257	-34.2852	35.7006	6172	6179	0.00117889	0.001271	0.00122494	-0.268394	0.278014	7.26e-195	6.16e-210	7.26e-195	-29.788	30.9312	6413	6457
ACATCAAC	GTTGATGT	3.14e-05	2.96e-05	3.05e-05	-0.02428	0.0234037	1.92e-06	3.72e-06	3.72e-06	-4.76136	4.62635	2657	2683	0.000232926	0.000325497	0.000279211	-0.268466	0.315424	3.1e-39	3.94e-54	3.1e-39	-13.1054	15.493	2693	2706	0.00010599	0.000184424	0.000145207	-0.121803	0.160388	4.39e-19	5.22e-32	4.39e-19	-8.92697	11.776	2788	2777
ACATCACA	TGTGATGT	0.000348315	0.000727138	0.000537726	-0.0505551	0.0666097	1e-56	2.14e-116	1e-56	-15.8726	22.9379	6486	8109	0.00189548	0.00212526	0.00201037	-0.503135	0.529333	4.08e-306	0	4.08e-306	-37.4166	39.6242	6263	6264	0.00125409	0.00139245	0.00132327	-0.27599	0.289495	3.6e-207	8.24e-230	3.6e-207	-30.7245	32.3774	6450	6434
ACATCACC	GGTGATGT	5.56e-06	9.38e-07	3.25e-06	0.00924147	0.00382389	0.0450064	0.41018	0.41018	2.0046	0.823578	3144	3144	0.00026551	0.000255119	0.000260315	-0.257832	0.260284	1.76e-44	8.27e-43	8.27e-43	-13.9923	13.7157	3150	3067	6.57e-05	7.75e-05	7.16e-05	-0.0873252	0.0975874	2.09e-12	2.26e-14	2.09e-12	-7.02872	7.63527	3186	3108
ACATCAGA	TCTGATGT	1.15e-05	1.48e-05	1.32e-05	-0.0116249	0.0129819	0.00399456	0.0010515	0.00399456	-2.8786	3.27638	4301	4275	0.000218973	0.000144196	0.000181585	-0.206224	0.164102	5.47e-37	6.31e-25	6.31e-25	-12.7068	10.311	4344	4328	0.000106381	4.98e-05	7.81e-05	-0.0973652	0.0652216	3.78e-19	9.34e-10	9.34e-10	-8.94344	6.12044	4433	4438
ACATCATA	TATGATGT	0.000137906	0.000105008	0.000121457	-0.0409878	0.0353034	1.75e-23	2.94e-18	2.94e-18	-9.9864	8.7141	4078	4190	0.000867432	0.000845118	0.000856275	-0.413275	0.407831	3.79e-141	1.44e-137	1.44e-137	-25.2987	24.9709	4116	4212	0.000444473	0.000412308	0.000428391	-0.197869	0.190764	1.15e-74	2.15e-69	2.15e-69	-18.2839	17.6096	4315	4403
ACATCCAA	NA	6.24e-05	NA	6.24e-05	-0.029352	NA	1.82e-11	NA	1.82e-11	-6.71975	NA	3659	NA	0.000261502	NA	0.000261502	-0.243791	NA	7.77e-44	NA	7.77e-44	-13.8863	NA	3694	NA	0.000218421	NA	0.000218421	-0.150953	NA	1.35e-37	NA	1.35e-37	-12.8158	NA	3768	NA
ACATCCAC	NA	1.59e-05	NA	1.59e-05	-0.0160887	NA	0.000699252	NA	0.000699252	-3.38989	NA	2979	NA	0.000274933	NA	0.000274933	-0.272672	NA	5.36e-46	NA	5.36e-46	-14.2385	NA	3025	NA	0.000124579	NA	0.000124579	-0.123866	NA	3.74e-22	NA	3.74e-22	-9.67829	NA	3070	NA
ACATCCCA	TGGGATGT	6.26e-05	5.77e-05	6.02e-05	-0.0288367	0.0270521	1.7e-11	1.05e-10	1.05e-10	-6.72997	6.45913	3720	3843	0.000216577	0.000159146	0.000187861	-0.216555	0.181906	1.33e-36	2.43e-27	2.43e-27	-12.637	10.8324	3799	3907	0.000162177	0.000174375	0.000168276	-0.12756	0.129484	2.39e-28	2.35e-30	2.39e-28	-11.0428	11.4506	3842	3952
ACATCTAC	GTAGATGT	6.25e-05	5.62e-05	5.93e-05	-0.0311363	0.0297199	1.8e-11	1.87e-10	1.87e-10	-6.7217	6.37214	3248	3228	0.00335213	0.00384833	0.00360023	-0.946381	1.02025	0	0	0	-49.7946	53.3662	3139	3125	0.00107924	0.00129479	0.00118701	-0.358409	0.395047	1.46e-178	7.89e-214	1.46e-178	-28.4999	31.2198	3298	3284
ACATGAAA	TTTCATGT	0.000107995	0.000209653	0.000158824	-0.0251094	0.0334819	9.84e-19	7.72e-35	9.84e-19	-8.83717	12.3136	8613	9347	0.000900399	0.000876941	0.00088867	-0.293635	0.28611	1.94e-146	1.13e-142	1.13e-142	-25.7754	25.4371	8725	8886	0.000323097	0.000329461	0.000326279	-0.118057	0.117857	8.98e-55	8.13e-56	8.98e-55	-15.5878	15.7406	9067	9215
ACATGCAA	TTGCATGT	0.00013915	0.000103483	0.000121316	-0.03878	0.0337221	1.11e-23	5.13e-18	5.13e-18	-10.0313	8.65056	4657	4574	0.000256787	0.000223478	0.000240132	-0.213939	0.20018	4.46e-43	1.03e-37	1.03e-37	-13.7605	12.8368	4707	4660	0.000155959	0.000127064	0.000141511	-0.11216	0.101746	2.52e-27	1.46e-22	1.46e-22	-10.829	9.77434	4876	4808
ACATGCAC	GTGCATGT	4.28e-05	6.05e-05	5.16e-05	-0.0176824	0.0212428	2.64e-08	3.76e-11	2.64e-08	-5.56404	6.61329	5106	5054	0.000228594	0.0002794	0.000253997	-0.163574	0.191613	1.54e-38	1.02e-46	1.54e-38	-12.983	14.3538	5259	5147	0.000126987	0.000148406	0.000137697	-0.0828082	0.0917749	1.5e-22	4.42e-26	1.5e-22	-9.77138	10.5635	5348	5255
ACATGCCA	TGGCATGT	0.000133604	0.000186458	0.000160031	-0.0363858	0.0432597	8.44e-23	3.59e-31	8.44e-23	-9.82938	11.6123	4926	5040	0.000215427	0.000235564	0.000225495	-0.186335	0.195919	2.04e-36	1.16e-39	2.04e-36	-12.6034	13.1795	5051	5173	9.42e-05	0.000136647	0.000115409	-0.0831637	0.101291	3.95e-17	3.83e-24	3.95e-17	-8.41445	10.1363	5136	5257
ACATGCCT	AGGCATGT	0.000491888	0.000437775	0.000464832	0.0630272	-0.0597441	2.37e-79	7.94e-71	7.94e-71	18.8637	-17.7954	6250	6196	1.87e-05	2.22e-05	2.04e-05	-0.0500057	0.0545397	0.000206074	5.26e-05	0.000206074	-3.71147	4.04376	6291	6302	4.26e-06	2.66e-06	3.46e-06	0.0162329	-0.01271	0.0734004	0.157433	0.157433	1.79034	-1.41376	6373	6383
ACATGGAA	TTCCATGT	0.000112392	7.3e-05	9.27e-05	-0.027158	0.0220363	1.97e-19	3.69e-13	3.69e-13	-9.01528	7.26665	7596	7545	0.00166187	0.0016497	0.00165578	-0.438746	0.435007	1.27e-268	1.14e-266	1.14e-266	-35.0309	34.9023	7159	7280	0.000789289	0.000608348	0.000698818	-0.202781	0.177329	4.1e-131	1.69e-101	1.69e-101	-24.369	21.3923	7459	7568
ACATGGAC	GTCCATGT	0.000135013	0.000206336	0.000170674	-0.0418785	0.0517968	5.05e-23	2.58e-34	5.05e-23	-9.88108	12.2158	3862	3843	0.000117439	0.000114489	0.000115964	-0.157696	0.156047	1.34e-20	4.03e-20	4.03e-20	-9.30516	9.18755	3945	3909	1.94e-05	1.22e-05	1.58e-05	-0.0436442	0.0346827	0.00013501	0.00245993	0.00245993	-3.81716	3.02824	3982	3950
ACATGGAG	CTCCATGT	0.00016142	0.000344258	0.000252839	0.0356764	-0.0527327	3.3e-27	4.37e-56	3.3e-27	10.8044	-15.7799	6200	6255	7.21e-06	1.71e-05	1.21e-05	-0.0304583	0.0472509	0.0211659	0.00039185	0.0211659	-2.30502	3.54553	6360	6428	0.000130022	0.000138844	0.000134433	0.0882273	-0.0919303	4.73e-23	1.66e-24	4.73e-23	9.88747	-10.2175	6410	6462
ACATGGAT	ATCCATGT	0.000161436	0.000185845	0.00017364	-0.0366877	0.0395423	3.28e-27	4.49e-31	3.28e-27	-10.805	11.5932	6020	5978	0.00010129	0.00010943	0.00010536	-0.11843	0.122646	5.55e-18	2.66e-19	5.55e-18	-8.64166	8.98222	6034	6085	5.43e-06	1.08e-05	8.13e-06	-0.0186057	0.0261936	0.0432815	0.00431557	0.0432815	-2.02099	2.85413	6145	6187
ACATGGCG	CGCCATGT	0.000289448	0.000269328	0.000279388	0.0842653	-0.0830697	1.93e-47	2.9e-44	2.9e-44	14.4689	-13.9568	2072	1986	7.27e-06	1.08e-05	9.03e-06	-0.0539903	0.0670851	0.0206333	0.00480006	0.0206333	-2.31463	2.82016	2108	2032	2.2e-06	7.34e-06	4.77e-06	0.0202454	-0.0378743	0.198205	0.0188078	0.198205	1.28668	-2.34932	2128	2032
ACATGGTG	CACCATGT	0.00391373	0.00374206	0.00382789	0.10919	-0.106626	0	0	0	53.3009	-52.1143	16274	16368	3.6e-06	2.09e-06	2.84e-06	-0.0132661	0.0100489	0.103434	0.214462	0.214462	-1.62843	1.24139	16899	17024	0.000440899	0.000379565	0.000410232	0.100437	-0.0923307	4.44e-74	4.98e-64	4.98e-64	18.2102	-16.8956	16921	17067
ACATGTAC	GTACATGT	0.000198507	0.000246585	0.000222546	-0.0465237	0.0518041	4.46e-33	1.13e-40	4.46e-33	-11.9817	13.3544	4423	4445	0.00015813	0.000135896	0.000147013	-0.163594	0.151008	3.54e-27	1.39e-23	1.39e-23	-10.7978	10.0098	4773	4820	0.000145193	0.000184794	0.000164994	-0.105855	0.118855	1.49e-25	4.54e-32	1.49e-25	-10.4485	11.7878	4897	4947
ACATGTAT	ATACATGT	0.000129649	0.000151464	0.000140557	-0.0294184	0.0319867	3.58e-22	1.24e-25	3.58e-22	-9.6828	10.4659	7016	6984	2.69e-05	3.9e-05	3.29e-05	-0.0522719	0.0626406	8.51e-06	8.3e-08	8.51e-06	-4.4519	5.36046	7596	7635	1.82e-05	4.65e-05	3.24e-05	-0.0286863	0.045609	0.000213686	3.34e-09	0.000213686	-3.70228	5.91397	7868	7911
ACATGTGC	GCACATGT	0.00042479	0.000504594	0.000464692	0.0528529	-0.0571414	8.83e-69	2.36e-81	8.83e-69	17.5294	-19.1059	5701	5723	0.000154641	0.000174503	0.000164572	0.123994	-0.131224	1.3e-26	8.07e-30	1.3e-26	10.678	-11.3431	6028	6069	0.000192015	0.000181765	0.00018689	0.0940227	-0.0909288	2.95e-33	1.43e-31	1.43e-31	12.016	-11.6908	6106	6160
ACATTAAA	TTTAATGT	8.7e-05	0.000152915	0.000119944	-0.0232293	0.0305922	2.19e-15	7.33e-26	2.19e-15	-7.93043	10.5159	7984	8008	0.000266994	0.000289938	0.000278466	-0.160635	0.166307	1.02e-44	2.06e-48	1.02e-44	-14.0314	14.622	8498	8530	0.000328736	0.000336545	0.000332641	-0.118649	0.119193	1.07e-55	5.6e-57	1.07e-55	-15.7233	15.909	8953	8993
ACATTACA	NA	7.29e-05	NA	7.29e-05	-0.0302254	NA	3.82e-13	NA	3.82e-13	-7.26176	NA	3935	NA	0.000153434	NA	0.000153434	-0.175548	NA	2.03e-26	NA	2.03e-26	-10.6362	NA	4114	NA	0.000141774	NA	0.000141774	-0.112991	NA	5.47e-25	NA	5.47e-25	-10.3247	NA	4286	NA
ACATTAGA	TCTAATGT	3.52e-05	1.59e-05	2.56e-05	-0.0217913	0.0145301	4.46e-07	0.000706097	0.000706097	-5.04842	3.38722	3756	3797	0.000530964	0.000509932	0.000520448	-0.342047	0.334727	3.84e-87	9.17e-84	9.17e-84	-19.7897	19.3936	3826	3818	0.000269715	0.000274019	0.000271867	-0.162739	0.163871	5.12e-46	1.01e-46	5.12e-46	-14.2416	14.3549	4019	4014
ACATTCAA	TTGAATGT	3.9e-05	8.86e-05	6.38e-05	-0.0172953	0.0263813	1.08e-07	1.19e-15	1.08e-07	-5.31292	8.00532	6419	6212	0.00123314	0.00130341	0.00126827	-0.412832	0.415931	7.92e-200	4.2e-211	7.92e-200	-30.1694	31.0182	5975	6197	0.0006361	0.000635669	0.000635885	-0.198168	0.194122	4.84e-106	5.7e-106	5.7e-106	-21.8751	21.8677	6251	6450
ACATTCCA	TGGAATGT	0.000241326	9.48e-05	0.000168076	-0.0464084	0.0291279	7.64e-40	1.23e-16	1.23e-16	-13.2112	8.2808	5573	5610	0.00157556	0.0015977	0.00158663	-0.481808	0.487081	8.98e-255	2.51e-258	8.98e-255	-34.1077	34.3469	5639	5636	0.000411961	0.000469001	0.000440481	-0.16621	0.178542	2.45e-69	1.11e-78	2.45e-69	-17.6022	18.7818	5797	5768
ACATTTCA	TGAAATGT	9.45e-05	6.29e-05	7.87e-05	-0.0236058	0.0193544	1.39e-16	1.56e-11	1.56e-11	-8.26618	6.74276	8449	8375	0.00016997	0.000234486	0.000202228	-0.127284	0.150497	4.35e-29	1.74e-39	4.35e-29	-11.1948	13.1493	8702	8611	0.000196006	0.000221117	0.000208561	-0.0922646	0.098419	6.51e-34	4.87e-38	6.51e-34	-12.1402	12.8946	8950	8896
ACCAAAAA	TTTTTGGT	6.27e-05	0.000105953	8.43e-05	-0.0162958	0.0209079	1.63e-11	2.08e-18	1.63e-11	-6.73554	8.7532	11626	11774	0.00535712	0.00500094	0.00517903	-0.608859	0.582496	0	0	0	-63.0122	60.8705	11845	11961	0.00146815	0.001459	0.00146357	-0.21412	0.211448	3.38e-242	1.06e-240	1.06e-240	-33.2471	33.1431	12296	12407
ACCAAAAC	GTTTTGGT	0.000428309	0.00043427	0.000431289	-0.0535573	0.0538071	2.46e-69	2.83e-70	2.46e-69	-17.6019	17.724	5972	6000	0.0118166	0.0106146	0.0112156	-1.17629	1.11517	0	0	0	-93.89	88.9326	5838	5857	0.00248816	0.00233872	0.00241344	-0.357747	0.345616	0	0	0	-43.3041	41.9804	6140	6145
ACCAAAAG	CTTTTGGT	0.000164628	0.000155958	0.000160293	-0.0376757	0.0364169	1.02e-27	2.42e-26	2.42e-26	-10.9113	10.62	5861	5942	0.00297407	0.00291597	0.00294502	-0.656824	0.658843	0	0	0	-46.8937	46.4321	5800	5654	0.000838636	0.000760208	0.000799422	-0.234672	0.22601	3.44e-139	2.35e-126	2.35e-126	-25.1199	23.9155	6006	5857
ACCAAAAT	ATTTTGGT	8.3e-05	8.22e-05	8.26e-05	-0.0238551	0.0239653	9.51e-15	1.25e-14	1.25e-14	-7.74575	7.71075	7166	7180	0.00059585	0.000618602	0.000607226	-0.257378	0.262812	1.47e-97	3.27e-101	1.47e-97	-20.9648	21.3615	7431	7494	0.000391179	0.000313355	0.000352267	-0.139293	0.125734	6.22e-66	3.56e-53	3.56e-53	-17.1523	15.351	7741	7737
ACCAAACA	TGTTTGGT	0.000374395	0.000424243	0.000399319	-0.05653	0.0592299	7.74e-61	1.08e-68	7.74e-61	-16.4564	17.5181	5907	6042	0.000784366	0.000882064	0.000833215	-0.331517	0.346297	8.11e-128	1.7e-143	8.11e-128	-24.0559	25.5114	5998	6118	0.000450119	0.000526467	0.000488293	-0.170057	0.180621	1.37e-75	4.3e-88	1.37e-75	-18.3997	19.8998	6127	6278
ACCAAACC	GGTTTGGT	3.03e-05	4.35e-05	3.69e-05	-0.021095	0.0224084	2.87e-06	2.01e-08	2.87e-06	-4.68015	5.61117	3082	3200	0.000489213	0.0004552	0.000472206	-0.345721	0.295187	1.95e-80	5.66e-75	5.66e-75	-18.9954	18.3228	3095	3213	0.000223488	0.000234918	0.000229203	-0.158571	0.143647	1.99e-38	2.64e-40	1.99e-38	-12.9636	13.291	3150	3300
ACCAAAGA	TCTTTGGT	7.67e-05	7.46e-05	7.56e-05	-0.0277121	0.0266498	9.46e-14	2.09e-13	2.09e-13	-7.44845	7.3429	5061	5291	0.000536172	0.000579507	0.00055784	-0.295917	0.302663	5.6e-88	6.18e-95	5.6e-88	-19.8866	20.6751	5165	5313	0.000256374	0.000267197	0.000261785	-0.138192	0.13863	7.92e-44	1.33e-45	7.92e-44	-13.8849	14.175	5310	5470
ACCAAAGC	GCTTTGGT	4.75e-05	3e-05	3.87e-05	-0.0256257	0.0204674	4.69e-09	3.17e-06	3.17e-06	-5.85794	4.65983	3655	3631	0.000916096	0.000980232	0.000948164	-0.456304	0.476118	5.89e-149	3.01e-159	5.89e-149	-25.9993	26.8949	3707	3639	0.00033291	0.000341868	0.000337389	-0.187045	0.19082	2.21e-56	7.52e-58	2.21e-56	-15.8229	16.0344	3759	3702
ACCAAATA	TATTTGGT	0.000144282	0.000166258	0.00015527	-0.0361611	0.0399044	1.71e-24	5.65e-28	1.71e-24	-10.2147	10.9652	5531	5256	0.000295454	0.000300391	0.000297923	-0.20766	0.214798	2.68e-49	4.3e-50	2.68e-49	-14.7605	14.8834	5714	5450	0.000230708	0.00022768	0.000229194	-0.123561	0.125565	1.3e-39	4.07e-39	4.07e-39	-13.1714	13.0846	5900	5656
ACCAAATC	GATTTGGT	6.07e-05	4.49e-05	5.28e-05	-0.0295367	0.0251843	3.46e-11	1.21e-08	1.21e-08	-6.62581	5.69814	3520	3566	0.000630823	0.000676455	0.000653639	-0.384493	0.398098	3.57e-103	1.69e-110	3.57e-103	-21.5716	22.3387	3590	3584	0.000180425	0.000229681	0.000205053	-0.139385	0.157178	2.37e-31	1.91e-39	2.37e-31	-11.6476	13.142	3667	3661
ACCAAATG	CATTTGGT	3.64e-05	2.9e-05	3.27e-05	-0.0205068	0.0180399	2.93e-07	4.74e-06	4.74e-06	-5.12824	4.57596	4376	4499	0.000192144	0.000220881	0.000206513	-0.19032	0.201684	1.15e-32	2.7e-37	1.15e-32	-11.9028	12.762	4472	4571	8.11e-05	0.000119417	0.000100258	-0.083654	0.100148	5.79e-15	2.66e-21	5.79e-15	-7.80861	9.47564	4578	4694
ACCAAATT	NA	1.54e-05	NA	1.54e-05	-0.0130253	NA	0.000836677	NA	0.000836677	-3.34038	NA	4596	NA	0.000146878	NA	0.000146878	-0.16209	NA	2.33e-25	NA	2.33e-25	-10.4064	NA	4710	NA	9.29e-05	NA	9.29e-05	-0.0864868	NA	6.33e-17	NA	6.33e-17	-8.35907	NA	4904	NA
ACCAACAA	TTGTTGGT	0.000143856	0.000123351	0.000133603	-0.0407723	0.0373639	2e-24	3.58e-21	3.58e-21	-10.1996	9.44466	4312	4405	0.00322949	0.00344888	0.00333918	-0.79273	0.810099	0	0	0	-48.8722	50.5105	4272	4371	0.00123437	0.00123909	0.00123673	-0.329606	0.326303	6.06e-204	1.03e-204	6.06e-204	-30.4818	30.54	4423	4533
ACCAACAC	GTGTTGGT	5.13e-07	1.98e-07	3.56e-07	-0.00289081	0.00183068	0.542359	0.704925	0.704925	-0.609249	0.37868	2898	2916	0.000298042	0.00027283	0.000285436	-0.289965	0.274686	1.03e-49	1.17e-45	1.17e-45	-14.825	14.184	2927	2993	0.000241203	0.000101078	0.000171141	-0.172017	0.113062	2.45e-41	2.85e-18	2.85e-18	-13.4677	8.71767	2983	3042
ACCAACAT	ATGTTGGT	0.000559973	0.000616047	0.00058801	0.0630552	-0.0656496	4.47e-90	6.62e-99	4.47e-90	20.1276	-21.112	7117	7273	0.000170585	0.000252623	0.000211604	-0.139524	0.168376	3.46e-29	2.09e-42	3.46e-29	-11.215	13.6485	7388	7554	1.65e-05	1.16e-05	1.4e-05	0.0294606	-0.0245596	0.000435994	0.00313486	0.00313486	3.5173	-2.9542	7480	7643
ACCAACCA	TGGTTGGT	1.69e-06	1.75e-05	9.62e-06	-0.00443147	0.0145372	0.26847	0.000368687	0.26847	-1.10659	3.56156	3454	3453	0.00119386	0.00147016	0.00133201	-0.480825	0.53988	1.59e-193	7.36e-238	1.59e-193	-29.6844	32.9454	3463	3469	0.000401786	0.00059484	0.000498313	-0.189812	0.23376	1.14e-67	2.75e-99	1.14e-67	-17.3834	21.1533	3511	3513
ACCAAGAA	TTCTTGGT	5.65e-05	4.04e-05	4.85e-05	-0.0221228	0.01848	1.62e-10	6.51e-08	6.51e-08	-6.39344	5.40436	5819	5972	0.00073992	0.000637519	0.00068872	-0.328134	0.304459	1.1e-120	3.01e-104	3.01e-104	-23.3639	21.6859	5761	5781	0.0001431	0.000190246	0.000166673	-0.0974517	0.112273	3.31e-25	5.76e-33	3.31e-25	-10.3729	11.9605	5921	5943
ACCAAGAC	NA	7.78e-06	NA	7.78e-06	-0.0117937	NA	0.0176751	NA	0.0176751	-2.37236	NA	2823	NA	0.000160394	NA	0.000160394	-0.217091	NA	1.53e-27	NA	1.53e-27	-10.8748	NA	2845	NA	2.52e-05	NA	2.52e-05	-0.0584258	NA	1.33e-05	NA	1.33e-05	-4.35586	NA	2896	NA
ACCAAGAT	ATCTTGGT	1.31e-06	2.2e-09	6.57e-07	-0.00408601	-0.000172359	0.329994	0.968161	0.968161	-0.974126	-0.0399145	3865	3743	0.000265006	0.000202059	0.000233532	-0.236176	0.212397	2.12e-44	2.91e-34	2.91e-34	-13.9791	12.206	3919	3765	5.74e-05	3.4e-05	4.57e-05	-0.0743589	0.0590257	5.05e-11	4.36e-07	4.36e-07	-6.56959	5.05277	4012	3839
ACCAAGCA	TGCTTGGT	0.000210042	0.000147073	0.000178558	-0.0524807	0.0433291	6.7e-35	6.18e-25	6.18e-25	-12.325	10.313	3851	3937	0.00177789	0.0020387	0.00190829	-0.623661	0.659633	3.05e-287	0	3.05e-287	-36.2352	38.8071	3844	3898	0.000735624	0.000634527	0.000685075	-0.271187	0.24854	2.48e-122	8.76e-106	8.76e-106	-23.5254	21.848	3945	3997
ACCAAGCC	GGCTTGGT	9.62e-05	0.000116724	0.000106483	-0.0388251	0.0418144	7.29e-17	4.03e-20	7.29e-17	-8.34238	9.18739	3229	3373	9.28e-05	0.000167049	0.000129948	-0.153951	0.2023	1.3e-16	1.29e-28	1.3e-16	-8.27366	11.0981	3307	3442	3.67e-05	7.83e-05	5.75e-05	-0.0661146	0.094238	1.5e-07	1.69e-14	1.5e-07	-5.25287	7.67271	3320	3477
ACCAATAA	TTATTGGT	0.000257434	0.000255409	0.000256422	-0.0541589	0.0529164	2.19e-42	4.56e-42	4.56e-42	-13.6451	13.5913	4427	4497	0.00255741	0.00283584	0.00269662	-0.68862	0.714291	0	0	0	-43.4759	45.7878	4527	4572	0.00108679	0.00145553	0.00127116	-0.301273	0.342601	8.52e-180	3.93e-240	8.52e-180	-28.5995	33.1036	4712	4767
ACCAATAT	ATATTGGT	7.2e-06	2.27e-06	4.73e-06	-0.00957725	0.00536881	0.0224784	0.200507	0.200507	-2.28219	1.28011	3950	3976	0.000615106	0.00064769	0.000631398	-0.353242	0.364559	1.19e-100	7e-106	1.19e-100	-21.3011	21.8583	4119	4107	0.000234099	0.000296802	0.00026545	-0.146202	0.165834	3.59e-40	1.84e-50	3.59e-40	-13.2678	14.9399	4285	4260
ACCAATCC	GGATTGGT	3.08e-05	2.72e-05	2.9e-05	-0.0276982	0.0252475	2.35e-06	9.28e-06	9.28e-06	-4.72119	4.43337	2031	2057	0.000485506	0.000418544	0.000452025	-0.447415	0.405532	7.67e-80	4.37e-69	4.37e-69	-18.9232	17.5693	2042	2065	0.000265426	0.00018599	0.000225708	-0.225269	0.183544	2.59e-45	2.89e-32	2.89e-32	-14.1279	11.8259	2063	2097
ACCAATGA	TCATTGGT	0.000193541	0.000171375	0.000182458	-0.0504669	0.0470541	2.72e-32	8.75e-29	8.75e-29	-11.8308	11.1327	3837	3931	0.00411391	0.00355479	0.00383435	-0.959372	0.889159	0	0	0	-55.1842	51.2829	3754	3801	0.00100149	0.000855913	0.0009287	-0.316969	0.2918	7.73e-166	5.12e-142	5.12e-142	-27.453	25.3776	3922	3977
ACCAATGG	CCATTGGT	0.000117732	0.000168936	0.000143334	-0.04471	0.0537982	2.79e-20	2.13e-28	2.79e-20	-9.227	11.0531	2964	2953	0.00276493	0.00201448	0.00238971	-0.893122	0.770177	0	0	0	-45.2101	38.5755	2907	2869	0.000532179	0.000301849	0.000417014	-0.264019	0.199954	4.99e-89	2.74e-51	2.74e-51	-20.0075	15.0664	3001	2983
ACCACAAA	TTTGTGGT	8.83e-05	0.00015395	0.000121131	-0.0271292	0.0358111	1.34e-15	5.02e-26	1.34e-15	-7.99129	10.5514	6051	6068	0.00109797	0.00127809	0.00118803	-0.390027	0.421587	3.86e-178	4.85e-207	3.86e-178	-28.466	30.7151	6074	6065	0.000584903	0.000494816	0.00053986	-0.191765	0.177043	1.16e-97	6.56e-83	6.56e-83	-20.9758	19.2921	6259	6228
ACCACAAC	GTTGTGGT	0.000183041	0.000132074	0.000157558	-0.0532729	0.045831	1.25e-30	1.48e-22	1.48e-22	-11.5054	9.77295	3196	3159	0.000228847	0.000172354	0.0002006	-0.24175	0.207633	1.41e-38	1.79e-29	1.79e-29	-12.9902	11.273	3230	3240	0.000149208	7.55e-05	0.000112373	-0.132378	0.0934619	3.26e-26	4.85e-14	4.85e-14	-10.592	7.5361	3286	3285
ACCACAAT	ATTGTGGT	0.000128286	0.000177682	0.000152984	-0.0354291	0.0420031	5.89e-22	8.79e-30	5.89e-22	-9.63177	11.3357	5183	5121	0.000944795	0.00102461	0.000984704	-0.389944	0.409427	1.46e-153	2.28e-166	1.46e-153	-26.4038	27.4976	5246	5177	0.000564825	0.000514464	0.000539644	-0.203454	0.195763	2.26e-94	3.97e-86	3.97e-86	-20.6124	19.6715	5399	5328
ACCACACA	TGTGTGGT	0.00010126	0.000165737	0.000133498	-0.0266506	0.0333966	1.16e-17	6.83e-28	1.16e-17	-8.55713	10.948	5299	5216	0.00183592	0.00136242	0.00159917	-0.488462	0.382378	1.48e-296	1.43e-220	1.43e-220	-36.8229	31.7135	5280	5236	0.000743379	0.000640157	0.000691768	-0.207414	0.178727	1.34e-123	1.05e-106	1.05e-106	-23.6492	21.9448	5400	5374
ACCACACC	GGTGTGGT	0.00224644	0.00234967	0.00229805	-0.0954287	0.0991771	0	0	0	-40.3481	41.2669	11449	11156	0.000167324	0.000187724	0.000177524	-0.105533	0.113618	1.16e-28	5.95e-32	1.16e-28	-11.1073	11.765	11905	11559	0.000416793	0.000382652	0.000399723	-0.113266	0.109741	3.95e-70	1.55e-64	1.55e-64	-17.7052	16.9642	11960	11605
ACCACACT	AGTGTGGT	3.9e-05	3.22e-05	3.56e-05	-0.02013	0.018311	1.11e-07	1.39e-06	1.39e-06	-5.30789	4.82687	4795	4864	0.000147941	0.000102282	0.000125112	-0.158551	0.132067	1.57e-25	3.83e-18	3.83e-18	-10.4441	8.6839	4888	4951	0.000105139	5.6e-05	8.06e-05	-0.0909021	0.0663789	6.06e-19	8.78e-11	8.78e-11	-8.89109	6.4867	4952	5021
ACCACAGA	TCTGTGGT	3.57e-05	3.02e-05	3.29e-05	-0.0180768	0.0167052	3.78e-07	2.97e-06	2.97e-06	-5.07979	4.67302	5445	5419	0.000308361	0.000295383	0.000301872	-0.214414	0.212826	2.25e-51	2.75e-49	2.75e-49	-15.0796	14.7587	5553	5442	0.00012763	7.09e-05	9.93e-05	-0.0936462	0.0708333	1.17e-22	2.87e-13	2.87e-13	-9.79611	7.30069	5647	5522
ACCACAGC	GCTGTGGT	1.11e-05	7.13e-06	9.12e-06	-0.0110296	0.00880801	0.00458595	0.0231519	0.0231519	-2.83477	2.27092	4562	4598	0.000307087	0.000227914	0.0002675	-0.232233	0.201965	3.6e-51	1.99e-38	1.99e-38	-15.0484	12.9636	4607	4656	0.000104312	4.43e-05	7.43e-05	-0.0914803	0.0607997	8.31e-19	8.01e-09	8.01e-09	-8.85602	5.76826	4639	4673
ACCACAGG	CCTGTGGT	0.000179218	0.000215113	0.000197166	-0.0405202	0.0434246	5.02e-30	1.06e-35	5.02e-30	-11.3846	12.4729	5513	5745	3.3e-05	2.73e-05	3.01e-05	-0.0697282	0.0639138	8.16e-07	7.31e-06	7.31e-06	-4.93157	4.48438	5691	5587	6.83e-07	2.05e-13	3.42e-07	-0.00685167	-3.79e-06	0.473522	0.999687	0.999687	-0.71676	-0.000392822	5719	5600
ACCACAGT	ACTGTGGT	4.14e-05	4.01e-05	4.07e-05	-0.0208597	0.0203898	4.5e-08	7.35e-08	7.35e-08	-5.46989	5.3825	4815	4869	0.000720875	0.000911103	0.000815989	-0.359918	0.40149	1.25e-117	3.73e-148	1.25e-117	-23.0611	25.9283	4690	4747	0.000541585	0.000767567	0.000654576	-0.209558	0.248524	1.44e-90	1.47e-127	1.44e-90	-20.1837	24.0311	4872	4892
[truncated: 3,844 more rows]
