# Supplementary material for: Genome-wide strand asymmetry in massively parallel reporter activity favors genic strands
Source: HighWire-hosted journal article supplement (doi:10.1101/gr.270751.120), 2021-04-20
Supplement: Supplemental_Files.zip [file Supplementary_Data_2_Octamer_FIMO_Motifs.xlsx]

## Sheet: Sheet1
Supplementary Data 2: Octamers with P < 1.6e-16 association with RMC in any of the three datasets enrichment in RNA binding protein (RBP) or transcription factor (TF) motifs
Type	Set	motif_id	motif_alt_id	octamer	start	stop	strand	score	p-value	q-value	matched_sequence
RBP	Van Arensbergen HepG2	M136_0.6	(SNRPB2)_(Drosophila_melanogaster)_(RBD_0.81)	AGTGCAAT	1	8	-	10.8976	6.51e-05	0.023	ATTGCACT
RBP	Van Arensbergen K562	M136_0.6	(SNRPB2)_(Drosophila_melanogaster)_(RBD_0.81)	AGTGCAAT	1	8	-	10.8976	6.51e-05	0.0253	ATTGCACT
RBP	Johnson A549	M136_0.6	(SNRPB2)_(Drosophila_melanogaster)_(RBD_0.81)	AGTGCAAT	1	8	-	10.8976	6.51e-05	0.0186	ATTGCACT
RBP	Van Arensbergen HepG2	M136_0.6	(SNRPB2)_(Drosophila_melanogaster)_(RBD_0.81)	ATTGCACT	1	8	+	10.8976	6.51e-05	0.023	ATTGCACT
RBP	Van Arensbergen K562	M136_0.6	(SNRPB2)_(Drosophila_melanogaster)_(RBD_0.81)	ATTGCACT	1	8	+	10.8976	6.51e-05	0.0253	ATTGCACT
RBP	Johnson A549	M136_0.6	(SNRPB2)_(Drosophila_melanogaster)_(RBD_0.81)	ATTGCACT	1	8	+	10.8976	6.51e-05	0.0186	ATTGCACT
RBP	Van Arensbergen HepG2	M178_0.6	BRUNOL6	CACCACAC	1	7	-	10.185	9.74e-05	0.0425	TGTGGTG
RBP	Van Arensbergen K562	M178_0.6	BRUNOL6	CACCACAC	1	7	-	10.185	9.74e-05	0.048	TGTGGTG
RBP	Johnson A549	M178_0.6	BRUNOL6	CACCACAC	1	7	-	10.185	9.74e-05	0.103	TGTGGTG
RBP	Van Arensbergen HepG2	M178_0.6	BRUNOL6	CCACCACA	2	8	-	10.185	9.74e-05	0.0425	TGTGGTG
RBP	Van Arensbergen K562	M178_0.6	BRUNOL6	CCACCACA	2	8	-	10.185	9.74e-05	0.048	TGTGGTG
RBP	Van Arensbergen HepG2	M178_0.6	BRUNOL6	GTGTGGTG	2	8	+	10.185	9.74e-05	0.0425	TGTGGTG
RBP	Van Arensbergen K562	M178_0.6	BRUNOL6	TGTGGTGG	1	7	+	10.185	9.74e-05	0.048	TGTGGTG
RBP	Van Arensbergen HepG2	M012_0.6	CPEB2	AAAAAAAG	2	8	-	10.454	9.66e-05	0.0677	CTTTTTT
RBP	Van Arensbergen K562	M012_0.6	CPEB2	AAAAAAAG	2	8	-	10.454	9.66e-05	0.0502	CTTTTTT
RBP	Johnson A549	M012_0.6	CPEB2	AAAAAAAG	2	8	-	10.454	9.66e-05	0.0275	CTTTTTT
RBP	Van Arensbergen K562	M012_0.6	CPEB2	AAAAAAGA	1	7	-	10.454	9.66e-05	0.0502	CTTTTTT
RBP	Johnson A549	M012_0.6	CPEB2	AAAAAAGA	1	7	-	10.454	9.66e-05	0.0275	CTTTTTT
RBP	Van Arensbergen HepG2	M012_0.6	CPEB2	CTTTTTTT	1	7	+	10.454	9.66e-05	0.0677	CTTTTTT
RBP	Van Arensbergen K562	M012_0.6	CPEB2	CTTTTTTT	1	7	+	10.454	9.66e-05	0.0502	CTTTTTT
RBP	Johnson A549	M012_0.6	CPEB2	CTTTTTTT	1	7	+	10.454	9.66e-05	0.0275	CTTTTTT
RBP	Johnson A549	M012_0.6	CPEB2	TCTTTTTT	2	8	+	10.454	9.66e-05	0.0275	CTTTTTT
RBP	Van Arensbergen HepG2	M149_0.6	CPEB4	AAAAAAAG	2	8	-	10.8506	9.66e-05	0.0676	CTTTTTT
RBP	Van Arensbergen K562	M149_0.6	CPEB4	AAAAAAAG	2	8	-	10.8506	9.66e-05	0.05	CTTTTTT
RBP	Johnson A549	M149_0.6	CPEB4	AAAAAAAG	2	8	-	10.8506	9.66e-05	0.0274	CTTTTTT
RBP	Van Arensbergen K562	M149_0.6	CPEB4	AAAAAAGA	1	7	-	10.8506	9.66e-05	0.05	CTTTTTT
RBP	Johnson A549	M149_0.6	CPEB4	AAAAAAGA	1	7	-	10.8506	9.66e-05	0.0274	CTTTTTT
RBP	Van Arensbergen HepG2	M149_0.6	CPEB4	CTTTTTTT	1	7	+	10.8506	9.66e-05	0.0676	CTTTTTT
RBP	Van Arensbergen K562	M149_0.6	CPEB4	CTTTTTTT	1	7	+	10.8506	9.66e-05	0.05	CTTTTTT
RBP	Johnson A549	M149_0.6	CPEB4	CTTTTTTT	1	7	+	10.8506	9.66e-05	0.0274	CTTTTTT
RBP	Johnson A549	M149_0.6	CPEB4	TCTTTTTT	2	8	+	10.8506	9.66e-05	0.0274	CTTTTTT
RBP	Johnson A549	M151_0.6	HNRNPH2	AGCCTCCC	2	8	-	9.67857	7.21e-05	0.00914	GGGAGGC
RBP	Van Arensbergen HepG2	M151_0.6	HNRNPH2	CGCCTCCC	2	8	-	9.67857	7.21e-05	0.0205	GGGAGGC
RBP	Johnson A549	M151_0.6	HNRNPH2	CGCCTCCC	2	8	-	9.67857	7.21e-05	0.00914	GGGAGGC
RBP	Johnson A549	M151_0.6	HNRNPH2	CGGGAGGC	2	8	+	9.67857	7.21e-05	0.00914	GGGAGGC
RBP	Van Arensbergen HepG2	M151_0.6	HNRNPH2	GCCTCCCA	1	7	-	9.67857	7.21e-05	0.0205	GGGAGGC
RBP	Johnson A549	M151_0.6	HNRNPH2	GCCTCCCG	1	7	-	9.67857	7.21e-05	0.00914	GGGAGGC
RBP	Johnson A549	M151_0.6	HNRNPH2	GGCCTCCC	2	8	-	9.67857	7.21e-05	0.00914	GGGAGGC
RBP	Van Arensbergen K562	M151_0.6	HNRNPH2	GGGAGGCC	1	7	+	9.67857	7.21e-05	0.0411	GGGAGGC
RBP	Johnson A549	M151_0.6	HNRNPH2	GGGAGGCC	1	7	+	9.67857	7.21e-05	0.00914	GGGAGGC
RBP	Van Arensbergen HepG2	M151_0.6	HNRNPH2	GGGAGGCG	1	7	+	9.67857	7.21e-05	0.0205	GGGAGGC
RBP	Van Arensbergen K562	M151_0.6	HNRNPH2	GGGAGGCG	1	7	+	9.67857	7.21e-05	0.0411	GGGAGGC
RBP	Van Arensbergen HepG2	M151_0.6	HNRNPH2	TGGGAGGC	2	8	+	9.67857	7.21e-05	0.0205	GGGAGGC
RBP	Van Arensbergen K562	M037_0.6	MBNL1	TGCAAGCT	2	8	-	10.7135	5.35e-05	0.0759	AGCTTGC
RBP	Van Arensbergen HepG2	M150_0.6	RALY	ACAAAAAA	2	8	-	11.1322	9.66e-05	0.0226	TTTTTTG
RBP	Johnson A549	M150_0.6	RALY	ACAAAAAA	2	8	-	11.1322	9.66e-05	0.0274	TTTTTTG
RBP	Van Arensbergen HepG2	M150_0.6	RALY	CAAAAAAA	1	7	-	11.1322	9.66e-05	0.0226	TTTTTTG
RBP	Van Arensbergen HepG2	M150_0.6	RALY	TCAAAAAA	2	8	-	11.1322	9.66e-05	0.0226	TTTTTTG
RBP	Van Arensbergen K562	M150_0.6	RALY	TCAAAAAA	2	8	-	11.1322	9.66e-05	0.075	TTTTTTG
RBP	Johnson A549	M150_0.6	RALY	TCAAAAAA	2	8	-	11.1322	9.66e-05	0.0274	TTTTTTG
RBP	Van Arensbergen HepG2	M150_0.6	RALY	TTTTTTGA	1	7	+	11.1322	9.66e-05	0.0226	TTTTTTG
RBP	Van Arensbergen K562	M150_0.6	RALY	TTTTTTGA	1	7	+	11.1322	9.66e-05	0.075	TTTTTTG
RBP	Van Arensbergen HepG2	M150_0.6	RALY	TTTTTTGT	1	7	+	11.1322	9.66e-05	0.0226	TTTTTTG
RBP	Johnson A549	M150_0.6	RALY	TTTTTTGT	1	7	+	11.1322	9.66e-05	0.0274	TTTTTTG
RBP	Van Arensbergen HepG2	M150_0.6	RALY	TTTTTTTG	2	8	+	11.1322	9.66e-05	0.0226	TTTTTTG
RBP	Johnson A549	M150_0.6	RALY	TTTTTTTG	2	8	+	11.1322	9.66e-05	0.0274	TTTTTTG
RBP	Van Arensbergen HepG2	M075_0.6	TIA1	ACAAAAAA	2	8	-	10.3726	9.66e-05	0.0226	TTTTTTG
RBP	Johnson A549	M075_0.6	TIA1	ACAAAAAA	2	8	-	10.3726	9.66e-05	0.0274	TTTTTTG
RBP	Van Arensbergen HepG2	M075_0.6	TIA1	CAAAAAAA	1	7	-	10.3726	9.66e-05	0.0226	TTTTTTG
RBP	Van Arensbergen HepG2	M075_0.6	TIA1	TCAAAAAA	2	8	-	10.3726	9.66e-05	0.0226	TTTTTTG
RBP	Van Arensbergen K562	M075_0.6	TIA1	TCAAAAAA	2	8	-	10.3726	9.66e-05	0.075	TTTTTTG
RBP	Johnson A549	M075_0.6	TIA1	TCAAAAAA	2	8	-	10.3726	9.66e-05	0.0274	TTTTTTG
RBP	Van Arensbergen HepG2	M075_0.6	TIA1	TTTTTTGA	1	7	+	10.3726	9.66e-05	0.0226	TTTTTTG
RBP	Van Arensbergen K562	M075_0.6	TIA1	TTTTTTGA	1	7	+	10.3726	9.66e-05	0.075	TTTTTTG
RBP	Van Arensbergen HepG2	M075_0.6	TIA1	TTTTTTGT	1	7	+	10.3726	9.66e-05	0.0226	TTTTTTG
RBP	Johnson A549	M075_0.6	TIA1	TTTTTTGT	1	7	+	10.3726	9.66e-05	0.0274	TTTTTTG
RBP	Van Arensbergen HepG2	M075_0.6	TIA1	TTTTTTTG	2	8	+	10.3726	9.66e-05	0.0226	TTTTTTG
RBP	Johnson A549	M075_0.6	TIA1	TTTTTTTG	2	8	+	10.3726	9.66e-05	0.0274	TTTTTTG
TF	Van Arensbergen HepG2	M6279_1.02	HMGA1	AAAAATAC	2	8	+	8.72832	9.66e-05	0.0341	AAAATAC
TF	Van Arensbergen HepG2	M6279_1.02	HMGA1	AAAATACA	1	7	+	8.72832	9.66e-05	0.0341	AAAATAC
TF	Van Arensbergen K562	M6279_1.02	HMGA1	AAAATACA	1	7	+	8.72832	9.66e-05	0.0757	AAAATAC
TF	Van Arensbergen HepG2	M6279_1.02	HMGA1	GTATTTTT	1	7	-	8.72832	9.66e-05	0.0341	AAAATAC
TF	Van Arensbergen K562	M6279_1.02	HMGA1	GTATTTTT	1	7	-	8.72832	9.66e-05	0.0757	AAAATAC
TF	Van Arensbergen HepG2	M6279_1.02	HMGA1	TGTATTTT	2	8	-	8.72832	9.66e-05	0.0341	AAAATAC
TF	Johnson A549	M5628_1.02	MGA	AGGCGTGA	1	8	+	10.9273	7.13e-05	0.0375	AGGCGTGA
TF	Van Arensbergen HepG2	M5628_1.02	MGA	TCACGCCT	1	8	-	10.9273	7.13e-05	0.0481	AGGCGTGA
TF	Van Arensbergen K562	M5628_1.02	MGA	TCACGCCT	1	8	-	10.9273	7.13e-05	0.0516	AGGCGTGA
TF	Van Arensbergen HepG2	M6376_1.02	NKX2-5	CACTTGAA	1	7	-	10.929	6.51e-05	0.0231	TCAAGTG
TF	Johnson A549	M6376_1.02	NKX2-5	CACTTGAA	1	7	-	10.929	6.51e-05	0.0374	TCAAGTG
TF	Van Arensbergen HepG2	M6376_1.02	NKX2-5	CTCAAGTG	2	8	+	10.929	6.51e-05	0.0231	TCAAGTG
TF	Van Arensbergen K562	M6376_1.02	NKX2-5	CTCAAGTG	2	8	+	10.929	6.51e-05	0.034	TCAAGTG
TF	Johnson A549	M6376_1.02	NKX2-5	CTCAAGTG	2	8	+	10.929	6.51e-05	0.0374	TCAAGTG
TF	Van Arensbergen HepG2	M6376_1.02	NKX2-5	TCAAGTGA	1	7	+	10.929	6.51e-05	0.0231	TCAAGTG
TF	Van Arensbergen K562	M6376_1.02	NKX2-5	TCAAGTGA	1	7	+	10.929	6.51e-05	0.034	TCAAGTG
TF	Van Arensbergen K562	M6376_1.02	NKX2-5	TCACTTGA	2	8	-	10.929	6.51e-05	0.034	TCAAGTG
TF	Van Arensbergen HepG2	M6376_1.02	NKX2-5	TTCAAGTG	2	8	+	10.929	6.51e-05	0.0231	TCAAGTG
TF	Van Arensbergen K562	M6443_1.02	RARA	CGAGGTCA	2	8	-	12.1515	5.35e-05	0.0195	TGACCTC
TF	Van Arensbergen K562	M6443_1.02	RARA	CTGACCTC	2	8	+	12.1515	5.35e-05	0.0195	TGACCTC
TF	Johnson A549	M6443_1.02	RARA	CTGACCTC	2	8	+	12.1515	5.35e-05	0.0145	TGACCTC
TF	Van Arensbergen K562	M6443_1.02	RARA	GAGGTCAG	1	7	-	12.1515	5.35e-05	0.0195	TGACCTC
TF	Johnson A549	M6443_1.02	RARA	GAGGTCAG	1	7	-	12.1515	5.35e-05	0.0145	TGACCTC
TF	Johnson A549	M6443_1.02	RARA	TGACCTCA	1	7	+	12.1515	5.35e-05	0.0145	TGACCTC
TF	Van Arensbergen K562	M6443_1.02	RARA	TGAGGTCA	2	8	-	12.1515	5.35e-05	0.0195	TGACCTC
TF	Johnson A549	M6443_1.02	RARA	TGAGGTCA	2	8	-	12.1515	5.35e-05	0.0145	TGACCTC
TF	Van Arensbergen K562	M4511_1.02	RXRA	CGAGGTCA	1	8	-	11.2667	7.13e-05	0.0264	TGACCTCG
TF	Johnson A549	M4511_1.02	RXRA	TGACCTCA	1	8	+	11.2788	5.93e-05	0.0168	TGACCTCA
TF	Van Arensbergen K562	M4511_1.02	RXRA	TGAGGTCA	1	8	-	11.2788	5.93e-05	0.0264	TGACCTCA
TF	Johnson A549	M4511_1.02	RXRA	TGAGGTCA	1	8	-	11.2788	5.93e-05	0.0168	TGACCTCA
TF	Johnson A549	M6468_1.02	SNAI1	ACACCTGT	1	8	-	11.2364	9.04e-05	0.0477	ACAGGTGT
TF	Van Arensbergen K562	M6532_1.02	VDR	CGAGGTCA	2	8	-	10.3879	9.74e-05	0.037	TGACCTC
TF	Van Arensbergen K562	M6532_1.02	VDR	CTGACCTC	2	8	+	10.3879	9.74e-05	0.037	TGACCTC
TF	Johnson A549	M6532_1.02	VDR	CTGACCTC	2	8	+	10.3879	9.74e-05	0.0268	TGACCTC
TF	Van Arensbergen K562	M6532_1.02	VDR	GAGGTCAG	1	7	-	10.3879	9.74e-05	0.037	TGACCTC
TF	Johnson A549	M6532_1.02	VDR	GAGGTCAG	1	7	-	10.3879	9.74e-05	0.0268	TGACCTC
TF	Johnson A549	M6532_1.02	VDR	TGACCTCA	1	7	+	10.3879	9.74e-05	0.0268	TGACCTC
TF	Van Arensbergen K562	M6532_1.02	VDR	TGAGGTCA	2	8	-	10.3879	9.74e-05	0.037	TGACCTC
TF	Johnson A549	M6532_1.02	VDR	TGAGGTCA	2	8	-	10.3879	9.74e-05	0.0268	TGACCTC
