# Supplementary material for: Genome-wide strand asymmetry in massively parallel reporter activity favors genic strands
Source: HighWire-hosted journal article supplement (doi:10.1101/gr.270751.120), 2021-04-20
Supplement: Supplemental_Files.zip [file Supplementary_Data_3_gkmsvm_kmer_hyperplane_dists.xls]

## Sheet: gkmSVM_elevenmer_scores_top_and
Supplementary Data 3: gkm-SVM calcualted hyperplane distances for k-mers and reverse complements from three whole genome data sets.
Elevenmer	Elevenmer_Revcomp	VanArens_K562_kmer_gkmsvm_value	VanArens_K562_kmer_revcomp_gkmsvm_value	VanArens_HepG2_kmer_gkmsvm_value	VanArens_HepG2_kmer_revcomp_gkmsvm_value	Johnson_kmer_gkmsvm_value	Johnson_kmer_revcomp_gkmsvm_value
AAGTTTCCAAA	TTTGGAAACTT	-0.615236	1.78191	-0.919329	-0.150733	-0.060031	0.257831
AATAAATTAGT	ACTAATTTATT	-0.191954	1.76946	-0.291232	0.417255	-0.228096	0.146716
AACACACAAAC	GTTTGTGTGTT	-0.47708	1.73541	-0.836108	0.179904	-0.293826	0.483001
AACACACATTA	TAATGTGTGTT	-0.168313	1.64081	-0.240002	0.301458	-0.194273	0.236918
GTTTGTGGGAA	TTCCCACAAAC	1.62807	-0.965354	0.360296	-0.104589	0.191058	0.116868
AAGTTTCCAAG	CTTGGAAACTT	-0.606812	1.62326	-0.71359	-0.326201	-0.255649	-0.094404
ATTTTTTCTAG	CTAGAAAAAAT	1.62234	-0.660477	-0.639744	-0.382242	0.29834	-0.091335
CAGGACATTTC	GAAATGTCCTG	1.62156	0.049055	-0.369684	0.64622	-0.340221	-0.351993
AAATAAATTAG	CTAATTTATTT	-0.208748	1.62153	-0.346666	0.079198	-0.077624	-0.050916
AAACACACATT	AATGTGTGTTT	-0.566315	1.62149	-0.546767	0.012828	-0.987506	0.01772
CATATATAAAA	TTTTATATATG	-0.733884	1.61319	0.450611	0.328783	0.119495	0.151509
CTAGAAAAAAG	CTTTTTTCTAG	-0.84256	1.6121	0.012923	-0.605419	0.117182	0.221044
AATTTATTTAT	ATAAATAAATT	1.58842	-0.445101	0.406928	0.012563	-0.77231	-0.569462
AATGTGTGTTG	CAACACACATT	1.57966	-0.146836	-0.085976	-0.432448	0.147405	-0.331592
CAAGTTTCCAA	TTGGAAACTTG	-0.641795	1.57899	-0.82522	-0.040031	-0.268736	0.200287
ACACACAAACC	GGTTTGTGTGT	-0.307113	1.57316	-1.01717	0.67384	-0.491182	0.925866
CAGTTTCCAAA	TTTGGAAACTG	-0.760288	1.56774	-0.779966	-0.159829	-0.323827	0.131521
AATTTATTAAT	ATTAATAAATT	1.56745	-0.451602	0.672199	0.113273	-0.014409	-0.536525
GTTTGTTGGAA	TTCCAACAAAC	1.56732	-0.824537	0.426758	-0.443954	0.160375	0.17759
AAAAAAATTAG	CTAATTTTTTT	0.045886	1.56708	-0.297231	-0.351343	0.025885	-0.400055
AACACACATTC	GAATGTGTGTT	0.054895	1.56367	-0.125533	0.103842	-0.323139	0.334614
AAATAAAACAG	CTGTTTTATTT	0.329399	1.54883	-0.933106	0.505752	-0.564469	0.4492
AGTTTCCAAAT	ATTTGGAAACT	-0.400209	1.54803	-0.751985	-0.082826	0.010332	0.562753
AAAATAAAAGT	ACTTTTATTTT	-0.723752	1.5437	-1.22519	0.512976	-0.127503	0.938361
GGCTTCTTCCA	TGGAAGAAGCC	0.336882	1.54189	-0.059193	-0.732804	-0.667023	-0.428886
TTTCCAACAAA	TTTGTTGGAAA	-0.766204	1.54028	0.099595	-0.205388	0.183965	0.48203
CAATAATCAAA	TTTGATTATTG	0.007307	1.53956	-0.14428	-0.381564	-0.003722	0.788857
CACACACATTA	TAATGTGTGTG	-0.449625	1.53543	-0.663882	0.558582	-0.172724	0.497761
ATTAATAAATA	TATTTATTAAT	-0.815253	1.53497	0.067957	0.955561	-0.487894	0.472789
AAAACAAAGGT	ACCTTTGTTTT	0.083536	1.5343	-0.534636	0.56807	-0.198515	0.238934
GAACACACAAA	TTTGTGTGTTC	-0.407369	1.53132	-0.605079	0.17958	-0.2132	0.079042
CTAATTTTTTC	GAAAAAATTAG	1.53124	0.048922	-0.524421	-0.312057	0.210496	-0.432549
ACACATATACT	AGTATATGTGT	-0.817139	1.52615	-0.45456	-0.136142	-0.275622	0.846309
GTATATGTGAA	TTCACATATAC	1.52129	-0.924654	-0.266683	-0.339248	-0.007634	-0.484656
GTCTGTCCAAA	TTTGGACAGAC	-0.768303	1.51909	-0.199094	0.134038	0.16465	0.071687
ATTTATTAATG	CATTAATAAAT	1.51625	-0.571254	1.04359	-0.1293	0.356057	-1.18215
ACACATATACA	TGTATATGTGT	-0.929727	1.51554	0.048169	0.069646	-0.005264	0.143516
AAAAAATTAGT	ACTAATTTTTT	-0.377691	1.50733	-0.057885	-0.155329	-0.398383	-0.083434
TAGTTTCCAAA	TTTGGAAACTA	-0.642601	1.50721	-0.79839	-0.171822	-0.309313	0.255096
AACCCAGGAGG	CCTCCTGGGTT	1.5049	-1.02676	-0.426174	0.549143	0.39625	-0.69757
AGAAAAAACAA	TTGTTTTTTCT	-0.359405	1.50178	-0.865012	-0.11569	0.296909	0.633212
AAATAAAATAG	CTATTTTATTT	-0.436896	1.50023	-0.663481	0.426967	-0.505208	-0.036535
ACTTCTAATAT	ATATTAGAAGT	1.49912	0.14766	0.093269	0.250604	-0.037792	0.559197
GTATTTGTGTA	TACACAAATAC	1.49845	-0.847276	-0.38451	-0.3676	0.514102	-0.405097
ATTCCCACAAA	TTTGTGGGAAT	-0.978696	1.49833	-0.145577	0.13617	0.026014	0.432805
CAATAAATTAG	CTAATTTATTG	-0.32176	1.4949	-0.758586	0.465677	-0.10099	0.62501
CTTCCAACAAA	TTTGTTGGAAG	-0.510087	1.49128	0.050345	0.141276	0.269664	0.098177
AGTATATGTGA	TCACATATACT	1.49112	-1.01566	-0.056351	-0.465478	0.567151	-0.428019
AAAACACACAT	ATGTGTGTTTT	-1.05226	1.49006	-0.965692	0.525044	-1.35722	-0.018478
AACAAAACAAA	TTTGTTTTGTT	-0.699595	1.48985	-0.68954	0.792854	-0.494593	-0.576916
CACACACAAAC	GTTTGTGTGTG	-0.262478	1.48864	-0.825093	0.357646	-0.602591	0.855465
ATGTTTGTGTA	TACACAAACAT	1.4879	-1.50578	0.357709	-0.78727	0.308018	-0.622073
TCCCACAAACA	TGTTTGTGGGA	-0.30394	1.48693	-0.26601	0.72436	0.009322	0.19963
AAGAAAAAATC	GATTTTTTCTT	-1.1921	1.4864	-0.073949	-0.241822	0.027806	-0.764438
CACTGGACAAG	CTTGTCCAGTG	1.48519	-0.173753	-0.16409	0.460384	0.464881	0.081544
CTAATTTATTA	TAATAAATTAG	1.48478	-0.125497	0.136432	-0.315991	0.587995	0.008933
AAAATAAAAGA	TCTTTTATTTT	-0.860279	1.48133	-1.28307	0.712882	0.143064	0.563566
AGAAAAAATCA	TGATTTTTTCT	-0.853078	1.48083	-0.172007	0.202131	-0.195493	-0.573372
AATAAATAAAT	ATTTATTTATT	-0.84352	1.48072	0.168274	0.748977	-0.457939	-1.00843
TCACATATACA	TGTATATGTGA	-1.12825	1.48052	0.037251	0.149438	-0.157661	-0.135643
AATGTGGTAGA	TCTACCACATT	1.48036	0.255942	-0.065083	-0.48277	-0.117039	-0.507277
AAACACACAAA	TTTGTGTGTTT	-0.515047	1.48036	-0.85604	0.649645	-0.049381	-0.155825
AATAAAATAGT	ACTATTTTATT	-0.122221	1.47974	-0.231724	0.922123	-0.401434	0.235475
TTCCAACAAAA	TTTTGTTGGAA	-1.11827	1.47759	0.082111	0.126144	-0.36395	0.275532
ATGTGTTTTGG	CCAAAACACAT	1.47661	-0.638031	0.796952	-1.24922	-0.17906	-0.345858
TAAATAAATTA	TAATTTATTTA	-0.170543	1.47504	-0.250374	-0.014781	-0.001274	-0.284393
ATTCACATATA	TATATGTGAAT	-0.454905	1.47461	-0.669318	0.048168	-0.379592	-0.447989
CATTCACACAA	TTGTGTGAATG	-0.37925	1.47392	-0.269436	0.515823	-0.130101	0.396991
ATGTTTGTGGG	CCCACAAACAT	1.47172	-0.104958	0.738959	-0.236298	0.153191	-0.130103
AAGTCCCATCT	AGATGGGACTT	-0.566991	1.4711	-0.392646	0.162506	0.092237	0.527078
AATAATCAAAG	CTTTGATTATT	0.638231	1.47025	-0.029544	-0.408526	0.062012	0.174743
AAAGTTTCCAA	TTGGAAACTTT	-0.688416	1.46859	-0.849014	-0.102103	0.132478	0.280359
ATTCCAACAAA	TTTGTTGGAAT	-0.653142	1.46594	0.11233	0.377724	0.063674	0.709646
ACACACATTAC	GTAATGTGTGT	-0.238713	1.46569	-0.360324	0.643643	0.375072	0.629909
GACACACATTA	TAATGTGTGTC	-0.241392	1.46467	-0.219155	0.437884	0.337643	0.401211
GAAAAAACAAA	TTTGTTTTTTC	-0.567874	1.46387	-0.70621	0.00832	0.820454	-0.434493
AACACACAAAT	ATTTGTGTGTT	-0.859367	1.4619	-0.432174	0.275639	-0.475427	0.211661
CATCAAAATAC	GTATTTTGATG	-0.31539	1.46158	0.185389	0.103215	0.074328	0.419963
CACACACATTC	GAATGTGTGTG	-0.226416	1.45829	-0.549413	0.360967	-0.30159	0.595457
AATACACAAAC	GTTTGTGTATT	-0.470839	1.45781	-0.789248	-0.100752	-0.375685	0.291342
GACACACAAAC	GTTTGTGTGTC	-0.276759	1.4574	-0.847534	0.221612	-0.294917	0.616025
GATGTGGAAAC	GTTTCCACATC	1.45706	-0.095436	0.051291	-0.999375	0.387755	0.587461
ATTCTCACAAC	GTTGTGAGAAT	-0.394726	1.4565	0.108182	-0.093485	-0.067741	0.095751
AAATAAAATAA	TTATTTTATTT	-0.776861	1.45624	-0.794581	0.40583	-0.184656	-0.34937
GAAGTTTCCAA	TTGGAAACTTC	-0.457029	1.45618	-0.708983	-0.163046	-0.046776	0.636108
AAACACACATG	CATGTGTGTTT	-0.652321	1.454	-0.814327	0.264948	-1.04062	0.037468
ATTTATTTATA	TATAAATAAAT	1.45357	-0.621543	0.950093	-0.462794	-1.00218	-0.903142
CTAGAAAAAAA	TTTTTTTCTAG	-1.02077	1.45357	-0.275503	-0.542391	-0.254312	0.411757
ACCAACAACAT	ATGTTGTTGGT	0.248893	1.45303	-0.545474	0.406932	-0.66446	-0.140284
GTTTGTGTGTA	TACACACAAAC	1.44839	-0.722341	0.353061	-0.614073	0.914079	-0.677765
TAAATAAAACA	TGTTTTATTTA	0.402244	1.44688	-0.880772	0.056116	-0.7854	0.436648
AGTCCCATCTA	TAGATGGGACT	-0.164656	1.44598	-0.442025	0.415089	0.124161	0.58312
GTATATGTGAC	GTCACATATAC	1.44589	-1.14394	0.005675	-0.0475	0.168485	-0.320609
AAAAATAAATG	CATTTATTTTT	-1.47303	1.44276	-0.743278	0.670271	-0.727893	-0.387321
AAATAATATAA	TTATATTATTT	-0.086313	1.439	-0.721976	0.489085	1.0923	-0.246798
CTAATTTTTTA	TAAAAAATTAG	1.43824	-0.24681	-0.087763	-0.435201	0.050149	-0.136623
AAATGTGTGTT	AACACACATTT	1.43762	-0.5935	0.01558	-0.02783	0.105537	-0.312453
AAAAGAAGGAG	CTCCTTCTTTT	1.43659	-0.280723	0.565497	0.843227	-0.305568	0.25572
AAACAAAACAA	TTGTTTTGTTT	-0.422371	1.43651	-0.844608	0.542758	-0.36044	-0.294059
ATATATAAAAA	TTTTTATATAT	-0.811043	1.43621	-0.08506	0.345119	0.623099	0.504979
AAACACACATC	GATGTGTGTTT	-0.637916	1.43618	-0.93225	0.313155	-1.09475	-0.088382
AAAACAAATGT	ACATTTGTTTT	-0.282396	1.43595	-0.749818	0.786473	-0.490143	0.225921
AAAAAATGAGT	ACTCATTTTTT	0.383416	1.43556	-0.52624	0.124808	0.033332	-0.470581
CAAAATTGCAG	CTGCAATTTTG	0.101791	1.43368	-0.1008	-0.381443	0.377847	0.1452
CCATCAAAATA	TATTTTGATGG	-0.338127	1.43344	-0.283939	0.275582	-0.262836	0.493454
ACACACATTAG	CTAATGTGTGT	-0.310722	1.43257	-0.387423	0.554478	-0.370168	0.507595
TTACAAGTCAA	TTGACTTGTAA	-0.396112	1.43166	-0.622538	0.616004	0.297376	0.044527
AGAAACACAAA	TTTGTGTTTCT	-0.902148	1.43105	-0.811677	0.806705	-0.409956	0.720825
GATTTTTTCTA	TAGAAAAAATC	1.43072	-0.589107	-0.488838	-0.345046	-0.235713	0.018549
GAAAGTCACTA	TAGTGACTTTC	-0.463946	1.43054	-0.488343	0.406251	-0.772357	0.075588
AAAAAATTAGA	TCTAATTTTTT	-0.172851	1.42944	0.033102	-0.317082	0.090462	-0.101678
GAAATGTCCTA	TAGGACATTTC	0.062106	1.42816	0.334604	-0.307301	-0.49706	0.121115
CACACACAATC	GATTGTGTGTG	-0.661894	1.42647	-0.47433	1.11022	-0.128096	0.6905
ACTTTTATTTA	TAAATAAAAGT	1.42136	-0.91492	0.33688	-1.31841	1.11685	-0.390915
ATGTGTGAATG	CATTCACACAT	1.41857	-0.076422	0.50092	-0.345303	0.124931	0.204354
AACACAAACAT	ATGTTTGTGTT	-1.58678	1.41839	-0.704654	0.85628	-0.41789	0.731041
ATTTCCACATC	GATGTGGAAAT	-0.039254	1.41575	-0.91456	0.057692	0.099115	0.382442
ATGTGTGTTTG	CAAACACACAT	1.4157	-0.761181	0.444776	-0.736874	0.044701	-1.09951
ATTTATTTATG	CATAAATAAAT	1.41545	-0.440382	1.15235	0.238882	-0.821623	-1.37784
AGTTTCCACAT	ATGTGGAAACT	-0.429344	1.41542	-1.23439	0.27485	0.493389	0.557409
CACATCTAGAA	TTCTAGATGTG	-0.142367	1.41541	-0.929167	-0.006991	-0.01004	0.233922
GTTCTCACAAC	GTTGTGAGAAC	-0.451845	1.41479	0.019592	0.282143	0.003992	0.142556
CTGTTTGTGTA	TACACAAACAG	1.41304	-1.30286	0.212201	-0.544785	-0.027277	-0.278642
CCCATATCAAC	GTTGATATGGG	-0.143654	1.41247	-0.329574	0.65086	0.519806	0.076878
CAACACACATG	CATGTGTGTTG	-0.232841	1.41217	-0.700008	0.166144	-0.384705	0.167152
CAAATGTCCTG	CAGGACATTTG	-0.315275	1.41109	0.57381	-0.269875	-0.47087	-0.441604
AAAATGGGCCT	AGGCCCATTTT	1.41087	0.1058	0.386725	-0.648446	0.715942	0.163824
CAGACAAAATC	GATTTTGTCTG	-0.340774	1.40971	-0.291344	-0.121118	-0.239871	-0.111027
AACACAGATTC	GAATCTGTGTT	0.10548	1.40939	0.252777	-0.201104	-0.381943	-0.113379
AGAAACCTAAA	TTTAGGTTTCT	-0.658244	1.409	-0.17662	-0.20738	-0.30255	0.207147
CTTTGTGGGAA	TTCCCACAAAG	1.40816	-1.10165	0.089492	0.093435	0.311578	0.216519
CAGTTTCCAAG	CTTGGAAACTG	-0.751406	1.40776	-0.573542	-0.335185	-0.5194	-0.220906
ATTCACACAAA	TTTGTGTGAAT	-0.732281	1.40749	-0.290636	0.23126	-0.5081	0.727795
CAAAAAATTAG	CTAATTTTTTG	-0.009636	1.40636	-0.164882	-0.241144	-0.224637	0.167628
ATACAAGTCAA	TTGACTTGTAT	-0.584669	1.40551	-0.790546	0.195173	0.544924	0.423692
CCAGCTTCTCC	GGAGAAGCTGG	-0.200714	1.40476	-0.727968	0.017368	0.816193	0.168019
ACACACATTAT	ATAATGTGTGT	-0.301632	1.40439	-0.369826	0.540046	-0.120688	0.369528
CTAGAAAAAAC	GTTTTTTCTAG	-0.542342	1.40397	-0.161106	-0.226187	-0.265042	0.586241
ATATATAAAAC	GTTTTATATAT	-0.401235	1.40376	-0.330377	0.218485	0.247068	0.640323
AATACACAAAA	TTTTGTGTATT	-0.397649	1.4027	-0.749829	-0.177242	-0.040872	0.552307
ATTGTGTGTGG	CCACACACAAT	1.40108	-0.623227	1.20944	-0.696263	0.74363	-0.093225
CTAAATAAAAG	CTTTTATTTAG	-0.60505	1.39817	-1.2623	0.200003	-0.357888	0.539133
ATATATAAAAT	ATTTTATATAT	-0.494118	1.39774	0.149315	0.447829	0.422251	0.68458
CAACACACATC	GATGTGTGTTG	-0.218436	1.39435	-0.817931	0.214351	-0.438838	0.041302
ACCCAGGAGGG	CCCTCCTGGGT	1.39328	-0.44119	-0.021187	0.431466	0.173807	-0.218001
AAGAATAATTA	TAATTATTCTT	0.015432	1.39289	-0.373531	0.288325	0.295813	-0.645432
AAAAATGGGCC	GGCCCATTTTT	1.39188	0.032952	0.396234	-0.485295	0.356081	0.198169
AGAAATGTCCT	AGGACATTTCT	-0.026313	1.39058	0.165342	-0.047402	-0.469662	-0.181038
AAATGTGGTTG	CAACCACATTT	1.39011	-0.007873	0.345054	-1.07632	-0.245026	-0.818785
ATACACAAACA	TGTTTGTGTAT	-0.908315	1.39003	-0.963205	0.005248	-0.481736	0.011869
CCCAGGAGGGG	CCCCTCCTGGG	1.3896	0.09686	0.305468	0.304988	-0.152883	0.164679
ATACACAAATA	TATTTGTGTAT	-0.832835	1.38821	-0.231819	-0.14566	-0.342394	0.107217
GAATGTGTGTC	GACACACATTC	1.38752	-0.018183	0.240269	-0.104686	0.498907	0.208777
ATATATGTGAA	TTCACATATAT	1.38699	-0.78749	-0.206584	-0.396092	-0.199423	-0.543834
ATGTTTGTGGA	TCCACAAACAT	1.38699	-0.293486	0.789205	-0.843283	0.018674	-0.208724
ACAAACATCAA	TTGATGTTTGT	-0.61746	1.38651	-0.541611	0.398628	-0.425228	-0.022543
TCATATATAAA	TTTATATATGA	-0.785941	1.38598	0.673083	0.313071	-0.43261	-0.260546
ATTTATTTATC	GATAAATAAAT	1.38577	-0.588808	0.576299	-0.123485	-0.488647	-0.772763
AAGATGGGACT	AGTCCCATCTT	1.38554	-0.391808	0.239385	-0.490409	0.41553	0.15043
ATGATCTTGGC	GCCAAGATCAT	1.38548	-0.316174	0.536839	-0.086737	-0.293152	0.024182
CTTTGTTGGAA	TTCCAACAAAG	1.38358	-0.759177	0.099868	0.091206	0.267336	-0.028746
CCACAAACATA	TATGTTTGTGG	-0.308227	1.38316	-0.458674	0.811368	-0.437935	0.304249
AATACACAAAT	ATTTGTGTATT	-0.601472	1.3823	-0.239739	0.067385	-0.310545	0.107492
CCCCTCCTGGC	GCCAGGAGGGG	-0.121791	1.38178	0.084751	0.325815	0.089588	-0.475919
AATTCACACAA	TTGTGTGAATT	-0.522973	1.38172	-0.724212	0.50206	-0.397948	0.834991
GTACACAAATA	TATTTGTGTAC	-0.657638	1.38142	-0.192794	-0.082023	0.004593	0.240089
ACAATAAATGA	TCATTTATTGT	0.401352	1.38095	-0.745464	0.621257	-0.332784	0.479873
CAAAAAACACA	TGTGTTTTTTG	-0.701526	1.38068	-0.592673	0.339617	-0.566891	0.0704
TCTGGACTTAA	TTAAGTCCAGA	1.38068	-0.03998	0.198187	-0.06502	-0.045918	0.463755
ACACACATTCC	GGAATGTGTGT	-0.231914	1.38003	-0.309753	0.477993	0.088018	0.913582
GTGACTTAGAA	TTCTAAGTCAC	1.37986	-0.461733	-0.205457	-0.607117	0.020094	0.027347
CATCTGGATTA	TAATCCAGATG	1.37976	-0.123064	0.470261	-0.313674	-0.047077	-0.286483
ACACTCATTAC	GTAATGAGTGT	-0.346774	1.37943	-0.586484	0.174043	0.128327	0.063217
CAAGTTTCCAG	CTGGAAACTTG	-0.827922	1.37941	-0.623788	-0.276013	-0.21051	0.269263
CAAAACACATC	GATGTGTTTTG	-0.33016	1.37746	-0.938202	0.348171	-0.30217	-0.146433
GATCAGGAAAA	TTTTCCTGATC	0.255016	1.3769	-0.11127	0.021408	-0.502735	0.748697
AAATAAATTAT	ATAATTTATTT	-0.263339	1.3765	-0.451937	0.186133	-0.302656	-0.076124
CTGATTTTTTC	GAAAAAATCAG	1.37617	-0.474265	0.317929	-0.20908	-0.105503	-0.204577
AATGTGTTTTG	CAAAACACATT	1.37572	-0.621385	0.527949	-0.959078	-0.502948	-0.291867
AAATGTGACTT	AAGTCACATTT	1.37501	-0.397982	-0.215338	-0.345485	-0.846402	-0.324979
AATACACAAAG	CTTTGTGTATT	-0.422105	1.37376	-0.563353	0.143099	-0.576228	0.307456
TCCAAAACACA	TGTGTTTTGGA	-0.73304	1.37372	-1.29377	1.0854	-0.510084	0.212691
TTATATGTGAA	TTCACATATAA	1.37271	-0.963018	0.085673	-0.276907	-0.187821	-0.711495
CAAAATAAATG	CATTTATTTTG	-1.1209	1.37261	-0.984394	0.775586	-0.727097	-0.523934
AAAAAGGGGCC	GGCCCCTTTTT	1.37255	-0.507192	0.032926	-0.551192	0.458647	0.078384
AGTCTGTCCAA	TTGGACAGACT	-0.529909	1.37188	0.038458	0.09842	0.115748	0.146293
ACCACAAACAT	ATGTTTGTGGT	-0.313105	1.37159	-0.487035	1.03244	0.094232	-0.068525
AAAAAACACAC	GTGTGTTTTTT	-0.568299	1.36969	-0.367611	0.311698	-0.684653	0.144017
AGTTGATATGG	CCATATCAACT	1.3681	-0.208623	0.72685	-0.150128	-0.082391	0.363479
AAGTTTCCAAC	GTTGGAAACTT	-0.594855	1.36721	-0.520377	-0.206567	-0.10884	0.214925
TCTAAGTCACA	TGTGACTTAGA	-0.259266	1.36715	-0.451533	0.093499	-0.278401	0.231808
ACTTGAGGTCA	TGACCTCAAGT	-1.04502	1.36473	0.064247	-0.809898	-0.020993	-0.09107
TTGCTTGGAAA	TTTCCAAGCAA	1.36394	-0.177358	0.345833	-0.492282	-0.503465	-0.240707
GCCCATATCAA	TTGATATGGGC	-0.097102	1.36265	-0.321701	0.371782	0.294061	0.07524
AAATAAAACAT	ATGTTTTATTT	-0.431955	1.36233	-1.05391	0.134099	-0.652546	0.61235
GGAAAAAATAA	TTATTTTTTCC	-0.030266	1.3619	-0.422154	-0.034458	0.232015	0.29294
CTCTAAGTCAC	GTGACTTAGAG	-0.471858	1.36176	-0.547998	-0.006093	0.021765	0.319462
ATTTTTTCTAC	GTAGAAAAAAT	1.36132	-0.507374	-0.761382	-0.575165	0.315542	0.454649
ATTCTTTCCAA	TTGGAAAGAAT	-0.077727	1.3601	0.085631	0.214035	0.379203	-0.05412
GAAAACACAAA	TTTGTGTTTTC	-0.421535	1.3599	-0.81116	0.852861	0.125375	-0.030824
TAAATAAAAGA	TCTTTTATTTA	-1.05155	1.35895	-1.37633	0.536934	-0.120147	0.741777
ACACTCATTAT	ATAATGAGTGT	-0.034217	1.35889	-0.931262	0.138785	-0.482989	-0.040575
CTCTGTCCAAA	TTTGGACAGAG	-1.02793	1.35864	-0.420267	0.362827	0.114874	-0.176222
CCAGGAGGGGG	CCCCCTCCTGG	1.35771	-0.01319	0.167474	0.111193	-0.440802	0.160354
CAATAATATAA	TTATATTATTG	-0.106064	1.35546	-0.570692	0.165253	0.90605	0.095184
ACTTGGAAGGA	TCCTTCCAAGT	1.35533	-0.92684	-0.033405	0.104266	-0.040367	0.020451
AAATACACAAA	TTTGTGTATTT	-0.413776	1.35495	-0.595186	0.23365	-0.275399	0.174052
AATTTATTTAG	CTAAATAAATT	1.35389	-0.264457	0.039249	-0.158058	-0.207284	-0.106952
ACAAACATCAT	ATGATGTTTGT	-0.335232	1.35366	-0.732856	0.629377	-0.456648	-0.011052
ATTTTTTTATC	GATAAAAAAAT	1.35349	-0.122106	0.43716	-0.259899	-0.207079	-0.362705
ACACAAACATA	TATGTTTGTGT	-1.03042	1.35337	-0.750583	0.818604	-0.734438	0.685515
CAAAAATCAAA	TTTGATTTTTG	-0.641503	1.3532	0.259416	0.189592	0.407963	0.223922
AATGTGTGTTA	TAACACACATT	1.35288	-0.004172	0.455594	-0.347548	0.065718	-0.469157
TTCTGTCCAAA	TTTGGACAGAA	-0.685027	1.35286	-0.522652	0.376177	0.358751	0.008469
AATAAATGAGT	ACTCATTTATT	0.489422	1.35167	-0.288041	0.031527	0.251772	0.236415
CCACCATGCCC	GGGCATGGTGG	-0.02761	1.35163	-0.708717	0.13357	-0.675593	-0.164973
CTTTTTTCTAC	GTAGAAAAAAG	1.35107	-0.689456	-0.727058	-0.18	0.238247	0.663167
CAATAAATGAG	CTCATTTATTG	0.702298	1.35051	-0.400011	0.321217	-0.014156	0.550797
TGACTTGTAAA	TTTACAAGTCA	1.35049	-0.028533	0.603799	-0.483995	-0.155374	-0.241276
ATCAAAGGTCC	GGACCTTTGAT	0.154783	1.35037	-0.506117	0.159604	0.344152	0.249344
AAGATGGGCCT	AGGCCCATCTT	1.3501	0.050393	0.648237	-0.394657	0.14842	0.392188
ACACACAAACA	TGTTTGTGTGT	-0.450074	1.34944	-0.714246	0.32792	-0.495575	0.720093
AAAAAACACAA	TTGTGTTTTTT	-0.640653	1.34936	-0.530903	0.507633	-0.701419	-0.273998
AGCCAAGATCA	TGATCTTGGCT	-0.165724	1.34931	-0.175219	0.262715	0.238308	-0.500867
GGCCCATTTTA	TAAAATGGGCC	0.101839	1.34881	-0.29973	0.501157	0.008706	0.854207
ACACACAAACT	AGTTTGTGTGT	-0.461708	1.34806	-1.08105	0.629273	-0.343943	0.645942
GAAATATCCTA	TAGGATATTTC	-0.07378	1.34797	0.280139	0.425672	-0.312755	0.065292
ACCTGGCAAAG	CTTTGCCAGGT	-0.295706	1.34778	-0.34971	0.188044	0.369352	0.051772
CTTGGAAACTA	TAGTTTCCAAG	1.34724	-0.633718	-0.347178	-0.591966	-0.097331	-0.504886
AATAACAACAG	CTGTTGTTATT	-0.284817	1.34701	-0.638904	-0.092501	-0.037637	0.180078
AGAGAGGCCCT	AGGGCCTCTCT	1.34676	0.015904	-0.669749	0.08466	-0.167986	0.519022
ATAAATAAAAG	CTTTTATTTAT	-0.925909	1.3461	-1.04677	0.825953	-0.356441	0.791961
AAATGTGATTG	CAATCACATTT	1.34599	-0.618863	0.283252	-0.681119	0.635428	-0.876137
ATTGTGTGTGC	GCACACACAAT	1.3457	-0.650262	0.866268	-0.834709	0.809906	-0.096476
CCACATATATA	TATATATGTGG	-0.822356	1.34418	-0.576078	0.010286	-0.052832	-0.524186
AAAAAATACAG	CTGTATTTTTT	-0.083693	1.34411	-0.402317	0.008335	0.164452	-0.028273
AACACAAACAG	CTGTTTGTGTT	-1.38386	1.34353	-0.462169	0.710772	-0.07446	0.395746
ACACATCTAGA	TCTAGATGTGT	-0.260948	1.34349	-0.53033	-0.195283	0.103383	0.414768
ATTTTTTCTTC	GAAGAAAAAAT	1.34235	-1.01593	-0.226858	-0.017486	-0.661924	0.605198
AGTGCTTTGGG	CCCAAAGCACT	1.34178	-0.323973	0.666076	-0.71278	-0.635087	-0.360347
ATTCACACATA	TATGTGTGAAT	-0.396015	1.34174	-0.588699	-0.08286	-0.042557	0.091976
AAAAATCCAAT	ATTGGATTTTT	-0.526758	1.34092	-0.338371	0.542909	-0.694984	-0.080299
CACAAAGGTAA	TTACCTTTGTG	-0.514706	1.3405	-0.604138	0.415908	-0.276227	0.066921
ATATTTGTGTA	TACACAAATAT	1.34011	-1.16414	-0.274057	-0.555982	0.692726	-0.532475
CACTGGAAAAG	CTTTTCCAGTG	1.33995	-0.063625	-0.018389	0.047382	-0.477335	0.449192
GTTTATTGAGA	TCTCAATAAAC	1.33863	-0.704169	0.19502	-0.20581	0.876946	-0.291727
AAAAAACACAG	CTGTGTTTTTT	-0.182971	1.33826	-0.540456	0.276919	-0.633068	-0.002219
AAAAATAAAAG	CTTTTATTTTT	-1.1949	1.33789	-0.703551	1.08298	0.356493	0.319573
TGAAACACAAA	TTTGTGTTTCA	-0.669049	1.33773	-0.751771	0.495858	-0.165971	0.549753
ACCAACAGCAT	ATGCTGTTGGT	0.093129	1.3367	-0.097297	0.435412	0.016137	-0.588334
CAAAACACATG	CATGTGTTTTG	-0.346454	1.33669	-0.740925	0.716824	-0.303206	-0.191875
CTCCTGGGTTC	GAACCCAGGAG	-0.768351	1.33655	0.458968	-0.343891	-0.475876	0.280504
AAATGCTTGAA	TTCAAGCATTT	1.33618	-0.340317	-0.197331	-0.53533	-0.08552	-0.359038
AATGTGGTTGA	TCAACCACATT	1.33584	0.28799	0.308864	-1.40801	0.032124	-0.884703
AATAAAAAAAT	ATTTTTTTATT	-0.224416	1.33523	-0.255937	0.741923	-0.068922	0.017595
AGGCTTCTTCC	GGAAGAAGCCT	-0.109172	1.3343	-0.141521	-0.517975	-0.40675	-0.440012
ATGGTGTGTGA	TCACACACCAT	1.33396	-0.311643	0.787808	-0.600361	0.369525	-0.086604
AAAACACACAA	TTGTGTGTTTT	-0.732499	1.33354	-0.977718	1.14463	-0.59984	-0.192938
AAGAAAAAATA	TATTTTTTCTT	-1.04558	1.33346	-0.200379	-0.520201	0.447623	-0.461167
TAATGTGTGTA	TACACACATTA	1.33278	-0.104312	0.365284	0.08549	0.291463	0.18939
AAGACAAAATC	GATTTTGTCTT	-0.062036	1.33269	0.150216	-0.078279	0.099845	-0.116695
AAAACACATTT	AAATGTGTTTT	-0.811689	1.33265	-1.13612	0.514837	-0.174934	-0.312202
AAATGTGTGTG	CACACACATTT	1.33223	-0.874811	0.272705	-0.45171	0.36638	-0.290905
AACAAATGAGT	ACTCATTTGTT	0.325942	1.33196	-0.127312	0.144519	0.339268	-0.367791
GTGACTTGTAA	TTACAAGTCAC	1.33149	-0.121188	0.487732	-0.368616	-0.032297	-0.004871
GTGGCAGAAGA	TCTTCTGCCAC	1.33132	-0.490996	-0.119114	-0.02628	-0.500972	0.559888
ACTAAATAAAA	TTTTATTTAGT	-0.311532	1.33122	-0.476511	-0.004802	-0.136859	-0.048731
CTGCTCTTTTC	GAAAAGAGCAG	1.33069	-0.34904	0.996633	-0.62023	0.201693	0.174475
AGTATATGTGG	CCACATATACT	1.3303	-0.830421	0.245174	-0.668899	0.563808	-0.369677
AGATGGGACTA	TAGTCCCATCT	1.32998	-0.582827	0.40254	-0.303404	0.440234	-0.021781
CTGGACTTAAA	TTTAAGTCCAG	1.32932	-0.227509	0.205798	-0.176335	-0.123262	0.629535
ATGATGTTGGC	GCCAACATCAT	1.3289	0.01799	0.306625	-0.111698	-0.766879	-0.62058
GCCACATTTAA	TTAAATGTGGC	-0.661979	1.32875	-0.436443	0.048574	-0.030898	0.280783
CCACAAACATC	GATGTTTGTGG	-0.568185	1.32844	-0.499979	0.695952	-0.195264	-0.095832
AATAAATAAAA	TTTTATTTATT	-0.841227	1.32789	-0.317614	0.954968	-0.096146	0.011846
TTTCCCACAAA	TTTGTGGGAAA	-1.03014	1.32698	-0.121742	-0.013633	-0.016317	0.614293
CTATTTTTTTC	GAAAAAAATAG	1.32686	-0.459605	0.105565	-0.562979	-0.378991	-0.737397
CCTTCCAAGTA	TACTTGGAAGG	-1.0037	1.32679	-0.155006	0.378721	0.158198	0.18922
CCCCAAACACA	TGTGTTTGGGG	-0.408535	1.32668	-0.909303	1.37863	-0.972939	0.409156
CCTTTGTTTTA	TAAAACAAAGG	1.32654	-0.031759	0.775132	-0.533215	0.276665	0.024502
AATTCACACAT	ATGTGTGAATT	-0.220145	1.32637	-0.80008	0.487158	-0.063493	0.56293
AAAAACAAATG	CATTTGTTTTT	-0.245544	1.32626	-0.864186	0.578593	-0.21571	-0.050639
CAAGTTTCCAC	GTGGAAACTTG	-0.493799	1.32613	-0.813925	0.186273	-0.308464	0.452688
AACACACAAAA	TTTTGTGTGTT	-0.319525	1.32603	-0.702255	0.064366	-0.066019	0.440894
AAGTTTCCACA	TGTGGAAACTT	-0.392536	1.32601	-1.16254	0.38403	-0.032618	0.68546
TATTTTAGCCA	TGGCTAAAATA	-0.260491	1.32557	0.533165	0.203872	0.081118	-0.137234
AAAGTCACTAA	TTAGTGACTTT	-0.452833	1.32546	-0.724023	0.452601	-0.552072	-0.209364
GAAACCTAAAA	TTTTAGGTTTC	-0.888293	1.3233	-0.339407	0.118845	-0.15868	-0.115081
GATGTGGAAAA	TTTTCCACATC	1.32321	0.124408	-0.180244	-0.785972	0.274372	0.392925
TTCAAATAGAA	TTCTATTTGAA	-0.045857	1.32236	0.198861	0.597301	-0.507255	0.372783
ATACAATTCAA	TTGAATTGTAT	-0.553967	1.32204	-0.407346	0.553653	-0.396839	0.186744
ATCCATAGTCC	GGACTATGGAT	-0.996227	1.32181	-0.233178	0.354372	-0.487993	0.399265
CATCTGGATTC	GAATCCAGATG	1.32178	-0.141711	0.147609	0.088953	0.146791	-0.107159
AAAGGGGGCCA	TGGCCCCCTTT	1.32016	-0.452068	-0.046851	-0.620296	0.090754	0.330648
ATCACATATAC	GTATATGTGAT	-0.974113	1.31998	-0.055634	0.358869	-0.608927	0.069714
GATTCACACAA	TTGTGTGAATC	-0.380414	1.31986	-0.639204	0.580678	-0.329469	0.671982
ATATTTTCTTC	GAAGAAAATAT	1.31982	-0.41945	0.633452	0.174362	0.034991	0.274544
GAAACACAAAC	GTTTGTGTTTC	-1.14537	1.31972	-0.842535	0.912603	-0.282095	0.583597
CCACATATACA	TGTATATGTGG	-0.943009	1.3197	-0.16617	0.450963	-0.099319	-0.138985
CCCACAAACAC	GTGTTTGTGGG	-0.249839	1.31965	-0.688663	1.14713	-0.21616	0.178809
GTATATGTGTA	TACACATATAC	1.31965	-1.02691	-0.417968	-0.429193	0.513508	-0.15808
ATGTTTGTTGG	CCAACAAACAT	1.31933	-0.170919	0.278685	-0.470312	-0.108733	-0.195805
AAAAACAAAGG	CCTTTGTTTTT	0.175658	1.31838	-0.650771	0.566551	-0.03841	0.460208
ATTGTTTTTTC	GAAAAAACAAT	1.31835	-0.91163	0.09753	-0.642835	0.026619	0.445402
AGCCAGGAGGG	CCCTCCTGGCT	1.31795	-0.190646	0.233189	0.16422	-0.307918	-0.291442
AATAATTAAAG	CTTTAATTATT	-0.338455	1.31748	0.04934	-0.036211	-0.050648	-0.162945
CACACACCATC	GATGGTGTGTG	-0.317505	1.3173	-0.306843	1.0517	0.184581	0.209521
ATGTGTTTTGA	TCAAAACACAT	1.31712	-0.586614	0.457359	-1.04746	-0.191366	0.031413
CCACATCTAGA	TCTAGATGTGG	-0.127449	1.31694	-0.536002	-0.264917	0.248045	0.440405
AAATGTCCTGC	GCAGGACATTT	-0.011229	1.31518	0.562904	0.118907	-0.366508	-0.383724
ATGGTGTGTGC	GCACACACCAT	1.31507	-0.577473	0.817469	-0.462989	0.292867	0.447613
GAAAAAATCAA	TTGATTTTTTC	-0.702056	1.3146	-0.159733	0.582619	-0.162614	-0.61293
TAAGTTTCCAA	TTGGAAACTTA	-0.518311	1.31426	-0.735934	-0.0784	-0.121285	0.363558
GCTGGACTTAA	TTAAGTCCAGC	1.31397	-0.172312	0.345015	0.162547	-0.347871	0.533161
GGAAGAAGCCA	TGGCTTCTTCC	1.31369	0.279055	-0.328916	0.126978	-0.516433	-0.343347
CTAATTTATTC	GAATAAATTAG	1.31333	-0.35265	-0.09531	-0.347546	0.469966	-0.236802
AAAAAACACAT	ATGTGTTTTTT	-0.610864	1.31324	-0.765634	0.281369	-0.887182	0.067287
CAGTCTTTCAC	GTGAAAGACTG	-0.999842	1.31303	-0.127851	0.174559	-0.029462	0.04045
CATTCCCACAA	TTGTGGGAATG	-0.615113	1.31255	-0.457002	-0.008007	0.076732	0.156045
AGAAAGTCACT	AGTGACTTTCT	-0.387355	1.31253	-0.448096	0.096967	-0.281768	-0.111459
GGCTTCTTCCC	GGGAAGAAGCC	0.325062	1.31171	-0.090828	-0.147316	0.027793	-0.588133
ACTTGAGGTCC	GGACCTCAAGT	-0.922963	1.31165	0.032643	-0.409491	-0.050385	0.180725
CAACAAACATC	GATGTTTGTTG	-0.185127	1.31163	-0.525695	0.44157	-0.470682	-0.384132
ATATATGTGAC	GTCACATATAT	1.31159	-1.00678	0.065774	-0.104344	-0.023304	-0.379787
AATCTGTGTTA	TAACACAGATT	1.31153	0.23398	0.164816	0.060389	-0.308646	-0.442699
AAATGTGTTTC	GAAACACATTT	1.31149	-0.57837	0.655942	-0.980545	0.058845	0.129681
CCATTAATATA	TATATTAATGG	-0.29554	1.31088	0.092524	0.295115	0.150506	0.23836
ACCACATATAT	ATATATGTGGT	-0.723972	1.31084	-0.83385	0.385351	-0.494654	-0.04315
ATTGTGTTTTC	GAAAACACAAT	1.31	-0.589354	1.28468	-0.713353	0.175255	-0.083488
CTTACAAGTCA	TGACTTGTAAG	-0.174711	1.30982	-0.328513	0.580407	-0.194466	0.048802
AATAAATAAAG	CTTTATTTATT	-0.429751	1.30925	-0.035721	0.516657	-0.297787	-0.263128
ACACATATACC	GGTATATGTGT	-0.857405	1.30901	-0.25362	0.148371	-0.030873	0.815979
CTGTTCACAAA	TTTGTGAACAG	-0.195283	1.30812	-0.453807	1.19421	-0.003056	-0.137872
TGGGCTTAAAA	TTTTAAGCCCA	1.3078	-0.036888	0.178209	0.120546	-0.311076	0.135647
ATACATAAAAA	TTTTTATGTAT	-0.53374	1.30757	-0.59969	0.410788	0.065332	0.689298
GCTTCTTCCAC	GTGGAAGAAGC	0.103019	1.30734	-0.155898	-0.789869	-0.354038	-0.347772
CTTTTCACACC	GGTGTGAAAAG	0.066445	1.30726	-0.272894	0.225424	-1.01839	-0.054489
AAAAACACACA	TGTGTGTTTTT	-0.741414	1.30667	-0.605646	0.794371	-0.882839	0.151434
GATGTGTTTTA	TAAAACACATC	1.30662	0.03965	0.749433	-0.706735	-0.146923	-0.104031
ACACAAATACA	TGTATTTGTGT	-0.552097	1.30638	-0.339537	0.192681	-0.796601	0.333174
CACACAGATTC	GAATCTGTGTG	-0.141137	1.30568	-0.307131	0.155625	-0.398136	0.285661
ATACAAGTCAC	GTGACTTGTAT	-0.309745	1.30533	-0.536625	0.066902	0.242677	0.346868
AGAAGTGACTA	TAGTCACTTCT	1.30531	0.010784	-0.04113	-0.682279	-0.033615	-0.454672
TATTCACACAA	TTGTGTGAATA	-0.406038	1.305	-0.776376	0.651164	-0.208396	0.464428
AATGTGTTTTA	TAAAACACATT	1.30489	-0.251576	0.929211	-0.727611	-0.503438	-0.093727
GGCTAAAATAA	TTATTTTAGCC	1.30443	-0.389955	-0.163829	0.501321	-0.402836	0.161395
AGTTTGTGGGA	TCCCACAAACT	1.3039	-0.454086	0.539901	-0.419352	0.255956	-0.108668
AGTTTCCAAAG	CTTTGGAAACT	-0.245626	1.30343	-0.462311	-0.226514	-0.081336	0.210523
ACACACAATCC	GGATTGTGTGT	-0.613261	1.30303	-0.356427	1.27732	-0.086087	0.965636
ACACATATCCT	AGGATATGTGT	-0.900456	1.30222	-0.311257	0.526526	-0.793988	0.40011
GTAGAGTCAGA	TCTGACTCTAC	-0.288373	1.30183	-0.31219	0.243445	-0.144929	-0.288817
TATAAATAAAA	TTTTATTTATA	-0.619877	1.30172	-0.948918	1.15679	-0.541421	0.018105
ATTCACACAAC	GTTGTGTGAAT	-0.699117	1.30153	-0.311437	0.510391	-0.171714	0.581466
CTTTAAGCCCA	TGGGCTTAAAG	0.089684	1.30132	-0.102465	0.305159	0.43102	0.132982
AAATGTGAATT	AATTCACATTT	1.30037	-0.187259	0.498444	-0.079414	-0.201897	-0.271143
TAACAGCAAAA	TTTTGCTGTTA	0.091657	1.29987	-0.180988	0.381371	-0.565717	0.445581
GACAAAACAAA	TTTGTTTTGTC	-0.671271	1.29946	-0.593193	0.65612	-0.119878	-0.283203
AGTATTTTCCA	TGGAAAATACT	-0.353509	1.29927	0.174296	-0.405838	0.614796	-0.278374
CAAATAATGAG	CTCATTATTTG	1.29925	0.865391	-0.561299	-0.304371	-0.458692	-0.2414
GTCTATTTGAA	TTCAAATAGAC	1.29909	-0.035748	0.547559	0.166478	0.46597	-0.24097
ACACAAACATC	GATGTTTGTGT	-1.29038	1.29865	-0.791888	0.703187	-0.491767	0.285435
CTCTGTCCATC	GATGGACAGAG	-0.93417	1.29835	-0.51934	0.441993	0.642567	-0.579795
CCCAAAACACA	TGTGTTTTGGG	-0.591778	1.29782	-1.35696	1.22971	-0.587044	-0.068784
AGAAAATATAA	TTATATTTTCT	-0.39151	1.2977	-0.052861	-0.133013	0.524919	0.55451
GTCACATATAA	TTATATGTGAC	-1.18231	1.2973	0.014841	0.358032	-0.547449	-0.011703
AAATAATATAG	CTATATTATTT	0.082963	1.29678	-0.709288	0.309165	0.568316	-0.61926
CTTTAGAGATA	TATCTCTAAAG	1.29671	-0.120172	-0.36488	-0.427475	0.125118	-0.487603
ATGGAAAATAC	GTATTTTCCAT	1.29656	-0.36515	-0.525328	0.276192	-0.292079	0.436983
AAGCACACATT	AATGTGTGCTT	-0.044509	1.29646	-0.229416	0.040925	-0.998881	0.653209
AACATAAAAGT	ACTTTTATGTT	-0.773257	1.29564	-0.786089	0.468183	-0.800399	1.21145
CCAAAACACAA	TTGTGTTTTGG	-0.85867	1.29564	-1.12768	0.99645	-0.201304	0.191744
ACAGCAATCCC	GGGATTGCTGT	0.41776	1.29538	-0.657926	0.776553	-0.490033	0.032948
GATACACAAAC	GTTTGTGTATC	-0.350939	1.29532	-1.17626	-0.054816	-0.267755	-0.219021
AAAGTGTGCCA	TGGCACACTTT	1.29525	0.134594	0.184101	-0.475444	-0.035361	0.384883
ACCTTCCAAGT	ACTTGGAAGGT	-0.398584	1.29524	0.012351	0.04218	0.185037	-0.153914
AGCACACATTA	TAATGTGTGCT	0.200862	1.29522	-0.046837	0.182906	-0.750187	0.981955
ATGTGTGTTTC	GAAACACACAT	1.2952	-1.16082	0.523735	-1.0198	-0.091885	-1.20931
AGTTTCCAAAA	TTTTGGAAACT	-0.470638	1.29486	-0.763853	0.125084	0.001107	0.094879
ATGGAAAGAAT	ATTCTTTCCAT	1.29472	0.048882	0.552985	0.178974	-0.255194	0.246095
AAGAAAATATA	TATATTTTCTT	-0.653911	1.29469	0.123016	0.39803	0.429079	0.035012
GAACACTGGAC	GTCCAGTGTTC	1.29457	-0.129051	0.039612	0.130457	0.170222	-0.192316
ATGTTTTTTGA	TCAAAAAACAT	1.29447	-0.684325	0.38956	-0.541432	-0.50351	-0.150993
CCCATGCACAA	TTGTGCATGGG	0.094905	1.29446	-0.504725	0.40116	0.406852	0.233699
GTTCAAATAGA	TCTATTTGAAC	0.092577	1.29436	0.093248	0.22249	0.014058	0.402403
TAATAATCAAA	TTTGATTATTA	0.138458	1.29428	-0.050016	-0.363328	0.302088	0.851359
AGAAAAAATAA	TTATTTTTTCT	-0.610005	1.29416	-0.22011	-0.494342	0.703558	0.023442
CAATCCAGATG	CATCTGGATTG	-0.105381	1.29408	-0.154974	0.290287	-0.196946	-0.114924
TACCTTATATA	TATATAAGGTA	-0.530735	1.29407	-0.238621	0.567795	-0.34845	-0.125334
GGAAAAAATCA	TGATTTTTTCC	-0.405968	1.29396	-0.348104	0.453981	-0.313494	-0.311793
AATCCAGATGA	TCATCTGGATT	-0.054828	1.29384	-0.026746	0.471481	-0.260296	0.543704
ATGTGGTAGAA	TTCTACCACAT	1.2933	0.002722	-0.021294	-0.603692	0.44223	-0.337017
CTAAATGTGGC	GCCACATTTAG	1.29319	-0.647145	0.06217	-0.365896	0.423259	0.147627
AGGTTTGTGTG	CACACAAACCT	1.29266	-0.521139	1.28407	-0.793201	0.856553	-0.595638
AAATAAAATAT	ATATTTTATTT	-1.08274	1.29192	-0.847339	0.834638	-0.396465	0.001196
TATTGCTGGAA	TTCCAGCAATA	1.29155	0.01557	-0.257622	0.293701	0.187049	0.050748
AAAAATGATTC	GAATCATTTTT	-0.915876	1.29072	-0.215103	0.182878	-0.053257	-0.674498
AACACATATCC	GGATATGTGTT	-0.723628	1.29065	-0.296366	0.680819	-0.620843	0.45268
ATTCTCACAAA	TTTGTGAGAAT	-0.660937	1.28986	0.335814	-0.361993	0.008292	-0.008287
CATTCTTTCCA	TGGAAAGAATG	0.025001	1.28957	0.175616	-0.378785	-0.217613	0.116878
TTCCCACAAAA	TTTTGTGGGAA	-1.37114	1.28955	0.080605	0.162601	-0.077001	0.18393
CCAACAACATA	TATGTTGTTGG	0.616881	1.28954	-0.427158	0.519638	-0.977247	0.192541
TCAATAAATGA	TCATTTATTGA	0.385341	1.28935	-0.376982	0.554189	-0.341481	0.573986
GTATTTTCCAC	GTGGAAAATAC	-0.02482	1.28905	0.169062	-0.728318	0.869478	0.137631
ACCTGGCAAAT	ATTTGCCAGGT	-0.456824	1.28875	-0.752798	-0.064594	0.321074	0.232478
GTTGTTGGAAA	TTTCCAACAAC	1.28871	-0.32553	-0.152141	0.020293	0.460776	0.135473
GAAACACAAAA	TTTTGTGTTTC	-0.284493	1.28849	-0.696032	0.650398	0.117214	0.467382
ACCTTATATAC	GTATATAAGGT	-0.536729	1.28848	0.091057	0.288705	-0.077495	-0.052043
ATGTTTTTGGG	CCCAAAAACAT	1.28821	-0.367844	0.397166	-0.398688	0.588416	-1.10343
CAAATAATGAC	GTCATTATTTG	1.28799	0.707442	-0.171944	-0.242142	-0.729533	-0.081433
AGGTCCTTTCC	GGAAAGGACCT	-0.49598	1.28767	-0.324446	-0.175542	-0.030126	0.052204
ATGTGTTTTAG	CTAAAACACAT	1.2874	-0.168945	1.48551	-0.728154	-0.226296	-0.255979
ATGGACCTGAA	TTCAGGTCCAT	1.28724	-0.206324	0.162665	-0.239277	0.734023	0.29137
AAATTTGGCTG	CAGCCAAATTT	1.28692	-0.200379	0.037412	-0.760582	0.275188	-0.019555
CAGGAAACTTC	GAAGTTTCCTG	1.28659	0.203172	-0.652507	0.060449	0.119464	-0.154631
AAATAAAACAA	TTGTTTTATTT	-0.074561	1.28624	-1.05903	-0.124846	-0.330314	0.102731
AAAAACACAAA	TTTGTGTTTTT	-0.613932	1.28623	-0.66437	0.828234	-0.236458	-0.361893
AGACACACAAA	TTTGTGTGTCT	-0.335689	1.28613	-0.842566	0.526613	0.051622	0.255239
AGTCTTTCACA	TGTGAAAGACT	-0.240436	1.28557	0.044617	0.13051	-0.158915	0.109292
GTGACTTGGAA	TTCCAAGTCAC	1.28547	-0.790177	0.239594	-0.410765	0.150978	-0.088522
AAATAATCAAA	TTTGATTATTT	0.259362	1.28545	-0.039747	0.010617	0.121022	-0.063809
CTATTTTAGCC	GGCTAAAATAG	-0.31942	1.28512	0.319341	0.179409	0.240342	0.165712
AAATAAAAGTA	TACTTTTATTT	-0.695901	1.28503	-0.774991	0.077479	-0.032292	0.780836
CAAGTCCCATC	GATGGGACTTG	-0.469485	1.28431	-0.379694	-0.018164	0.14582	0.518741
AATTTGTCTGG	CCAGACAAATT	1.28402	-0.547222	0.355574	-0.682489	-0.293246	-0.333258
GCTAAATAAAA	TTTTATTTAGC	-0.330427	1.28353	-1.13323	-0.066435	-0.291568	0.201861
CTTGTCCAGTC	GACTGGACAAG	-0.39528	1.28307	0.241046	-0.10823	0.004666	0.401116
AGGGCCTCTCC	GGAGAGGCCCT	-0.274192	1.28289	0.207985	-0.438217	0.538393	0.067857
CAATAAAATAG	CTATTTTATTG	-0.313055	1.28278	-0.956306	0.797843	-0.513053	0.557859
GAAAAAACACA	TGTGTTTTTTC	-0.556815	1.28235	-0.449265	0.043883	-0.785209	0.205338
ATTTTCCAGTG	CACTGGAAAAT	-0.059044	1.28225	0.124501	-0.022646	0.491345	-0.648436
CTTTATTTATA	TATAAATAAAG	1.28209	-0.207775	0.717772	-0.666789	-0.256877	-0.74299
ACTTTTATGTA	TACATAAAAGT	1.28199	-0.796019	0.02886	-0.637814	1.32381	-0.759009
ATCCATAGTCA	TGACTATGGAT	-0.83432	1.28199	-0.287427	0.094727	-0.294846	0.346764
GAATAAATAAA	TTTATTTATTC	-0.53636	1.28198	0.231201	0.386212	0.124119	0.110838
ATGTGGGAATG	CATTCCCACAT	1.28131	-0.450467	0.010326	-0.481639	0.071492	0.160952
CTCAAAGGTCC	GGACCTTTGAG	-0.127517	1.28109	-0.319889	-0.130324	0.237279	0.139234
AACAAACATCA	TGATGTTTGTT	-0.452989	1.28094	-0.81661	0.709923	-0.374875	-0.234561
CATTTTAGCCA	TGGCTAAAATG	-0.257714	1.28073	0.135326	0.504582	-0.187235	-0.014982
ATGTTGTTGGA	TCCAACAACAT	1.28061	0.349998	0.202152	-0.324587	0.156677	-1.06681
ATACAATTCAC	GTGAATTGTAT	-0.414645	1.28034	-0.131078	0.399788	-0.261902	0.19786
CACACATATAC	GTATATGTGTG	-1.11066	1.2803	-0.308959	-0.146582	-0.214828	0.505393
CAGAATAATTA	TAATTATTCTG	-0.143347	1.28022	-0.407244	0.672466	0.326915	-0.380179
ATTTTTATGTA	TACATAAAAAT	1.27989	-0.659196	0.333606	-0.512299	0.789669	0.00014
ACTGGACAAGA	TCTTGTCCAGT	1.27956	-0.369788	-0.175259	0.138296	0.306011	0.060513
ACCAACACCAT	ATGGTGTTGGT	-0.09243	1.27941	-0.64385	0.462857	-0.057489	-0.449791
AATTTGGCTGG	CCAGCCAAATT	1.2794	-0.18982	-0.133236	-0.897655	-0.072846	-0.325954
ACAAAACACAT	ATGTGTTTTGT	-0.637051	1.27935	-1.13018	0.470561	-0.508703	-0.194813
TCTAATTCACA	TGTGAATTAGA	0.351469	1.27914	0.098654	0.65455	-0.330648	0.295141
GGTAGTTTCAA	TTGAAACTACC	0.045342	1.27912	0.370802	0.027151	0.278144	-0.188992
CACAAAACAAA	TTTGTTTTGTG	-0.565184	1.27904	-0.571907	0.609715	-0.363547	0.121796
AATGTTTGTGG	CCACAAACATT	1.27886	-0.435411	0.802299	-0.32672	0.130294	-0.174592
CTAAATAAAAC	GTTTTATTTAG	0.216791	1.27817	-0.979655	0.085013	-0.659369	0.311574
TAGAAAAAATA	TATTTTTTCTA	-0.442479	1.27767	-0.471571	-0.767425	0.438678	0.067784
ATGGTGTGTGG	CCACACACCAT	1.27707	-0.418048	1.07707	-0.603723	0.05655	0.136506
AAAAAATCAAA	TTTGATTTTTT	-0.51545	1.27696	0.150685	0.406088	0.131337	-0.615373
AAAGAAGGAGC	GCTCCTTCTTT	1.27659	-0.193773	0.174835	0.604171	-0.437047	0.521764
GGATATGTGTA	TACACATATCC	1.27655	-0.844523	0.494972	-0.479585	0.361844	-0.498066
AGAAGGGAGGA	TCCTCCCTTCT	0.434822	1.27651	-0.378646	0.057801	-0.535178	0.922197
AAATCTGGCTG	CAGCCAGATTT	1.27616	0.529934	-0.467364	-0.354588	0.364182	0.285261
AATTAATAAAT	ATTTATTAATT	-0.69493	1.27603	-0.022827	0.946577	-0.788646	0.02895
GCACACATTAC	GTAATGTGTGC	-0.014236	1.27603	-0.146219	0.48471	0.051432	0.991757
CAGCAACACAA	TTGTGTTGCTG	-0.252304	1.276	-0.857085	0.153707	0.078738	0.439322
CTCCAACAAAC	GTTTGTTGGAG	-0.691105	1.27582	-0.761237	0.628794	-0.101327	0.032516
CTCCTTCTTTA	TAAAGAAGGAG	0.205627	1.2754	0.246444	0.330689	0.237791	-0.192021
AATAATAAATG	CATTTATTATT	0.276192	1.27523	-0.396648	0.447541	-0.587699	-0.023194
ACTAGAAAAAA	TTTTTTCTAGT	-0.74064	1.27514	0.247461	-0.499056	-0.269854	0.286452
ACATAAAAGTA	TACTTTTATGT	-0.759109	1.27511	-0.680551	-0.084394	-0.525719	1.42522
AATATTAGAAG	CTTCTAATATT	-0.071151	1.27502	-0.275999	0.076558	0.980608	-0.131143
CTATTTTCTTC	GAAGAAAATAG	1.27488	-0.037231	0.415883	-0.006811	0.03625	-0.091863
AGTAGTTTCAA	TTGAAACTACT	-0.181898	1.27483	0.222948	0.420092	0.341095	-0.104355
ACACATTTACT	AGTAAATGTGT	-0.803767	1.27454	-0.169002	-0.288508	0.755347	0.664874
AAACACAGATT	AATCTGTGTTT	-0.05897	1.27447	-0.09513	0.05615	-0.465944	0.043613
GGTATATGTGA	TCACATATACC	1.27398	-1.05593	0.228163	-0.264538	0.53682	-0.18327
AACTTCTAATA	TATTAGAAGTT	1.27378	-0.202942	0.218638	0.22366	0.233053	0.412191
ATCTTCTGCCA	TGGCAGAAGAT	-0.110189	1.27365	-0.179385	-0.42128	0.540937	0.111168
ACTTTTTTCTA	TAGAAAAAAGT	1.27357	-0.295896	-0.272262	-0.003628	0.205397	0.265077
ATTTTTTTTTC	GAAAAAAAAAT	1.27313	-0.964465	-0.072941	-0.567978	-0.644792	0.251175
AAAAAACCAAC	GTTGGTTTTTT	-0.325153	1.27304	-0.348659	0.54197	-0.369481	-0.233026
ACCAACATCAT	ATGATGTTGGT	0.274649	1.27281	-0.411417	0.424214	-0.591422	-0.908144
TAATTTATTAA	TTAATAAATTA	1.27252	-0.294486	0.241862	-0.048034	0.371418	0.195039
AAAATGGGCCA	TGGCCCATTTT	1.27133	-0.038683	0.291477	-0.579526	0.759384	0.184201
CTATTTGTGTA	TACACAAATAG	1.27119	-0.909075	-0.458631	-0.133904	0.547595	-0.040906
AATAAAAAAGT	ACTTTTTTATT	0.267612	1.27085	-0.245148	0.949009	-0.08444	1.04658
AAAACACAAAC	GTTTGTGTTTT	-1.03615	1.27043	-0.746482	0.882993	-0.1053	0.269789
AAATGTCCTGT	ACAGGACATTT	-0.183648	1.27037	0.892895	-0.125492	-0.124548	-0.65588
AAAGTTTCCAG	CTGGAAACTTT	-0.875055	1.2701	-0.648214	-0.338162	0.190802	0.349544
AGTCACATATA	TATATGTGACT	-1.01764	1.26949	-0.468483	0.116521	-0.173978	-0.039843
AATAAAATAGG	CCTATTTTATT	-0.07387	1.26919	-0.406146	0.405528	0.004823	0.170104
CAACAAAATAA	TTATTTTGTTG	-0.174973	1.26916	-0.424648	0.997356	-0.630008	0.097986
CTCTCCCCCCC	GGGGGGGAGAG	1.26898	0.148804	0.175476	0.224164	0.867652	-0.396004
ATTGGACAGAC	GTCTGTCCAAT	1.26887	-0.508159	0.017651	-0.390192	0.05873	-0.129392
ATCTTTGTGTA	TACACAAAGAT	1.26856	-0.413035	0.517872	-0.637433	0.548499	-0.698514
AATGTGACTTA	TAAGTCACATT	1.26824	0.070346	0.097184	-0.542775	-0.498617	-0.381054
ATGTTTTTGGA	TCCAAAAACAT	1.26814	-0.56172	0.341068	-0.630334	0.351	-1.02493
TCTGTCCAAAA	TTTTGGACAGA	-0.958295	1.26807	-0.420725	0.392194	0.56628	-0.286635
AATTTGTCTGA	TCAGACAAATT	1.26782	-0.28799	0.326506	-0.739087	0.013826	-0.232515
CCAAAACACAC	GTGTGTTTTGG	-0.898324	1.26746	-1.41771	1.11447	-0.326083	-0.306777
AACACATATAC	GTATATGTGTT	-0.862962	1.26745	-0.290497	-0.051877	-0.366335	0.452436
ACACACATTAA	TTAATGTGTGT	-0.194032	1.26742	-0.201862	0.663467	-0.188975	0.635064
ACTTGGATGGA	TCCATCCAAGT	1.26741	-0.949585	-0.081773	-0.493099	0.089363	-0.315589
TAAAAAATAAA	TTTATTTTTTA	-1.88652	0.666002	-0.740301	1.32778	0.24354	-0.010007
ATTTATTTTTC	GAAAAATAAAT	1.16087	-1.83341	0.656102	-0.522388	-0.079639	-0.392285
TCCTACAAAAA	TTTTTGTAGGA	-1.83195	0.628958	-0.103768	0.365977	-0.464944	0.229479
GAAAAATAAAA	TTTTATTTTTC	-1.7773	1.02894	-0.341219	1.08815	0.25753	0.370603
AAAAAATAAAT	ATTTATTTTTT	-1.76597	1.042	-0.709946	0.965286	-0.073663	-0.936775
ACACATATATC	GATATATGTGT	-1.75583	0.339936	-0.712141	-0.015021	-0.43162	0.117633
AACAGAAACAT	ATGTTTCTGTT	-1.75008	0.61656	-0.056422	0.37312	0.226765	0.219699
TCAGTCAGTCA	TGACTGACTGA	-1.74029	0.469668	0.15401	0.203483	0.811376	0.149726
GACTGACTGAC	GTCAGTCAGTC	0.19487	-1.71692	-0.080325	0.183685	0.061547	0.614402
CAACACAAACA	TGTTTGTGTTG	-1.71487	1.00686	-0.95597	1.25627	0.029064	0.656922
ATGTTTCTGTG	CACAGAAACAT	0.400955	-1.70252	-0.089621	-0.345149	1.06091	-0.240332
AATATATGTGT	ACACATATATT	0.583235	-1.69765	-0.165282	-0.493905	0.015476	-0.583872
ATATATGTGTG	CACACATATAT	0.546664	-1.6881	-0.191674	-0.500223	-0.029669	-0.441762
AAAAATAAATA	TATTTATTTTT	-1.68116	0.633051	-0.941026	0.50739	-0.599001	-1.11103
CAACAAAAACC	GGTTTTTGTTG	-1.68045	0.217661	-0.454145	1.24853	-0.11802	0.24786
CTCAGTCAGTC	GACTGACTGAG	-1.6755	0.346427	0.098886	0.042806	0.529914	-0.018538
AAAAAATAAAA	TTTTATTTTTT	-1.66555	0.887797	-0.514756	1.35513	0.554041	-0.47078
GTTTTGTAGGA	TCCTACAAAAC	0.577551	-1.6583	0.22156	-0.367929	-0.192229	-0.248995
GCAAAACAAAC	GTTTGTTTTGC	-1.64387	0.633589	-0.761318	0.636324	-0.729019	0.515091
GACTGACTGAA	TTCAGTCAGTC	0.206764	-1.63578	0.069997	0.074652	-0.129254	0.36581
ATTCTCAATAA	TTATTGAGAAT	-1.61904	0.73936	0.419308	-0.103044	-0.370498	0.155812
ATTTTTCTAGG	CCTAGAAAAAT	0.590497	-1.61053	0.12485	0.101518	0.175529	-0.232083
ATATATGTGTA	TACACATATAT	0.586014	-1.60435	-0.46306	-0.620456	-0.021554	-0.385014
ATGTTTCTGTC	GACAGAAACAT	0.242284	-1.59092	-0.086796	-0.006473	0.700629	0.10177
ATTTTGTAGGA	TCCTACAAAAT	0.467395	-1.5823	0.159187	-0.378059	-0.273694	-0.576801
ATGTTTCTGTA	TACAGAAACAT	0.509363	-1.57935	-0.233894	-0.146479	0.561141	-0.019469
CAAAACAAACA	TGTTTGTTTTG	-1.57591	0.862408	-0.503204	1.20743	-0.482482	0.38847
ATGATCCACCC	GGGTGGATCAT	-1.57533	0.722267	-0.943617	0.525008	0.432663	-0.099135
ATGTTTTTGTA	TACAAAAACAT	0.027962	-1.56952	-0.018677	-0.899864	0.680783	-0.850273
AAAATAAATAT	ATATTTATTTT	-1.56831	-0.06753	-1.14051	0.796628	-0.619738	-0.911195
ATAAAATATAA	TTATATTTTAT	-1.56613	0.876708	-0.382029	1.12596	0.518807	0.25015
CAACACAAACC	GGTTTGTGTTG	-1.56388	0.615133	-1.01743	1.53327	0.029713	0.540265
ACACACATATA	TATATGTGTGT	-1.5569	0.886529	-0.700237	-0.430461	-0.494559	0.247694
CAACAAAAACA	TGTTTTTGTTG	-1.55028	0.611382	-0.413145	0.787991	-0.237289	0.395486
AAAAATAATAG	CTATTATTTTT	-1.54476	0.584059	-0.412564	0.051471	-0.055549	0.49567
TCTGTCAGAAA	TTTCTGACAGA	-1.54459	0.148392	-0.005827	0.147099	0.014879	-0.08582
TTAAATAACAA	TTGTTATTTAA	-1.54339	-0.070071	-0.943552	0.285668	0.278116	0.430599
CTGTTTTTGTA	TACAAAAACAG	0.087609	-1.54174	-0.280807	-0.383938	0.421309	-0.627522
AGATATATGTG	CACATATATCT	-0.007975	-1.53488	-0.056786	-0.794712	0.332069	-0.05206
TTCCTACAAAA	TTTTGTAGGAA	-1.53369	0.655244	-0.27936	0.103173	-0.164976	-0.002609
ATTAAATAACA	TGTTATTTAAT	-1.5307	-0.101747	-0.695368	0.371225	0.143099	0.541396
AGACTGACTGA	TCAGTCAGTCT	0.112372	-1.52893	0.036352	0.128595	0.029286	0.789043
ATAAAAAGGAA	TTCCTTTTTAT	0.047677	-1.52737	0.07266	-0.052664	0.186527	-0.406626
ACCTACAAAAA	TTTTTGTAGGT	-1.52427	0.677225	-0.294078	0.62195	-0.193069	0.39511
AGAAAAATAAA	TTTATTTTTCT	-1.52295	1.02105	-0.66317	0.097465	-0.312201	0.590884
CAAAACAAACC	GGTTTGTTTTG	-1.5211	0.439625	-0.783073	1.29123	-0.666921	0.519713
GCAACACAAAC	GTTTGTGTTGC	-1.51838	0.760881	-1.20071	0.883189	0.07539	0.67787
GAACAAAAACC	GGTTTTTGTTC	-1.51353	-0.087631	-0.290923	0.720773	-0.337579	0.163495
ATTATTTTTTA	TAAAAAATAAT	0.817049	-1.50903	0.806124	-0.701199	0.503549	-0.157304
AAATAAATATA	TATATTTATTT	-1.50873	0.347232	-0.776986	0.942565	-0.297792	-0.435215
AAGAAGAGGAT	ATCCTCTTCTT	0.369615	-1.50829	0.848525	0.167798	-0.353239	0.054342
AAAGAAGAGGA	TCCTCTTCTTT	0.009997	-1.50214	0.104798	0.212605	-0.187859	-0.166907
ATTTTTCTAGA	TCTAGAAAAAT	0.558667	-1.49785	-0.019556	0.28922	0.318561	-0.276515
CAAAACAAGCA	TGCTTGTTTTG	-1.49761	0.269913	-0.418953	0.681933	-0.36298	1.11524
CAAAACATACA	TGTATGTTTTG	-1.49739	0.706561	-0.802146	0.752247	-0.863382	0.4604
AAATAAACATA	TATGTTTATTT	-1.49699	0.911609	-0.953092	0.333791	-0.676697	-0.457919
AATGATTGTGA	TCACAATCATT	0.618494	-1.49459	1.05824	-0.473559	0.075875	-0.363835
AAACACAAACA	TGTTTGTGTTT	-1.49411	1.24518	-0.667257	1.04148	-0.199022	0.71993
TACACATAAAA	TTTTATGTGTA	-1.49152	0.568992	-0.826268	0.819432	-0.838739	0.510142
ACCAAAAACCA	TGGTTTTTGGT	-1.49026	0.719607	-0.647854	1.03443	0.140043	0.380443
AAACAAAAACC	GGTTTTTGTTT	-1.48637	-0.051999	-0.038702	0.587808	-0.034402	-0.024225
AACAAAAACAT	ATGTTTTTGTT	-1.48576	0.464792	-0.642211	0.238919	-0.72857	0.675813
AACACATACAT	ATGTATGTGTT	-1.48537	0.737753	-0.40456	0.663975	-0.587344	0.233687
AAGAAGAGGAA	TTCCTCTTCTT	0.501776	-1.48368	0.375314	0.201754	-0.597829	-0.096221
CTAAAAAATAA	TTATTTTTTAG	-1.48208	0.638689	-0.435607	0.993672	-0.164382	0.92231
CTACAAAAACA	TGTTTTTGTAG	-1.48192	-0.109314	-0.645185	0.277064	-0.405382	0.54935
AATAAAATATA	TATATTTTATT	-1.4804	1.1391	-0.789395	1.26293	0.122581	0.228759
TACAAAAACAA	TTGTTTTTGTA	-1.47803	-0.289995	-0.584482	-0.079455	-0.85792	0.440554
CCTGCAAAAAA	TTTTTTGCAGG	-1.47612	1.13708	-0.469676	0.429722	0.293505	0.83313
CCAAAACAAAC	GTTTGTTTTGG	-1.47532	0.711847	-0.910413	1.02154	-0.60804	0.606215
ATGATCCACCG	CGGTGGATCAT	-1.47171	0.412831	-0.86072	0.28834	-0.043247	-0.023042
TGAAAAATAAA	TTTATTTTTCA	-1.46947	0.490176	-0.553419	0.614758	-0.539988	1.11098
CAAGCCAAACA	TGTTTGGCTTG	-1.46944	-0.08179	-0.673799	0.415042	-0.265441	0.364414
TATTAGTTCAA	TTGAACTAATA	-1.46813	0.108419	-0.617091	-0.279028	0.374417	0.706617
ATCCTACAAAA	TTTTGTAGGAT	-1.46801	0.510256	-0.358228	0.039318	-0.368644	-0.20789
AACAGAAACAC	GTGTTTCTGTT	-1.46611	0.739274	-0.048064	0.703801	0.360469	0.026308
ACAGAAACATC	GATGTTTCTGT	-1.46606	0.361317	-0.127583	0.169894	-0.006307	0.613949
AAAACAAGCAC	GTGCTTGTTTT	-1.46501	0.419094	-0.621247	0.574095	-0.05319	0.871323
TCTGTAAAAAA	TTTTTTACAGA	-1.46393	1.13961	-0.305972	-0.265738	-0.654179	-0.16604
CCTACAAAAAC	GTTTTTGTAGG	-1.46276	0.252441	-0.269773	0.758566	-0.300646	0.6185
CAACACATACA	TGTATGTGTTG	-1.46201	0.794604	-0.560081	1.21007	-0.337726	0.751823
GATATATGTGC	GCACATATATC	0.471342	-1.45965	0.28237	-0.423821	0.529416	-0.251707
GGACTGACTGA	TCAGTCAGTCC	0.565019	-1.4586	0.15697	-0.024683	0.206951	0.644414
AAAATAAATAC	GTATTTATTTT	-1.45829	-0.084871	-0.700228	0.448035	-0.609954	-0.75382
AACAAAAACAG	CTGTTTTTGTT	-1.45798	0.524438	-0.126285	-0.023211	-0.505819	0.416339
AATGATCCACC	GGTGGATCATT	-1.45732	0.384528	-0.805992	0.395024	0.200138	-0.140803
CCACACATATA	TATATGTGTGG	-1.45588	0.88543	-0.700098	0.096374	-0.378751	0.477557
ATGTTTATTTA	TAAATAAACAT	0.797901	-1.45341	0.29465	-0.871617	-0.274035	-0.224631
CTTTTGTAGGA	TCCTACAAAAG	0.527599	-1.45256	-0.102264	-0.430812	-0.172624	-0.33653
AAAAAATAATA	TATTATTTTTT	-1.45233	0.75849	-0.497108	0.124668	0.013455	0.264879
CACTGGGAGAA	TTCTCCCAGTG	-0.009948	-1.4505	-0.356873	-0.232533	-0.200593	0.074743
CACATATATCA	TGATATATGTG	-1.45029	0.489617	-0.892	0.10888	-0.37357	0.461619
ATCTGTAAAAA	TTTTTACAGAT	-1.44807	0.909998	-0.479237	0.076315	-0.763383	-0.257473
CCAACACAAAC	GTTTGTGTTGG	-1.44713	0.6215	-1.15048	1.1033	-0.034334	0.787483
CACTGGGAGAG	CTCTCCCAGTG	0.195775	-1.44699	-0.513379	-0.178695	-0.275357	0.228758
ATTAGTTCAAT	ATTGAACTAAT	-1.44591	0.188742	-0.407515	-0.16288	0.503176	0.317512
TCCTAGAAAAA	TTTTTCTAGGA	-1.44328	0.382467	-0.766659	0.451392	-0.58175	0.078038
CAAGAAGAGGA	TCCTCTTCTTG	0.392755	-1.44139	0.423942	0.042889	-0.042058	0.055749
AACACATATAT	ATATATGTGTT	-1.4404	0.533811	-0.48176	-0.09697	-0.593269	-0.082626
CAATAAATATA	TATATTTATTG	-1.43805	0.654275	-0.553251	0.809458	-0.000189	-0.161982
GTTATTTTTTA	TAAAAAATAAC	0.403549	-1.43617	1.12321	-0.297904	0.770475	0.191053
TATTAGTACAA	TTGTACTAATA	-1.43578	0.088559	-0.760976	0.073194	0.106845	0.374599
ATTTTTGTAGG	CCTACAAAAAT	0.416415	-1.43387	0.433425	0.203303	0.572139	-0.183874
CGAAAAATAAA	TTTATTTTTCG	-1.43339	0.628481	-0.281367	0.460788	-0.31085	0.845354
ACAAAACAAAC	GTTTGTTTTGT	-1.43264	1.21541	-0.797936	1.03643	-0.696984	-0.058647
TAAAACATAAA	TTTATGTTTTA	-1.43252	0.365935	-0.557005	1.31354	0.126064	0.213007
TAAAAATGTTA	TAACATTTTTA	-1.42996	0.370831	0.015884	-0.61274	0.033084	0.262553
CAAAAATAATA	TATTATTTTTG	-1.42796	-0.029644	-0.14022	0.063538	-0.073662	0.140009
AAGTTCTGGTG	CACCAGAACTT	-1.42286	0.113452	-0.106608	-0.248638	0.217899	-0.279913
CAGTCAGTCAG	CTGACTGACTG	-1.42257	0.469232	0.208753	0.200718	0.46653	0.024006
AAACAAGCACA	TGTGCTTGTTT	-1.42242	0.749641	-0.581637	0.522349	-0.204648	0.595615
AAAAATGTCAG	CTGACATTTTT	-1.42151	-0.150172	0.43036	-0.11121	0.26053	0.860732
CAGGGAAGGCA	TGCCTTCCCTG	-1.41944	0.101944	-0.245198	0.290704	-0.869272	0.50886
ATTTATTTTTG	CAAAAATAAAT	0.848287	-1.41937	0.80512	-0.188148	-0.486341	-0.782067
ATGTGTGGAAT	ATTCCACACAT	0.293814	-1.4192	0.054934	-0.884279	0.007896	0.108078
ATTGTTTTTTA	TAAAAAACAAT	0.758909	-1.4189	0.5114	-0.589021	0.306689	0.344389
CACAGAAACAC	GTGTTTCTGTG	-1.41856	0.523669	-0.336791	0.24106	-0.106628	0.867517
ATTTATGTTTC	GAAACATAAAT	0.690268	-1.41814	0.61679	-0.556776	0.495084	-0.563247
AAAACATAAAT	ATTTATGTTTT	-1.41526	0.330474	-0.701723	0.910039	-0.289141	0.207942
AACAGAAACAG	CTGTTTCTGTT	-1.41308	0.686648	0.132038	0.219606	0.441259	-0.210924
CACTGACTGAC	GTCAGTCAGTG	0.095166	-1.41294	-0.009008	0.284332	-0.16624	0.282896
AATATGTGTGT	ACACACATATT	0.736985	-1.41246	-0.689893	-0.939865	0.45368	-0.597197
ACACATTTCAA	TTGAAATGTGT	-1.41159	0.931334	-0.480057	0.864886	-0.443595	0.8395
ATAAAAAATAA	TTATTTTTTAT	-1.40934	0.326978	-0.515744	1.24546	0.083508	0.532709
GTTTGTGTTGA	TCAACACAAAC	0.456436	-1.40925	1.02775	-1.17009	0.521851	0.129004
ATTAGTACAAT	ATTGTACTAAT	-1.40868	0.103146	-0.456936	-0.139052	0.529694	0.397577
AACAAAAACCT	AGGTTTTTGTT	-1.40848	0.134115	-0.407209	1.17033	-0.27158	0.228735
CAACACAAACG	CGTTTGTGTTG	-1.40769	0.534392	-1.07026	1.18613	-0.051494	0.404583
CAACAGAAACA	TGTTTCTGTTG	-1.40569	0.656647	0.082612	0.846372	0.719071	-0.208144
CCCTACAAAAA	TTTTTGTAGGG	-1.40543	0.207497	-0.258602	0.405911	-0.324527	0.100275
CCTAGAAAAAA	TTTTTTCTAGG	-1.405	1.22567	-0.248324	-0.119372	-0.344575	0.306461
AACAGACACAT	ATGTGTCTGTT	-1.40456	0.383327	-0.77572	0.056519	-0.651846	-0.420477
ATTTATGTTTG	CAAACATAAAT	0.595888	-1.40334	0.835157	-0.329241	0.377875	-0.926301
TATTATCTAAA	TTTAGATAATA	-1.40235	-0.492665	0.230791	-0.234244	-0.968961	-0.365033
AGTTTGTGTTG	CAACACAAACT	0.53167	-1.4023	0.980112	-1.06555	0.563733	-0.016942
CTTCAGTCAGA	TCTGACTGAAG	-1.40158	0.070989	0.128911	-0.341098	-0.364558	-0.557844
AATATATGTGC	GCACATATATT	0.714642	-1.40148	0.132108	-0.205585	0.427259	-0.403958
CCTGTAAAAAA	TTTTTTACAGG	-1.4014	0.818609	-0.897608	-0.280221	-0.238989	-0.013775
AACACAAACAC	GTGTTTGTGTT	-1.40135	1.17227	-0.488712	0.691864	-0.401463	0.584612
TCCAAAAATCA	TGATTTTTGGA	-1.40107	0.024573	-0.233037	0.567288	0.149867	0.499393
ACTGACTGACT	AGTCAGTCAGT	0.194434	-1.3992	-0.083089	0.238428	-0.064173	0.269556
ATTTTTATTGA	TCAATAAAAAT	0.094458	-1.39904	0.609975	-0.57777	-0.254396	-0.819838
CATGATCCACC	GGTGGATCATG	-1.39889	0.50833	-1.00851	0.457608	0.045014	0.073145
ACAAAAACAGT	ACTGTTTTTGT	-1.39872	0.29113	-0.301117	0.167492	-0.46081	0.184464
CGACTGACTGA	TCAGTCAGTCG	0.24821	-1.39857	0.04412	0.187045	0.053323	0.564548
ACTGACTGAAG	CTTCAGTCAGT	0.154034	-1.39821	-0.029318	0.051449	-0.552587	-0.201825
ATGACTGACTG	CAGTCAGTCAT	0.802681	-1.39766	0.433289	0.019268	0.292616	0.811318
GGATATTTGGA	TCCAAATATCC	-0.08223	-1.39692	0.652653	-0.517496	-0.492524	-0.846686
AAAAATAATAC	GTATTATTTTT	-1.39674	0.320649	-0.319834	0.087628	-0.14649	0.342129
ATATGTGTGGA	TCCACACATAT	0.753948	-1.39651	0.353613	-1.1554	0.666917	-0.239653
ATATTTATTGA	TCAATAAATAT	0.694482	-1.39486	0.772522	-0.433966	0.308835	0.099417
GTCAGTCAGTA	TACTGACTGAC	-1.39413	0.300848	0.126958	0.07873	0.344677	-0.462151
GTGATGGTTTA	TAAACCATCAC	-0.031225	-1.3934	0.305179	-0.704891	0.21278	-0.454986
AACAAAAACAA	TTGTTTTTGTT	-1.39323	0.146725	-0.326585	0.178009	-0.73567	0.435259
AATTCTCCATA	TATGGAGAATT	-1.392	0.473825	0.62841	-0.463976	-0.058264	-0.961259
ACCAGAACTTC	GAAGTTCTGGT	-0.076231	-1.3919	-0.457954	-0.216243	-0.153678	0.171818
GTAAAAAATAA	TTATTTTTTAC	-1.39187	0.751976	-0.68819	0.890282	-0.225677	0.492341
ATTGTGGATTA	TAATCCACAAT	0.214894	-1.39187	0.462402	-0.655319	1.08459	-0.599914
AAATAAATACC	GGTATTTATTT	-1.39159	-0.123103	-0.182093	1.10462	-0.412819	0.033196
ATAATCCACAA	TTGTGGATTAT	-1.39119	0.121664	-0.609037	0.266647	-0.729939	0.671675
AAATCAATAGC	GCTATTGATTT	-1.39107	0.530793	0.020104	0.222334	-0.012111	0.201183
CACCAGAACTC	GAGTTCTGGTG	0.033979	-1.3888	-0.617036	-0.025306	-0.393953	0.249168
AACTTTTGAAA	TTTCAAAAGTT	-0.558198	-1.38832	0.510439	0.2637	-0.197352	-0.402377
GGAACAAAAAC	GTTTTTGTTCC	-1.3881	0.017386	-0.223506	0.639498	-0.306728	0.166006
GCAAAATAAAC	GTTTATTTTGC	-1.38593	1.04556	-0.975688	0.698089	-0.44745	0.16615
GATGATTGTGA	TCACAATCATC	0.475967	-1.38577	0.989851	-0.415672	-0.070268	-0.685169
GAACAAAAACA	TGTTTTTGTTC	-1.38323	0.305863	-0.249801	0.259844	-0.457012	0.311058
CCTACAAAAAA	TTTTTTGTAGG	-1.38294	0.910605	0.025244	0.571797	-0.263001	0.850185
TATGTGTGGAA	TTCCACACATA	0.524457	-1.38162	0.251071	-1.08629	0.280973	0.065511
TTAAAAAACAA	TTGTTTTTTAA	-1.37742	0.332636	-0.440544	0.753932	0.574114	0.473118
ACTGACTGAGG	CCTCAGTCAGT	0.295126	-1.37739	0.133441	0.019043	-0.236644	0.013846
ATTAGCACAAT	ATTGTGCTAAT	-1.37705	0.135711	-0.827748	0.117866	0.072495	0.025856
GTGCTTGTTTA	TAAACAAGCAC	0.599581	-1.37544	0.412302	-0.778561	0.369588	0.197585
CTCTGACTGAA	TTCAGTCAGAG	-0.171228	-1.37458	-0.21543	0.311537	-0.379574	-0.610844
CTGTTATTTAA	TTAAATAACAG	-0.333346	-1.37441	0.086569	-0.828638	0.591216	0.357983
ACACACATATC	GATATGTGTGT	-1.37436	0.781204	-0.837374	-0.159481	-0.396883	0.601283
ACCTAGAAAAA	TTTTTCTAGGT	-1.37327	0.570854	-0.67641	0.253215	-0.191925	0.257442
ATCAATAAAAA	TTTTTATTGAT	-1.37174	-0.161315	-1.25731	0.91924	-0.629123	0.404489
GTACAAAAACA	TGTTTTTGTAC	-1.37168	-0.116814	-0.696187	-0.125239	-0.49938	0.329276
CACTGACTGAG	CTCAGTCAGTG	0.246723	-1.37152	0.114123	0.199532	-0.246325	0.198408
AAACAAAACCC	GGGTTTTGTTT	-1.36872	-0.086934	0.052702	0.635848	-0.355551	0.634756
GGAAAAATAAA	TTTATTTTTCC	-1.3679	0.741503	-0.194294	0.451723	-0.232025	0.748215
AACAAAAACCC	GGGTTTTTGTT	-1.36699	0.160136	-0.337349	1.02612	-0.444038	0.475525
GAAGAAGAGGA	TCCTCTTCTTC	0.12893	-1.36682	0.370178	0.008974	-0.281518	-0.151613
CAAAAATAAAA	TTTTATTTTTG	-1.36631	0.718654	-0.009437	1.23607	-0.129385	-0.033107
AAACAAAAACA	TGTTTTTGTTT	-1.36605	0.340883	0.002319	0.131042	-0.15375	0.122928
ATTCCCATCAC	GTGATGGGAAT	-1.36596	0.578761	-0.749998	0.411635	0.047752	0.247057
CACAGAAACAG	CTGTTTCTGTG	-1.36553	0.471042	-0.156689	-0.243135	-0.025838	0.630285
TCCTGCAAAAA	TTTTTGCAGGA	-1.3639	0.618526	-0.574524	0.259155	0.213374	0.569804
AAAAATAATAA	TTATTATTTTT	-1.36287	0.509909	-0.56639	0.244889	-0.339621	0.10317
ATCCAACAAAA	TTTTGTTGGAT	-1.36249	0.889396	-0.37007	-0.048196	-0.619151	-0.025007
CAATAAAGACA	TGTCTTTATTG	-1.36184	0.556414	-0.504668	0.405906	-0.470212	-0.183917
ATAAGCACAAT	ATTGTGCTTAT	-1.36113	0.452493	-0.641395	0.423664	-0.642537	0.236907
ATATATGTGTC	GACACATATAT	0.19653	-1.36047	-0.228099	-0.250911	0.1441	-0.518093
AACACACACAT	ATGTGTGTGTT	-1.35967	0.953132	-0.901899	0.588075	-0.609405	0.573071
AGTTCTGGATG	CATCCAGAACT	-0.101778	-1.35953	0.294997	-0.269272	-0.033954	-0.215649
GTTTTTATTGA	TCAATAAAAAC	-0.06708	-1.35932	0.714184	-0.720898	-0.0464	-0.805066
GCAAAACAGAC	GTCTGTTTTGC	-1.35791	0.582051	-0.257494	0.064386	-0.614408	0.170572
AAGGTTCACAC	GTGTGAACCTT	-1.35698	0.456442	-0.344021	-0.007239	-0.173907	0.246892
GCAACAAAAAC	GTTTTTGTTGC	-1.35679	0.607358	-0.478287	1.07288	-0.342301	0.294779
AAAGTAAACAT	ATGTTTACTTT	-1.35623	1.09815	-0.679049	0.365387	0.361009	0.381852
TTCAGTCAGAA	TTCTGACTGAA	-1.35445	0.138997	0.248257	-0.339349	-0.488735	-0.772588
AAATGGTATTA	TAATACCATTT	0.121312	-1.35294	0.531421	-0.013692	-0.187777	0.043358
CTCAGTCAGTA	TACTGACTGAG	-1.35271	0.452406	0.042158	0.201861	0.260189	-0.542237
AATATAAATAT	ATATTTATATT	-1.35215	-0.235436	-0.291419	0.361525	-0.005078	-0.495572
GGGAACAAAAA	TTTTTGTTCCC	-1.35159	0.154885	-0.156585	0.477681	-0.287836	-0.34181
AAAAGTCAGTT	AACTGACTTTT	-1.35125	0.46752	0.257445	0.620323	0.112247	0.479259
GCAAAACATAC	GTATGTTTTGC	-1.35123	0.397318	-0.565246	0.603126	-1.00822	0.657817
ATTTATGTTTA	TAAACATAAAT	0.32296	-1.35122	0.50039	-0.805191	0.424021	-0.772608
AAGAAGAGGAG	CTCCTCTTCTT	-0.012393	-1.35062	0.359711	0.146514	-0.144341	0.142443
ACCTACAAAAC	GTTTTGTAGGT	-1.35061	0.625818	-0.558239	0.477534	0.02288	-0.026598
ATCCAGAACTA	TAGTTCTGGAT	-1.35048	-0.47766	-0.229707	0.175353	0.022769	0.094676
AACAGATACAT	ATGTATCTGTT	-1.34889	0.226453	-0.321297	0.421013	0.361082	-0.324699
CTACACAAACA	TGTTTGTGTAG	-1.34812	1.00189	-0.779322	0.601122	-0.330952	0.172832
ATTATTGAGAA	TTCTCAATAAT	0.654768	-1.34798	-0.109486	0.133671	0.203389	-0.343006
TGCAAAACAAA	TTTGTTTTGCA	-1.34703	0.267837	-0.582426	0.126306	-0.420022	0.468532
CCTGGGAACCC	GGGTTCCCAGG	0.444725	-1.34604	-0.081564	0.035067	-0.014063	-0.064845
CATTTTTCTAG	CTAGAAAAATG	0.466023	-1.34579	-0.009596	0.975738	0.218119	0.126431
AACAAACACAT	ATGTGTTTGTT	-1.3456	0.573331	-0.835509	0.444303	-0.760583	0.820309
AACTGAACTAA	TTAGTTCAGTT	0.640803	-1.34459	-0.395124	-0.086331	-0.34289	0.115054
GAAAAATAAAC	GTTTATTTTTC	-1.34452	0.418296	-0.421943	0.904358	0.19702	0.492821
ATTATATTTGA	TCAAATATAAT	0.546585	-1.34414	0.749171	-0.345926	-0.003937	-0.659778
CTCCTACAAAA	TTTTGTAGGAG	-1.34401	0.548439	-0.283064	0.107246	-0.437844	-0.04977
CAATCAATAGC	GCTATTGATTG	-1.34391	0.55527	-0.320368	0.437091	-0.074935	0.004754
GGTGGATCATA	TATGATCCACC	0.296421	-1.34383	0.2975	-0.744972	-0.042658	0.197263
AAACACAAACC	GGTTTGTGTTT	-1.34311	0.853456	-0.728713	1.31848	-0.198373	0.603273
TCCTACACAAA	TTTGTGTAGGA	-1.34302	0.498893	-0.348614	0.788461	-0.546628	0.732604
CATTCCTATAA	TTATAGGAATG	-1.34257	-0.268647	-0.069118	0.763664	0.121683	-0.010767
ATGTATATGTG	CACATATACAT	0.783798	-1.34246	0.213218	0.466047	-0.712437	0.038345
CGGAACAAAAA	TTTTTGTTCCG	-1.3419	-0.070767	-0.143565	0.532731	-0.153429	-0.02773
TATTCTCAATA	TATTGAGAATA	-1.34124	0.25957	0.376573	-0.072531	0.055644	0.184381
ACAGAGACTGA	TCAGTCTCTGT	0.230237	-1.34105	0.151115	-0.143986	-0.022289	0.49556
CAACTGAACTA	TAGTTCAGTTG	0.187526	-1.34102	-0.320555	-0.182475	-0.387365	0.013296
AAACATAAATG	CATTTATGTTT	-1.34044	0.739897	-0.824482	0.685138	-0.683827	0.648215
ATTATATTTTA	TAAAATATAAT	0.92243	-1.33939	1.02096	-0.449845	0.572262	0.546579
GTTACAAGAAA	TTTCTTGTAAC	-1.33874	0.24444	-0.106848	0.362627	0.416827	-0.055917
AATTAAATAAC	GTTATTTAATT	-1.33841	0.099635	-0.574866	0.634983	-0.222216	0.097721
ATGGAAGTGTG	CACACTTCCAT	0.412773	-1.33838	0.293537	-0.617145	-0.355676	0.140902
GAAACATAAAA	TTTTATGTTTC	-1.33806	0.990079	-0.334095	0.744367	-0.187106	0.410648
GGATTTTTGTA	TACAAAAATCC	0.290411	-1.33711	0.704818	-0.489486	-0.050121	-0.189823
GTTTTTGTTGA	TCAACAAAAAC	0.254462	-1.33698	1.17379	-0.518376	0.308226	-0.347081
ATGGTCTAGGG	CCCTAGACCAT	0.229824	-1.33648	0.72185	-0.150735	0.341444	0.014871
ACCTGCAAAAA	TTTTTGCAGGT	-1.33619	0.667156	-0.482742	0.358029	0.352205	0.764401
AAACAGTAGCT	AGCTACTGTTT	-1.33609	0.252497	0.22468	0.518296	-0.565058	0.120191
GAGAAGACAGC	GCTGTCTTCTC	0.361081	-1.3358	0.004069	0.077429	0.402574	-0.246418
ATAAAACATAA	TTATGTTTTAT	-1.33516	0.720715	-0.430293	0.970391	-0.031877	0.214371
CGGGTTCCCAG	CTGGGAACCCG	-1.33503	0.476763	-0.227803	0.085926	-0.096625	-0.039382
AAAACATAAAA	TTTTATGTTTT	-1.33419	0.629816	-0.478686	1.03684	0.086935	0.123413
ACAACACAAAC	GTTTGTGTTGT	-1.33384	0.631367	-0.961262	1.23165	0.075521	0.440211
AAACTGAACTA	TAGTTCAGTTT	0.327925	-1.33342	-0.073221	-0.147619	-0.234012	0.591775
CCTACACAAAC	GTTTGTGTAGG	-1.33266	0.474269	-0.558846	1.05054	-0.390954	0.662166
CCAACACATAC	GTATGTGTTGG	-1.33224	0.540909	-0.634297	1.23217	-0.125171	1.00819
ACAAAATAAAC	GTTTATTTTGT	-1.33197	1.2194	-0.716975	1.27965	-0.639088	-0.169552
ATGATTGTGAG	CTCACAATCAT	0.25588	-1.33186	1.00144	0.048132	0.268157	-0.521977
CACTGACTGAA	TTCAGTCAGTG	0.107061	-1.3318	0.141313	0.175298	-0.357041	0.034304
AAACACATACA	TGTATGTGTTT	-1.33172	0.834584	-0.345629	0.952645	-0.575928	0.910632
CACACATATAG	CTATATGTGTG	-1.33136	0.997291	-0.372187	-0.361694	-0.501691	0.320138
CTCTGGGAGAA	TTCTCCCAGAG	0.065551	-1.33007	0.043666	0.03445	-0.53463	-0.252414
ATGATCCACCA	TGGTGGATCAT	-1.32986	0.483119	-0.939631	0.210575	-0.239454	0.137763
CAAAATAAATA	TATTTATTTTG	-1.32918	0.562293	-1.18229	0.612584	-0.598109	-1.24819
AAAGACTGACT	AGTCAGTCTTT	0.202531	-1.32911	0.533985	0.022674	0.44335	0.196629
GAACTTGGAAA	TTTCCAAGTTC	0.27215	-1.32847	0.295774	-0.519527	0.072015	-0.554223
AGTTCTGGTGA	TCACCAGAACT	-1.32822	0.052111	0.092478	-0.686435	-0.04491	-0.312352
GCACTGGGAGA	TCTCCCAGTGC	-0.210735	-1.32799	-0.245743	-0.161898	-0.512666	0.227855
GAACTTTTGAA	TTCAAAAGTTC	-0.306091	-1.32764	0.461989	0.169549	-0.05669	-0.109913
GAGAAGACAGA	TCTGTCTTCTC	0.452622	-1.32699	0.189051	0.04523	0.336158	-0.077183
CCAGAGACTGA	TCAGTCTCTGG	0.052879	-1.32551	0.211337	-0.504492	0.151243	0.324839
CCCAGAACTTC	GAAGTTCTGGG	-0.386048	-1.32533	-0.43496	0.21338	-0.148233	0.105022
ATAATCCACAC	GTGTGGATTAT	-1.32461	0.164967	-0.643197	0.324833	-0.668204	0.252894
ACCTATTAAAA	TTTTAATAGGT	-1.32393	0.395086	-0.247005	-0.003036	-0.16028	0.257492
CTAAAAAACAA	TTGTTTTTTAG	-1.32378	0.535546	-0.87913	0.714571	0.373522	0.509364
CAGAGACTGAC	GTCAGTCTCTG	0.247545	-1.32361	0.221922	-0.049962	0.024931	0.474071
CAAACATAAAA	TTTTATGTTTG	-1.32326	0.895699	-0.106561	0.962734	-0.55016	0.293438
GTGTGAACCTA	TAGGTTCACAC	0.521681	-1.32319	0.076236	-0.209034	0.149907	-0.168462
GTCTGACTGAA	TTCAGTCAGAC	0.071788	-1.32249	-0.452999	-0.050186	-0.162613	-0.209446
AAAAATAAATC	GATTTATTTTT	-1.32239	1.10929	-0.58426	0.262442	-0.477112	-0.582017
ATCCCACAAAA	TTTTGTGGGAT	-1.32216	0.856543	-0.028625	0.109056	-0.084062	-0.043453
GGAACAAAAAA	TTTTTTGTTCC	-1.32163	0.342282	-0.234694	0.769312	-0.108206	0.168469
AGAGAGACTGG	CCAGTCTCTCT	0.17431	-1.32144	0.579619	-0.144894	0.212796	0.114461
CGGTGGCTCAA	TTGAGCCACCG	0.526182	-1.32089	0.234068	-0.694396	-0.065528	-0.571365
CTCCAGAACTA	TAGTTCTGGAG	-1.32051	-0.591651	-0.337	-0.213928	0.005951	-0.083247
GTGTTTGTGTA	TACACAAACAC	1.24178	-1.32034	0.193293	-0.571328	0.161588	-0.605645
CAATAAAGATA	TATCTTTATTG	-1.32003	0.831844	-0.431243	0.129617	0.125912	-0.733547
CCAGTGACTGA	TCAGTCACTGG	0.179339	-1.31987	-0.237198	-0.735072	0.145518	0.395597
CCAGCCCCTCC	GGAGGGGCTGG	-1.319	0.962926	0.209504	0.276536	0.472452	-0.397702
ATTTTTGCAGG	CCTGCAAAAAT	0.420771	-1.31847	0.463928	-0.385588	0.855541	0.218467
GCTGGGAACCC	GGGTTCCCAGC	0.448905	-1.31834	0.009238	-0.213957	-0.115395	-0.145288
CCAGTCAGTCA	TGACTGACTGG	-1.31801	0.76214	0.038969	0.223528	0.828551	-0.077993
AAAGTTCACAG	CTGTGAACTTT	-1.3161	0.431827	-0.737997	0.289782	-0.056123	0.585461
ACCACACTTAT	ATAAGTGTGGT	-1.31516	0.541688	-0.157488	0.049189	0.185974	0.014663
TAATAAACATA	TATGTTTATTA	-1.31459	0.830179	-0.406392	0.643972	-0.611574	0.239185
CCATAATCCAC	GTGGATTATGG	-1.31428	0.259896	-0.268603	0.819491	-0.040394	0.550587
CACACATATAA	TTATATGTGTG	-1.3142	0.876627	-0.445642	-0.234123	-0.490251	0.097489
CACTATGCTGA	TCAGCATAGTG	-0.033861	-1.31414	-0.152475	-0.259096	0.398053	0.244596
CTTCTCAATAA	TTATTGAGAAG	-1.31368	0.852197	0.269978	0.082581	-0.369269	0.310808
AAGCCAAACAC	GTGTTTGGCTT	-1.31335	-0.130765	-0.630637	0.37447	-0.258078	0.40844
AACAAAAACCG	CGGTTTTTGTT	-1.31333	-0.026337	-0.393966	0.710796	-0.163419	0.195773
TACTGACTGAA	TTCAGTCAGTA	0.312743	-1.31299	0.229052	0.017924	-0.652953	0.096085
CAATAAATACC	GGTATTTATTG	-1.31295	0.025049	-0.426032	1.34155	0.196298	0.327403
TCAAATATAAA	TTTATATTTGA	-1.31295	0.721242	0.098552	1.12421	-0.779836	-0.20484
CCAAACCTATA	TATAGGTTTGG	-1.3127	0.254573	-0.680528	0.543101	-0.121349	0.45597
GTGTTTTTGTA	TACAAAAACAC	0.262159	-1.31218	-0.130019	-0.587417	0.635885	-0.527083
AAACACTTCCA	TGGAAGTGTTT	-1.31194	0.708191	-0.693314	0.527545	0.202188	0.663099
AATAAAGATAT	ATATCTTTATT	-1.3118	0.55395	-0.705736	0.010593	-0.03954	-0.980575
GCAACACATAC	GTATGTGTTGC	-1.31173	0.565249	-0.640441	1.04006	-0.098111	0.73097
ATATCTGACAG	CTGTCAGATAT	-0.26406	-1.31151	0.284996	0.134024	-0.133454	0.013903
AATATGTGTGG	CCACACATATT	0.735886	-1.31144	-0.163058	-0.939727	0.683543	-0.48139
ATGTGTCTGTA	TACAGACACAT	0.451646	-1.3114	-0.060852	-0.669633	-0.019329	-0.767074
GAAAAATAATA	TATTATTTTTC	-1.31079	0.349454	0.048565	-0.013324	-0.115702	0.626519
AAAAAACAATA	TATTGTTTTTT	-1.31045	0.599473	-0.416574	0.267662	0.002355	0.131917
ACACATATATA	TATATATGTGT	-1.31027	0.696189	-0.296228	-0.120944	-0.196972	-0.563114
GGGTGGATCAA	TTGATCCACCC	0.747236	-1.30973	0.403843	-0.709453	-0.212232	0.158863
CAGAGTCTCAC	GTGAGACTCTG	-1.30973	0.029255	-0.309689	0.007296	-0.100587	0.541916
AAAAATAAATT	AATTTATTTTT	-1.30962	1.15283	-0.849705	0.746964	-0.276298	-0.580601
AAGTCAGGCAT	ATGCCTGACTT	-1.30953	0.807448	-1.10751	-0.526873	-0.109821	1.00252
AGAAGTTCTGG	CCAGAACTTCT	-1.30945	-0.31578	0.15164	-0.550604	0.137997	-0.18021
CCAAAACATAC	GTATGTTTTGG	-1.30935	0.570841	-0.974462	0.707429	-0.818345	0.980017
CTACAAAAATC	GATTTTTGTAG	-1.30854	0.21119	0.025153	0.345247	0.256904	0.337782
ATTCCACACAA	TTGTGTGGAAT	-1.30828	0.29617	-0.724986	0.370777	-0.180728	0.02395
AACATATACAT	ATGTATATGTT	-1.30791	0.394803	0.458144	0.130556	0.134283	-0.4933
CAAGTCAGGCA	TGCCTGACTTG	-1.30782	0.584771	-0.788139	-0.446622	0.236285	0.815898
CGGTGGCTCAC	GTGAGCCACCG	0.484225	-1.30777	0.480645	-0.499924	-0.130681	-0.843814
AATTAGTTCAA	TTGAACTAATT	-1.30747	0.320628	-0.541085	-0.322826	0.687159	0.012925
CATAATCCACA	TGTGGATTATG	-1.30721	0.189008	-0.548155	0.317992	-0.410485	0.321549
GACAGAAACAC	GTGTTTCTGTC	-1.30695	0.364998	0.001885	0.243885	0.235474	0.507238
ATATTTATTTC	GAAATAAATAT	0.007851	-1.30575	1.00861	-0.804085	-0.48249	-0.896792
TGAAAAGTAAA	TTTACTTTTCA	-1.30464	0.189171	-0.503733	0.725389	-0.305955	0.428393
CCAGTCTCTCA	TGAGAGACTGG	-1.30442	0.564753	-0.278486	0.390746	0.114826	0.391216
AAATGGTGTGA	TCACACCATTT	0.376543	-1.30379	0.762121	-0.088961	-0.374226	-0.306327
AAACCATCACA	TGTGATGGTTT	-1.30219	0.426538	-0.475653	0.135271	-0.470613	0.258316
CATTAGTTCAA	TTGAACTAATG	-1.30174	0.32443	-0.221709	-0.182151	0.352864	0.269485
CAGGTTCACAC	GTGTGAACCTG	-1.30131	0.432263	-0.335386	0.187715	-0.01642	0.617892
TTACAAGAAAA	TTTTCTTGTAA	-1.3004	0.271004	-0.132023	-0.086279	0.407372	0.08617
AATCAATAGCA	TGCTATTGATT	-1.30038	0.325609	0.342392	0.643833	0.202173	0.024978
AAGACTGACTG	CAGTCAGTCTT	0.047136	-1.29962	0.179352	0.043777	0.122661	0.662961
GCACACATATA	TATATGTGTGC	-1.29924	0.619482	-0.521315	0.04187	-0.331111	0.601991
ATGTTTTTTTC	GAAAAAAACAT	0.787685	-1.29896	0.172579	-0.342987	-0.680694	-0.972582
AAATAAATATC	GATATTTATTT	-1.29853	0.103215	-0.520867	1.24912	-0.530148	-0.190593
ATTCCAAGTTC	GAACTTGGAAT	-1.29836	0.063729	-0.178039	0.064597	-0.402246	-0.05988
CTAGAAAAATA	TATTTTTCTAG	-1.2983	0.681657	0.310928	-0.36686	0.281601	0.275219
TAATCCACACA	TGTGTGGATTA	-1.29829	0.403415	-1.29557	0.459544	-0.691103	0.182643
AAATAAATATT	AATATTTATTT	-1.29802	-0.041152	-0.817433	0.962146	-0.511531	-0.530216
AATGGTTGTGA	TCACAACCATT	0.58677	-1.29777	0.916861	-0.358663	-0.07863	0.090892
TAATAAATATA	TATATTTATTA	-1.29748	0.791525	-0.277383	0.933566	-0.133253	0.145068
TAAAAAAGCAA	TTGCTTTTTTA	-1.29747	0.674686	-0.603176	0.375843	-0.346753	0.07286
AAACAAACACA	TGTGTTTGTTT	-1.29732	0.807343	-0.229917	-0.045411	-0.19667	0.608275
AAATCCACACA	TGTGTGGATTT	-1.29701	0.494182	-1.27263	0.664077	-0.571707	0.127574
AAAATAAACAT	ATGTTTATTTT	-1.29619	0.858393	-0.991357	0.883813	0.041623	-0.241553
AAAAATAAAAT	ATTTTATTTTT	-1.2961	0.876497	-0.450423	1.08414	0.164955	-0.205571
CAACCCAAACA	TGTTTGGGTTG	-1.29579	0.497967	-0.523556	0.716183	-0.497743	0.126012
AAGTCCAAAGC	GCTTTGGACTT	-1.2956	0.63243	-0.514472	0.637606	-0.601788	0.18228
GTGTTTCTGTA	TACAGAAACAC	0.632077	-1.29538	0.096787	-0.138121	0.36775	0.114235
AGGAACAAAAA	TTTTTGTTCCT	-1.29507	-0.292269	-0.197413	0.455643	-0.254177	0.196434
ACAATAAATAT	ATATTTATTGT	-1.29504	0.269648	-0.706084	0.983168	-0.222288	-0.112112
ATCTGTCAGAA	TTCTGACAGAT	-1.29482	-0.086107	0.277633	-0.046045	-0.323795	-0.491589
GGTTTTTGTTA	TAACAAAAACC	-0.106159	-1.29425	0.902959	-0.467357	0.362923	-0.264771
CACACATTTCA	TGAAATGTGTG	-1.29383	1.03591	-0.405239	0.907804	0.142031	0.959858
GAATGGTGTGA	TCACACCATTC	0.261053	-1.29353	0.771798	-0.347677	-0.137056	-0.263842
GAAGGAGCTGC	GCAGCTCCTTC	0.229031	-1.29347	0.039355	-0.450037	0.301873	0.612432
TCTAGAAAAAA	TTTTTTCTAGA	-1.29337	1.19475	-0.060807	-0.263867	-0.389264	0.449721
CACATATATCC	GGATATATGTG	-1.29204	0.57307	-0.876721	0.169028	-0.535241	0.320204
ATTTTAATAGG	CCTATTAAAAT	0.376555	-1.2919	-0.06638	-0.400499	0.238197	-0.416021
ATGTTTTTTTA	TAAAAAAACAT	0.342802	-1.29138	-0.276757	-0.508364	-0.531153	-0.604178
AAAACATACAT	ATGTATGTTTT	-1.29097	0.797519	-0.678057	0.125256	-0.83304	0.283963
AAGCCAAACAT	ATGTTTGGCTT	-1.29065	-0.019983	-0.58059	0.578525	-0.504138	0.538893
CACCAAAAACC	GGTTTTTGGTG	-1.29055	0.738304	-0.837103	0.986873	-0.23344	0.479656
CAAAACCATTC	GAATGGTTTTG	-1.28975	0.309628	-0.649395	0.501886	-0.436551	0.453359
GAAAAGTAAAC	GTTTACTTTTC	-1.28972	0.36325	-0.909834	0.740826	0.297372	0.155037
ATCAGTCAGTC	GACTGACTGAT	-1.28967	0.310311	0.397363	0.367335	0.315725	-0.043191
AAGTCCAAAGA	TCTTTGGACTT	-1.28956	0.422123	-0.156416	0.33808	-0.478241	0.247363
AGAATTCTCAG	CTGAGAATTCT	-1.28912	0.143215	0.199865	0.365692	-0.029142	-0.346737
ATTTATGTGTA	TACACATAAAT	0.371392	-1.28856	0.79434	-0.691955	0.242184	-0.934976
CCCTGCAAAAA	TTTTTGCAGGG	-1.28833	0.591448	-0.519324	0.370328	0.291174	0.351769
GAAATCCACAC	GTGTGGATTTC	-1.28772	0.437213	-0.762954	0.549098	-0.48019	-0.022154
ATGTTTTTATA	TATAAAAACAT	0.307167	-1.2874	-0.331858	-0.339723	-0.512059	-0.500106
AATATAAACAT	ATGTTTATATT	-1.28728	0.680834	-0.848885	0.136326	-0.159679	-0.09359
AACAGAAACAA	TTGTTTCTGTT	-1.28696	0.101811	0.016302	0.470569	0.23596	0.093101
AAACACTAGCA	TGCTAGTGTTT	-1.28646	0.256868	-0.077969	0.550094	-0.659099	0.106061
CCTGCAAAAAC	GTTTTTGCAGG	-1.28615	0.431774	-0.420589	0.611835	0.247268	0.831237
ATAAAAAGGAC	GTCCTTTTTAT	0.472701	-1.28454	-0.019031	0.127065	0.038953	-0.529847
TATAAGTTCAA	TTGAACTTATA	-1.28382	0.191963	-0.632421	0.221796	0.069709	1.08231
ATATTTTATTC	GAATAAAATAT	1.02072	-1.28331	1.16518	-0.981053	0.368579	-0.324861
AGATGGCCAGA	TCTGGCCATCT	0.271456	-1.28326	-0.232643	-0.127923	-0.00639	-0.305685
AAAACAAACAC	GTGTTTGTTTT	-1.2826	0.724296	-0.075486	0.531151	-0.009199	0.309862
ATGTTTGTGTC	GACACAAACAT	1.04194	-1.28252	0.690421	-0.251554	0.535877	-0.522151
CCCTGTAGCAG	CTGCTACAGGG	-1.28249	0.068926	-0.151201	-0.148786	-0.06503	0.314799
AGTTTGGCTTG	CAAGCCAAACT	-0.250201	-1.28187	0.397307	-0.570163	-0.090545	-0.080156
AATAATCCACA	TGTGGATTATT	-1.28175	-0.02864	-0.541939	0.159851	-0.402323	0.421018
CAAAATAAACA	TGTTTATTTTG	-1.28171	0.972408	-0.700369	1.15353	0.043224	0.218138
AAATTGTGTGT	ACACACAATTT	0.900156	-1.28155	0.966007	-0.106726	-0.188728	-0.550562
CAAAACCTATA	TATAGGTTTTG	-1.28148	0.768613	-0.50665	0.343827	0.138286	-0.234423
CCAACAAAAAC	GTTTTTGTTGG	-1.28101	0.786818	-0.191506	0.886339	-0.489625	0.532394
ATCTATAAAAA	TTTTTATAGAT	-1.28083	0.647154	-0.496681	0.178731	-0.195883	0.208615
AAAAAATAAAC	GTTTATTTTTT	-1.28068	0.304884	-0.610241	1.21172	0.511308	-0.368525
ACAGAAACATG	CATGTTTCTGT	-1.28032	0.517502	0.00249	-0.315428	0.019034	0.450369
ATTTTTACAGA	TCTGTAAAAAT	0.587825	-1.28012	-0.312216	-0.241889	0.152459	-0.92898
CAAAGTAAACA	TGTTTACTTTG	-1.2794	1.2058	-0.867497	0.635945	0.276434	0.615176
AACTGAACTAT	ATAGTTCAGTT	0.525956	-1.27924	-0.352872	-0.097473	-0.306371	-0.184782
AAAAATGTCAC	GTGACATTTTT	-1.27921	0.189464	0.122802	-0.095311	0.133402	1.12404
CCTATTACCAG	CTGGTAATAGG	-1.27769	-0.078465	-0.0593	0.312998	-0.124386	0.234996
CATTAGCTCAA	TTGAGCTAATG	-1.27753	0.234233	-0.344674	-0.208774	-0.157392	0.468442
AGGGAAGGCAC	GTGCCTTCCCT	-1.27729	0.416234	-0.15534	0.141688	-0.424051	0.322941
GTTTGTTTTGA	TCAAAACAAAC	0.335257	-1.27691	0.982528	-0.786235	0.579667	-0.222396
GTATTTATTGA	TCAATAAATAC	0.518251	-1.27689	0.793967	-0.461356	0.487185	0.420716
AAAGCCAAACA	TGTTTGGCTTT	-1.27678	0.204474	-0.639605	0.326831	-0.423295	0.58487
AAGTCCAAAGT	ACTTTGGACTT	-1.27657	0.61364	-0.543267	0.516795	-0.422075	0.162348
CAGGCAGTCAA	TTGACTGCCTG	-1.27613	0.124573	-0.458262	0.070572	0.195982	0.441214
GAAAAGTAAAA	TTTTACTTTTC	-1.27601	0.288334	-0.457634	0.955468	0.351193	0.273524
GCATAACAAAC	GTTTGTTATGC	-1.27574	0.048747	-0.335387	0.210029	0.028621	0.174558
GGATGGCCAGA	TCTGGCCATCC	0.343218	-1.2753	0.068449	-0.234116	-0.177273	0.431228
AAATAAACATT	AATGTTTATTT	-1.27501	0.89785	-0.939491	0.790863	-0.244041	-0.092183
ATATATGTGCA	TGCACATATAT	0.502279	-1.27499	0.025734	-0.159632	0.461722	-0.076975
ATATTGAGAAT	ATTCTCAATAT	0.204877	-1.27477	-0.002205	0.575105	-0.049535	0.169726
ACCTACAAAAT	ATTTTGTAGGT	-1.27462	0.515662	-0.568369	0.415161	-0.304927	-0.108063
TGATGTGCACA	TGTGCACATCA	-0.181969	-1.27455	0.125281	-0.097186	-0.278287	0.550215
ACATATACATG	CATGTATATGT	-1.27446	0.202801	0.58808	0.049537	0.389156	-0.626276
CATTCCAAACA	TGTTTGGAATG	-1.27438	-0.005923	-0.262939	0.034113	-0.077734	0.192953
TAAGCCAAACA	TGTTTGGCTTA	-1.27422	-0.003195	-0.483771	0.27539	-0.436688	0.409863
ACCTGCAGAAA	TTTCTGCAGGT	-1.27412	0.138737	0.110205	-0.034715	0.226827	0.228455
CTGTCAGAAAG	CTTTCTGACAG	-1.27378	0.507218	0.077781	-0.164026	0.352403	0.114807
CTCTGTCAGAA	TTCTGACAGAG	-1.27372	-0.095383	0.112995	0.158392	-0.164447	-0.169458
GAAGAGGAGGA	TCCTCCTCTTC	0.117537	-1.27337	-0.269624	0.157982	-0.329332	0.449488
CCACACATATC	GATATGTGTGG	-1.27334	0.780105	-0.837236	0.367353	-0.281075	0.831146
TCCTGCAGAAA	TTTCTGCAGGA	-1.27134	0.212618	0.232805	0.115502	0.050396	0.407851
ACTGACTGACA	TGTCAGTCAGT	0.233106	-1.27127	-0.183136	0.205997	-0.232194	0.437276
AAATATAAATA	TATTTATATTT	-1.27125	0.23326	-0.090006	0.608783	0.113778	-0.516233
TAAACATAAAA	TTTTATGTTTA	-1.27114	0.622771	-0.582511	0.627966	-0.396467	0.339584
TAATGGAATGA	TCATTCCATTA	0.04707	-1.27076	0.603595	-0.332816	0.121274	-0.494815
CTCAGTCAGAG	CTCTGACTGAG	-1.26983	-0.061265	0.304363	-0.018629	-0.859857	-0.18498
AACCAAAAACC	GGTTTTTGGTT	-1.26949	0.463305	-0.6738	0.875944	-0.185691	0.260252
TAATAAAGATA	TATCTTTATTA	-1.26941	0.858668	-0.471751	0.225627	0.421907	-0.325505
CTTCAGTCAGC	GCTGACTGAAG	-1.26917	-0.079917	-0.083842	-0.139553	-0.49751	-0.467107
CTGTTTTCTAA	TTAGAAAACAG	-0.050078	-1.26908	0.476225	-0.227468	-0.46339	0.370469
AGTTTTTGTTG	CAACAAAAACT	0.0633	-1.26897	0.863196	-0.66363	0.238702	-0.227274
AAACAAAACCT	AGGTTTTGTTT	-1.26887	-0.346089	-0.109303	0.641842	-0.491286	0.089566
AAATTGTGTGG	CCACACAATTT	0.569032	-1.26792	0.986634	-0.30655	-0.410978	-0.550979
CCACATATATC	GATATATGTGG	-1.26792	0.987928	-0.991992	0.116209	-0.28748	0.156561
ACACATATATG	CATATATGTGT	-1.26791	0.22642	-0.619278	-0.089209	-0.47699	-0.067366
CTTCCTCCTCA	TGAGGAGGAAG	-1.26769	0.429059	-0.33779	-0.101755	0.324667	0.013111
AATACCATTTC	GAAATGGTATT	-1.26747	0.033508	0.259312	0.372007	-0.139518	0.03317
TCTGGCCATCA	TGATGGCCAGA	-1.26737	0.406079	-0.197377	0.048803	0.243908	-0.718538
ATCACAATCAT	ATGATTGTGAT	-1.26728	0.418772	-0.329452	0.85584	-0.593295	0.591647
AAAGTCAACAG	CTGTTGACTTT	-1.26682	0.882674	-0.651405	0.6594	0.009597	0.29478
ATTCTCAATAC	GTATTGAGAAT	-1.26677	0.362015	0.475987	-0.369686	-0.1139	0.096836
AAGCCAAACAG	CTGTTTGGCTT	-1.26643	-0.223748	-0.559521	0.418932	-0.417207	0.773745
GCCTGCAAAAA	TTTTTGCAGGC	-1.26623	0.493086	-0.390284	0.264152	0.429262	0.765903
CACACATTTCC	GGAAATGTGTG	-1.26581	1.04919	-0.357377	0.675979	0.127244	0.583702
GAACTGAACTA	TAGTTCAGTTC	0.560112	-1.26518	0.12924	-0.195729	-0.095995	0.130938
CTCAGTAAGAA	TTCTTACTGAG	-1.26514	-0.209961	0.032876	0.035531	-0.720155	0.004684
AAAAGTTCACA	TGTGAACTTTT	-1.26482	0.413812	-1.24859	0.133164	-0.001554	0.658305
AAACAGTTCCA	TGGAACTGTTT	-1.26452	0.31795	-0.438782	0.421195	-0.205405	0.355307
GTTCTGGATGA	TCATCCAGAAC	0.462675	-1.26437	0.347886	-0.140154	-0.145908	-0.832848
AAAACAAACAT	ATGTTTGTTTT	-1.26414	0.957432	-0.567834	0.568967	-0.520916	0.107349
GAGTTCAGGTA	TACCTGAACTC	-1.26409	0.331435	-0.120155	-0.883156	0.415473	0.49285
ATTCCCAATAA	TTATTGGGAAT	-1.26385	0.547908	-0.19151	0.362285	-0.728966	0.128227
GACTATGCTGA	TCAGCATAGTC	0.142105	-1.26325	-0.041464	-0.264561	0.35055	0.26444
TAACAGAAACA	TGTTTCTGTTA	-1.26317	0.51574	0.137668	0.532759	0.373495	0.093246
ATTTATTTTTA	TAAAAATAAAT	1.0647	-1.26214	0.690003	-0.863077	-0.134574	-0.345952
ACAAACACCTG	CAGGTGTTTGT	-1.26205	0.099901	-0.216054	0.878498	0.243487	-0.121064
GAATCAATAGC	GCTATTGATTC	-1.26197	0.586103	0.159599	0.174888	0.366905	0.239331
AACACTTCCAT	ATGGAAGTGTT	-1.26183	0.57234	-0.93997	0.538267	0.236698	0.090621
CATTAGTACAA	TTGTACTAATG	-1.26181	0.348858	-0.463973	0.171916	0.197621	0.295108
ATGTTTTTGTC	GACAAAAACAT	0.094899	-1.26176	0.115613	-0.560712	0.841645	-1.1221
AAAAACAAGCA	TGCTTGTTTTT	-1.26171	-0.015044	-0.754221	0.540118	-0.220215	0.97182
CAATAAAAATA	TATTTTTATTG	-1.26151	0.359478	-0.396648	0.205195	-0.206159	-1.07512
AGCAAAACACA	TGTGTTTTGCT	-1.26142	0.371272	-0.526718	0.299792	-0.037292	-0.248426
TAAAAATAATA	TATTATTTTTA	-1.26137	0.472543	-0.078191	0.180422	0.0291	0.314711
CCAGAGTCTCA	TGAGACTCTGG	-1.26116	0.216105	-0.15215	0.136859	0.367201	0.498668
CTGTAAAAAAA	TTTTTTTACAG	-1.2611	0.890357	-0.539043	-0.621729	-0.198897	-0.286908
GTTTTTGTAGA	TCTACAAAAAC	0.167208	-1.26107	0.679847	-0.561553	0.579123	-0.012601
TATAATCCACA	TGTGGATTATA	-1.26092	0.068166	-0.315232	0.279322	-0.611496	0.451371
CATTAAATAAC	GTTATTTAATG	-1.26079	0.307155	-0.610738	0.568477	-0.364536	0.523718
TCAGTCTTTCA	TGAAAGACTGA	-1.26062	1.03698	0.188559	0.403474	0.086842	0.354391
TCAGGTTCCCA	TGGGAACCTGA	-1.26059	0.373182	-0.846641	-0.035029	-0.24511	0.126828
ACCACAAACCA	TGGTTTGTGGT	-1.26054	0.602905	-0.554286	1.03355	0.373338	0.223525
ATTAAATCCAC	GTGGATTTAAT	-1.26045	0.346253	0.349762	0.456037	0.256558	0.413036
TTAAAAAGGAA	TTCCTTTTTAA	0.110269	-1.26028	-0.378445	-0.290619	0.027468	-0.241771
TTAAAAAATAA	TTATTTTTTAA	-1.2599	0.465719	-0.683218	1.25365	0.291404	0.406137
TAAAGGAATAA	TTATTCCTTTA	-0.343088	-1.25947	0.523579	0.005689	-0.830915	-0.232033
CAAGTCCAAAG	CTTTGGACTTG	-1.25946	0.528509	-0.143513	0.817987	-0.663199	0.495585
ATATTTGTGTC	GACACAAATAT	0.777345	-1.25919	0.080251	-0.274894	0.714807	-0.570014
GAAGAGGATGA	TCATCCTCTTC	0.870128	-1.25878	0.397271	-0.018851	-0.317967	-0.007764
CAAACCATTCC	GGAATGGTTTG	-1.25829	0.23131	-0.427567	0.097035	-0.450225	0.154334
CAAACCATTCA	TGAATGGTTTG	-1.25786	0.061397	-0.606902	0.22404	-0.588999	0.002052
ACATAGCCAAA	TTTGGCTATGT	-1.25734	0.24447	-0.170054	0.009269	-0.395519	0.016111
CAAAGGAATAA	TTATTCCTTTG	0.109371	-1.25715	0.25186	0.347928	-0.928548	-0.294393
CCAGTCTTTCA	TGAAAGACTGG	-1.25691	0.912248	-0.319232	0.315936	0.09342	-0.001693
CATTCTCAATA	TATTGAGAATG	-1.25689	0.304099	0.802455	0.120909	0.259598	-0.044849
TAAGATATACA	TGTATATCTTA	-1.25682	-0.390523	-0.242379	-0.256563	0.270278	0.144495
GATGATCCACC	GGTGGATCATC	-1.2566	0.443326	-0.876151	0.312516	0.19288	-0.147407
ATATTTATTTA	TAAATAAATAT	0.193461	-1.25599	0.768895	-0.625144	-0.762322	-0.403976
CAGGAGATGGG	CCCATCTCCTG	0.457685	-1.25533	-0.024002	-0.214818	-0.536573	-0.545472
CTTCTCCCAGA	TCTGGGAGAAG	-1.25532	0.346238	-0.045693	0.083497	-0.22215	0.049027
AGGATTGTGTG	CACACAATCCT	0.868439	-0.757634	1.72746	-0.390375	0.937905	-0.530387
TCTCAAATAAA	TTTATTTGAGA	0.550744	0.489158	0.001424	1.66599	-0.435109	0.109042
AAGGATTGTGT	ACACAATCCTT	0.646991	-0.842239	1.64365	-0.237895	0.379599	-0.760048
ATTTATTGTGG	CCACAATAAAT	0.47225	-0.182909	1.62813	-0.852958	0.211293	-0.35117
AAAATAAAGTT	AACTTTATTTT	-0.469236	0.598994	-0.840289	1.6242	-0.378019	0.285112
ACACAATCTTC	GAAGATTGTGT	-0.89876	0.296258	-0.356118	1.61061	-0.531236	0.095152
ACTTTATTTTG	CAAAATAAAGT	0.378833	-0.572205	1.60391	-0.779518	0.360016	-0.686069
CCACACAATCC	GGATTGTGTGG	-0.786562	0.763687	-0.545913	1.60185	-0.116695	0.645914
CCCACACAATC	GATTGTGTGGG	-0.998138	0.392009	-0.834621	1.59615	-0.314649	0.044476
ACTTTATTTTA	TAAAATAAAGT	0.758261	-0.382579	1.59406	-0.479019	0.604104	-0.387172
AATTTATTGTG	CACAATAAATT	0.51876	-0.395437	1.58347	-0.997292	0.306473	0.028678
AACACAAACCT	AGGTTTGTGTT	-1.01567	0.890952	-0.61158	1.55877	-0.378323	0.61468
ACATTATTTTG	CAAAATAATGT	0.362999	0.485173	1.55657	0.194186	-0.115904	-0.953076
CTAAAACACAG	CTGTGTTTTAG	-0.230146	0.937393	-0.809116	1.55632	-0.234564	-0.083912
CCTCAAATACA	TGTATTTGAGG	0.314659	0.540277	-0.551064	1.54207	-0.925118	0.764691
AAGATTGTGTG	CACACAATCTT	0.224727	-0.976333	1.54146	-0.419859	0.078402	-0.376016
TCTAAAACACA	TGTGTTTTAGA	-0.272345	0.923305	-0.855566	1.53946	-0.435235	-0.012978
CAACACATACC	GGTATGTGTTG	-1.21087	0.39985	-0.635892	1.53654	-0.347146	0.819265
AAAATAAAGTG	CACTTTATTTT	-0.289685	0.332842	-0.349574	1.5321	-0.287201	0.446052
CCAACATAAAC	GTTTATGTTGG	-0.70245	0.988387	-0.573091	1.52325	-0.669022	0.538912
ATACACAATTG	CAATTGTGTAT	-0.798861	0.31539	0.047605	1.52102	0.031402	0.327458
ATTTCTTTGTG	CACAAAGAAAT	0.358953	0.074917	1.4984	0.117614	0.108712	-1.48449
AACACACACCT	AGGTGTGTGTT	-0.665443	0.344743	-0.959573	1.49633	-0.426695	-0.114173
ACATTAACCTA	TAGGTTAATGT	-0.132625	0.348966	-0.056195	1.4952	-0.669549	0.003715
AAAGATTGTGT	ACACAATCTTT	0.547808	-1.1741	1.49316	-0.393558	-0.088694	-0.349524
ACACAATCCTG	CAGGATTGTGT	-0.454486	0.298808	-0.035266	1.49258	-0.927101	0.325592
AGATTGTGTGG	CCACACAATCT	0.337665	-0.913035	1.4843	-0.530549	0.076873	-0.082829
ACACTCACCTG	CAGGTGAGTGT	-0.17865	-0.268838	-0.412547	1.4827	-0.403203	-0.398833
ACAATTGTGTA	TACACAATTGT	0.225969	-0.693454	1.47803	-0.154691	0.275727	-0.223793
ATTTATTTGTG	CACAAATAAAT	0.594755	-0.672606	1.47591	0.010012	0.026473	-1.06086
AATAAATACCT	AGGTATTTATT	-1.04577	-0.185448	-0.181565	1.47448	0.018086	-0.002619
ATTGTGTGGGG	CCCCACACAAT	0.459107	-0.968621	1.46747	-0.969021	0.19413	-0.340398
CTAAAATACAG	CTGTATTTTAG	0.593688	0.630621	-0.493529	1.46684	-0.090452	0.633553
AAAAATAAAGT	ACTTTATTTTT	-0.572813	0.759902	-0.562956	1.46676	-0.509614	0.457091
AACACAATCCT	AGGATTGTGTT	-0.948339	0.470771	-0.282319	1.46375	-0.830178	0.705919
ACACTCACCTC	GAGGTGAGTGT	-0.239759	-0.162156	-0.814468	1.46246	-0.518647	-0.120635
CTCAAATAAAA	TTTTATTTGAG	0.099197	0.33183	-0.371088	1.4525	-0.648362	0.108347
CCTCAAATAAA	TTTATTTGAGG	0.234292	0.29829	-0.378642	1.44989	-0.41151	0.330295
CCCACATTAAA	TTTAATGTGGG	-0.098092	0.824769	-0.521564	1.44902	-0.171732	-0.144985
AAAAGCACATA	TATGTGCTTTT	0.027365	0.358228	-0.253556	1.44853	-1.04229	0.52948
CCCAACATAAA	TTTATGTTGGG	-0.39342	0.862142	-0.535424	1.4478	-0.982088	0.36317
ACAAAATAATG	CATTATTTTGT	0.452067	0.665814	-0.327347	1.44758	-0.82822	-0.33928
AAGATTGTGTA	TACACAATCTT	0.225376	-0.518212	1.44471	-0.392239	-0.225443	-0.544932
CAATTTTCTCC	GGAGAAAATTG	0.186887	0.677336	0.242186	1.44463	0.018655	0.112148
GCAATTGTGTA	TACACAATTGC	0.458452	-0.884055	1.44424	-0.005827	0.39766	-0.205653
ATTTATTTGAG	CTCAAATAAAT	0.38833	0.31739	1.44229	-0.367498	0.498165	-0.29487
ACCACAAACAC	GTGTTTGTGGT	-0.457986	1.21953	-0.9394	1.44061	0.008175	-0.042906
AAGAAGATTGA	TCAATCTTCTT	0.455831	-0.482167	1.44017	-0.174078	0.413281	-0.363065
AAGCAGATTGT	ACAATCTGCTT	-0.067702	-0.38601	1.43823	-0.136421	-0.057634	0.272706
ATCTCAAATAA	TTATTTGAGAT	0.676348	0.124664	0.412874	1.43296	-0.118597	-0.063898
CCCACATTAAC	GTTAATGTGGG	0.51772	0.684212	-0.287546	1.43222	-0.117287	-0.142342
AACACAAACCC	GGGTTTGTGTT	-0.998942	0.685939	-0.652726	1.43162	-0.539334	0.602413
ATTATTTTGTA	TACAAAATAAT	0.907585	-0.338529	1.42694	-0.377069	-0.096867	-0.299613
AAAACACAATG	CATTGTGTTTT	-0.932589	1.0682	-0.321897	1.42507	-0.58263	0.112311
AATAAATTCCT	AGGAATTTATT	-0.518506	0.317991	-0.251342	1.42433	-0.137095	0.512603
CAATTGTGTAC	GTACACAATTG	0.432126	-0.701436	1.42416	0.019708	0.193306	-0.266832
CCCACACACAC	GTGTGTGTGGG	-0.093978	0.860427	-0.943264	1.42399	-0.423613	0.469374
CCCCCACACAA	TTGTGTGGGGG	-0.26835	0.898726	-0.798899	1.42311	-0.23506	0.353183
CAGGTGAGTGG	CCACTCACCTG	-0.162332	0.112739	1.42037	-0.381883	-0.265585	-0.332182
ACACAATCCTC	GAGGATTGTGT	-0.8593	0.50537	-0.357351	1.41998	-0.766223	0.279868
ACACAATCTTA	TAAGATTGTGT	-0.74853	0.177861	-0.412851	1.41998	-0.731524	-0.024728
ACACAATCCTA	TAGGATTGTGT	-0.80995	0.350511	-0.507	1.41939	-0.956786	0.519656
ATTTAATGGAG	CTCCATTAAAT	0.162269	-0.271467	1.41742	-1.04029	0.658893	-0.090965
CCACAATAAAG	CTTTATTGTGG	-0.206411	0.539792	-0.80355	1.41656	-0.52602	0.416859
ACAACATAAAC	GTTTATGTTGT	-0.532982	0.86137	-0.576323	1.41434	-0.440517	0.397548
ACAAACAAATG	CATTTGTTTGT	-0.430615	0.457039	-0.410917	1.41115	-0.609128	0.236256
CTGTGTGACTA	TAGTCACACAG	0.690944	-0.476949	1.41017	-0.786891	-0.077585	-0.490852
CTCAAATAAAC	GTTTATTTGAG	0.138507	0.830511	-0.586958	1.40959	-0.379752	0.569881
AAGAAGATTGT	ACAATCTTCTT	0.462196	-0.239042	1.40871	-0.223605	0.267085	-0.162858
GATTGTGTGGA	TCCACACAATC	0.196916	-0.881913	1.40805	-0.467414	0.221656	-0.431317
CCCCACACACA	TGTGTGTGGGG	-0.019206	1.08569	-0.721366	1.40774	-0.574164	0.5383
AAAATATCATT	AATGATATTTT	-0.719716	0.373047	-0.979685	1.40722	0.002712	0.331836
TCCACATTAAA	TTTAATGTGGA	-0.374311	0.88346	-0.867314	1.4062	-0.338683	0.071141
TCTAAAATAAA	TTTATTTTAGA	0.062089	0.143177	-0.13208	1.40384	-0.206052	0.538324
AGGTTAATGTG	CACATTAACCT	0.571004	0.056583	1.40368	-0.372063	0.203777	-0.264601
CTAAAATATAG	CTATATTTTAG	-0.655783	0.08451	0.141699	1.40188	0.145156	0.353221
CCCAAAATAAA	TTTATTTTGGG	-0.518646	0.440099	-0.588484	1.40136	-0.62981	-0.206541
CCACTCACCTC	GAGGTGAGTGG	0.05163	-0.055649	-0.783805	1.40014	-0.447625	0.012614
ACCACATTAAA	TTTAATGTGGT	-0.16375	0.864733	-0.637616	1.39921	-0.345264	-0.222182
AAATAAAAAAT	ATTTTTTATTT	-0.33097	0.916512	-0.554074	1.39875	-0.344627	0.115093
TACAAAATAAA	TTTATTTTGTA	-1.01198	0.964945	-0.592561	1.39871	-0.528891	-0.33803
TCCAAAATAAA	TTTATTTTGGA	-0.813459	0.610751	-0.610312	1.39725	-0.779983	-0.01768
ACAAATAAATA	TATTTATTTGT	-0.839784	0.228845	-0.144235	1.39542	-0.409773	-0.401775
CTAAAACACAC	GTGTGTTTTAG	-0.634944	1.18483	-0.839755	1.39364	-0.671314	-0.183381
CCACCCACCTC	GAGGTGGGTGG	0.318297	-0.175814	-0.602737	1.3926	-0.241866	-0.421122
AAGGTTTGTGT	ACACAAACCTT	0.988699	-0.637405	1.39241	-0.436697	0.439449	-0.589343
AAACTTTATTT	AAATAAAGTTT	0.38548	-0.442554	1.39239	-0.802738	0.298119	-0.088012
ACACAATAAAT	ATTTATTGTGT	-0.356222	0.321103	-0.865936	1.39186	-0.091959	0.246756
AGGATTGTGTA	TACACAATCCT	0.520703	-0.718711	1.3911	-0.320256	0.408061	-0.901542
CAACAGTAAAG	CTTTACTGTTG	-0.252125	0.46997	-0.607864	1.39	-0.719694	0.534049
CCCACACACAA	TTGTGTGTGGG	-0.19518	1.19171	-0.583305	1.38981	-0.284765	0.725227
GTTAATGTGGA	TCCACATTAAC	0.742903	0.2415	1.38941	-0.633296	0.073784	-0.284238
ACATTATTTTC	GAAAATAATGT	0.360078	0.349841	1.38885	0.546804	-0.224131	-0.673526
AAAACACAATT	AATTGTGTTTT	-0.987177	1.14885	-0.785104	1.3857	-0.209733	0.560592
CTAAAATAAAG	CTTTATTTTAG	-0.07563	0.721629	-0.334628	1.38556	-0.054394	0.855795
AAACCCAGCAG	CTGCTGGGTTT	0.345946	-0.503084	-0.313238	1.38519	0.232384	0.261981
GTTAGTGTGGA	TCCACACTAAC	0.105474	-0.353663	1.3832	-0.183393	-0.131512	-0.136277
CTCAAATACAA	TTGTATTTGAG	-0.02995	0.691571	-0.778393	1.38299	-0.940304	0.583183
ACAAAATAAAG	CTTTATTTTGT	-0.78701	0.592242	-0.939796	1.38283	-0.748086	-0.273745
ACCACATTAAC	GTTAATGTGGT	0.452062	0.724176	-0.403599	1.38241	-0.290818	-0.219539
TCTCCATTAAA	TTTAATGGAGA	0.080364	0.088195	-0.725416	1.38116	-0.43813	0.400134
AACACACACCC	GGGTGTGTGTT	-0.314527	0.388522	-0.775534	1.38008	-0.393669	0.086107
AAGAACATTTA	TAAATGTTCTT	-0.030045	-0.200021	0.122285	1.3798	0.586932	-0.787411
AACACATACCC	GGGTATGTGTT	-0.768473	0.38013	-0.406959	1.37953	-0.714871	0.741669
AATTGTGTACT	AGTACACAATT	0.516493	-0.581174	1.37942	-0.202387	0.236053	-0.341199
AGAAGATTGTG	CACAATCTTCT	0.666294	-0.485074	1.37857	-0.220514	0.233102	-0.06674
CAGGAATTTCA	TGAAATTCCTG	-0.253701	0.434393	-0.002243	1.37702	0.307726	0.438788
TGTGGCTTGAA	TTCAAGCCACA	-0.006744	-0.247471	1.37658	-0.444531	0.091235	0.280772
AATAAAATATT	AATATTTTATT	-0.794476	0.911567	-1.02434	1.37488	-0.18539	0.134421
ATCAAGCCACA	TGTGGCTTGAT	0.001099	0.044372	-0.664631	1.37431	0.537432	0.544843
CAACAAATACC	GGTATTTGTTG	-0.912086	0.539735	-0.391536	1.37403	-0.055486	0.231683
AATTTATATTA	TAATATAAATT	0.099088	-0.271106	1.37393	-0.068957	0.743569	0.402247
ACTGTGTTTTA	TAAAACACAGT	0.598942	-0.13845	1.37182	-0.693523	-0.07783	-0.194335
AAAAATCCCTT	AAGGGATTTTT	-0.412071	0.265197	0.396359	1.37108	-0.465305	0.39542
CACCCACCTCC	GGAGGTGGGTG	0.054586	-0.29122	-0.507233	1.37104	-0.193868	-0.431542
GGGGCCAGGCA	TGCCTGGCCCC	0.154517	-0.297492	1.37097	0.054889	-0.119998	-0.750782
ACACACACCTC	GAGGTGTGTGT	-0.592245	0.450632	-0.927465	1.37035	-0.496513	-0.058732
CCTAAAACACA	TGTGTTTTAGG	-0.449427	1.16719	-0.909668	1.36894	-0.494034	-0.190284
TCCACAATAAA	TTTATTGTGGA	-0.271467	0.286211	-0.840709	1.36894	-0.800456	0.435527
ACAAAACAGTA	TACTGTTTTGT	-0.060563	0.40064	-0.345853	1.36734	-0.417662	0.417815
CTCAACATAAG	CTTATGTTGAG	-0.492406	0.584146	-0.071367	1.36641	-0.385576	0.02978
TATAACATAAA	TTTATGTTATA	-0.428672	0.217103	-0.782699	1.36501	0.097184	0.408037
CCAAAATAAAG	CTTTATTTTGG	-0.697363	0.379053	-0.921173	1.36353	-0.682321	-0.013512
CACACAATCCC	GGGATTGTGTG	-0.779561	0.923121	-0.327733	1.36239	-0.356568	0.915888
AAATAAAAAAG	CTTTTTTATTT	0.32316	1.10997	-0.526804	1.36213	-0.104875	0.602821
TCTAAAATACA	TGTATTTTAGA	0.632747	0.501409	-0.416309	1.36047	-0.184192	0.560972
AGAAACAAATG	CATTTGTTTCT	-0.900041	0.212862	-0.67253	1.35965	-0.60071	-0.004036
AAAGGCAGCAG	CTGCTGCCTTT	-0.462006	-0.069085	-0.218184	1.35943	0.061221	0.116993
CATAAATAAAA	TTTTATTTATG	-0.438716	1.2636	-0.247242	1.35905	-1.01611	0.198663
CAAAATAATGC	GCATTATTTTG	0.57333	0.208491	-0.08393	1.35865	-1.21897	-0.069066
AGGTTGTGTGG	CCACACAACCT	0.823765	-0.777749	1.3576	-0.511404	-0.380857	-0.068387
TACACAATTGA	TCAATTGTGTA	-0.769097	0.33214	-0.336064	1.35727	-0.228922	0.144794
AAAACATCATT	AATGATGTTTT	-0.273293	0.261336	-0.920052	1.35646	-0.307415	0.488253
CTCCACACTAA	TTAGTGTGGAG	-0.312979	0.022511	-0.043921	1.35621	-0.389092	0.048385
ACTTTATTTTC	GAAAATAAAGT	0.370926	-0.5469	1.35618	-0.678164	0.712326	-0.558662
AATACACAATT	AATTGTGTATT	-0.76414	0.404551	0.007214	1.35583	-0.034406	0.555189
ATTCTTGTGCC	GGCACAAGAAT	0.028153	0.387894	1.35551	0.054674	0.437688	-0.191691
ACACACACCTG	CAGGTGTGTGT	-0.627153	0.302922	-0.617327	1.35477	-0.589749	-0.037299
AGGTGCACAAA	TTTGTGCACCT	-0.33464	0.156691	-0.128017	1.35452	0.34332	-1.06315
AATAAACACCT	AGGTGTTTATT	-1.01634	0.233515	-0.253851	1.35243	0.177782	0.122577
AGGGATTTTTG	CAAAAATCCCT	0.378254	-0.543837	1.35208	-0.049229	0.024171	-0.608111
CATTGTGTGGG	CCCACACAATG	0.133588	-0.826245	1.35148	-0.84636	-0.137688	-0.571653
CACAATAAATA	TATTTATTGTG	-0.73058	0.165951	-0.826818	1.35143	-0.215466	-0.072781
AAAAATCCCTG	CAGGGATTTTT	-0.122474	0.165706	0.424063	1.35075	-0.50538	0.389402
AATTGTGTGGG	CCCACACAATT	0.415229	-1.09337	1.34943	-0.675005	-0.221948	-0.400067
ATTTGTTTGTG	CACAAACAAAT	0.803008	-0.338859	1.34776	-0.384089	0.483712	-0.586566
CCCCCATTAAA	TTTAATGGGGG	-0.272343	0.169795	-0.552846	1.34724	0.055723	0.456319
ATGTGTATTAG	CTAATACACAT	1.06505	-0.394781	1.34695	-0.15166	0.447051	-0.317864
ATGTGTACTAG	CTAGTACACAT	0.38153	-0.766146	1.34661	-0.278518	0.434083	-0.127155
CCCCCACACAC	GTGTGTGGGGG	0.090075	1.23956	-0.835005	1.3444	-0.433232	0.389455
ACTTTATTGTG	CACAATAAAGT	0.529067	-0.462676	1.34434	-0.713105	0.518891	-0.354113
TCCCAAAATAA	TTATTTTGGGA	-0.154917	0.16088	-0.720559	1.34395	-0.169326	-0.083486
CCACATTAACC	GGTTAATGTGG	0.435615	0.702741	-0.46496	1.34394	0.024691	0.275835
AAGAAGATTGG	CCAATCTTCTT	0.310342	-0.410215	1.34358	-0.321246	0.268474	-0.419851
CAACATAAACC	GGTTTATGTTG	-0.873007	0.535605	-0.470905	1.34301	-0.172312	0.791119
TCAACAGTAAA	TTTACTGTTGA	0.019979	0.180612	-0.450902	1.34174	-0.207202	0.647306
AAAGCACAAAG	CTTTGTGCTTT	-0.132289	0.489681	-0.942878	1.34167	-0.361094	0.515838
CCAGGTTTGGC	GCCAAACCTGG	-0.205288	0.026386	1.34163	0.267819	0.064097	-0.480416
ACATTATTTTA	TAAAATAATGT	0.281312	0.598659	1.34147	0.364003	0.246646	-0.863234
AAAATAAAGTC	GACTTTATTTT	-0.699109	0.472257	-0.196908	1.34071	-0.893676	0.813116
GCCCACACACA	TGTGTGTGGGC	-0.182368	0.820853	-0.522278	1.34049	-0.37384	0.503011
AATATAAATTA	TAATTTATATT	-0.132051	0.057668	0.609045	1.33834	0.336056	0.204628
ACAAAATAATC	GATTATTTTGT	0.029736	0.841879	-0.331975	1.33792	-0.570116	-0.267094
ACAATCTGCTC	GAGCAGATTGT	-0.497936	0.203179	-0.027278	1.3376	0.288913	0.051829
CAAAATAAAGC	GCTTTATTTTG	-0.267448	0.064499	-1.07267	1.33652	-0.521677	0.507042
AATAAACATCA	TGATGTTTATT	-0.629761	0.96524	-0.580116	1.3355	-0.321607	0.250859
CAGAACATTTA	TAAATGTTCTG	0.318167	-0.151658	0.027231	1.33479	0.235403	-0.510854
ATTTATTGTGA	TCACAATAAAT	0.553862	-0.331488	1.33434	-0.774264	0.704342	-0.30435
TCTCAAATACA	TGTATTTGAGA	0.452696	0.576549	-0.404255	1.33278	-0.82636	0.489497
CAAGGCAGCAG	CTGCTGCCTTG	-0.250931	-0.332459	-0.213381	1.33233	-0.099616	-0.192499
AACACATACCT	AGGTATGTGTT	-0.994689	0.309827	-0.623696	1.33213	-0.544889	0.600502
AAATTTATTGT	ACAATAAATTT	0.490586	-0.452369	1.3319	-1.40045	0.431332	-0.153265
CTAAAACACAA	TTGTGTTTTAG	-0.760349	1.07486	-0.656843	1.3316	-0.354736	0.08352
ACAATCTGCTA	TAGCAGATTGT	-0.549337	0.017059	-0.120987	1.33095	0.415155	-0.194059
ATTTATTAAGA	TCTTAATAAAT	0.932351	-0.832826	1.33064	-0.083797	0.915766	0.649821
AGGGGAGAGAG	CTCTCTCCCCT	-0.302898	0.87735	-0.310794	1.33008	-0.666364	0.430289
TAAATGTTCTA	TAGAACATTTA	-0.183957	0.585513	1.32941	0.189982	-1.03322	0.557121
AACAAATAAAT	ATTTATTTGTT	-0.984578	0.265267	0.196191	1.32905	-0.276411	-0.287185
ATTTATTGGAG	CTCCAATAAAT	0.542159	-0.279901	1.32872	-0.884051	0.880715	-0.060239
AGGATTGTGTC	GACACAATCCT	0.558987	-0.443698	1.32838	-0.27379	0.473922	-0.664021
GAGAAGATTGA	TCAATCTTCTC	0.888416	-0.415148	1.32815	-0.182281	0.394141	-0.129229
ATTATTTTATA	TATAAAATAAT	0.831975	-0.400025	1.3276	-0.726489	-0.484958	-0.764137
AAAAGCACAAA	TTTGTGCTTTT	-0.436272	0.843135	-0.983635	1.32723	-0.950777	-0.029093
GCTTTATTTTA	TAAAATAAAGC	0.443926	-0.077822	1.32666	-0.772174	0.75113	-0.22278
AAGGCAGCAGG	CCTGCTGCCTT	-0.335738	0.074134	0.029599	1.32663	-0.115084	-0.014737
TCCCCATTAAA	TTTAATGGGGA	-0.44229	0.191845	-0.599441	1.32443	-0.098732	0.36426
ATCTACAACAC	GTGTTGTAGAT	-0.522967	0.335526	-0.889024	1.32403	-0.030669	-0.172683
AAACTCAGCAG	CTGCTGAGTTT	-0.172726	-0.346631	-0.820052	1.32301	0.441548	0.411766
AAGCCAGCAGT	ACTGCTGGCTT	-0.103406	0.041869	0.282859	1.32249	-0.779057	-0.290904
ATTTAATGTGG	CCACATTAAAT	0.746543	-0.606118	1.32234	-0.41523	0.155237	-0.065952
AAAAGCACATG	CATGTGCTTTT	0.1947	0.439606	-0.167338	1.32229	-0.929261	0.533595
ACAAAGCAGTA	TACTGCTTTGT	0.089962	-0.21778	-0.138204	1.32216	0.05965	0.080948
ACCCACACAAT	ATTGTGTGGGT	-0.82746	0.271604	-1.04855	1.3221	-0.405537	0.073783
AGGTGTGTGTC	GACACACACCT	0.323902	-0.725691	1.32148	-0.55887	-0.137789	-0.577559
GCACACAATCC	GGATTGTGTGC	-0.643707	0.857678	-0.336794	1.3208	-0.18014	1.03025
TGACTTGATAA	TTATCAAGTCA	0.040248	0.11189	1.32047	-0.221056	0.111889	-0.254644
TTATTTTGGAA	TTCCAAAATAA	0.465737	-0.255349	1.31973	-0.540383	0.158833	-0.514751
CACAAATAAAA	TTTTATTTGTG	-0.867279	0.811773	-0.326492	1.31831	-1.18477	0.126729
ACAACACATAC	GTATGTGTTGT	-1.21401	0.416909	-0.608585	1.31815	-0.360669	0.879307
CTCAAATAAAG	CTTTATTTGAG	0.337923	0.596826	-0.133189	1.31631	-0.210952	0.19598
AACTGTTTTGT	ACAAAACAGTT	0.659104	-0.340439	1.31566	-0.699177	0.665216	-0.259052
CTCAAATATAA	TTATATTTGAG	-1.09815	0.455361	0.063715	1.31511	-0.609291	-0.058653
ATGATATTTTC	GAAAATATCAT	0.933155	-0.711591	1.31384	-0.645356	0.326499	0.137009
AAAACACAATC	GATTGTGTTTT	-0.911019	1.03973	-0.392457	1.31334	-0.480899	0.606447
ACATAATCTTC	GAAGATTATGT	-0.525634	-0.057417	-0.004917	1.313	-0.561026	-0.033985
GGATTGTGTGA	TCACACAATCC	0.910872	-0.754338	1.31263	-0.48861	1.02415	-0.116337
ACAATGTCCTC	GAGGACATTGT	-0.457334	0.436736	-0.198803	1.31193	-0.780278	0.0769
ATCTGTACTAG	CTAGTACAGAT	0.08281	-0.343501	1.31158	-0.288631	0.173609	-0.296995
AGAATTGTGTG	CACACAATTCT	0.55176	-0.888667	1.31093	-0.123433	0.005263	0.026431
CACAAACCCTG	CAGGGTTTGTG	-0.230326	0.372399	-0.527121	1.31016	-0.275111	0.491583
AACATTAAAAA	TTTTTAATGTT	-0.456917	0.103017	-0.372884	1.30854	-0.267252	-0.020245
ATTATGTTGTG	CACAACATAAT	0.373052	0.177384	1.30822	-0.395266	0.153723	-0.722442
GTTTGACTCTA	TAGAGTCAAAC	0.153944	-0.487627	1.30817	0.221162	0.4453	-0.580159
TCCCACACACA	TGTGTGTGGGA	-0.141092	1.11577	-0.707937	1.30785	-0.535709	0.435527
GGTTTGTGTTA	TAACACAAACC	0.4489	-1.04284	1.3077	-0.665335	0.484515	-0.188219
AAACTTGGGAA	TTCCCAAGTTT	0.143062	-0.635898	1.30715	-0.795878	-0.498407	-0.575897
ACTATTTTGTG	CACAAAATAGT	0.539125	0.008556	1.30444	-0.375621	0.410495	-0.39124
TATCAAATAAA	TTTATTTGATA	-0.50601	0.424153	-0.032382	1.30441	-0.364757	-0.103883
ACATTAACCTC	GAGGTTAATGT	-0.063893	0.141712	-0.139388	1.3044	-0.307432	0.143158
ACTGTTTTGTG	CACAAAACAGT	0.612553	-0.427472	1.30408	-0.745514	0.509361	0.001914
AAGGAAGCTGA	TCAGCTTCCTT	0.350485	-0.500866	0.163881	1.30373	-0.068107	-0.447447
AAGCAGATTGC	GCAATCTGCTT	-0.040255	-0.296583	1.30372	-0.200428	-0.033382	0.291044
ACACAGTCTTC	GAAGACTGTGT	-0.793026	-0.020966	-0.51181	1.30333	0.136575	-0.240103
GACTGAGGGGA	TCCCCTCAGTC	0.083639	-0.049385	1.30239	-0.509864	-0.205969	0.057379
ACACAAACCCT	AGGGTTTGTGT	-0.711678	0.753213	-0.6126	1.30187	-0.618851	0.576966
ACCCACACACA	TGTGTGTGGGT	0.005073	0.775206	-0.527578	1.30124	-0.308093	0.588848
CCAGTCACCTC	GAGGTGACTGG	-0.18284	-0.033628	-0.23218	1.30106	-0.207095	0.472765
GATTGAGGGGA	TCCCCTCAATC	0.308843	-0.20822	1.3005	-0.597784	-0.231987	-0.115606
CCACAAAGAAA	TTTCTTTGTGG	0.206	0.640799	-0.048775	1.30041	-0.863044	0.587467
AATAAAAATTA	TAATTTTTATT	0.000349	-0.173241	-0.144572	1.29953	0.039858	0.088213
AAAACATCATG	CATGATGTTTT	-0.295138	0.627032	-0.995674	1.29901	-0.3878	0.079679
ATGTGTGGGGG	CCCCCACACAT	0.936128	-0.097824	1.29865	-0.713008	0.465698	-0.189309
GTCCTGTGCTA	TAGCACAGGAC	0.308457	0.631067	1.29818	-0.466786	0.675043	-0.146317
CCACACAATCG	CGATTGTGTGG	-0.810505	0.367555	-0.517419	1.29802	-0.344743	0.130077
CCAACAGTAAA	TTTACTGTTGG	-0.124839	0.248219	-0.463539	1.29777	-0.180488	0.425844
CCATTTTTCTA	TAGAAAAATGG	0.192692	-0.64457	0.012227	1.29737	0.366318	0.507121
ACCCAAACACA	TGTGTTTGGGT	-0.701979	1.16433	-0.751222	1.29717	-0.788965	0.502839
CAAAAAATAGC	GCTATTTTTTG	-0.18246	-0.380797	-0.292878	1.29678	-0.297662	0.546514
ACAATCTTCTC	GAGAAGATTGT	-0.172023	0.89478	-0.231808	1.29668	0.070977	0.247945
TCCCCAGTAAA	TTTACTGGGGA	-0.232158	-0.286076	-0.180716	1.29655	-0.308386	0.51764
ACCACAAACAA	TTGTTTGTGGT	-0.356013	1.0862	-0.542519	1.29608	0.39742	0.142249
CAACACACACC	GGTGTGTGTTG	-0.671775	0.364216	-1.16815	1.29583	0.21021	0.055903
CTCCAATAAAC	GTTTATTGGAG	-0.441728	0.652079	-1.03407	1.29582	-0.345476	0.683895
CTGCCTGGCCC	GGGCCAGGCAG	-0.172131	-0.006073	0.194709	1.29519	-0.618594	-0.217923
AAAATATCATC	GATGATATTTT	-0.78009	0.411493	-0.613532	1.29475	-0.098943	0.238383
TAAAGCACATA	TATGTGCTTTA	0.115193	0.337363	0.013682	1.29464	-0.725737	0.487389
ATTGTGTGGAG	CTCCACACAAT	-0.119267	-0.710455	1.29388	-0.37057	0.12892	-0.558046
GCTATTTTTTA	TAAAAAATAGC	-0.104851	-0.340991	1.2937	-0.049281	0.239632	0.240856
AAGATTGTGTC	GACACAATCTT	0.314103	-0.485306	1.29325	-0.602998	-0.23956	-0.43906
TCAAGCCACAA	TTGTGGCTTGA	-0.19683	-0.02214	-0.221302	1.29315	0.435764	0.423892
CTCTCAACAAA	TTTGTTGAGAG	-0.021805	0.080866	-0.00124	1.29306	-0.189509	-0.50871
ATTGTGTACTG	CAGTACACAAT	0.332556	-0.578538	1.29269	-0.050942	0.248348	-0.453893
CAAGAATAAAA	TTTTATTCTTG	-0.18703	-0.014626	-0.495613	1.29259	-0.455933	-0.018531
AGAAGATTGGG	CCCAATCTTCT	0.434332	-0.527193	1.29238	-0.28799	0.188671	-0.426902
AAAGCCAGCAG	CTGCTGGCTTT	-0.180767	-0.220482	0.245729	1.29214	-0.790288	0.189356
AACACATACCA	TGGTATGTGTT	-0.873644	0.439896	-0.40863	1.29197	-0.206796	0.887143
CCTCCATTAAA	TTTAATGGAGG	-0.13261	0.040158	-0.656092	1.29186	-0.152424	0.401548
TAAAGCACAAA	TTTGTGCTTTA	-0.447178	0.627827	-0.850446	1.29184	-0.41449	0.462689
ATTGTATGTGG	CCACATACAAT	0.837102	-0.075246	1.29177	-0.522132	0.458258	-0.317434
CCCAAATCTTC	GAAGATTTGGG	-0.027979	-0.117625	-0.522457	1.29152	-0.219789	0.345211
TCTCAACAAAA	TTTTGTTGAGA	0.093403	-0.071388	-0.014397	1.29092	0.118694	-0.201472
CCAATTTTCTC	GAGAAAATTGG	-0.273716	0.4653	0.04838	1.29063	-0.204425	0.381541
AATTGTGTATG	CATACACAATT	0.346334	-0.847876	1.28953	-0.062119	0.425633	-0.123801
AGTACACAATG	CATTGTGTACT	-0.245064	0.164411	-0.127382	1.28846	-0.334836	0.162793
CACAAAGAAAA	TTTTCTTTGTG	-0.415069	0.62102	-0.309617	1.28846	-1.37815	0.13575
AGAAACACATA	TATGTGTTTCT	-0.913878	0.680038	-1.13909	1.28845	-0.507429	0.592551
GTTATTTTGTA	TACAAAATAAC	0.919067	-0.762218	1.2884	-0.376891	0.301619	0.101198
ACAATTGTGTG	CACACAATTGT	0.234194	-0.766226	1.28749	-0.281206	0.018103	-0.379204
AAAGCACATAA	TTATGTGCTTT	-0.108479	0.32417	-0.139943	1.28742	-0.657856	0.651281
CTAAAATATAA	TTATATTTTAG	-1.24524	0.336742	-0.017634	1.28728	0.318337	0.621823
CTAAAATCCAG	CTGGATTTTAG	-0.200772	0.155684	-0.387229	1.28702	-0.36385	0.55356
AAGTTAGTGTG	CACACTAACTT	-0.090241	-0.221944	1.28661	-0.365756	0.182786	0.39482
CCACAATGACA	TGTCATTGTGG	0.031736	0.443795	-0.525495	1.28607	-0.24658	0.380344
ACCTCAAATAC	GTATTTGAGGT	0.37493	-0.000891	-0.525003	1.28603	-0.467322	0.52801
AGATTATTTTG	CAAAATAATCT	0.333671	0.205481	1.28602	-0.201334	-0.200306	-0.232374
AGAACATTTAA	TTAAATGTTCT	0.275596	-0.28288	0.43667	1.28577	0.392548	-0.635861
AAAATAATGTG	CACATTATTTT	0.814382	0.034854	0.494871	1.28554	-0.467176	0.265068
AAATTGTGTAT	ATACACAATTT	0.524057	-0.612752	1.28544	0.070112	0.187871	-0.104312
AACAATAAAGT	ACTTTATTGTT	-0.686581	0.475369	-0.871833	1.28539	-0.203962	0.16842
CTTTGACTCTA	TAGAGTCAAAG	0.294533	-0.416535	1.28515	0.048165	0.272436	-0.408862
ATGTGCTTTTG	CAAAAGCACAT	0.454945	0.228767	1.28503	-0.647307	0.49174	-1.00512
CATTATTTTGC	GCAAAATAATG	0.424713	-0.027186	1.28483	-0.368819	-0.283213	-1.1603
GCCATTGTGTA	TACACAATGGC	0.259758	-0.446343	1.28456	0.119796	-0.071369	-0.398093
ATACACAATTC	GAATTGTGTAT	-0.9981	0.31329	0.014831	1.28366	-0.149705	0.350711
GCTTCAGTTGA	TCAACTGAAGC	0.137252	-0.593024	-0.331985	1.283	-0.119888	0.148809
AATAAAAAATA	TATTTTTTATT	-0.786036	0.382391	-0.483832	1.28272	-0.12366	0.29381
AAGCACAGGAC	GTCCTGTGCTT	0.787169	0.026722	-0.425767	1.2813	-0.247225	0.725556
TAGTCCTAGAA	TTCTAGGACTA	-0.399878	-0.380506	-0.289667	1.28106	-0.841854	0.058811
CCCTCAAATAC	GTATTTGAGGG	-0.01538	0.237765	-0.27943	1.28103	-0.482467	0.625077
TAGGAATCTCA	TGAGATTCCTA	-0.334676	-0.151822	-0.048529	1.28077	0.175563	0.192997
CCAATTAACCC	GGGTTAATTGG	-0.50143	0.103399	-0.158473	1.28072	-0.278493	0.39276
ACAAACCCTGG	CCAGGGTTTGT	0.285225	-0.042141	-0.225136	1.28036	-0.226321	0.545188
AATAAATTGCT	AGCAATTTATT	-0.338708	0.047977	-0.132162	1.2802	0.743834	0.105438
CAATTTACTCA	TGAGTAAATTG	-0.311652	0.315422	0.203028	1.28008	-0.071835	-0.14075
AACATTAACCT	AGGTTAATGTT	-0.17503	0.22531	-0.234621	1.27981	-0.597681	0.026611
CATCAACCCTA	TAGGGTTGATG	0.076268	-0.092581	0.041278	1.27953	0.318683	0.14186
AAACACATACC	GGTATGTGTTT	-1.08059	0.43983	-0.421439	1.27911	-0.585348	0.978074
ATGGTGGTGCA	TGCACCACCAT	0.959792	0.16901	1.27858	-0.226424	-0.421001	-0.314796
CCACAAACACA	TGTGTTTGTGG	-0.467802	1.21612	-0.791954	1.27802	-0.855878	0.170494
CCAAACCTGGA	TCCAGGTTTGG	0.299794	-0.111064	0.195858	1.2772	-0.111611	-0.001085
ACCTCAGTTGA	TCAACTGAGGT	0.104762	-0.233098	-0.198266	1.27711	-0.315274	-0.359523
TAGGAATTTCA	TGAAATTCCTA	-0.174999	-0.046171	-0.078826	1.27693	0.349135	0.349951
ACAATCTGCTG	CAGCAGATTGT	-0.660747	0.102302	0.046384	1.27662	0.040489	0.180573
ACAAATAAATG	CATTTATTTGT	-0.838438	0.013974	-0.278056	1.27628	-0.638873	0.173713
CCCCTCAGTCA	TGACTGAGGGG	-0.634254	-0.04433	-0.482061	1.27578	0.526247	-0.273724
TAACTAGGGAA	TTCCCTAGTTA	-0.144729	0.163409	1.27547	-0.659693	0.088888	0.172957
AACAAAACAGT	ACTGTTTTGTT	-0.336817	0.772716	-0.63105	1.2754	-0.034197	0.261234
AATAAAATATC	GATATTTTATT	-0.880227	0.936846	-0.612546	1.27528	-0.057017	0.498882
AGGAGAGAGAG	CTCTCTCTCCT	0.011272	0.6331	-0.627402	1.2741	-0.335539	0.122964
CACCACATTAA	TTAATGTGGTG	0.142688	0.909954	-0.31513	1.27394	-0.499157	-0.283295
CCCCATTAAAG	CTTTAATGGGG	-0.648596	0.319929	-0.691232	1.27367	-0.300277	0.563466
CACACAGGCTG	CAGCCTGTGTG	0.411961	0.14268	-0.000635	1.27356	-0.233512	0.218728
AAATAAAAAAC	GTTTTTTATTT	-0.084931	0.670488	-0.534257	1.27319	-0.040643	0.391555
AACACACACCG	CGGTGTGTGTT	-0.198621	0.203449	-0.840719	1.27229	-0.1571	-0.00996
AAGAAACCCTC	GAGGGTTTCTT	0.455842	0.168453	0.288889	1.27211	-0.357064	-0.075546
GATGTTTATTA	TAATAAACATC	1.01574	-0.972566	1.27207	-0.364657	0.604752	-0.361234
CCCACAATAAA	TTTATTGTGGG	0.108464	0.393213	-0.555916	1.27194	-0.463599	0.286098
AAGGCAGCAGA	TCTGCTGCCTT	-0.729834	-0.035046	-0.155304	1.27179	-0.300207	0.216134
CAATTTCAAAG	CTTTGAAATTG	-0.371161	0.054059	0.007203	1.27154	-0.181889	0.384004
CCCCAGTAAAG	CTTTACTGGGG	-0.419342	-0.04028	-0.478171	1.27143	-0.140735	0.530133
AAAAACATCAT	ATGATGTTTTT	-0.513856	0.453069	-0.820007	1.27107	-0.001787	0.319083
ACACATGCAAA	TTTGCATGTGT	-0.335854	0.530636	-0.702769	1.27095	-0.543794	0.124975
CATGGTGGTGC	GCACCACCATG	0.827659	0.014183	1.27092	-0.230572	-0.472256	-0.115234
CAATTGTGTAG	CTACACAATTG	0.329316	-0.859075	1.27084	0.004758	0.165939	-0.425552
AACTATTTTGT	ACAAAATAGTT	0.588359	-0.084459	1.27076	-0.259361	0.083266	-0.537348
ATCTGTACTAA	TTAGTACAGAT	-0.023471	-0.216814	1.27057	-0.497169	0.204689	-0.100164
ATTATGTTGTC	GACAACATAAT	0.253366	0.266691	1.2705	-0.199935	-0.151484	-0.424271
CAACAGTAAAC	GTTTACTGTTG	-0.012599	0.433313	-0.509032	1.27037	-0.496162	0.476629
ATTGTGTTGTC	GACAACACAAT	0.400699	-0.019947	1.27023	-0.114413	0.029986	-0.334845
CCCAAAATAAC	GTTATTTTGGG	-0.195569	0.168688	-0.397097	1.26959	-0.456078	-0.15418
AGACAGAGGGG	CCCCTCTGTCT	0.088988	-0.43055	1.26948	-0.011091	-0.576007	0.044524
ACAAATCTACA	TGTAGATTTGT	-0.591825	0.662128	-0.431054	1.2694	0.15098	0.604723
ATTTATTTGTA	TACAAATAAAT	0.659676	-0.998574	1.26892	-0.602004	0.014189	-0.525595
GAAGATTGTGA	TCACAATCTTC	0.292321	-0.786405	1.26882	-0.350791	0.068607	-0.352852
ATAACATAAAT	ATTTATGTTAT	-0.479476	0.312807	-0.906692	1.26861	0.048953	0.711516
ACACAAACCTA	TAGGTTTGTGT	-0.649188	1.10017	-0.511604	1.2682	-0.552242	0.752912
AAACACACACC	GGTGTGTGTTT	-0.836228	0.682577	-0.762517	1.26817	-0.254471	0.276913
CCTCTCTCCCC	GGGGAGAGAGG	1.02412	-0.556121	1.26806	-0.242322	0.431072	-0.695119
ATAGTCACACA	TGTGTGACTAT	-0.40323	0.662661	-0.987181	1.26759	-0.605891	-0.036655
TTATTTGAGAA	TTCTCAAATAA	0.749473	0.187551	1.26677	0.307453	0.018994	-0.339317
AAAAAATAGCT	AGCTATTTTTT	-0.492021	-0.298094	0.156132	1.26672	-0.200748	0.193814
ATTTGTTTGTC	GACAAACAAAT	0.442213	-0.268556	1.26649	-0.529767	0.550314	-0.726909
CCAGGAATTTC	GAAATTCCTGG	-0.171158	0.570367	0.536118	1.26613	0.051588	0.104006
CCACAATCTTC	GAAGATTGTGG	-0.705409	0.417606	-0.220928	1.26598	-0.390195	-0.073943
ATCTAAAATAA	TTATTTTAGAT	0.346959	-0.334343	0.023889	1.26577	-0.166996	0.195551
CAAATTAACCC	GGGTTAATTTG	-0.089781	0.3145	0.013586	1.26455	0.173486	0.816462
GTCAAGCCACA	TGTGGCTTGAC	-0.039265	0.135412	-0.296099	1.2644	0.384894	0.07973
CACAACATAAA	TTTATGTTGTG	-0.087411	0.644865	-0.448589	1.26416	-0.668581	0.350763
AAACACACTAC	GTAGTGTGTTT	-0.533879	0.539072	-0.979174	1.26387	0.190082	0.397727
TATTTATTGGA	TCCAATAAATA	0.442239	-0.678508	1.26382	-0.767953	0.742675	0.189386
CCAACATAAAA	TTTTATGTTGG	-0.436951	1.00853	-0.531837	1.26369	-1.05457	0.350681
CCATTAACCTA	TAGGTTAATGG	-0.188319	0.039713	0.138495	1.26358	-0.281025	0.168136
CAAGCCAGCAG	CTGCTGGCTTG	-0.067955	-0.167455	0.289967	1.26352	-0.721313	-0.025826
CAGGTGAGTGA	TCACTCACCTG	-0.337501	0.287839	1.2632	-0.236435	-0.512969	-0.62092
GTCCAAAATAA	TTATTTTGGAC	-0.591222	0.432164	-0.406795	1.26313	-0.491526	0.144129
ATTTTTTATTC	GAATAAAAAAT	0.788361	-0.718705	1.26305	-0.39764	0.802281	-0.29442
AATGTGTACTA	TAGTACACATT	0.337978	-0.950247	1.26289	-0.577806	0.473981	-0.319281
CAGTACAGAGG	CCTCTGTACTG	-0.545942	-0.11511	-0.272266	1.26284	-0.365105	0.175235
ATATCACAAAT	ATTTGTGATAT	-0.130433	0.26973	-0.199456	1.26283	-0.030675	0.276403
AGTTAGTGTGG	CCACACTAACT	0.005588	-0.274597	1.26281	-0.401949	-0.100908	0.224678
TCTCCAACACA	TGTGTTGGAGA	-0.147123	0.693386	-0.437896	1.26272	-0.318068	0.239878
AAAGCACATAT	ATATGTGCTTT	-0.013857	0.601181	-0.062029	1.26269	-1.05941	0.424267
ATGTGCTTTTC	GAAAAGCACAT	0.704504	-0.248891	1.26231	-0.638795	0.337894	-1.03095
GATCAACCCTA	TAGGGTTGATC	-0.01021	0.138862	-0.140644	1.26191	0.133536	0.229891
AATTTGTTTGT	ACAAACAAATT	0.473831	-0.412055	1.26161	-0.603595	0.101909	-0.31841
AAATAAAATTT	AAATTTTATTT	-0.23006	0.289103	-1.26783	1.2611	-0.290584	0.032765
AAAACACAGTT	AACTGTGTTTT	-0.268831	0.791347	-0.911581	1.26084	-0.382272	0.169144
TCTCCACACAA	TTGTGTGGAGA	-0.46245	-0.144202	-0.612864	1.26083	-0.250981	0.133516
AAAAACACAAT	ATTGTGTTTTT	-0.782208	1.23729	-0.567058	1.26067	-0.445498	-0.156084
AGCTTATTTTG	CAAAATAAGCT	0.156695	-0.561982	1.26047	-0.020234	0.357942	-0.068803
CCAAAATAAAC	GTTTATTTTGG	-1.24191	1.00575	-0.698518	1.26042	-0.573404	0.090604
ACAATAAATTC	GAATTTATTGT	-0.564597	0.56664	-1.09565	1.26011	8.2e-05	0.462269
GCCCCACACTA	TAGTGTGGGGC	-0.414775	-0.040089	-0.714363	1.26	0.288199	0.050946
GTCTCAAATAA	TTATTTGAGAC	0.397047	0.46623	0.421041	1.25974	-0.384067	-0.265963
ACCACACAACC	GGTTGTGTGGT	-0.748855	0.400711	-0.507607	1.25962	-0.127858	-0.670983
CCAAAGCCACA	TGTGGCTTTGG	0.148668	-0.036072	-0.595258	1.25835	-0.485478	0.584563
ATAACATAAAC	GTTTATGTTAT	-0.595974	0.343701	-0.731661	1.2581	0.178695	0.833516
CAACACATTAA	TTAATGTGTTG	-0.19201	0.363063	-0.647179	1.25799	-0.509046	0.385755
AAAGCACAAAA	TTTTGTGCTTT	-0.041775	0.58681	-0.959476	1.25782	-0.32212	0.402861
CAAGCACAAAG	CTTTGTGCTTG	-0.209464	0.4422	-0.608036	1.25773	-0.207191	0.647195
GGTATTTATTA	TAATAAATACC	0.046319	-1.10655	1.25682	-0.234566	0.473175	0.001016
CCACACAATCA	TGATTGTGTGG	-0.819034	0.608185	-0.324202	1.25656	-0.151206	0.258661
CAAATCTACAC	GTGTAGATTTG	-0.967408	0.32845	-0.566786	1.25651	0.228085	0.300059
ATAAAATAAAG	CTTTATTTTAT	-0.594566	0.804419	-0.655012	1.25639	-0.177031	0.164536
CCTAAAATACA	TGTATTTTAGG	0.39705	0.521348	-0.575634	1.25638	-0.388902	0.65669
AAAAAGCAGTA	TACTGCTTTTT	-0.512363	0.236993	0.167673	1.25614	-0.156757	0.485976
GTTATTTTGGA	TCCAAAATAAC	0.33633	-0.486901	1.25603	-0.414873	0.036238	-0.602032
CCCAAAATAAG	CTTATTTTGGG	-0.006551	-0.013841	-0.298702	1.25599	-0.508832	0.005167
AAAAAATACCT	AGGTATTTTTT	-0.34211	-0.050119	-0.053689	1.25596	-0.21243	0.255888
ACAAATTAATC	GATTAATTTGT	-0.303976	0.531175	-0.264388	1.25572	0.024706	0.152599
CATTGAGGGGA	TCCCCTCAATG	0.346551	-0.073564	1.25512	-0.547893	-0.106697	-0.213768
ACAAATTAATA	TATTAATTTGT	-0.145078	0.161356	-0.53408	1.25505	-0.019516	-0.116913
AACACAATCTT	AAGATTGTGTT	-0.718237	0.219618	-0.321555	1.25487	-0.691152	0.153452
ACACAATCTTG	CAAGATTGTGT	-0.69513	0.035501	-0.464764	1.25483	-0.746736	-0.086857
ATAACAAATAA	TTATTTGTTAT	-0.483942	-0.224807	0.085078	1.25459	-0.024833	0.204103
ATGTGTGTGGG	CCCACACACAT	1.02614	-0.130982	1.25401	-0.866338	0.709452	-0.411366
CACACAATTGC	GCAATTGTGTG	-0.956827	0.466677	-0.132341	1.2537	-0.361064	0.140036
ACAAATTAACC	GGTTAATTTGT	-0.338502	0.622128	-0.421705	1.25349	0.249318	0.678087
CCCCAATCTTC	GAAGATTGGGG	-0.564258	0.314826	-0.27517	1.25306	-0.497261	-0.038703
AGTGTGTGGGG	CCCCACACACT	0.985743	-0.451815	1.25299	-1.0221	0.332559	-0.36807
ATTTGTTTCTG	CAGAAACAAAT	0.0208	-0.836477	1.25298	-0.708576	0.53508	-0.549318
AAATAAATGCC	GGCATTTATTT	-0.879131	0.262754	-0.538026	1.25251	-0.562159	0.521005
GCTAATTTTTA	TAAAAATTAGC	-0.361277	0.26327	1.25245	0.408859	0.274115	-0.147226
CACTCACCTCC	GGAGGTGAGTG	0.164854	-0.27734	-0.705896	1.25241	-0.434244	-0.09236
ACACCCACCTC	GAGGTGGGTGT	-0.052797	-0.22974	-0.473569	1.25188	-0.430572	-0.610596
CTTCTCTGATA	TATCAGAGAAG	0.293011	-0.037692	1.25164	0.093653	0.267847	-0.438865
GCCACAATAAA	TTTATTGTGGC	0.020572	0.339828	-0.673054	1.25122	-0.503671	0.351664
CCACAATAAAA	TTTTATTGTGG	-0.075648	0.42788	-0.790513	1.25113	-0.672722	0.327479
ACAACATAATC	GATTATGTTGT	0.120551	0.381857	-0.459792	1.25111	-0.785496	-0.307339
GCTATATTTTA	TAAAATATAGC	0.172089	-0.337543	1.25064	0.039973	0.206352	0.125407
CATTAATAGAA	TTCTATTAATG	-0.22548	0.805138	-0.056211	1.24975	0.369372	0.429284
ATGTGTTTCAG	CTGAAACACAT	1.15179	-0.274412	1.24945	-0.759072	0.33306	-0.256304
ACAAACAAATA	TATTTGTTTGT	-0.369655	0.535924	-0.31009	1.24887	-0.504509	0.186155
ACAACACAATC	GATTGTGTTGT	-0.501079	0.606446	-0.453625	1.24886	-0.778294	0.100398
ATTGTGTAGAG	CTCTACACAAT	0.173547	-0.693937	1.24871	-0.180095	0.013492	-0.792143
GCCAACATAAA	TTTATGTTGGC	-0.069283	0.659685	-0.49845	1.24861	-0.788194	0.358056
ACTGCTTTTTA	TAAAAAGCAGT	-0.032898	-0.208415	1.24851	-0.027462	0.820639	0.156846
AAGGTGTGTGT	ACACACACCTT	0.638041	-0.6262	1.2485	-0.924282	-0.21953	-0.786578
GCTTATGTTGA	TCAACATAAGC	0.802486	-0.646883	1.24835	0.096693	0.268267	-0.231412
AATTGTTAATA	TATTAACAATT	0.254136	-0.045945	0.586763	1.24804	0.440371	-0.232785
CAACAGTAAAA	TTTTACTGTTG	-0.120757	0.444961	-0.630681	1.24798	-0.362616	0.78839
GAGTAAATTGA	TCAATTTACTC	0.325969	-0.750817	1.24742	0.208362	0.155895	0.214973
CCACAAAACAG	CTGTTTTGTGG	-0.575816	0.790291	-0.778934	1.24737	0.16701	0.198042
AAGGCAGCAGT	ACTGCTGCCTT	-0.581435	0.001104	0.020125	1.24737	-0.413086	-0.294623
CCCAATAAATA	TATTTATTGGG	-0.855834	0.291843	-0.617546	1.24707	-0.14732	0.601595
CCACATTAAAA	TTTTAATGTGG	-0.832673	0.551784	-0.585404	1.24702	-0.054974	0.169055
ACCCCATTAAA	TTTAATGGGGT	-0.667378	0.136186	-0.637824	1.24685	-0.096259	0.251994
ATGATGTTTTC	GAAAACATCAT	0.53335	-0.813352	1.24673	-0.905932	0.171769	0.042013
CCAATTGTGTA	TACACAATTGG	0.121685	-0.512447	1.24649	-0.159444	0.242105	-0.036128
AAACCCAGCAA	TTGCTGGGTTT	0.63567	-0.516464	-0.299184	1.24626	0.231218	0.600813
CAACATTAAAA	TTTTAATGTTG	-0.253385	0.792864	-0.905375	1.24614	-0.24916	-0.295021
AAATAAAGTTC	GAACTTTATTT	-0.215225	0.505371	-1.24669	1.24598	-0.207363	0.403485
CAGGTGGGTGG	CCACCCACCTG	-0.15545	0.475393	1.24542	-0.283775	-0.494614	-0.256656
CAATAAATTCC	GGAATTTATTG	-0.71412	0.362036	-0.739308	1.24511	-0.1883	0.577344
CCACACAACCC	GGGTTGTGTGG	-0.636992	0.658838	-0.533638	1.24496	-0.021816	-0.167062
AACTAGGGAAA	TTTCCCTAGTT	-0.25478	0.187288	1.24467	-0.559911	0.114195	0.056434
ATTTCTTTGTC	GACAAAGAAAT	0.17163	0.129994	1.24466	-0.090282	0.013093	-0.931778
GAGGTGGGTGA	TCACCCACCTC	-0.316396	0.440532	1.24462	-0.481046	-0.612585	-0.462588
AAACCCAGCAC	GTGCTGGGTTT	0.093976	-0.642783	-0.193613	1.24413	0.377972	0.090985
TCTCTACACAA	TTGTGTAGAGA	-0.269049	0.373347	-0.384647	1.24366	-0.438669	-0.015225
AACACACACCA	TGGTGTGTGTT	-0.26859	0.392206	-0.919695	1.24349	0.347409	0.318365
AAAAGCACATT	AATGTGCTTTT	-0.004334	0.738256	-0.305818	1.24309	-1.02927	0.191542
GAGGTGAGTGA	TCACTCACCTC	-0.230819	0.22673	1.24297	-0.638356	-0.234771	-0.736363
CCACATTAAAC	GTTTAATGTGG	-0.766086	0.921235	-0.687434	1.24284	-0.362578	0.220048
AGAATTGTGTA	TACACAATTCT	0.242462	-0.933987	1.24269	-0.044006	0.1711	-0.198483
AATAAATATCA	TGATATTTATT	-0.879339	-0.068494	0.14243	1.24247	-0.209425	0.251996
ATAAAGCCACA	TGTGGCTTTAT	-0.05248	0.070053	-1.0312	1.24245	-0.008698	0.752575
CTTATTTTGGA	TCCAAAATAAG	0.153665	-0.297742	1.24242	-0.316405	0.195704	-0.654826
GGAATAAAAAA	TTTTTTATTCC	-0.649655	0.587883	-0.223734	1.242	-0.131687	0.748178
ATTTGTTTGTA	TACAAACAAAT	0.420438	-0.623453	1.2411	-0.351495	0.567453	-0.446187
ATAAAATATAG	CTATATTTTAT	-0.976672	0.624475	-0.222696	1.24056	0.345626	-0.018452
GATATTTATTA	TAATAAATATC	0.547509	-1.08729	1.24012	-0.021265	0.38969	-0.365609
ATTTGACTCTA	TAGAGTCAAAT	0.200865	-0.435633	1.23992	0.301765	0.303716	-0.157645
GAAGACTGTGA	TCACAGTCTTC	0.037725	-0.987123	1.23979	-0.212653	-0.19449	0.045085
CCACAATGACC	GGTCATTGTGG	-0.069187	0.546251	-0.754629	1.23967	-0.422308	0.228362
TCAGTGGAGAA	TTCTCCACTGA	-0.018826	0.055127	1.23966	0.018591	-0.07741	0.075684
AAAAATAAGCT	AGCTTATTTTT	-0.202231	-0.759995	-0.091948	1.2389	-0.266921	0.262709
TATAAAATAAA	TTTATTTTATA	-1.01846	0.699196	-0.759447	1.23873	-0.51746	-0.449214
AATTTTTATTA	TAATAAAAATT	0.243069	-0.559181	1.23842	-0.570791	0.421001	-0.263026
CTGTGGCTTGA	TCAAGCCACAG	0.005851	-0.126431	1.23838	-0.251452	0.029874	0.418873
ATTTGATTCTA	TAGAATCAAAT	0.534823	-0.123977	1.23837	-0.127216	-0.219129	-0.443935
ACTGTGTTTTG	CAAAACACAGT	0.636326	-0.411245	1.23822	-1.1421	-0.105756	-0.304106
TCTACAACACA	TGTGTTGTAGA	-0.403463	0.613536	-0.594168	1.23807	-0.475829	-0.033381
CCCCAAAACAC	GTGTTTTGGGG	-0.37253	1.07975	-0.995841	1.23798	-0.690157	-0.022133
CAACATAAACA	TGTTTATGTTG	-0.851059	0.875907	-0.374589	1.23777	0.052146	0.607311
CTCAAATACAG	CTGTATTTGAG	0.204421	0.424252	-0.44123	1.23738	-0.555314	0.642661
TTAGAGTCAAA	TTTGACTCTAA	-0.444873	0.037617	0.1954	1.23711	-0.061157	0.228275
AAGAAGAATGT	ACATTCTTCTT	0.213122	-0.763943	1.23701	0.185181	0.076486	-0.291762
GATAACATAAA	TTTATGTTATC	-0.184829	0.11441	-0.37482	1.23698	-0.169319	0.419214
CCAGGGTTTGC	GCAAACCCTGG	-0.156617	0.129738	1.23661	-0.085505	0.399689	-0.0052
GTTATGTTTTA	TAAAACATAAC	0.410299	-1.05802	1.23606	-0.329654	0.325131	0.156003
AGTTTATGTTG	CAACATAAACT	0.553745	-0.794925	1.23598	-0.625154	0.833653	-0.129015
AGGTGTGTGTG	CACACACACCT	0.462891	-0.357712	1.23592	-0.977602	0.070384	-0.589007
GCTCAAATACA	TGTATTTGAGC	0.445549	0.569217	-0.402462	1.23552	-1.03094	0.514724
CTGAAACACAC	GTGTGTTTCAG	-0.636148	0.832286	-0.9545	1.2355	-0.673975	0.308929
GATTAATGTGA	TCACATTAATC	1.08385	-0.522507	1.23547	-0.48777	0.332294	-0.31823
CAAAATAAAGG	CCTTTATTTTG	-0.410944	0.620214	-0.917335	1.23537	-0.277466	0.415199
AATGTTCTCAT	ATGAGAACATT	-0.095968	0.278656	0.302036	1.23528	-0.696152	0.213589
GTAAAGCCACA	TGTGGCTTTAC	-0.040429	-0.154179	-0.619713	1.23517	0.009477	0.491374
CAAAAAATACC	GGTATTTTTTG	-0.324137	0.211504	-0.197282	1.23516	-0.267389	0.433775
ATCCACACACA	TGTGTGTGGAT	-0.333648	0.957448	-1.95934	0.427894	-0.354469	0.857887
AATCCACACAC	GTGTGTGGATT	-0.738133	0.679694	-1.81176	0.424435	-0.614637	0.46918
AATTTTATTGA	TCAATAAAATT	-0.008324	-0.496644	0.862435	-1.7894	0.130731	-0.853125
AAGTTTATTGG	CCAATAAACTT	0.537554	-0.28874	0.837278	-1.76493	0.353851	-0.939108
ATCAATAAAAT	ATTTTATTGAT	-0.800756	0.008606	-1.75651	0.953619	-0.613302	0.44622
TGTGTGTGGAA	TTCCACACACA	1.01742	-0.75853	0.509937	-1.7449	0.786209	-0.116017
GTGTGTGTGGA	TCCACACACAC	0.914614	-0.405276	0.900021	-1.73677	0.62377	-0.306084
GTCCACACACA	TGTGTGTGGAC	-0.460377	1.01297	-1.70977	0.588542	-0.179326	0.682134
CTCCACACACA	TGTGTGTGGAG	-0.355546	0.803662	-1.70257	0.606756	-0.083067	0.722268
CTAAACCACAG	CTGTGGTTTAG	-0.465524	0.416594	-1.6911	0.313288	-0.390551	0.766687
CTAAACCACAA	TTGTGGTTTAG	-0.888741	0.387799	-1.68665	0.207258	-0.561805	0.613873
ATGTGTGTGGA	TCCACACACAT	1.08033	-0.44228	0.730047	-1.65985	0.863848	-0.293837
ATCCACACACC	GGTGTGTGGAT	-0.234405	0.913141	-1.64701	0.379891	-0.210085	0.415595
CTGTGTGTGGA	TCCACACACAG	0.750353	-0.314564	0.706965	-1.64688	0.716205	-0.535522
AGTGTGTGGAT	ATCCACACACT	0.463608	-0.228632	0.524761	-1.64612	0.691602	-0.194832
CTGTGGTTTAA	TTAAACCACAG	0.353152	-0.474808	0.454715	-1.64031	1.15126	-0.375662
TTAAACCACAA	TTGTGGTTTAA	-0.898025	0.324356	-1.63586	0.348685	-0.546916	0.998443
ATGTGGTTTAG	CTAAACCACAT	0.362286	-0.593485	0.475514	-1.61352	0.48404	-0.353592
CAATAAAATTG	CAATTTTATTG	-0.313724	-0.09459	-1.60352	0.802326	-0.652348	0.040231
CAATAAAATTC	GAATTTTATTG	-0.56798	0.000304	-1.58709	0.8633	-0.551374	0.078656
CCAATAAACTA	TAGTTTATTGG	-0.28693	0.525185	-1.58479	0.866556	-0.534657	0.728632
CCTAAACCACA	TGTGGTTTAGG	-0.61257	0.289421	-1.5821	0.373357	-0.448504	0.257311
CTAAACCACAC	GTGTGGTTTAG	-0.851546	0.46081	-1.57391	0.236932	-0.705502	0.481494
AAATTTTACAA	TTGTAAAATTT	-0.109143	0.305601	-1.57268	0.206286	0.536656	-0.363599
ATGTGGTTTAA	TTAAACCACAT	0.298844	-0.602769	0.616941	-1.56273	0.868609	-0.338703
AAATGTGTTTG	CAAACACATTT	1.25612	-0.974218	0.367543	-1.55438	0.270315	-0.493893
TAAAACATTAA	TTAATGTTTTA	-0.654209	0.150014	-1.55044	0.687699	-0.451458	-0.005441
ATTTTATTGAA	TTCAATAAAAT	0.284431	-0.472729	0.72145	-1.54906	0.364718	-0.617996
CCAAAACACAG	CTGTGTTTTGG	-0.602218	1.09315	-1.54729	1.13543	-0.236074	-0.065092
ACCAATAAACT	AGTTTATTGGT	-0.398693	0.272283	-1.54609	0.961389	-0.640198	0.265164
TAACCAACCAA	TTGGTTGGTTA	-0.122462	0.300259	-1.54359	0.449976	0.217894	-0.395873
AGTTTATTGGA	TCCAATAAACT	0.708973	-0.596258	0.999594	-1.53653	0.507944	-0.520037
AAATTTATTGG	CCAATAAATTT	0.298776	-0.571519	0.997402	-1.53408	0.281082	-0.426825
TATTTTATTGA	TCAATAAAATA	0.61505	-0.385071	0.921456	-1.53293	0.531032	-0.677905
ATCCACAAACA	TGTTTGTGGAT	-0.244475	0.839161	-1.53291	0.588952	-0.153168	0.202126
AATTTTATTGT	ACAATAAAATT	-0.071768	-0.475185	0.998221	-1.52971	0.133322	-0.583659
TAAACAACAAA	TTTGTTGTTTA	-0.62227	0.108048	-1.52515	0.36625	-0.034397	-0.178402
GTGTGGTTTAA	TTAAACCACAC	0.397368	-0.86083	0.378359	-1.52311	0.866063	-0.690613
ATCAATAAAAC	GTTTTATTGAT	-0.573406	-0.007433	-1.51642	0.605328	-0.381451	0.776461
AAATAAAATTG	CAATTTTATTT	0.012158	0.377944	-1.51609	0.880524	-0.082192	-0.213688
ATGTGGTTGAA	TTCAACCACAT	1.18274	-0.081073	0.253539	-1.51454	0.666821	-0.430837
AAATTTAACAT	ATGTTAAATTT	-0.134969	0.66499	-1.51213	0.07767	-0.028223	0.640807
CAGAGAAAGTC	GACTTTCTCTG	-0.19615	-0.038346	-1.51074	-0.062498	0.078938	0.260698
AAATAAAATTC	GAATTTTATTT	-0.241909	0.472767	-1.49968	0.941453	0.018707	-0.175292
CAAGTTTATTG	CAATAAACTTG	0.616644	0.084717	0.566041	-1.49354	0.242446	-0.865137
AAACCAACCAA	TTGGTTGGTTT	0.026799	0.41569	-1.48945	0.510344	0.355631	-0.309156
CAATCACTTCA	TGAAGTGATTG	-0.332402	0.636123	-1.48708	0.258983	-0.269305	0.225112
AATGTGTTTGG	CCAAACACATT	1.00318	-0.951971	0.559875	-1.48635	0.553143	-0.903712
CATTTTATTGA	TCAATAAAATG	-0.191764	-0.144423	0.873415	-1.4848	0.119791	-0.427113
ATTAAACCACA	TGTGGTTTAAT	-0.770457	0.24462	-1.48202	0.56986	-0.325286	1.27061
AGCTGGGAAAT	ATTTCCCAGCT	0.63485	-0.087423	-0.518054	-1.47675	-0.490212	-0.356296
AAGTTTATTGT	ACAATAAACTT	0.366496	-0.046809	0.981287	-1.4739	0.743652	-0.67734
AATTTTATTGC	GCAATAAAATT	-0.364202	-0.497812	0.768517	-1.47297	-0.176176	-0.574756
GTGTGTGTGAA	TTCACACACAC	0.694577	-0.018737	0.503201	-1.47192	0.7593	-0.889333
ATTTATTGCTA	TAGCAATAAAT	0.297262	-0.648323	0.546774	-1.46689	-0.021534	-0.597395
GTTGTTGTTGA	TCAACAACAAC	0.059288	-0.885155	0.927018	-1.46669	0.043664	0.354824
AAACACATTTA	TAAATGTGTTT	-0.818221	0.993011	-1.46135	0.11843	-0.161084	0.14479
ATTCACACACA	TGTGTGTGAAT	0.117353	0.824022	-1.45618	0.321542	-0.745483	0.925465
AATCCACAAAC	GTTTGTGGATT	-0.353378	0.596076	-1.4549	0.209276	-0.415888	0.50419
CTTAAACCACA	TGTGGTTTAAG	-0.690422	0.096261	-1.45312	0.384884	-0.372948	0.919034
GATCCACAAAC	GTTTGTGGATC	0.157606	0.310929	-1.45285	0.0666	-0.01368	-0.076604
AGTTTATTGGG	CCCAATAAACT	0.775409	-0.560258	0.964304	-1.44721	0.762902	-0.667508
CATCCATCCAC	GTGGATGGATG	-0.231778	0.182331	-1.4452	-0.414899	0.270094	0.182521
AAACAATAAAC	GTTTATTGTTT	-0.564235	-0.577175	-1.44015	0.644352	-0.060849	0.192776
CAAATTTTACA	TGTAAAATTTG	-0.077885	0.021943	-1.43888	0.171813	0.183258	-0.560468
ATAAACTTTCA	TGAAAGTTTAT	-0.138882	-0.042479	-1.43818	0.464439	0.206378	0.154659
ACCAACAAACT	AGTTTGTTGGT	0.207855	0.568169	-1.43737	0.322968	-0.082569	-0.032966
AAACAATAAAT	ATTTATTGTTT	-0.829485	0.013155	-1.4356	0.667886	-0.29971	-0.229977
GGTGTGTGGAA	TTCCACACACC	0.973112	-0.659287	0.461934	-1.43258	0.343918	0.028367
AGAGATTTAAG	CTTAAATCTCT	-0.021783	0.340216	-1.43179	-0.138894	-0.500302	-0.064843
AGTGTGTGGAA	TTCCACACACT	0.523579	-0.653514	0.606803	-1.43168	0.619924	0.04362
TAAACAATAAA	TTTATTGTTTA	-1.03911	-0.231998	-1.42932	0.433438	-0.302772	-0.170844
AAAACACTAAA	TTTAGTGTTTT	-0.336453	0.325841	-1.42856	-0.240532	0.167905	0.136646
ACAAAACACAG	CTGTGTTTTGT	-0.601238	0.895886	-1.42825	0.809035	-0.39892	-0.080845
AATGTGTTTGT	ACAAACACATT	0.62448	-1.19861	0.672019	-1.42778	0.679448	-0.979393
CTGGACTTTTA	TAAAAGTCCAG	0.846195	-0.36329	-0.200909	-1.42562	0.896374	0.244232
AATCAATAAAA	TTTTATTGATT	-1.00368	-0.066321	-1.41985	0.475436	-0.393669	0.26115
GATTTTATTGA	TCAATAAAATC	0.186242	-0.351174	0.678936	-1.41976	0.131147	-0.634739
ACTTCCCCCTC	GAGGGGGAAGT	-0.703351	0.156132	-1.4175	-0.043222	0.101563	-0.32926
AAATTTAACAA	TTGTTAAATTT	-0.299327	0.362181	-1.41545	0.102214	0.077015	0.65305
AAAAAGTAGAG	CTCTACTTTTT	-0.41673	0.509166	-1.41375	0.132991	0.052385	0.217949
TTCAACCACAA	TTGTGGTTGAA	-0.357736	0.911444	-1.41128	0.218047	-0.27509	0.723514
TCAATAAAACA	TGTTTTATTGA	0.021578	0.330587	-1.41063	0.141721	-0.280822	0.863862
CAAATTTATTG	CAATAAATTTG	0.362442	-0.39734	0.82412	-1.40939	0.229655	-0.47392
TATCAATAAAA	TTTTATTGATA	-1.10416	0.416824	-1.40886	1.12456	-0.787602	0.476934
AGTTTGTTGGG	CCCAACAAACT	0.703185	-0.158604	0.354551	-1.40595	0.461273	-0.203524
AAAACAATAAA	TTTATTGTTTT	-0.941079	-0.263696	-1.40537	0.200369	-0.310155	-0.381861
CAATCCACACA	TGTGTGGATTG	-0.989714	0.367822	-1.40474	0.442254	-0.359624	-0.002153
AAAAACATTAA	TTAATGTTTTT	-0.537294	0.416259	-1.40224	0.642628	-0.626876	-0.225277
AAGTCTTTTGG	CCAAAAGACTT	0.280689	-0.146778	0.129241	-1.39929	-0.141919	-0.077622
GGTGTGTGGAC	GTCCACACACC	0.96866	-0.361135	0.54054	-1.39745	0.239842	-0.034943
CAAACACTTTA	TAAAGTGTTTG	-0.237536	0.466448	-1.39711	0.360526	-0.037293	-0.136465
AGTGTGTGGAC	GTCCACACACT	0.519127	-0.355361	0.685409	-1.39655	0.515849	-0.019689
CCAATAAACTC	GAGTTTATTGG	-0.351085	0.4678	-1.39608	0.789405	-0.570071	0.400634
AATGTGTTTGA	TCAAACACATT	0.99705	-0.412708	0.473812	-1.39479	0.442162	-0.653968
CAATAAATTTA	TAAATTTATTG	-0.042881	0.498875	-1.39463	0.47286	0.022389	0.059249
ACAATAAAACA	TGTTTTATTGT	-0.253668	0.066294	-1.39447	0.239294	-0.066115	0.539923
GTTGGTGTTGA	TCAACACCAAC	0.650457	-0.750701	1.06662	-1.39419	-0.470515	0.286795
AAAAAACATTT	AAATGTTTTTT	-0.502424	0.144977	-1.39413	0.967982	-0.422329	-0.422497
CTTTAAAACAA	TTGTTTTAAAG	0.22733	0.305205	-1.39387	0.149777	0.062249	0.624745
GTGGAAGTTTA	TAAACTTCCAC	0.446346	-0.138882	0.04431	-1.39285	0.676914	0.077104
AAAGTTTATTG	CAATAAACTTT	0.325803	-0.051181	0.847453	-1.392	0.399095	-0.877108
ATGGATGGATG	CATCCATCCAT	0.148342	-0.397617	-0.334753	-1.39188	-0.200851	0.299729
CTTCACACACA	TGTGTGTGAAG	-0.230432	0.734657	-1.39163	0.372911	-0.996989	0.874589
AGACATTTAAG	CTTAAATGTCT	0.167947	0.406032	-1.39047	-0.502877	-1.02553	0.062454
GAGGGGGAAGC	GCTTCCCCCTC	0.465832	-0.850567	0.035684	-1.39037	-0.776449	0.016407
CTCCACACACC	GGTGTGTGGAG	-0.256303	0.759355	-1.39024	0.558753	0.061317	0.279976
TAAACCACAAA	TTTGTGGTTTA	-0.569842	0.36871	-1.39004	0.247248	-0.490078	0.489844
GAGACAATAAA	TTTATTGTCTC	-0.396247	-0.084132	-1.3894	0.282971	-0.425413	0.588905
AGTGTGTGGAG	CTCCACACACT	0.309823	-0.25053	0.703623	-1.38934	0.555983	0.07657
GTGTGTGGATA	TATCCACACAC	0.71722	-0.267864	0.619979	-1.38889	0.359684	-0.294164
AAAGCCACATG	CATGTGGCTTT	0.233846	0.494808	-1.38882	0.989244	-0.282106	0.299882
CTTCCCCCTCA	TGAGGGGGAAG	-0.913137	0.303984	-1.38843	0.099508	0.168737	-0.252989
ATGTGTGTGAA	TTCACACACAT	0.721578	-0.055361	0.400088	-1.38776	0.588544	-0.753012
AACTTCCCCCT	AGGGGGAAGTT	-0.302053	0.362001	-1.38717	0.153329	0.298687	0.012034
TAACATTAATA	TATTAATGTTA	-0.597003	0.597127	-1.38705	0.574778	-0.33228	-0.099354
GAATCCACACA	TGTGTGGATTC	-1.04858	0.390383	-1.38634	0.63447	-0.417178	0.129624
CTGGACTTTTC	GAAAAGTCCAG	0.936274	-0.416848	-0.156551	-1.38626	0.437421	0.246979
AAATAAACTTG	CAAGTTTATTT	0.166017	0.939893	-1.38535	0.460519	-0.401017	0.04614
AAATGTTTTTG	CAAAAACATTT	0.047339	-0.279153	0.800607	-1.38421	0.134014	-0.750846
AAAAAAATATT	AATATTTTTTT	-0.746638	0.478284	-1.38269	0.327112	-0.181912	-0.837264
CCAACACCAAC	GTTGGTGTTGG	-0.503381	0.695227	-1.38145	0.803529	0.347593	-0.191046
AAGCAATAAAT	ATTTATTGCTT	-0.664172	-0.126185	-1.38055	-0.010356	-0.56888	-0.065181
AAGTTTATTTG	CAAATAAACTT	1.07103	-0.142323	0.488615	-1.38041	0.193324	-0.285161
AACTATAAACA	TGTTTATAGTT	0.283069	-0.592242	-1.38029	0.312611	-0.52653	0.284357
AAAACATTAAA	TTTAATGTTTT	-0.827411	0.392842	-1.38016	0.518276	-0.64564	-0.056707
AGCAAAATAAA	TTTATTTTGCT	-0.832245	0.730757	-1.37954	-0.001539	-0.624934	-0.099507
CAGTTTATTGG	CCAATAAACTG	0.268986	-0.353896	0.739471	-1.37803	0.472219	-0.680955
TCCACACACAA	TTGTGTGTGGA	-0.506478	1.2459	-1.37682	0.865844	-0.167236	0.879623
GTGGTTGGTTA	TAACCAACCAC	0.335964	-0.35648	0.619118	-1.37564	-0.452034	0.366113
AAGTTTATTGA	TCAATAAACTT	0.536909	-0.127817	0.465976	-1.37534	0.503584	-0.952666
CAAAACACAGA	TCTGTGTTTTG	-0.437847	0.751013	-1.37255	0.629964	-0.089339	-0.03249
CAATAAACTTC	GAAGTTTATTG	0.13747	0.723167	-1.37214	0.762169	-0.735008	0.600897
CAACCAACCAA	TTGGTTGGTTG	0.028188	0.427692	-1.37052	0.50293	0.59864	-0.501965
GTGGACTTTTA	TAAAAGTCCAC	0.563491	-0.516782	-0.447978	-1.37044	1.13718	-0.290942
GATCCACACAC	GTGTGTGGATC	-0.222151	0.589581	-1.36965	0.442354	-0.244169	0.432445
ATCACTAAAAC	GTTTTAGTGAT	-0.41477	-0.207762	-1.36949	0.221027	-0.77636	0.96961
GAATCACACAA	TTGTGTGATTC	-0.565053	0.574542	-1.36931	0.788384	-0.693766	-0.133933
CAACCACAACA	TGTTGTGGTTG	-0.43437	0.187464	-1.36898	0.347359	-0.08031	0.058243
TAAAACACTAA	TTAGTGTTTTA	-0.484982	0.361414	-1.36894	-0.135295	-0.135702	0.149446
AAACACACTTA	TAAGTGTGTTT	-0.879787	0.692375	-1.36887	0.047087	-0.516595	0.183431
CTCCAAATAAA	TTTATTTGGAG	-0.745983	0.64085	-1.36884	0.066969	-0.466873	0.408054
ATATCTTTTTG	CAAAAAGATAT	0.469313	-0.149786	0.404251	-1.36877	-0.425121	-0.632694
AAGGAAAAGTA	TACTTTTCCTT	-0.496794	-0.10301	-1.36872	0.154819	0.632511	-0.324036
CCCCAAACCCC	GGGGTTTGGGG	-0.479715	0.511813	-1.36806	0.348477	-0.142493	-0.59317
ATGTGGATGGA	TCCATCCACAT	0.586626	0.301234	0.200888	-1.36671	0.512467	-0.363956
TAAATCATTAA	TTAATGATTTA	-0.655449	0.341288	-1.36482	0.350557	-0.583026	-0.598475
CAAAACACAGC	GCTGTGTTTTG	-0.150333	0.447435	-1.36421	1.09823	-0.066302	-0.032622
CTGAAACCACA	TGTGGTTTCAG	-0.433472	-0.160819	-1.36399	0.293706	0.152316	0.177049
AACCAACAAAC	GTTTGTTGGTT	0.214783	0.462669	-1.36381	0.114677	-0.060406	-0.326582
AAATTTTATTG	CAATAAAATTT	-0.181218	-0.557413	1.19165	-1.36346	0.286897	-0.862408
AATCCACACAG	CTGTGTGGATT	-0.788416	0.289817	-1.36284	0.54687	-0.49405	0.103423
AAGTGTTTTGG	CCAAAACACTT	0.819715	-0.861775	0.694927	-1.36225	0.191241	-0.407775
ATTGTGGTTTA	TAAACCACAAT	0.360537	-0.899746	0.381597	-1.36217	0.595634	-0.675107
AAGTGTTCTGG	CCAGAACACTT	-0.202138	-0.081765	0.500984	-1.36158	-0.288246	-0.375836
ATCCACACACG	CGTGTGTGGAT	-0.322862	0.673606	-1.35911	0.280214	-0.171055	0.619813
CTGAAAGTTTA	TAAACTTTCAG	-0.375091	-0.204887	-0.003051	-1.35907	0.23684	0.335419
TCTAAACCACA	TGTGGTTTAGA	-0.779178	0.262925	-1.35823	0.340525	-0.519167	0.36053
AAATCACACAA	TTGTGTGATTT	-0.685836	0.709448	-1.35807	0.672354	-0.740557	-0.057632
CTAAATCACTA	TAGTGATTTAG	-0.224245	0.421621	-1.35799	0.061464	-0.52164	-0.370775
TCACTAAAACA	TGTTTTAGTGA	0.013252	-0.130893	-1.3574	0.241848	-0.820636	0.91759
GGTTTTAGTGA	TCACTAAAACC	0.251932	-0.033477	0.25836	-1.35711	0.625966	-0.486295
ACTAAACCACA	TGTGGTTTAGT	-0.623851	0.288899	-1.3567	0.189365	-0.552454	0.393372
CAATAAAGTTC	GAACTTTATTG	-0.441614	0.312045	-1.35654	1.02141	-0.608348	0.555934
AAGAGAAAGCC	GGCTTTCTCTT	0.37696	-0.187313	-1.35531	0.159894	-0.088822	0.529527
TAAATGTGTTA	TAACACATTTA	0.602691	-0.365329	-0.279473	-1.35405	0.383948	0.153032
ATATGTTTTTG	CAAAAACATAT	0.594961	-0.363831	0.315517	-1.35307	-0.136118	-0.789355
ACTTTCTCTGC	GCAGAGAAAGT	-0.243098	-0.192798	0.022843	-1.35274	0.571999	-0.035225
AATCACTAAAA	TTTTAGTGATT	-0.591221	-0.064736	-1.35267	-0.216061	-0.632556	0.77185
AATCAACCAAA	TTTGGTTGATT	-0.722545	0.497347	-1.35211	0.067086	-0.482419	-0.232862
CAGAGAAAGTA	TACTTTCTCTG	-0.167543	-0.264575	-1.35146	-0.055821	-0.043203	0.242542
AAAAACATTTA	TAAATGTTTTT	-0.278663	-0.095834	-1.35099	0.821549	-0.32029	-0.341253
CCATCCATCCA	TGGATGGATGG	-0.277985	0.050568	-1.35093	-0.370469	0.507172	-0.521976
AGTGTTTTGGG	CCCAAAACACT	1.04716	-0.676183	1.05834	-1.34813	-0.012111	-0.747065
AGTGTGTGTGG	CCACACACACT	0.776377	-0.441832	1.06914	-1.34798	0.289347	-0.244797
CGAGGTCAGGA	TCCTGACCTCG	0.125547	-0.229305	0.360517	-1.34778	-0.081199	0.361962
AAACAATAAAG	CTTTATTGTTT	-0.904539	-0.034837	-1.34735	0.781736	-0.05023	-0.269304
AATTTTATTTA	TAAATAAAATT	0.823103	-0.035808	0.808918	-1.34574	0.065681	0.122059
ATCAGTAAAAT	ATTTTACTGAT	-0.540165	0.285491	-1.34558	0.506808	-0.546144	0.606445
AATGTGGTTGG	CCAACCACATT	1.05651	0.299448	0.225784	-1.34557	-0.010445	-1.08247
CTGTGTTTTGA	TCAAAACACAG	0.933655	-0.550802	0.795833	-1.34553	-0.077398	0.141197
AATCCACACAT	ATGTGTGGATT	-1.00669	0.717323	-1.34548	0.60522	-0.430397	-0.213522
CAATAAAATTA	TAATTTTATTG	-0.507385	0.090851	-1.34476	0.483245	-0.358936	-0.567162
GTTGTGGTTGA	TCAACCACAAC	0.261001	-0.447767	0.240003	-1.34461	0.298947	-0.104841
CTGTGGTTGAA	TTCAACCACAG	0.966376	-0.214465	0.294683	-1.34428	0.869249	-0.196459
AAAAAAGATAT	ATATCTTTTTT	-0.845993	0.445477	-1.34303	-0.070452	-0.149055	-1.04377
CAACACCAACA	TGTTGGTGTTG	-0.568958	0.89165	-1.34268	1.16903	0.127133	-0.227121
CTTAAATCTCA	TGAGATTTAAG	0.096774	-0.257881	-0.416054	-1.3416	-0.024612	-0.27134
TAATGATTTAA	TTAAATCATTA	-0.05038	-0.256585	-0.071954	-1.34159	0.032459	-0.014216
AATGTGTTTGC	GCAAACACATT	0.828532	-0.887967	0.31227	-1.34137	0.805532	-0.414602
TTCAACATCAA	TTGATGTTGAA	-0.488443	0.18999	-1.34112	0.326473	-0.397269	0.243027
ACACCACCAAA	TTTGGTGGTGT	-0.28224	0.739679	-1.34087	0.539272	0.815832	0.373335
ATCCATCCACA	TGTGGATGGAT	-0.023413	0.360848	-1.33957	-0.099889	-0.086248	0.627849
TAAACCACAGA	TCTGTGGTTTA	-0.023298	-0.049486	-1.33873	0.132802	-0.393955	0.617837
CTTCAACCACA	TGTGGTTGAAG	-0.357029	0.827461	-1.33864	0.227731	-0.343152	0.693577
CATCCACACAC	GTGTGTGGATG	-0.226852	0.761949	-1.33851	0.266488	-0.390081	0.204133
TAAATCACTAA	TTAGTGATTTA	-0.387252	0.564063	-1.33848	0.068184	-0.560469	-0.118243
CTAAACCAAAA	TTTTGGTTTAG	-1.10746	-0.204965	-1.33752	0.092985	-0.661893	0.39283
GGCCTTTTCTA	TAGAAAAGGCC	0.339609	0.237326	0.37843	-1.33745	0.656657	-0.141683
GAAAACATTAA	TTAATGTTTTC	-0.451939	0.082365	-1.3371	0.304512	-0.745211	0.201592
GTGAAAGTTTA	TAAACTTTCAC	-0.028713	-0.314804	0.222752	-1.33701	0.28655	0.143993
CAAATAAAAGA	TCTTTTATTTG	-0.839319	0.989192	-1.33671	0.654353	-0.192652	0.396662
TCCATGCCCAA	TTGGGCATGGA	-0.417238	1.0254	-1.33582	0.061812	0.227101	0.080817
GTTCACACACA	TGTGTGTGAAC	-0.167291	0.779269	-1.33506	0.230894	-0.767046	0.624613
AAAGGCAAAGT	ACTTTGCCTTT	-0.503937	0.201868	-1.33492	0.522351	0.298207	-0.185403
AAATTTATTGC	GCAATAAATTT	0.131144	-0.391187	1.03337	-1.33458	0.47702	-0.229311
AACCAACCAAC	GTTGGTTGGTT	0.192395	0.277673	-1.33364	0.57014	0.333559	-0.591435
AAATCACTCAA	TTGAGTGATTT	-0.279658	0.006436	-1.33361	0.26934	-0.925866	-0.205758
AAGCTGGGAAA	TTTCCCAGCTT	0.421327	-0.20816	-0.373776	-1.33359	-0.625398	-0.190153
AATCACTCAAA	TTTGAGTGATT	-0.401513	-0.209759	-1.33354	0.253024	-0.650616	-0.003134
AATCCACACAA	TTGTGTGGATT	-1.21682	0.640305	-1.33233	0.676048	-0.767085	0.167175
ACTCTGTGGGG	CCCCACAGAGT	0.02562	-0.034009	-0.23232	-1.33203	-0.380682	-0.286641
AACATCAATAA	TTATTGATGTT	-0.732585	0.265427	-1.33178	0.181324	-0.150086	0.059723
ACCACATCCAT	ATGGATGTGGT	-0.399639	0.965609	-1.33165	0.340011	0.432653	-0.050494
GAAAAGTCCAC	GTGGACTTTTC	-0.57034	0.653571	-1.33107	-0.40362	-0.288195	0.67823
CTGGTCCCAAG	CTTGGGACCAG	-0.470191	-0.187938	-1.33033	0.52156	-0.175761	-0.112982
AAAACATTAAT	ATTAATGTTTT	-0.574973	0.386355	-1.32955	0.108342	-0.94757	0.039262
ATTTTATTGAG	CTCAATAAAAT	0.422418	-0.318743	0.735909	-1.32943	0.060951	-0.633345
GTTTGTGGATA	TATCCACAAAC	0.415911	-0.03402	0.493846	-1.32926	0.183188	-0.129014
GATGTGGTTGA	TCAACCACATC	0.90803	-0.086253	0.398444	-1.32893	0.331422	-0.300564
GAGTGTTGGGC	GCCCAACACTC	-0.053901	-0.188493	0.518755	-1.32812	-0.276701	0.194862
GAGACAAGAAA	TTTCTTGTCTC	0.196008	0.177229	-1.32785	0.149911	-0.63359	-0.165616
GTTAAACCACA	TGTGGTTTAAC	-0.675942	0.106073	-1.32742	0.177718	-0.340764	0.772887
CTATAGTCACA	TGTGACTATAG	-0.682037	0.838662	-1.32632	0.533483	-0.171624	-0.380528
TTCAATAACAA	TTGTTATTGAA	-0.977172	-0.194593	-1.32467	-0.158956	-0.290925	0.392943
AGTGTGTGTGA	TCACACACACT	0.672285	-0.239265	0.888551	-1.32415	0.398046	-0.44905
AAATTTAACAC	GTGTTAAATTT	-0.282257	0.612493	-1.32396	0.23413	-0.045517	0.665026
GAGTGTGTGGA	TCCACACACTC	0.162733	-0.36777	0.677586	-1.32376	0.367936	0.216915
AGTTTGTTTGG	CCAAACAAACT	0.661424	-0.730772	0.400689	-1.32294	0.50743	-0.03242
TAAACAACCAA	TTGGTTGTTTA	-0.540526	0.434515	-1.32277	0.160218	-0.193896	-0.695919
CCCCAACACTC	GAGTGTTGGGG	-0.154934	0.107762	-1.32277	0.515884	0.160069	0.099824
AAACCAACCAC	GTGGTTGGTTT	-0.207199	0.451705	-1.32261	0.679866	0.504115	-0.365547
GCTAAACCACA	TGTGGTTTAGC	-0.650697	0.091306	-1.32232	-0.060641	-0.384554	0.185719
GAACCAACCAA	TTGGTTGGTTC	0.181261	0.206116	-1.32172	0.593327	0.148774	-0.431905
AAAAGTACAGA	TCTGTACTTTT	0.378407	0.088417	-1.32149	0.407152	0.112692	0.517338
ACCAAAAGACT	AGTCTTTTGGT	-0.17218	0.360933	-1.32146	0.665132	0.074031	0.116493
AATATCATTAA	TTAATGATATT	-0.871526	-0.132595	-1.32139	0.684252	-0.272403	-0.042808
CTGTGACTATA	TATAGTCACAG	0.877264	-0.727516	0.535609	-1.32085	-0.373787	-0.355541
GAGCTGGGAAA	TTTCCCAGCTC	0.369285	-0.310816	-0.646224	-1.32032	-0.778621	-0.159117
CTGTGGTTTAC	GTAAACCACAG	0.412302	-0.43814	0.205326	-1.32027	0.452594	-0.161545
GTGTGTTTGGA	TCCAAACACAC	0.764975	-0.700229	0.767532	-1.32001	0.464825	-0.729544
ATTTAAAACAA	TTGTTTTAAAT	0.432879	0.375156	-1.31996	0.188472	0.232047	0.255766
GTGGAAGTCTA	TAGACTTCCAC	0.114698	-0.059723	0.068485	-1.31959	0.221681	-0.061243
AAGTTTATTGC	GCAATAAACTT	0.289763	-0.00274	0.600562	-1.31819	0.452234	-0.7849
ACTGTGTGGGG	CCCCACACAGT	0.806803	-0.220884	0.82516	-1.317	0.20574	-0.45339
AAAACACTAAG	CTTAGTGTTTT	-0.653178	0.442309	-1.31658	-0.265687	-0.315858	0.043176
AATACTTGGGG	CCCCAAGTATT	-0.060804	-0.439768	0.429437	-1.31657	-0.237931	-0.180036
ATGTGGTTGAG	CTCAACCACAT	1.03853	0.113648	0.468448	-1.31648	0.308409	-0.36747
GTAAACCACAA	TTGTGGTTTAC	-0.861356	0.383506	-1.31582	0.099296	-0.332799	0.29978
GAGTGTTGGGA	TCCCAACACTC	0.091131	-0.162728	0.456265	-1.31527	-0.011502	0.432412
CAGTGATTTAG	CTAAATCACTG	0.217146	-0.108572	-0.12808	-1.31517	0.060414	-0.422372
AACTTTATTGC	GCAATAAAGTT	0.118376	-0.637257	0.786319	-1.3147	0.423211	-0.507475
AAAGTTACAAA	TTTGTAACTTT	-0.111906	0.743706	-1.31451	0.546892	0.070906	0.412503
ATAGTGATTTA	TAAATCACTAT	0.264729	-0.109822	0.452173	-1.31429	0.139174	-0.404333
CCAAAAGACTC	GAGTCTTTTGG	-0.030187	0.178045	-1.31303	0.264593	0.064637	-0.012439
AGACATTTAAA	TTTAAATGTCT	0.10296	0.50303	-1.31303	-0.194896	-0.997947	0.304566
AAATTTTACAC	GTGTAAAATTT	-0.320641	0.226989	-1.31224	0.351472	-0.081005	-0.311928
AATTTTATTGG	CCAATAAAATT	0.216557	-0.594483	0.706121	-1.31196	0.000114	-0.961954
ATAAATCATTA	TAATGATTTAT	-0.693277	0.279695	-1.31181	-0.092914	-0.503145	-0.367277
ATTCAACCACA	TGTGGTTGAAT	-0.294993	1.01349	-1.31098	0.130508	-0.224267	0.832537
AAACAATAAAA	TTTTATTGTTT	-0.950704	-0.265423	-1.31039	0.772367	0.172433	0.145701
ATTTATTGCTG	CAGCAATAAAT	0.453028	-0.429731	0.486368	-1.30973	0.319039	-0.764631
GAAATTTAACA	TGTTAAATTTC	-0.025962	0.278392	-1.30898	-0.044091	-0.049174	0.460082
GTTTTATTGAA	TTCAATAAAAC	0.268391	-0.245379	0.373159	-1.30896	0.69496	-0.386146
ATCCACAAACC	GGTTTGTGGAT	-0.162562	0.522331	-1.3077	0.412247	0.092034	0.172522
CTTTACTTTTA	TAAAAGTAAAG	0.390817	-0.448524	0.587948	-1.30748	1.01388	-0.053141
AAACACTTTAG	CTAAAGTGTTT	-0.441196	0.225639	-1.30603	0.522316	-0.166311	-0.043915
AACTTTATTGG	CCAATAAAGTT	0.085434	-0.645733	0.774175	-1.30556	0.199612	-0.816813
ATCTATGTGGA	TCCACATAGAT	0.670992	-0.334151	0.286335	-1.30554	-0.043617	-0.038591
AGTGTGTTGGG	CCCAACACACT	0.661328	-0.38519	0.757366	-1.30486	0.359981	-0.239356
AGACAATAAAT	ATTTATTGTCT	-0.37668	0.077927	-1.30481	0.438705	-0.205019	0.580245
AAAATGCTAAG	CTTAGCATTTT	0.375704	-0.085619	-1.30473	0.080143	-0.386335	0.07931
TAAACCACACA	TGTGTGGTTTA	-0.945365	0.47544	-1.30384	0.585745	-1.10883	0.214917
TAGACAAGAAA	TTTCTTGTCTA	0.448529	0.098274	-1.30357	-0.055842	-0.628421	-0.137541
ATGGTTGGTTA	TAACCAACCAT	0.134402	-0.341583	0.381142	-1.30333	-0.017589	0.047349
CTTAACCACAA	TTGTGGTTAAG	-0.321604	0.402136	-1.30273	0.017814	-0.296713	0.218678
CAAAACAAAGC	GCTTTGTTTTG	-0.454012	0.419503	-1.30245	1.05064	-0.110678	0.482041
AGTGAATATAG	CTATATTCACT	0.415626	-0.111028	0.30544	-1.30182	-0.353059	0.050535
AACTTTATTGA	TCAATAAAGTT	0.432905	-0.82723	0.558231	-1.30138	0.418597	-0.934512
CAAACACATTA	TAATGTGTTTG	-0.580194	1.08779	-1.2999	0.640113	-0.576438	0.165652
AATGTGGCTGT	ACAGCCACATT	0.897679	0.073413	0.013341	-1.2996	0.108092	-0.39775
AAGTTTGTTGG	CCAACAAACTT	0.691837	0.459244	0.25016	-1.29951	0.015169	-0.623469
ACAAAACACAC	GTGTGTTTTGT	-0.897344	1.0702	-1.29868	0.788073	-0.488929	-0.322529
AACCAACCAAG	CTTGGTTGGTT	0.19552	0.197289	-1.29854	0.23366	0.243618	-0.582578
TTAAACAACAA	TTGTTGTTTAA	-0.937013	0.150382	-1.29842	0.609703	-0.11856	0.446482
CAATAAAACAA	TTGTTTTATTG	-0.238934	0.624906	-1.29836	-0.070043	-0.18323	0.327046
CAAATGGGGCA	TGCCCCATTTG	0.388443	0.084695	0.095771	-1.2975	0.14998	0.654736
AGTGAATATAT	ATATATTCACT	0.387389	-0.239483	0.237527	-1.29721	-0.327522	0.272948
AGTTTGTTGGA	TCCAACAAACT	0.999791	-0.345692	0.451431	-1.2967	0.060615	-0.035277
CTTTTATTTAA	TTAAATAAAAG	0.886743	-0.768692	0.640307	-1.29642	0.916611	-0.355597
GTGTTTGTGGA	TCCACAAACAC	1.23492	-0.438366	1.19738	-1.29565	0.044292	-0.294781
ATTGTTTTAAA	TTTAAAACAAT	0.007936	0.432458	0.040102	-1.29556	0.507408	0.337067
ATAAATCACTA	TAGTGATTTAT	-0.153861	0.287818	-1.29445	0.147672	-0.397471	0.214573
AAATTTATTGA	TCAATAAATTT	0.654692	-0.304369	0.93826	-1.29432	0.384049	-0.506677
GTAAATCACTA	TAGTGATTTAC	0.103774	0.447621	-1.29428	0.34021	-0.417704	-0.090829
TAAACCACCAA	TTGGTGGTTTA	-0.332507	0.311074	-1.29415	0.241318	-0.037573	0.187261
ACAATAAACTA	TAGTTTATTGT	-0.044999	0.354127	-1.29376	1.01056	-0.272889	1.11843
ATGAAAGTTTA	TAAACTTTCAT	-0.160447	-0.097085	0.172956	-1.29296	0.213279	0.09309
GTGTATATATA	TATATATACAC	0.122628	-0.382719	-1.29267	0.266512	-0.2546	1.03441
AAAAGTAAAGA	TCTTTACTTTT	-0.605459	0.15514	-1.29247	0.270361	-0.34752	0.645109
ATGTTTTATTG	CAATAAAACAT	0.700045	-0.596272	0.188995	-1.29246	0.836589	-0.505216
GAGTTGGGAGA	TCTCCCAACTC	-0.090377	-0.072296	-0.461255	-1.29177	0.012604	-0.350988
CAAATGCAAAG	CTTTGCATTTG	-0.132047	-0.016844	-1.29158	0.416445	-0.882545	-0.280166
CCAATAAATTA	TAATTTATTGG	-0.592044	0.733087	-1.29141	0.83482	-0.14655	0.532074
CAACAACAACA	TGTTGTTGTTG	-0.813847	0.588965	-1.29089	0.883178	0.459275	-0.096514
ACCAAAACACA	TGTGTTTTGGT	-0.757351	1.08108	-1.29061	0.962901	-0.458753	0.108593
TACTATAAACA	TGTTTATAGTA	0.218474	-0.194939	-1.29041	0.139087	-0.166508	0.417516
ACTGTGTGTGG	CCACACACAGT	0.592839	-0.135638	0.696275	-1.28994	0.652791	-0.631047
AGTGTGTTTGG	CCAAACACACT	0.930521	-0.781664	0.835215	-1.28981	0.534522	-0.384444
AACCAACCAAT	ATTGGTTGGTT	-0.042562	0.274456	-1.28964	0.300033	0.160204	-0.587965
CCCATTTCCCA	TGGGAAATGGG	0.004861	0.862397	-1.28935	0.28874	-0.000845	-0.014699
AAGCCACATGT	ACATGTGGCTT	0.094527	0.45493	-1.28848	0.98252	0.064889	0.215692
AAATATCATTA	TAATGATATTT	-0.718728	0.01851	-1.28837	1.03541	-0.133404	-0.04394
CAAACACTAAA	TTTAGTGTTTG	-0.276644	0.234717	-1.28793	-0.203115	0.193615	0.368013
AAATGTGTAAA	TTTACACATTT	0.301035	-0.377396	-0.053479	-1.28747	1.16993	-0.269689
GAAATAAAAGA	TCTTTTATTTC	-1.11006	0.992477	-1.28738	0.647253	-0.1533	0.407634
AGTTTGTGGAT	ATCCACAAACT	0.469031	0.055571	0.317905	-1.28703	0.292473	0.129615
TAACCAACAAA	TTTGTTGGTTA	-0.285287	0.253136	-1.28677	0.063056	-0.101406	-0.368178
GAGATTTAAGC	GCTTAAATCTC	0.075566	0.067017	-1.28652	0.002955	-0.214781	-0.071733
TTCAACAACAA	TTGTTGTTGAA	-0.655575	0.22379	-1.28621	0.878074	-0.106027	0.455999
AAGACATTTAA	TTAAATGTCTT	0.227633	0.302528	-1.28613	-0.278958	-0.864546	0.058474
AAAACATTAAG	CTTAATGTTTT	-0.585209	0.182956	-1.28603	0.305944	-0.943713	0.135001
AAGTGTGTTTG	CAAACACACTT	0.998132	-0.979785	0.521707	-1.28573	0.390949	-0.25406
AATCCAAACAC	GTGTTTGGATT	-1.02446	0.946534	-1.28546	0.230028	-0.382849	0.567696
TCCTTGGAAAA	TTTTCCAAGGA	0.050962	0.27374	-1.28546	0.098581	-0.359803	-0.290461
AGTGTTTTGGA	TCCAAAACACT	1.12305	-0.817446	0.914036	-1.28493	0.269364	-0.670105
CACCAAAACCA	TGGTTTTGGTG	-0.383639	0.639034	-1.28476	0.867674	-0.637711	0.601348
CTAAACAACAA	TTGTTGTTTAG	-1.05511	0.289859	-1.28467	0.330216	-0.172175	0.078377
GAGGTCAGGAA	TTCCTGACCTC	-0.274519	-0.346974	0.677517	-1.28453	-0.397017	0.411304
ACAACAACAAC	GTTGTTGTTGT	-0.633011	0.084038	-1.28441	0.776943	0.199127	-0.146788
AATTTATTGGT	ACCAATAAATT	0.11194	-0.597181	0.825358	-1.28428	0.144625	-0.460262
TAATCACACAA	TTGTGTGATTA	-0.547619	0.59156	-1.28423	0.939073	-0.671526	-0.212551
AAAGTTTATTT	AAATAAACTTT	0.64857	0.030096	0.741378	-1.28285	0.202637	-0.412681
GATTTTACTGA	TCAGTAAAATC	-0.207255	-0.246975	0.39959	-1.28249	0.598989	-0.426822
GTTTATTGCTA	TAGCAATAAAC	0.117074	-0.655187	0.255439	-1.28241	0.015088	-0.602695
ACCAAAACACT	AGTGTTTTGGT	-0.841757	0.830413	-1.28178	0.791532	-0.618774	0.165267
CCTTCCCTTCC	GGAAGGGAAGG	0.034344	-0.49495	0.198086	-1.28139	0.406432	-0.508239
CTACAGAGAAC	GTTCTCTGTAG	0.542691	-0.335606	-1.28111	0.371462	-0.022702	0.380509
GTTGATGTTGA	TCAACATCAAC	0.261644	-0.27689	0.663193	-1.28093	0.163744	0.097995
AAATTTAACAG	CTGTTAAATTT	-0.29502	0.205683	-1.2809	0.092156	-0.013174	0.682664
AGCAAAATAAG	CTTATTTTGCT	-0.560739	0.639614	-1.28057	-0.016535	-0.59005	-0.062001
TGAAACCACAA	TTGTGGTTTCA	-0.056634	0.410576	-1.28034	0.433387	-0.09294	0.53414
AGTTGTTGTTG	CAACAACAACT	0.149865	-0.975092	0.745534	-1.28008	0.088526	0.349294
CAAAACACAGG	CCTGTGTTTTG	-0.215388	0.786276	-1.27929	0.994595	-0.207833	-0.168526
TGTGTGTGAAA	TTTCACACACA	0.744695	-0.280055	0.09433	-1.279	0.779893	-0.819058
GTAAACTTTCA	TGAAAGTTTAC	0.125307	0.034129	-1.27893	0.021475	0.464497	0.227499
AAAAAGTATAC	GTATACTTTTT	-0.435039	0.34346	-1.27879	-0.194332	-0.023422	-0.058284
ACTTTTATTTG	CAAATAAAAGT	1.05161	-0.70269	0.454299	-1.27878	0.771736	-0.46342
CAATAACACAA	TTGTGTTATTG	0.043475	0.449435	-1.2784	0.031633	-0.277459	0.551577
GTGAAATTTGA	TCAAATTTCAC	0.080069	-0.753178	0.214383	-1.2783	0.00304	-0.382943
AAAACACTTTA	TAAAGTGTTTT	-0.177778	0.098537	-1.27766	0.566568	-0.024932	-0.131603
CATCCATCCAA	TTGGATGGATG	-0.507688	0.329384	-1.27755	-0.559521	-0.03092	0.100337
GCTTGGGACCA	TGGTCCCAAGC	-0.454215	-0.543946	0.257702	-1.2775	-0.163833	-0.118245
ATCTGTGTGGA	TCCACACAGAT	0.428937	-0.434115	0.749551	-1.2774	0.554863	-0.183466
AAATCATACAA	TTGTATGATTT	-0.761944	0.788285	-1.27735	0.559105	-0.198032	-0.246507
AATTTATTGCT	AGCAATAAATT	0.110296	-0.424446	0.742908	-1.27665	0.368743	-0.326114
ATGGATGTGGA	TCCACATCCAT	0.568568	-0.100623	0.25616	-1.27634	-0.243837	0.338582
AAAATTGGACA	TGTCCAATTTT	0.757903	0.165616	-0.476392	-1.27592	0.40329	-0.736034
CTGTGTGTGAA	TTCACACACAG	0.593818	-0.137514	0.139907	-1.27547	0.926772	-0.88986
GATCCATAAAA	TTTTATGGATC	-0.409207	-0.027752	-1.27524	-0.067097	-0.359105	0.271635
AGTTTATTGGC	GCCAATAAACT	0.31746	-0.355399	0.790763	-1.27504	0.520638	-0.361659
GGGGGAAGTTA	TAACTTCCCCC	0.585818	0.104289	0.108521	-1.27484	0.02734	0.587937
CCTTCCCCCTC	GAGGGGGAAGG	-0.864517	0.167487	-1.27458	-0.096029	0.412859	-0.370089
AAAAGCACAGG	CCTGTGCTTTT	0.451184	0.429259	-1.27397	0.75462	-0.244657	0.495114
GTCCATGCCCA	TGGGCATGGAC	-0.440611	0.592589	-1.27386	0.432155	0.365011	0.13527
ACAATAAAATA	TATTTTATTGT	-0.363613	0.551606	-1.27324	1.05724	-0.408439	0.533622
ACAACACAGAG	CTCTGTGTTGT	-0.831522	-0.10499	-1.27319	0.274958	-0.599528	0.087066
AAATTAAAAGT	ACTTTTAATTT	-0.81877	0.382737	-1.27247	0.400721	0.221861	0.844548
AAGGAAAAGTC	GACTTTTCCTT	-0.371614	-0.06611	-1.27162	0.186347	0.42313	-0.319323
ATTGATGTGGA	TCCACATCAAT	0.634166	-0.409157	0.705443	-1.27148	0.036475	0.358741
ATATATGTGGA	TCCACATATAT	1.20529	-0.856293	-0.029495	-1.27143	-0.160456	-0.278758
AAACACTTTAC	GTAAAGTGTTT	-0.36749	0.319101	-1.27064	0.534227	-0.088024	-0.228818
GGTTTTATTGA	TCAATAAAACC	0.081975	-0.325701	0.328188	-1.27001	0.763957	-0.277219
ATGTGTTTGGA	TCCAAACACAT	0.814083	-0.866116	0.685763	-1.26979	0.572213	-0.84784
CACATCAATAA	TTATTGATGTG	-0.759609	0.254512	-1.26972	0.437893	-0.03431	-0.067486
GTTTATTTGGA	TCCAAATAAAC	1.10432	-0.858068	0.322572	-1.26918	0.506758	-0.385236
AGACATTTAAC	GTTAAATGTCT	0.13178	0.386976	-1.26892	-0.595107	-0.921889	0.216784
ATTCACCCACA	TGTGGGTGAAT	0.017176	0.689491	-1.26857	0.134856	-0.380004	0.660169
AAAAGTTTACA	TGTAAACTTTT	-0.580246	0.452809	-1.26828	-0.187051	-0.010945	0.628055
CATTAAAGTTC	GAACTTTAATG	-0.147979	-0.083985	-1.26808	-0.06684	-0.383146	0.305272
AAAGCCACATT	AATGTGGCTTT	0.152289	0.707765	-1.26801	0.632206	-0.239833	0.019994
CCCAAACCACA	TGTGGTTTGGG	-0.53354	0.468504	-1.26753	0.320823	-0.348577	-0.33103
AATCACTTCAG	CTGAAGTGATT	-0.555574	0.850216	-1.26708	0.42347	-0.695588	-0.284433
CCAACCACATC	GATGTGGTTGG	-0.074795	0.628701	-1.2665	0.315364	-0.498328	0.288853
TTAAACAATAA	TTATTGTTTAA	-0.707003	0.219032	-1.26632	0.569556	-0.295238	-0.122062
CAATCAAACAA	TTGTTTGATTG	-0.18641	0.691202	-1.26631	0.084115	-0.242837	0.011683
ACTGTGGTTTA	TAAACCACAGT	0.460878	-0.207539	0.361801	-1.26626	0.63641	-0.434747
AGAAAGATATC	GATATCTTTCT	-0.174856	-0.157014	-1.26626	0.097563	-0.561068	0.229246
AAAAGTAAAGG	CCTTTACTTTT	-0.377599	0.132709	-1.26617	0.44566	-0.183043	0.470543
TCTAAACCAAA	TTTGGTTTAGA	-0.74868	-0.154745	-1.26553	0.421601	-0.174551	0.502953
CTATATTCACA	TGTGAATATAG	-0.268125	0.46611	-1.26547	0.17147	0.286463	-0.440368
CCTTTTATTTA	TAAATAAAAGG	1.05706	-0.85701	0.443097	-1.26519	0.515443	-0.134697
ACTTCCAGACA	TGTCTGGAAGT	-0.336719	0.32419	-1.26495	0.32312	0.237379	0.106874
TAAGCAACCAA	TTGGTTGCTTA	-0.025557	0.186146	-1.26492	0.145358	0.527612	0.20682
GTATACTTCCA	TGGAAGTATAC	-0.20468	-0.082957	-1.26462	0.124287	0.429058	0.066299
CACTAAAACCA	TGGTTTTAGTG	-0.398092	0.203884	-1.26447	0.196724	-0.268848	0.610498
AAAATTTATTG	CAATAAATTTT	0.3004	-0.313093	1.05121	-1.26443	0.536345	-0.817473
AATCCACATAT	ATATGTGGATT	-0.592892	0.608671	-1.26442	0.3874	-0.719773	-0.601
AAATCACTAAA	TTTAGTGATTT	-0.348945	0.468396	-1.26403	-0.365118	-0.512807	0.252469
AAATAAACTTC	GAAGTTTATTT	0.21877	1.04642	-1.26395	0.656646	-0.270888	0.404591
AAATACTTGGG	CCCAAGTATTT	0.367571	-0.236511	0.797451	-1.26379	-0.093898	-0.112662
ACAACACCAAC	GTTGGTGTTGT	-0.686887	0.823811	-1.26373	1.01282	0.129772	-0.096615
ACTTCCCCCTA	TAGGGGGAAGT	-0.520678	0.254537	-1.26316	0.195705	0.275842	-0.101113
TGAAAGTTTAA	TTAAACTTTCA	0.078115	0.316881	-0.045047	-1.26242	0.00147	0.099203
ATAAACAACAA	TTGTTGTTTAT	-1.0041	0.297797	-1.26235	0.733722	0.116403	0.241529
TAGCAATAAAA	TTTTATTGCTA	-0.702427	-0.019182	-1.26218	0.200952	-0.45755	0.222106
GAAATGGGGCA	TGCCCCATTTC	0.532929	-0.301098	0.063817	-1.26191	0.178677	0.55289
GTCTGTGTGGA	TCCACACAGAC	0.064831	-0.31236	0.741269	-1.26183	0.652249	-0.21945
ATGTGTGTGCA	TGCACACACAT	0.358622	-0.465567	0.269739	-1.26177	1.14887	-0.178436
AACTTTAATGC	GCATTAAAGTT	0.013869	-0.101199	0.076824	-1.2617	0.088566	-0.00196
CATCCACAAAC	GTTTGTGGATG	-0.19108	0.533883	-1.26164	0.212318	-0.189801	0.298182
AGGAATTAAAG	CTTTAATTCCT	-0.191984	-0.548569	-1.26154	0.328105	0.197088	0.546635
AATCACTTCAC	GTGAAGTGATT	-0.299371	0.469169	-1.26141	0.209965	-0.598423	0.093225
ATATATTCACA	TGTGAATATAT	-0.39658	0.437874	-1.26085	0.103558	0.508876	-0.41483
CAATAACACAG	CTGTGTTATTG	0.300498	0.662584	-1.2608	0.221166	-0.48586	0.537589
ACATTCACCAC	GTGGTGAATGT	-0.414277	-0.280021	-1.26077	0.588653	-0.000675	-0.041825
AATGTGGCTGG	CCAGCCACATT	0.933588	0.527451	0.156371	-1.26065	0.048696	-0.475915
TAATCACTCAA	TTGAGTGATTA	-0.032393	-0.167517	-1.26062	0.405114	-1.15317	-0.518366
CAATTTTAATG	CATTAAAATTG	0.023057	-0.465194	0.287431	-1.26023	-0.130273	-0.211545
AAAAAAAATTT	AAATTTTTTTT	-0.015105	0.584947	-1.25949	0.589251	-0.144209	-0.398089
CTGTACTTTTA	TAAAAGTACAG	0.076064	0.111122	0.251105	-1.25918	0.510434	0.148115
ACACTAAAACA	TGTTTTAGTGT	-0.016918	-0.129186	-1.25905	0.275428	-0.593699	0.654651
ATGGGACATGG	CCATGTCCCAT	0.670248	-0.335317	0.277263	-1.25877	0.473739	-0.005803
ACACTAAAACC	GGTTTTAGTGT	-0.063647	0.253639	-1.25876	0.291939	-0.259358	0.363027
AAGAAAGATAT	ATATCTTTCTT	0.041831	0.131038	-1.25789	-0.476906	-0.573316	-0.268742
ATTTGGTTTAG	CTAAACCAAAT	-0.026506	-0.50331	0.529928	-1.25782	0.547553	-0.372683
AAATAAAATTA	TAATTTTATTT	-0.181359	0.563247	-1.25753	0.561681	0.211002	-0.82063
CCATTCAACTC	GAGTTGAATGG	-0.318846	-0.24572	-1.25578	0.27516	-0.10615	0.079547
TTCAAAATAAA	TTTATTTTGAA	-0.422894	0.571433	-1.2553	0.563189	-0.821851	0.724546
AGTGATTGGAT	ATCCAATCACT	0.090864	-0.793975	0.255764	-1.25501	0.300929	-0.12351
AGTCTTTTGGA	TCCAAAAGACT	0.471076	-0.071821	0.537433	-1.25473	0.345365	0.130637
AGTTGGCTTGA	TCAAGCCAACT	0.053341	-0.10783	0.434515	-1.25441	-0.45597	0.284303
AATAAATCATT	AATGATTTATT	-0.558885	0.500006	-1.25431	-0.382616	-0.989138	0.090628
CCAACAAACTA	TAGTTTGTTGG	0.066745	0.462546	-1.25428	0.461656	-0.203831	0.268873
GAGACTTCCAC	GTGGAAGTCTC	0.134598	0.093178	-1.25415	-0.090292	-0.120004	-0.018712
CTGTGTGGGGA	TCCCCACACAG	0.799912	-0.419172	0.813878	-1.25401	0.471007	-0.601202
ACAATAAAACC	GGTTTTATTGT	-0.600946	-0.182318	-1.25386	0.425762	-0.062512	0.440017
AGTGGTCTGGG	CCCAGACCACT	0.509178	-0.365	0.376407	-1.25307	-0.824219	0.419799
TAGTGATTTAA	TTAAATCACTA	0.112915	-0.150632	0.037882	-1.25304	-0.079978	-0.41225
ATAACATTAAT	ATTAATGTTAT	-0.395739	0.311602	-1.25266	1.02574	-0.063879	-0.287746
AGACTTCCACT	AGTGGAAGTCT	0.345105	0.179749	-1.25237	-0.525709	-0.120775	-0.055074
AAAAAGATATT	AATATCTTTTT	-0.534792	0.354943	-1.25198	0.27122	-0.193108	-0.59592
ATAAATCACTG	CAGTGATTTAT	-0.038189	0.083343	-1.25163	-0.041872	-0.298204	0.645762
AGCAATAAATC	GATTTATTGCT	-0.660271	-0.065314	-1.25157	0.528338	-0.25061	0.579486
CAGTGATTTAC	GTAAATCACTG	0.243146	0.219446	0.150666	-1.25147	0.34036	-0.318437
ATCCACATATA	TATATGTGGAT	-0.581261	0.895096	-1.25089	0.190877	-0.498003	-0.547831
AAACCAACCAT	ATGGTTGGTTT	-0.192302	0.250143	-1.2503	0.441891	0.185351	0.068898
CAACACCAACC	GGTTGGTGTTG	-0.725602	0.556083	-1.25021	0.979719	0.115592	-0.260765
CATTTAATTGC	GCAATTAAATG	-0.570682	-0.053415	0.246232	-1.24972	0.482316	-0.441944
AGAGTGAGTAA	TTACTCACTCT	0.182104	0.099803	0.027991	-1.24938	-0.487724	-0.187526
AATTTTACTGA	TCAGTAAAATT	0.05538	-0.429259	0.382374	-1.24916	0.761551	-0.239494
AAAGTGTTTGG	CCAAACACTTT	0.597144	-0.459378	0.409166	-1.24817	0.233823	0.085699
ACTGTGTTGGG	CCCAACACAGT	0.569543	-0.253925	0.512499	-1.24777	0.271491	-0.568459
CCTTTGAAAAA	TTTTTCAAAGG	-0.222649	-0.194654	-1.24728	-0.405644	-0.021149	0.163971
CAACAACAACG	CGTTGTTGTTG	-0.540939	0.028002	-1.24687	0.626667	0.182749	-0.083503
AAGCAATCAAT	ATTGATTGCTT	-0.263967	0.176328	-1.24608	-0.090601	-0.347832	0.457593
ATTTTATTGAC	GTCAATAAAAT	0.212432	-0.208293	0.549534	-1.24565	0.72833	-0.69097
CCAAAACAAAG	CTTTGTTTTGG	-0.799044	0.624558	-1.24549	0.899357	-0.231288	0.516361
GAGATTTAAGA	TCTTAAATCTC	0.041707	0.074071	-1.24541	-0.070428	0.302904	-0.257959
CTTCATTAGAC	GTCTAATGAAG	-0.378453	0.290948	-1.2452	0.211408	-0.317727	0.543159
GAAAAGTGCAC	GTGCACTTTTC	-0.215793	0.618105	-1.2451	-0.341244	0.062793	0.241931
AGACTTCCACA	TGTGGAAGTCT	0.070855	0.042051	-1.24507	-0.01118	-0.465211	0.003351
AAATAAATTTG	CAAATTTATTT	-0.229576	0.602006	-1.24502	0.707677	-0.173514	0.33619
GTGGTCTTAGA	TCTAAGACCAC	0.401212	-0.30532	0.216647	-1.24469	0.241928	0.380258
CAGCACTGGGC	GCCCAGTGCTG	0.01795	-0.259474	-1.24431	0.170247	0.325392	0.268109
AAATAAAAGTC	GACTTTTATTT	-0.566618	1.08388	-1.24417	0.130572	-0.291696	0.905515
AGCAAAATAAC	GTTATTTTGCT	-0.545446	0.585699	-1.24384	-0.027538	-0.739523	0.104536
AGCTGGGAAAG	CTTTCCCAGCT	0.494637	0.365098	-0.58214	-1.24365	-0.530605	-0.147473
AGAGTGTTGGG	CCCAACACTCT	0.112008	-0.377705	0.301183	-1.24363	0.207288	0.368719
AAACAACCAAG	CTTGGTTGTTT	-0.25189	0.293255	-1.24342	0.22137	-0.071773	-0.745451
AGGTGTGTGGA	TCCACACACCT	0.791678	-0.432334	0.783834	-1.24334	0.058541	-0.238836
ACAAGCAAACT	AGTTTGCTTGT	-0.583062	0.385284	-1.24317	0.087791	-0.183124	-0.012453
AATTTTTTTTA	TAAAAAAAATT	0.943259	-0.006866	0.260628	-1.24273	-0.220314	-0.223051
ATGTGGTTTAC	GTAAACCACAT	0.357994	-0.5661	0.367552	-1.24268	0.169947	-0.124586
AATCCACATAC	GTATGTGGATT	-0.263899	0.437868	-1.24262	0.301388	-0.587863	0.100699
AACCACAACAA	TTGTTGTGGTT	-0.293961	0.501183	-1.24254	0.504546	-0.322438	0.011982
ATGTTAAATTG	CAATTTAACAT	0.480044	-0.141861	0.428454	-1.24252	0.85344	-0.155084
ATATAGTCACA	TGTGACTATAT	-0.582956	0.813067	-1.24222	0.753936	0.167962	-0.013811
CAAATGCCAAG	CTTGGCATTTG	-0.090209	0.323889	-1.24216	-0.227211	0.200991	-0.281908
CTGTGGTCTAA	TTAGACCACAG	0.295482	-0.866192	0.409922	-1.24163	0.522671	0.342629
AATATCATTAT	ATAATGATATT	-0.384516	-0.300748	-1.24161	0.316874	-0.21322	-0.179099
AGAAAAGGCCA	TGGCCTTTTCT	0.255363	0.254108	-1.24127	-0.225645	0.012213	0.295245
ACTCAAAAACA	TGTTTTTGAGT	0.004124	-0.061493	-1.24048	0.480642	-0.329818	0.57423
ATCCACTCACA	TGTGAGTGGAT	-0.310389	0.198554	-1.24004	0.442244	-0.140675	0.052897
TTAATAAAAAA	TTTTTTATTAA	-0.375007	0.572068	-0.566015	0.790014	0.226208	1.98173
CTTTTTTATTA	TAATAAAAAAG	0.820791	0.088225	1.05496	-0.384612	1.7631	0.296486
GTTAATAAAAA	TTTTTATTAAC	-0.0002	0.322969	-0.730127	0.446518	-0.340563	1.72608
TGGAAGTAAAA	TTTTACTTCCA	-0.228621	0.500158	0.256022	-0.160591	-0.04881	1.66434
AACTTTTATGT	ACATAAAAGTT	0.799434	-0.756821	-0.043537	-0.875835	1.64892	-0.705052
ATTACAATAAA	TTTATTGTAAT	-0.05507	0.650154	-0.623133	0.412953	0.472008	1.61036
ATAATAAAAAA	TTTTTTATTAT	-0.196148	-0.028498	-0.37932	0.783478	0.40529	1.58661
TGAAAGTAAAA	TTTTACTTTCA	0.322026	0.930628	-0.392061	-0.371923	0.433728	1.58061
AAGAAATAACA	TGTTATTTCTT	-0.401992	0.144856	-0.155144	0.125176	-0.236085	1.5674
AGTTAATAAAA	TTTTATTAACT	-0.028666	0.191552	-0.072811	0.118181	-0.354897	1.56038
GTTTTTTATTA	TAATAAAAAAC	0.37805	-0.32289	0.965361	-0.39212	1.55027	0.361194
TCCCACCACCA	TGGTGGTGGGA	0.16918	0.542829	-0.238273	0.472015	1.53225	-0.591124
ATGGACAGGGG	CCCCTGTCCAT	0.958258	-0.488355	0.304346	-0.216815	-0.089177	1.53039
AATATATTACA	TGTAATATATT	-0.022802	-0.156835	-0.070389	0.125234	1.52727	0.626172
GAGAAATAACA	TGTTATTTCTC	-0.161659	0.576088	-0.32392	-0.049664	-0.496253	1.51732
CTAATAAAAAA	TTTTTTATTAG	-0.389367	0.726319	-0.27989	0.683551	0.079899	1.5165
AGAAATAACAA	TTGTTATTTCT	-0.133376	0.689601	-0.647008	-0.040569	0.318885	1.50748
ATTAATAAAAA	TTTTTATTAAT	-0.702903	0.493438	-0.822675	0.831844	-0.046342	1.50593
AGAATATAAAA	TTTTATATTCT	0.115758	0.212037	-0.020451	0.148551	-0.151259	1.50183
TATATATTACA	TGTAATATATA	-0.034592	-0.573059	0.021567	0.247847	1.49842	0.527782
ATAAAAGTTCA	TGAACTTTTAT	-0.866977	0.103254	-0.659066	-0.016132	-0.582898	1.49473
TGTTAATAAAA	TTTTATTAACA	0.14272	0.072196	-0.606848	0.11596	-0.102923	1.49138
GGGATATATAA	TTATATATCCC	0.219169	0.033801	-0.223937	0.02979	0.071579	1.48779
GTTTATTGTAA	TTACAATAAAC	0.616488	-0.230243	0.268284	-0.767661	1.48342	0.223574
CAGTAAAATAA	TTATTTTACTG	-0.29262	0.435309	-0.835303	-0.051396	0.262751	1.47805
AACTTTTATGA	TCATAAAAGTT	0.087816	-0.525597	-0.471466	-1.09009	1.47796	-0.464865
TCAATAAGTCA	TGACTTATTGA	-0.155692	-0.366927	-0.438231	0.041081	0.016215	1.4778
AATATATTACT	AGTAATATATT	0.340776	0.248138	0.177674	-0.17663	1.47715	0.442569
AAATAAACCCA	TGGGTTTATTT	-0.497322	-0.021019	0.194416	0.792817	-0.681771	1.47489
CATGTTTTGGA	TCCAAAACATG	0.630892	-0.270714	0.303114	-0.783419	1.472	-0.188194
CAAAATGTCAC	GTGACATTTTG	-0.867463	0.372796	0.098751	-0.137881	0.198472	1.47162
ATTAGAATAAT	ATTATTCTAAT	-0.072192	0.514379	0.081083	0.271783	1.4703	0.296659
AGAAGAATTTC	GAAATTCTTCT	0.08171	-0.233521	0.035392	0.398849	0.064547	1.46497
CACCCAGGCTG	CAGCCTGGGTG	-0.08403	0.006268	0.591019	0.525155	0.066022	1.45707
TGAACTTTTAA	TTAAAAGTTCA	0.490992	-1.06324	0.048436	-0.612793	1.45642	-0.136866
AATATATTACC	GGTAATATATT	0.177495	-0.083534	-0.260329	0.23465	1.45629	0.642254
CTGAAAACTAA	TTAGTTTTCAG	0.002508	-0.335075	0.069881	0.047881	-0.090181	1.44908
AGTAATATATA	TATATATTACT	-0.168086	0.328986	-0.054017	0.269629	0.344179	1.44829
TTTAATAAAAA	TTTTTATTAAA	-0.178392	0.314194	-0.973998	0.621778	0.428789	1.44748
CTTTGTCATTA	TAATGACAAAG	0.240164	0.267459	0.686732	-0.509904	1.44586	-0.560104
TTAATATAAAA	TTTTATATTAA	-0.056247	0.389178	-0.073054	0.225853	0.591652	1.44189
[truncated: 948 more rows]
